# Supplementary material for: The conserved centrosomin motif, γTuNA, forms a dimer that directly activates microtubule nucleation by the γ-tubulin ring complex (γTuRC)
Source: eLife journal article supplement (doi:10.7554/elife.80053), 2022-12-14
Supplement: fig1-data1 [file Figure 1 - Source Data 1.xlsx]

## Sheet: Figure 1D
+ gTuNA wildtype (raw "EB1" spots)						+ gTuNA F75A mutant (raw "EB1" spots)
uM gTuNA (WT)	Dataset_1	Dataset_2	Dataset_3			uM gTuNA F75A	Dataset_1	Dataset_2	Dataset_3
3.6	201	1126	426			3.6	5	16	10
1.8	113	794	225			1.8	1	132	11
1	95	681	200			1	6	6	8
0.5	32	310	57			0.5	14	10	7
0.25	8	38	8			0.25	14	22	9
Buffer	2	13	8			Buffer	3	17	4
As fold changes relative to buffer						As fold changes relative to buffer
uM gTuNA (WT)	Dataset_1	Dataset_2	Dataset_3			uM gTuNA F75A	Dataset_1	Dataset_2	Dataset_3
3.6	100.5	86.6154	53.25			3.6	1.66667	0.941176	2.5
1.8	56.5	61.0769	28.125			1.8	0.333333	7.76471	2.75
1	47.5	52.3846	25			1	2	0.352941	2
0.5	16	23.8462	7.125			0.5	4.66667	0.588235	1.75
0.25	4	2.92308	1			0.25	4.66667	1.29412	2.25
Buffer	1	1	1			Buffer	1	1	1
WT (uM)	Mean Fold Change	St. Dev	N			F75A (uM)	Mean Fold Change	St. Dev	N
3.6	80.1218	24.2851	3			3.6	1.70261	0.780033	3
1.8	48.5673	17.8509	3			1.8	3.61601	3.79062	3
1	41.6282	14.6061	3			1	1.45098	0.95093	3
0.5	15.6571	8.36585	3			0.5	2.33497	2.1012	3
0.25	2.64103	1.51976	3			0.25	2.73693	1.7382	3
0	1	0	3			0	1	0	3
Wild-type Series						F75A Mutant Series
Linear Regression Data from GraphPad Prism 7						Linear Regression Data from GraphPad Prism 7
95% Confidence Intervals						95% Confidence Intervals
Slope	9.692 to 33.19					Slope	-1.284 to 1.011
Y-intercept	-14.92 to 29.05					Y-intercept	0.4152 to 4.711
X-intercept	-2.673 to 0.5042					X-intercept	2.885 to +infinity
Is slope significantly non-zero?						Is slope significantly non-zero?
F	33.73					F	0.1426
DFn, DFd	1, 3					DFn, DFd	1, 3
P value	0.0102					P value	0.7309
Deviation from zero?	Significant					Deviation from zero?	Not Significant
