# Supplementary material for: The conserved centrosomin motif, γTuNA, forms a dimer that directly activates microtubule nucleation by the γ-tubulin ring complex (γTuRC)
Source: eLife journal article supplement (doi:10.7554/elife.80053), 2022-12-14
Supplement: fig2-figsupp1-data2 [file Figure 2 - Supplement 1 - Source Data 2.xlsx]

## Sheet: protein_quant_2512 (2)
Protein Id	Gene Symbol	Description	Group ID	Number of peptides	Collapsed	Parsimony	Hum_gTuNA1	Hum_gTuNA2	Xen_gTuNA WT1	Xen_gTuNA WT2	Xen_gTuNA Mt1	Xen_gTuNA Mt2
tr|A0A1L8FDD6|A0A1L8FDD6_XENLA	psmd4.L	26S proteasome non-ATPase regulatory subunit 4 OS=Xenopus laevis OX=8355 GN=psmd4.L PE=3 SV=1	0	1	C	UR	117.074	93.7618	97.6775	102.723	113.183	122.31
tr|A0A1L8F5A2|A0A1L8F5A2_XENLA	XELAEV_18042999mg	26S proteasome non-ATPase regulatory subunit 4 OS=Xenopus laevis OX=8355 GN=XELAEV_18042999mg PE=1 SV=1	0	10	C	UR	2406.9	2115.12	2226.55	2029.17	2659.92	2561.1
tr|A0A1L8H7C4|A0A1L8H7C4_XENLA	ipo9.S	Importin N-terminal domain-containing protein OS=Xenopus laevis OX=8355 GN=ipo9.S PE=1 SV=1	1	2	C	UR	571.901	466.306	450.626	443.312	510.57	429.928
tr|A0A1L8HEI3|A0A1L8HEI3_XENLA	XELAEV_18012175mg	Importin N-terminal domain-containing protein OS=Xenopus laevis OX=8355 GN=XELAEV_18012175mg PE=1 SV=1	1	13	C	UR	1869.37	1763.83	1652.4	1878.93	1921.12	1911.43
tr|Q8AY70|Q8AY70_XENLA	gapdh.L	Glyceraldehyde-3-phosphate dehydrogenase OS=Xenopus laevis OX=8355 GN=gapdh.L PE=2 SV=1	2	44	C	UR	4274.71	4343.98	4591.55	5216.28	5265.66	6027.56
tr|Q7ZY52|Q7ZY52_XENLA	XELAEV_18036725mg	Glyceraldehyde-3-phosphate dehydrogenase OS=Xenopus laevis OX=8355 GN=XELAEV_18036725mg PE=1 SV=1	2	72	C	UR	9360.85	9057.64	9812.03	11435.8	11468.3	13944.7
tr|A0A310U4X8|A0A310U4X8_XENLA	XELAEV_18000200mg	Glyceraldehyde-3-phosphate dehydrogenase (Fragment) OS=Xenopus laevis OX=8355 GN=XELAEV_18000200mg PE=3 SV=1	2	4	C	UR	330.059	342.872	316.091	301.406	352.074	338.404
tr|Q7ZXF4|Q7ZXF4_XENLA	mthfd1.L	C-1-tetrahydrofolate synthase, cytoplasmic OS=Xenopus laevis OX=8355 GN=mthfd1.L PE=1 SV=1	3	22	C	UR	2661.32	4055.99	6155.31	5608.1	4487.18	5198.51
tr|A0A310UCZ7|A0A310UCZ7_XENLA	XELAEV_18004235mg	Uncharacterized protein OS=Xenopus laevis OX=8355 GN=XELAEV_18004235mg PE=1 SV=1	4	57	C	UR	7320.2	7793.77	8474.64	8301.39	7705.41	8376.75
tr|A0A1L8I385|A0A1L8I385_XENLA	XELAEV_18008634mg	Uncharacterized protein OS=Xenopus laevis OX=8355 GN=XELAEV_18008634mg PE=1 SV=1	4	2	C	UR	296.676	210.888	241.99	238.26	236.984	264.234
tr|A0A1L8GTE5|A0A1L8GTE5_XENLA	XELAEV_18020799mg	Uncharacterized protein OS=Xenopus laevis OX=8355 GN=XELAEV_18020799mg PE=4 SV=1	4	29	C	UR	4562.4	4308.34	3776.22	3935.91	3561.22	3829.6
tr|A0A1L8H034|A0A1L8H034_XENLA	XELAEV_18018012mg	Uncharacterized protein OS=Xenopus laevis OX=8355 GN=XELAEV_18018012mg PE=4 SV=1	4	2	C	UR	460.903	627.364	731.322	986.569	1025.42	898.65
tr|Q7ZY53|Q7ZY53_XENLA	rpl17.L	60S ribosomal protein L17 (Fragment) OS=Xenopus laevis OX=8355 GN=rpl17.L PE=2 SV=1	4	6	C	UR	605.319	518.645	606.375	749.624	761.91	623.372
sp|A4QNS7|MIOB_XENLA	mios-b	GATOR complex protein MIOS-B OS=Xenopus laevis OX=8355 GN=mios-b PE=2 SV=1	5	7	C	UR	1983.3	1735.8	1093.09	1014.2	703.913	743.73
sp|Q7ZWU1|STIP1_XENLA	stip1	Stress-induced-phosphoprotein 1 OS=Xenopus laevis OX=8355 GN=stip1 PE=2 SV=1	6	26	C	UR	10389.5	8228.36	4167.19	4708.01	4171.06	3633.14
tr|A0A1L8GCS1|A0A1L8GCS1_XENLA	XELAEV_18024227mg	Uncharacterized protein OS=Xenopus laevis OX=8355 GN=XELAEV_18024227mg PE=1 SV=1	6	5	C	UR	1063.15	994.991	625.228	787.242	563.552	640.009
tr|Q498K6|Q498K6_XENLA	copb1.S	Coatomer subunit beta OS=Xenopus laevis OX=8355 GN=copb1.S PE=2 SV=1	7	18	C	UR	2706.99	2846	2251.92	2390.12	2179.71	2363.77
tr|A0A1L8GP15|A0A1L8GP15_XENLA	iars1.L	Isoleucyl-tRNA synthetase OS=Xenopus laevis OX=8355 GN=iars1.L PE=3 SV=1	8	18	C	UR	3705.88	4563.31	4534.59	4376.2	5076.8	4742.16
tr|A0A1L8GH96|A0A1L8GH96_XENLA	XELAEV_18025750mg	Isoleucyl-tRNA synthetase OS=Xenopus laevis OX=8355 GN=XELAEV_18025750mg PE=1 SV=1	8	10	C	UR	1270.68	1240.42	1326.3	1315.31	1582.84	1471.79
tr|Q6GNQ0|Q6GNQ0_XENLA	cttn.L	MGC80961 protein OS=Xenopus laevis OX=8355 GN=cttn.L PE=2 SV=1	9	10	C	UR	2092.36	2075.85	2306.6	1692.46	2202.58	2042.09
tr|B7ZQN6|B7ZQN6_XENLA	cttn.S	Cttn protein OS=Xenopus laevis OX=8355 GN=cttn.S PE=2 SV=1	9	3	C	UR	772.565	704.538	769.407	595.86	813.72	815.777
tr|Q2VPK9|Q2VPK9_XENLA	acox1.L	Acyl-coenzyme A oxidase OS=Xenopus laevis OX=8355 GN=acox1.L PE=1 SV=1	10	7	C	UR	531.731	546.794	1249.52	1434.07	466.384	480.15
tr|Q6P421|Q6P421_XENLA	acox1.S	Acyl-coenzyme A oxidase OS=Xenopus laevis OX=8355 GN=acox1.S PE=2 SV=1	10	4	C	UR	364.709	324.391	572.057	618.374	260.052	275.503
tr|Q91728|Q91728_XENLA	XB5888885.S	Zona pellucida sperm-binding protein 3 OS=Xenopus laevis OX=8355 GN=XB5888885.S PE=2 SV=1	11	4	C	UR	388.695	368.012	413.49	407.006	899.885	1601.13
tr|A0A1L8H3Q4|A0A1L8H3Q4_XENLA	XB5888885.L	Zona pellucida sperm-binding protein 3 OS=Xenopus laevis OX=8355 GN=XB5888885.L PE=1 SV=1	11	5	C	UR	401.146	369.473	398.125	383.629	450.614	1162.89
tr|Q6NTU7|Q6NTU7_XENLA	LOC414512	LOC414512 protein (Fragment) OS=Xenopus laevis OX=8355 GN=LOC414512 PE=2 SV=1	12	1	C	UR	208.353	282.161	347.514	395.807	457.403	527.106
tr|A0A1L8GZZ1|A0A1L8GZZ1_XENLA	XELAEV_18017961mg	Peptidase M60 domain-containing protein OS=Xenopus laevis OX=8355 GN=XELAEV_18017961mg PE=1 SV=1	13	59	C	UR	7208.89	8287.4	9531.34	8625.66	10766.8	10499.6
tr|A0A1L8GPS7|A0A1L8GPS7_XENLA	XELAEV_18023999mg	Dolichyl-diphosphooligosaccharide--protein glycosyltransferase subunit 1 OS=Xenopus laevis OX=8355 GN=XELAEV_18023999mg PE=1 SV=1	14	9	C	UR	1006.57	1127.42	1100.47	1580.41	1420.31	1902.03
tr|Q7ZX69|Q7ZX69_XENLA	rpn1.S	Dolichyl-diphosphooligosaccharide--protein glycosyltransferase subunit 1 OS=Xenopus laevis OX=8355 GN=rpn1.S PE=1 SV=1	14	4	C	UR	219.033	225.064	214.261	266.432	255.754	311.492
tr|Q6GPT0|Q6GPT0_XENLA	MGC82636	Adipocyte-type fatty acid-binding protein OS=Xenopus laevis OX=8355 GN=MGC82636 PE=2 SV=1	15	11	C	UR	1073.15	1396.38	1357.97	1715.36	1903.47	2149.86
tr|Q5FWM7|Q5FWM7_XENLA	fabp4.L	Adipocyte-type fatty acid-binding protein OS=Xenopus laevis OX=8355 GN=fabp4.L PE=2 SV=1	15	4	C	UR	395.355	644.555	568.475	725.439	774.303	862.253
sp|Q92021|NF7B_XENLA		Nuclear factor 7, brain OS=Xenopus laevis OX=8355 PE=1 SV=1	16	19	C	UR	2467.23	2890.02	3133.26	3106.78	3627.13	3904.31
tr|A0A310TP91|A0A310TP91_XENLA	XELAEV_18004555mg	Uncharacterized protein OS=Xenopus laevis OX=8355 GN=XELAEV_18004555mg PE=4 SV=1	16	9	C	UR	1013.11	1163.69	1301.09	1321.91	1658.74	1748.5
tr|A0A1L8GBN4|A0A1L8GBN4_XENLA	trim69.1.L	Uncharacterized protein OS=Xenopus laevis OX=8355 GN=trim69.1.L PE=4 SV=1	16	4	C	UR	549.486	601.693	614.336	641.606	766.59	841.024
sp|Q6GMY9|XPO2_XENLA	cse1l	Exportin-2 OS=Xenopus laevis OX=8355 GN=cse1l PE=2 SV=1	17	30	C	UR	3946.06	3953.44	3992.89	4498.6	4686.5	4638.62
tr|A0A1L8ELC5|A0A1L8ELC5_XENLA	cse1l.S	Chromosome segregation 1-like protein OS=Xenopus laevis OX=8355 GN=cse1l.S PE=1 SV=1	17	11	C	UR	843.002	883.752	931.959	873.449	1046.39	808.835
sp|Q4FZP2|MTNA_XENLA	mri1	Methylthioribose-1-phosphate isomerase OS=Xenopus laevis OX=8355 GN=mri1 PE=2 SV=1	18	7	C	UR	696.561	613.876	662.378	737.501	722.025	824.884
tr|Q7ZYI4|Q7ZYI4_XENLA	katnb1.S	Katanin p80 WD40 repeat-containing subunit B1 OS=Xenopus laevis OX=8355 GN=katnb1.S PE=2 SV=1	19	5	C	UR	1658.66	1666.27	411.982	360.888	366.043	359.512
sp|Q4V7Y7|KTNB1_XENLA	katnb1	Katanin p80 WD40 repeat-containing subunit B1 OS=Xenopus laevis OX=8355 GN=katnb1 PE=1 SV=1	19	6	C	UR	1830.38	1490.72	537.013	569.96	571.305	569.913
tr|A0A1L8HCQ9|A0A1L8HCQ9_XENLA	ltn1.L	E3 ubiquitin-protein ligase listerin OS=Xenopus laevis OX=8355 GN=ltn1.L PE=1 SV=1	20	5	C	UR	902.528	824.47	573.613	557.304	571.911	546.82
tr|Q7ZTR0|Q7ZTR0_XENLA	copb2.S	Coatomer subunit beta' OS=Xenopus laevis OX=8355 GN=copb2.S PE=2 SV=1	21	23	C	UR	4182.2	3879.15	3706.55	3395.72	3439.41	3221.86
tr|A0A1L8GB64|A0A1L8GB64_XENLA	XELAEV_18027896mg	Coatomer subunit beta' OS=Xenopus laevis OX=8355 GN=XELAEV_18027896mg PE=1 SV=1	21	1	C	UR	168.347	137.099	115.67	127.028	130.405	123.747
tr|A0A1L8GGX7|A0A1L8GGX7_XENLA	tpr.S	Nucleoprotein TPR OS=Xenopus laevis OX=8355 GN=tpr.S PE=1 SV=1	22	35	C	UR	3976.03	3944.14	4572.89	3932.1	5137.67	4936.23
tr|A0A1L8HBT8|A0A1L8HBT8_XENLA	XELAEV_18011255mg	Cystatin domain-containing protein OS=Xenopus laevis OX=8355 GN=XELAEV_18011255mg PE=3 SV=1	23	2	C	UR	131.355	123.515	134.517	171.876	153.474	213.316
tr|A0A1L8HGL2|A0A1L8HGL2_XENLA	ranbp2.L	Uncharacterized protein OS=Xenopus laevis OX=8355 GN=ranbp2.L PE=1 SV=1	24	52	C	UR	4355.84	10044.4	12838.6	7609.79	4503.74	5080.95
tr|A0A1L8H8R8|A0A1L8H8R8_XENLA	XELAEV_18015491mg	Uncharacterized protein OS=Xenopus laevis OX=8355 GN=XELAEV_18015491mg PE=1 SV=1	24	27	C	UR	2118.25	4284.26	5576.4	3480.79	2060.18	2227.04
tr|A0A1L8HV16|A0A1L8HV16_XENLA	XELAEV_18005697mg	tRNA-binding domain-containing protein OS=Xenopus laevis OX=8355 GN=XELAEV_18005697mg PE=1 SV=1	25	12	C	UR	1572.53	1565.03	1801.27	1921.48	2074.45	2253.78
tr|A0A1L8HM44|A0A1L8HM44_XENLA	aimp1.S	tRNA-binding domain-containing protein OS=Xenopus laevis OX=8355 GN=aimp1.S PE=4 SV=1	25	4	C	UR	527.818	389.654	517.822	480.705	583.939	580.818
tr|Q7SY98|Q7SY98_XENLA	p4hb.S	Protein disulfide-isomerase OS=Xenopus laevis OX=8355 GN=p4hb.S PE=2 SV=1	26	2	C	UR	206.597	219.375	195.558	216.964	233.312	246.275
tr|Q7ZTJ5|Q7ZTJ5_XENLA	P4hb	Protein disulfide-isomerase (Fragment) OS=Xenopus laevis OX=8355 GN=P4hb PE=2 SV=1	26	13	C	UR	1627.48	1767.52	1506.63	1907.15	1824.04	2091.43
tr|Q7ZWW3|Q7ZWW3_XENLA	XELAEV_18036122mg	Ferritin OS=Xenopus laevis OX=8355 GN=XELAEV_18036122mg PE=2 SV=1	27	5	C	UR	1118.61	1157.77	1256.3	1327.63	1969.73	1627.93
sp|Q7SXA5|FRIL_XENLA		Ferritin light chain, oocyte isoform OS=Xenopus laevis OX=8355 PE=1 SV=1	27	7	C	UR	1014.46	1223	1197.45	1432.94	1657.67	1542.19
tr|Q0IH96|Q0IH96_XENLA	clta.L	Clathrin light chain OS=Xenopus laevis OX=8355 GN=clta.L PE=1 SV=1	28	5	C	UR	763.196	552.346	515.076	516.632	711.875	616.968
tr|Q6DE32|Q6DE32_XENLA	cltb.S	Clathrin light chain OS=Xenopus laevis OX=8355 GN=cltb.S PE=2 SV=1	28	6	C	UR	2362.77	1795.99	1594.43	1833	2508.71	1994.48
tr|Q6PA88|Q6PA88_XENLA	cltb.L	Clathrin light chain OS=Xenopus laevis OX=8355 GN=cltb.L PE=1 SV=1	28	2	C	UR	527.862	380.218	385.577	410.229	668.917	599.676
tr|A0A1L8HVA3|A0A1L8HVA3_XENLA	XELAEV_18005835mg	Albumin domain-containing protein OS=Xenopus laevis OX=8355 GN=XELAEV_18005835mg PE=4 SV=1	30	8	C	UR	1754.06	1470.64	1616.22	1605.19	1073.27	890.468
sp|Q5XGR8|LACB2_XENLA	lactb2	Endoribonuclease LACTB2 OS=Xenopus laevis OX=8355 GN=lactb2 PE=2 SV=1	31	1	C	UR	70.1543	78.223	136.81	150.692	65.4705	89.1122
sp|P55861|MCM2_XENLA	mcm2	DNA replication licensing factor mcm2 OS=Xenopus laevis OX=8355 GN=mcm2 PE=1 SV=2	32	23	C	UR	2458.07	2665.55	2784.54	3071.98	3304	3352.17
tr|Q7SZ98|Q7SZ98_XENLA	anxa1.2.S	Annexin OS=Xenopus laevis OX=8355 GN=anxa1.2.S PE=2 SV=1	32	13	C	UR	1138.49	1233.55	1493.92	2175.97	2178.25	2890.22
sp|Q6NUC2|CSN6_XENLA	cops6	COP9 signalosome complex subunit 6 OS=Xenopus laevis OX=8355 GN=cops6 PE=2 SV=1	33	8	C	UR	520.139	455.508	457.783	574.472	561.154	621.9
tr|A0A1L8EQ60|A0A1L8EQ60_XENLA	carhsp1.S	CSD domain-containing protein OS=Xenopus laevis OX=8355 GN=carhsp1.S PE=1 SV=1	34	4	C	UR	1187.54	1148.08	1249.95	1193.54	1524.54	1589.84
tr|Q52KT0|Q52KT0_XENLA	npepl1.S	MGC115168 protein OS=Xenopus laevis OX=8355 GN=npepl1.S PE=2 SV=1	35	5	C	UR	890.316	831.926	765.623	925.971	906.341	1106.23
tr|A2RV60|A2RV60_XENLA	ecpas.L	LOC100037132 protein OS=Xenopus laevis OX=8355 GN=ecpas.L PE=1 SV=1	36	86	C	UR	8177.72	7673.08	22885.2	20358.1	15432	10835.2
tr|A0A1L8ELX8|A0A1L8ELX8_XENLA	prpf6.S	PRP6 homolog OS=Xenopus laevis OX=8355 GN=prpf6.S PE=4 SV=1	37	2	C	UR	141.988	240.936	226.197	155.44	92.4432	96.321
tr|Q640D3|Q640D3_XENLA	psat1.L	Phosphoserine aminotransferase OS=Xenopus laevis OX=8355 GN=psat1.L PE=2 SV=1	38	14	C	UR	1510.08	1624.34	1626.04	1714.68	1839.79	2048.49
tr|A0A1L8HP78|A0A1L8HP78_XENLA	psat1.S	Phosphoserine aminotransferase OS=Xenopus laevis OX=8355 GN=psat1.S PE=3 SV=1	38	1	C	UR	157.166	148.553	156.639	171.689	170.52	207.732
tr|Q90ZS5|Q90ZS5_XENLA		Spindle checkpoint protein Bub1 OS=Xenopus laevis OX=8355 PE=2 SV=1	39	3	C	UR	144.669	132.879	254.323	215.675	209.157	201.494
tr|Q7T0L5|Q7T0L5_XENLA	txnrd2.S	Thioredoxin-disulfide reductase OS=Xenopus laevis OX=8355 GN=txnrd2.S PE=2 SV=1	40	1	C	UR	95.5881	65.7827	68.9402	52.8293	64.2501	51.4046
tr|A0A1L8FAT2|A0A1L8FAT2_XENLA	aqr.L	Uncharacterized protein OS=Xenopus laevis OX=8355 GN=aqr.L PE=1 SV=1	41	7	C	UR	1264.91	974.719	731.804	790.807	759.113	842.547
tr|A0A1L8G3V8|A0A1L8G3V8_XENLA	tfrc.S	Transferrin receptor protein 1 OS=Xenopus laevis OX=8355 GN=tfrc.S PE=3 SV=1	42	6	C	UR	1070.99	1194.19	1142.29	1282.11	2063.17	2114.56
tr|A0A1L8G9X7|A0A1L8G9X7_XENLA	tfrc.L	Transferrin receptor protein 1 OS=Xenopus laevis OX=8355 GN=tfrc.L PE=1 SV=1	42	5	C	UR	589.116	627.379	630.189	610.7	978.055	968.169
tr|O57468|O57468_XENLA	ywhae.S	14-3-3 protein epsilon OS=Xenopus laevis OX=8355 GN=ywhae.S PE=1 SV=1	43	8	C	UR	823.513	774.44	628.974	696.102	737.593	628.036
tr|A0A1L8HDP1|A0A1L8HDP1_XENLA	XELAEV_18011887mg	14_3_3 domain-containing protein OS=Xenopus laevis OX=8355 GN=XELAEV_18011887mg PE=3 SV=1	43	3	C	UR	166.602	127.219	116.275	145.414	126.445	143.462
tr|A0A1L8GBH6|A0A1L8GBH6_XENLA	ywhaq.L	14_3_3 domain-containing protein OS=Xenopus laevis OX=8355 GN=ywhaq.L PE=3 SV=1	43	3	C	UR	575.815	484.915	398.977	451.173	587.738	557.216
sp|Q8AVQ3|143BB_XENLA	ywhab-b	14-3-3 protein beta/alpha-B OS=Xenopus laevis OX=8355 GN=ywhab-b PE=2 SV=1	43	10	C	UR	1776.32	1709.05	1223.82	1672.84	1736.09	1687.73
sp|Q91896|1433Z_XENLA	ywhaz	14-3-3 protein zeta OS=Xenopus laevis OX=8355 GN=ywhaz PE=2 SV=2	43	12	C	UR	1986.64	1921.88	1781.44	1926.17	2267.21	2112.57
tr|Q8AVW5|Q8AVW5_XENLA	ywhaz.S	Ywhaz-prov protein OS=Xenopus laevis OX=8355 GN=ywhaz.S PE=2 SV=1	43	4	C	UR	543.002	575.803	562.741	698.174	824.183	790.48
tr|Q7ZXH6|Q7ZXH6_XENLA	ywhaq.S	Ywhaq-prov protein OS=Xenopus laevis OX=8355 GN=ywhaq.S PE=2 SV=1	43	3	C	UR	385.828	379.59	324.676	386.041	436.987	432.001
sp|Q6PA58|SDHAA_XENLA	sdha-a	Succinate dehydrogenase [ubiquinone] flavoprotein subunit A, mitochondrial OS=Xenopus laevis OX=8355 GN=sdha-a PE=2 SV=1	44	3	C	UR	260.669	236.954	220.587	223.183	291.249	299.789
tr|A0A1L8H9J8|A0A1L8H9J8_XENLA	esd.S	S-formylglutathione hydrolase OS=Xenopus laevis OX=8355 GN=esd.S PE=1 SV=1	45	5	C	UR	476.845	610.295	838.381	914.61	850.632	1065.28
tr|Q642Q6|Q642Q6_XENLA	esd.L	S-formylglutathione hydrolase OS=Xenopus laevis OX=8355 GN=esd.L PE=1 SV=1	45	4	C	UR	407.583	289.053	331.864	424.463	377.075	437.169
tr|A0A1L8G7H7|A0A1L8G7H7_XENLA	pkr2.L	Uncharacterized protein OS=Xenopus laevis OX=8355 GN=pkr2.L PE=1 SV=1	46	5	C	UR	737.373	864.122	1016.59	1010.45	1217.06	1252.93
sp|Q6NUA1|ANM5_XENLA	prmt5	Protein arginine N-methyltransferase 5 OS=Xenopus laevis OX=8355 GN=prmt5 PE=1 SV=1	47	13	C	UR	2075.98	2147.6	1895.62	2292.88	2323.46	2343.25
tr|Q2VPH9|Q2VPH9_XENLA	prmt5.L	Protein arginine N-methyltransferase 5 OS=Xenopus laevis OX=8355 GN=prmt5.L PE=1 SV=1	47	5	C	UR	675.649	628.431	616.072	698.934	692.757	693.399
tr|Q6NRP7|Q6NRP7_XENLA	srm.L	MGC83147 protein OS=Xenopus laevis OX=8355 GN=srm.L PE=1 SV=1	48	7	C	UR	577.68	618.795	730.936	891.769	715.039	875.149
tr|Q7ZTI8|Q7ZTI8_XENLA	kap	Kap beta 3 protein (Fragment) OS=Xenopus laevis OX=8355 GN=kap beta 3 PE=2 SV=1	49	30	C	UR	5983.91	5354.33	3871.4	4229.47	3912.15	3559.21
tr|B7ZQB8|B7ZQB8_XENLA	RANBP6	Karyopherin-beta 3 variant OS=Xenopus laevis OX=8355 GN=RANBP6 PE=2 SV=1	49	2	C	UR	132.149	130.257	90.4473	100.241	100.601	82.9147
tr|Q6NTT0|Q6NTT0_XENLA	rida.L	2-iminobutanoate/2-iminopropanoate deaminase OS=Xenopus laevis OX=8355 GN=rida.L PE=1 SV=1	50	7	C	UR	666.665	591.064	762.035	813.981	775.915	1012.6
tr|Q7ZYH7|Q7ZYH7_XENLA		Phosphoglycerate kinase OS=Xenopus laevis OX=8355 PE=2 SV=1	51	44	C	UR	6809.03	7233.55	8045.86	7049.87	8852.42	9199.7
tr|Q6DD48|Q6DD48_XENLA	pgk1.L	Phosphoglycerate kinase OS=Xenopus laevis OX=8355 GN=pgk1.L PE=2 SV=1	51	20	C	UR	1852.98	1774.84	1891.01	1917.86	2143.02	2232.69
sp|Q7SZS2|PTER_XENLA	pter	Phosphotriesterase-related protein OS=Xenopus laevis OX=8355 GN=pter PE=2 SV=1	52	3	C	UR	596.359	654.618	334.419	414.583	383.499	458.64
tr|A0A1L8GXG6|A0A1L8GXG6_XENLA	gnpda1.L	Glucosamine-6-phosphate isomerase OS=Xenopus laevis OX=8355 GN=gnpda1.L PE=3 SV=1	53	9	C	UR	965.422	1004.52	897.439	1073.27	1068.22	1165.03
sp|Q6PA43|GNPI2_XENLA	gnpda2	Glucosamine-6-phosphate isomerase 2 OS=Xenopus laevis OX=8355 GN=gnpda2 PE=2 SV=1	53	8	C	UR	848.78	875.084	895.092	979.099	1003.25	1026.28
tr|A9UMM3|A9UMM3_XENLA	amacr.L	Uncharacterized protein OS=Xenopus laevis OX=8355 GN=amacr.L PE=1 SV=1	54	3	C	UR	163.934	181.654	750.605	802.743	167.067	190.432
sp|Q8UUP2|EEDA_XENLA	eed-a	Polycomb protein eed-A OS=Xenopus laevis OX=8355 GN=eed-a PE=1 SV=1	56	13	C	UR	4786.42	3227.54	946.358	1013.06	900.869	936.801
sp|Q6AZS2|EEDB_XENLA	eed-b	Polycomb protein eed-B OS=Xenopus laevis OX=8355 GN=eed-b PE=1 SV=2	56	1	C	UR	131.138	95.9633	72.2384	78.8858	86.4127	73.7461
tr|A1A624|A1A624_XENLA	macrod1.L	Macro domain-containing protein OS=Xenopus laevis OX=8355 GN=macrod1.L PE=2 SV=1	57	1	C	UR	103.321	118.474	365.632	480.3	129.733	132.961
sp|P52297|IMB_XENLA	kpnb1	Importin subunit beta OS=Xenopus laevis OX=8355 GN=kpnb1 PE=1 SV=3	59	37	C	UR	5335.04	6738.66	5882.05	5305.61	4295.76	4352.43
tr|A0A1L8ERZ6|A0A1L8ERZ6_XENLA	XELAEV_18043196mg	Importin N-terminal domain-containing protein OS=Xenopus laevis OX=8355 GN=XELAEV_18043196mg PE=1 SV=1	59	1	C	UR	271.42	408.354	340.95	320.289	290.069	177.285
sp|Q9DE27|RUVB2_XENLA	ruvbl2	RuvB-like 2 OS=Xenopus laevis OX=8355 GN=ruvbl2 PE=2 SV=1	60	30	C	UR	7312.62	5491.71	5057.26	5610.63	4533.76	4834
tr|Q0IH85|Q0IH85_XENLA	ruvbl2.L	RuvB-like helicase OS=Xenopus laevis OX=8355 GN=ruvbl2.L PE=1 SV=1	60	2	C	UR	320.621	176.386	161.337	204.663	126.848	127.734
tr|A0A1L8HCS3|A0A1L8HCS3_XENLA	gart.L	Trifunctional purine biosynthetic protein adenosine-3 OS=Xenopus laevis OX=8355 GN=gart.L PE=1 SV=1	61	24	C	UR	3627.58	3846.24	3788.21	4004.4	4152.44	4872.26
sp|Q6DFB8|TTC37_XENLA	ttc37	Tetratricopeptide repeat protein 37 OS=Xenopus laevis OX=8355 GN=ttc37 PE=2 SV=1	62	62	C	UR	11241.2	9209.04	14798.7	12956.6	9517.23	5868.84
tr|A0A1L8EYB9|A0A1L8EYB9_XENLA	XELAEV_18045434mg	NDK domain-containing protein OS=Xenopus laevis OX=8355 GN=XELAEV_18045434mg PE=1 SV=1	64	16	C	UR	2356.36	2108.68	4632.86	5009.98	2682.8	2652.22
tr|A0A1L8HUD3|A0A1L8HUD3_XENLA	ppid.L	Uncharacterized protein OS=Xenopus laevis OX=8355 GN=ppid.L PE=1 SV=1	65	7	C	UR	1311.25	1559.09	1710.63	1986.46	2425.41	2296.46
tr|Q641F7|Q641F7_XENLA	ppid.S	MGC81732 protein OS=Xenopus laevis OX=8355 GN=ppid.S PE=2 SV=1	65	4	C	UR	715.092	659.105	797.389	816.178	1025.89	954.007
tr|A8E5Z6|A8E5Z6_XENLA	LOC100126631	Peptidyl-prolyl cis-trans isomerase (Fragment) OS=Xenopus laevis OX=8355 GN=LOC100126631 PE=2 SV=1	65	3	C	UR	774.845	708.535	428.184	475.539	518.446	487.137
tr|Q7ZXQ2|Q7ZXQ2_XENLA	fus.S	Fus protein OS=Xenopus laevis OX=8355 GN=fus.S PE=2 SV=1	66	17	C	UR	3263.33	2680.91	2005.52	1519.71	1748.42	1383.48
tr|Q6DKB4|Q6DKB4_XENLA	MGC84691	MGC84691 protein OS=Xenopus laevis OX=8355 GN=MGC84691 PE=2 SV=1	66	3	C	UR	394.928	273.224	189.081	157.181	191.54	137.941
tr|A0A1L8H831|A0A1L8H831_XENLA	taf15.S	Uncharacterized protein OS=Xenopus laevis OX=8355 GN=taf15.S PE=1 SV=1	66	11	C	UR	2168.97	1777.29	1440.52	1101.08	1301.1	1041.42
tr|Q6DCR4|Q6DCR4_XENLA	taf15.S	MGC80893 protein OS=Xenopus laevis OX=8355 GN=taf15.S PE=2 SV=1	66	1	C	UR	209.49	87.5854	47.8197	21.6011	41.1989	21.6673
tr|Q66J39|Q66J39_XENLA	taf15.L	MGC82028 protein OS=Xenopus laevis OX=8355 GN=taf15.L PE=2 SV=1	66	4	C	UR	1442.97	1058.93	739.989	612.139	811.15	595.347
sp|Q66J30|DCT2A_XENLA	dctn2-a	Dynactin subunit 2-A OS=Xenopus laevis OX=8355 GN=dctn2-a PE=2 SV=1	67	3	C	UR	903.267	825.491	576.065	567.284	713.815	723.266
sp|Q6IRB3|DCT2B_XENLA	dctn2-b	Dynactin subunit 2-B OS=Xenopus laevis OX=8355 GN=dctn2-b PE=2 SV=1	67	8	C	UR	2352.33	1937.82	1520.43	1555.66	1717.29	1792.26
tr|A0A1L8FGR1|A0A1L8FGR1_XENLA	cnot3.S	Uncharacterized protein OS=Xenopus laevis OX=8355 GN=cnot3.S PE=1 SV=1	68	2	C	UR	231.935	205.856	194.14	192.09	195.134	222.983
sp|Q7ZWR2|SYCC_XENLA	cars1	Cysteine--tRNA ligase, cytoplasmic OS=Xenopus laevis OX=8355 GN=cars1 PE=2 SV=1	69	19	C	UR	2507.54	2501.03	2532.06	2820.83	3218.82	3105.72
tr|A0A1L8GSX4|A0A1L8GSX4_XENLA	myo5a.S	Uncharacterized protein OS=Xenopus laevis OX=8355 GN=myo5a.S PE=1 SV=1	70	9	C	UR	1354.63	1260.13	1078.9	1101.26	1234.97	1226.1
tr|A0A1L8FX50|A0A1L8FX50_XENLA	exoc3.L	Exocyst complex component 3 OS=Xenopus laevis OX=8355 GN=exoc3.L PE=1 SV=1	71	2	C	UR	243.842	315.867	219.877	206.212	222.174	207.987
sp|Q7ZXE1|CPT2_XENLA	cpt2	Carnitine O-palmitoyltransferase 2, mitochondrial OS=Xenopus laevis OX=8355 GN=cpt2 PE=2 SV=1	72	2	C	UR	407.399	456.237	522.786	595.242	407.984	473.397
tr|A0A1L8EXD6|A0A1L8EXD6_XENLA	XELAEV_18045096mg	GLOBIN domain-containing protein OS=Xenopus laevis OX=8355 GN=XELAEV_18045096mg PE=3 SV=1	73	4	C	UR	569.253	684.131	611.203	806.889	847.636	924.244
tr|A0A1L8EXB9|A0A1L8EXB9_XENLA	XELAEV_18045095mg	GLOBIN domain-containing protein OS=Xenopus laevis OX=8355 GN=XELAEV_18045095mg PE=3 SV=1	73	5	C	UR	1081.91	1354.23	1283.89	1524.09	1726.63	1608.19
tr|Q6GPU5|Q6GPU5_XENLA	MGC82602	MGC82602 protein OS=Xenopus laevis OX=8355 GN=MGC82602 PE=2 SV=1	73	8	C	UR	1296.99	1392.11	1455.21	1687.25	1643.96	1773.88
tr|A0A1L8GQX2|A0A1L8GQX2_XENLA	ldhb.S	L-lactate dehydrogenase OS=Xenopus laevis OX=8355 GN=ldhb.S PE=1 SV=1	74	21	C	UR	3563.28	3309.33	3908.16	3951.8	4513.12	4699.66
sp|P42120|LDHA_XENLA	ldha	L-lactate dehydrogenase A chain OS=Xenopus laevis OX=8355 GN=ldha PE=2 SV=2	74	17	C	UR	3442.77	3182.25	3422.3	3473.12	4388.95	4377.46
tr|Q7ZTL1|Q7ZTL1_XENLA	acaa2.L	Acaa2-prov protein OS=Xenopus laevis OX=8355 GN=acaa2.L PE=1 SV=1	75	7	C	UR	1492.75	1526.48	1662.28	1702.3	1883.25	1793.93
sp|Q2TAF3|EMAL4_XENLA	eml4	Echinoderm microtubule-associated protein-like 4 OS=Xenopus laevis OX=8355 GN=eml4 PE=2 SV=1	76	19	C	UR	2414.01	2286.14	2690.23	2294.47	2712.98	2504.54
tr|A0A1L8F009|A0A1L8F009_XENLA	XELAEV_18041205mg	WD_REPEATS_REGION domain-containing protein OS=Xenopus laevis OX=8355 GN=XELAEV_18041205mg PE=1 SV=1	76	8	C	UR	965.89	907.675	990.803	878.782	1021.4	999.373
tr|A0A1L8HT50|A0A1L8HT50_XENLA	XELAEV_18005061mg	Fibrinogen C-terminal domain-containing protein OS=Xenopus laevis OX=8355 GN=XELAEV_18005061mg PE=1 SV=1	77	12	C	UR	2061.15	2223.67	2478.02	2048.12	2637.71	2475.38
tr|Q5U4L0|Q5U4L0_XENLA	cgl.2.L	LOC100101274 protein OS=Xenopus laevis OX=8355 GN=cgl.2.L PE=1 SV=1	77	5	C	UR	772.716	1137.05	1420.81	1014.91	1551.1	1381.45
tr|Q91719|Q91719_XENLA	cgl.2.S	Cortical granule lectin OS=Xenopus laevis OX=8355 GN=cgl.2.S PE=2 SV=2	77	1	C	UR	120.558	133.592	160.779	128.925	175.371	142.726
tr|A0A1L8GAZ7|A0A1L8GAZ7_XENLA	XELAEV_18027854mg	GYF domain-containing protein OS=Xenopus laevis OX=8355 GN=XELAEV_18027854mg PE=4 SV=1	78	4	C	UR	394.885	317.39	279.468	291.21	267.035	275.448
tr|Q7ZXB3|Q7ZXB3_XENLA	wu:fc30a11	Wu:fc30a11 protein (Fragment) OS=Xenopus laevis OX=8355 GN=wu:fc30a11 PE=2 SV=1	79	32	C	UR	6744.38	5582.96	4111.19	3667.28	2142.1	2246.14
tr|A0A1L8GF25|A0A1L8GF25_XENLA	XELAEV_18024882mg	AP-1 complex subunit gamma OS=Xenopus laevis OX=8355 GN=XELAEV_18024882mg PE=3 SV=1	79	3	C	UR	863.854	656.013	430.642	374.467	223.46	222.075
tr|A0A1L8GG25|A0A1L8GG25_XENLA	XELAEV_18025336mg	DEAH box protein 9 OS=Xenopus laevis OX=8355 GN=XELAEV_18025336mg PE=3 SV=1	80	10	C	UR	1506.45	1396.71	1408.78	1370.6	1568.12	1544.82
sp|O73787|GCP3_XENLA	tubgcp3	Gamma-tubulin complex component 3 homolog OS=Xenopus laevis OX=8355 GN=tubgcp3 PE=1 SV=1	81	52	C	UR	11627.3	11642.4	8735.95	7825.59	3356.48	3292.21
tr|A0A1L8HH01|A0A1L8HH01_XENLA	tubgcp3.L	Gamma-tubulin complex component OS=Xenopus laevis OX=8355 GN=tubgcp3.L PE=3 SV=1	81	13	C	UR	2174.97	2247.64	1716.76	1719.78	667.225	641.36
tr|A0A1L8G7M9|A0A1L8G7M9_XENLA	xrn2.L	5'-3' exoribonuclease OS=Xenopus laevis OX=8355 GN=xrn2.L PE=1 SV=1	82	21	C	UR	2867.09	2812.93	3798.87	3456.77	2257.76	1973.93
tr|A0A1L8G1K6|A0A1L8G1K6_XENLA	XELAEV_18028844mg	5'-3' exoribonuclease OS=Xenopus laevis OX=8355 GN=XELAEV_18028844mg PE=3 SV=1	82	1	C	UR	52.0287	49.4014	64.6542	64.1297	38.9268	36.7673
tr|Q6NRL7|Q6NRL7_XENLA	fkbp4.L	Peptidylprolyl isomerase OS=Xenopus laevis OX=8355 GN=fkbp4.L PE=1 SV=1	83	1	C	UR	185.134	156.05	153.834	199.914	209.155	233.201
tr|Q6NUB8|Q6NUB8_XENLA	fkbp4.S	Peptidylprolyl isomerase OS=Xenopus laevis OX=8355 GN=fkbp4.S PE=2 SV=1	83	7	C	UR	782.408	1018.52	1113.81	1342.25	1472.58	1551.07
tr|A0A1L8GS40|A0A1L8GS40_XENLA	snrnp200.S	Uncharacterized protein OS=Xenopus laevis OX=8355 GN=snrnp200.S PE=1 SV=1	84	28	C	UR	3748.52	3852.15	3629.79	3652.18	3957.72	3926.9
tr|A0A1L8H1K0|A0A1L8H1K0_XENLA	XELAEV_18018578mg	Uncharacterized protein OS=Xenopus laevis OX=8355 GN=XELAEV_18018578mg PE=1 SV=1	84	3	C	UR	209.288	234.46	204.368	201.45	243.606	219.972
tr|A0A1L8FMV1|A0A1L8FMV1_XENLA	lig1.L	DNA ligase OS=Xenopus laevis OX=8355 GN=lig1.L PE=1 SV=1	85	16	C	UR	1712.86	2316.29	2465.24	2480.01	2858.25	2972.11
sp|Q6DD06|ZC3HF_XENLA	zc3h15	Zinc finger CCCH domain-containing protein 15 OS=Xenopus laevis OX=8355 GN=zc3h15 PE=2 SV=1	86	8	C	UR	1125.02	1265.44	1368.33	1409.74	1641.33	1661.04
tr|A0A1L8G191|A0A1L8G191_XENLA	XELAEV_18028669mg	Glutamyl-tRNA synthetase OS=Xenopus laevis OX=8355 GN=XELAEV_18028669mg PE=1 SV=1	87	13	C	UR	1058.94	948.328	1123.65	1179	1396.4	1246.16
tr|B1WBE0|B1WBE0_XENLA	eprs1.S	Glutamyl-tRNA synthetase OS=Xenopus laevis OX=8355 GN=eprs1.S PE=2 SV=1	87	1	C	UR	170.086	126.039	236.483	155.697	284.797	147.554
tr|A0A1L8G6S2|A0A1L8G6S2_XENLA	eprs1.L	Glutamyl-tRNA synthetase OS=Xenopus laevis OX=8355 GN=eprs1.L PE=1 SV=1	87	54	C	UR	7710.45	7652.85	8809.76	8528.66	10957.1	9177
tr|A0A1L8FQC1|A0A1L8FQC1_XENLA	map4.S	Microtubule-associated protein OS=Xenopus laevis OX=8355 GN=map4.S PE=4 SV=1	88	9	C	UR	1002.82	1147.98	1395.87	1525.73	1866.58	1926.26
tr|A0A1L8FUT9|A0A1L8FUT9_XENLA	XELAEV_18030528mg	Microtubule-associated protein OS=Xenopus laevis OX=8355 GN=XELAEV_18030528mg PE=1 SV=1	88	17	C	UR	2514.28	3111.09	3874.34	4075.43	5052.37	5345.5
tr|Q9YI90|Q9YI90_XENLA	map4.L	Microtubule-associated protein OS=Xenopus laevis OX=8355 GN=map4.L PE=2 SV=1	88	1	C	UR	55.9662	69.1646	81.7296	90.2757	114.07	120.851
tr|A0A1L8F1Q6|A0A1L8F1Q6_XENLA	XELAEV_18041759mg	HECT-type E3 ubiquitin transferase OS=Xenopus laevis OX=8355 GN=XELAEV_18041759mg PE=1 SV=1	89	44	C	UR	6223.83	6280.34	6766.7	6283.23	7689.1	7919.94
tr|Q6DJJ1|Q6DJJ1_XENLA	rps25.L	40S ribosomal protein S25 OS=Xenopus laevis OX=8355 GN=rps25.L PE=1 SV=1	90	3	C	UR	268.308	338.889	348.066	497.64	500.994	504.587
tr|A0A1L8GNI9|A0A1L8GNI9_XENLA	ep300.L	Histone acetyltransferase OS=Xenopus laevis OX=8355 GN=ep300.L PE=1 SV=1	91	3	C	UR	380.469	355.093	552.382	390.358	116.292	114.006
tr|A0A1L8GGW2|A0A1L8GGW2_XENLA	ep300.S	Histone acetyltransferase OS=Xenopus laevis OX=8355 GN=ep300.S PE=1 SV=1	91	23	C	UR	4166.39	3652.34	5253.49	4215.1	1803.23	1816.15
tr|A0A1L8FHL3|A0A1L8FHL3_XENLA	XELAEV_18037980mg	UBR-type domain-containing protein OS=Xenopus laevis OX=8355 GN=XELAEV_18037980mg PE=1 SV=1	92	69	C	UR	9887.62	8620.67	8384.79	6814.65	9179.28	7562.31
tr|A0A1L8FPC4|A0A1L8FPC4_XENLA	XELAEV_18036413mg	Uncharacterized protein OS=Xenopus laevis OX=8355 GN=XELAEV_18036413mg PE=4 SV=1	92	1	C	UR	157.17	105.078	237.924	202.382	311.715	227.923
sp|Q6GM53|IKKA_XENLA	chuk	Inhibitor of nuclear factor kappa-B kinase subunit alpha OS=Xenopus laevis OX=8355 GN=chuk PE=2 SV=1	93	5	C	UR	516.202	478.494	758.211	762.781	597.9	565.217
sp|Q498E7|SMAL1_XENLA	smarcal1	SWI/SNF-related matrix-associated actin-dependent regulator of chromatin subfamily A-like protein 1 OS=Xenopus laevis OX=8355 GN=smarcal1 PE=2 SV=1	94	7	C	UR	599.48	608.672	554.556	481.403	409.166	352.327
tr|A0A1L8HBR9|A0A1L8HBR9_XENLA	XELAEV_18016520mg	Ribonucleoside-diphosphate reductase OS=Xenopus laevis OX=8355 GN=XELAEV_18016520mg PE=1 SV=1	95	39	C	UR	5505.99	5368.38	4920.63	5388	5615.41	5170.71
tr|A0A1L8HJI5|A0A1L8HJI5_XENLA	XELAEV_18013932mg	Ribonucleoside-diphosphate reductase OS=Xenopus laevis OX=8355 GN=XELAEV_18013932mg PE=1 SV=1	95	5	C	UR	562.638	529.072	505.141	521.078	502.327	522.328
tr|A0A1L8G9Q5|A0A1L8G9Q5_XENLA	XELAEV_18027283mg	Centrosomal protein of 162 kDa OS=Xenopus laevis OX=8355 GN=XELAEV_18027283mg PE=3 SV=1	96	2	C	UR	331.814	469.489	177.066	239.41	170.648	171.619
tr|A0A1L8HZP3|A0A1L8HZP3_XENLA	pole.L	DNA polymerase epsilon catalytic subunit OS=Xenopus laevis OX=8355 GN=pole.L PE=1 SV=1	97	5	C	UR	532.599	541.855	457.561	463.349	459.629	554.213
tr|A0A1L8FTA2|A0A1L8FTA2_XENLA	XELAEV_18033797mg	Uncharacterized protein OS=Xenopus laevis OX=8355 GN=XELAEV_18033797mg PE=1 SV=1	98	10	C	UR	999.09	1423.67	1828.08	2449.13	2242.82	2146.22
tr|Q3B8I3|Q3B8I3_XENLA	rpl7.L	MGC130910 protein OS=Xenopus laevis OX=8355 GN=rpl7.L PE=2 SV=1	98	4	C	UR	285.335	304.242	429.813	461.207	506.423	459.99
tr|A0A1L8FXQ8|A0A1L8FXQ8_XENLA	exoc2.L	Exocyst complex component 2 OS=Xenopus laevis OX=8355 GN=exoc2.L PE=1 SV=1	99	13	C	UR	1274.39	1817.35	1272.18	1213.39	1046.27	1026.12
tr|A0A310TPS0|A0A310TPS0_XENLA	hyou1.S	Uncharacterized protein OS=Xenopus laevis OX=8355 GN=hyou1.S PE=1 SV=1	100	22	C	UR	1941.86	1920.41	1887.33	2040.86	2410.44	2680.05
tr|A0A1L8FLI2|A0A1L8FLI2_XENLA	hyou1.L	Uncharacterized protein OS=Xenopus laevis OX=8355 GN=hyou1.L PE=1 SV=1	100	9	C	UR	1037.89	1150.15	1124.76	1185.37	1486.21	1715.99
tr|A0A1L8FH39|A0A1L8FH39_XENLA	XELAEV_18037826mg	Uncharacterized protein OS=Xenopus laevis OX=8355 GN=XELAEV_18037826mg PE=3 SV=1	101	27	C	UR	4306.51	4505.25	4733.47	5049.54	5575.17	5919.9
tr|Q6NTJ6|Q6NTJ6_XENLA	LOC414586	LOC414586 protein (Fragment) OS=Xenopus laevis OX=8355 GN=LOC414586 PE=2 SV=1	101	8	C	UR	670.378	661.1	669.987	729.741	812.502	870.331
tr|Q6DCT5|Q6DCT5_XENLA	aldh2.L	MGC80785 protein OS=Xenopus laevis OX=8355 GN=aldh2.L PE=1 SV=1	101	5	C	UR	724.729	719.146	555.258	718.127	709.509	919.581
tr|A9ULZ0|A9ULZ0_XENLA	impa2.L	Inositol-1-monophosphatase OS=Xenopus laevis OX=8355 GN=impa2.L PE=2 SV=1	102	3	C	UR	285.856	284.004	251.474	288.097	307.817	358.218
tr|A0A1L8ER08|A0A1L8ER08_XENLA	XELAEV_18047784mg	Uncharacterized protein OS=Xenopus laevis OX=8355 GN=XELAEV_18047784mg PE=4 SV=1	103	6	C	UR	1118.64	1262.15	1155.51	873.065	767.516	712.968
tr|B1WBD4|B1WBD4_XENLA	LOC100158433	LOC100158433 protein (Fragment) OS=Xenopus laevis OX=8355 GN=LOC100158433 PE=2 SV=1	103	1	C	UR	137.007	168.162	246.121	176.448	129.24	113.75
sp|P26642|EF1GA_XENLA	eef1g-a	Elongation factor 1-gamma-A OS=Xenopus laevis OX=8355 GN=eef1g-a PE=1 SV=1	104	13	C	UR	2637.31	2584.55	2353.95	2990.48	2889.08	2872.55
sp|Q91375|EF1GB_XENLA	eef1g-b	Elongation factor 1-gamma-B OS=Xenopus laevis OX=8355 GN=eef1g-b PE=2 SV=1	104	23	C	UR	6114.7	6321.04	5652.87	6211.15	7047.2	6362.33
tr|B7ZR52|B7ZR52_XENLA	LOC397861	LOC397861 protein OS=Xenopus laevis OX=8355 GN=LOC397861 PE=2 SV=1	104	1	C	UR	64.6649	64.8918	42.5916	53.4081	60.5079	65.1297
tr|A0A1L8F8M2|A0A1L8F8M2_XENLA	XELAEV_18039228mg	Uncharacterized protein OS=Xenopus laevis OX=8355 GN=XELAEV_18039228mg PE=1 SV=1	105	29	C	UR	3689.83	3939.96	4471.53	4465.68	3829.39	4924.83
tr|A0A1L8GNT8|A0A1L8GNT8_XENLA	adsl.L	Adenylosuccinate lyase OS=Xenopus laevis OX=8355 GN=adsl.L PE=1 SV=1	106	24	C	UR	3366.26	3642.8	4004.67	3830.63	4838.46	4832.84
tr|A0A1L8GAV7|A0A1L8GAV7_XENLA	XELAEV_18027786mg	Phenylalanyl-tRNA synthetase beta subunit OS=Xenopus laevis OX=8355 GN=XELAEV_18027786mg PE=1 SV=1	107	5	C	UR	511.581	588.706	666.95	811.898	777.82	911.002
tr|Q9DGE5|Q9DGE5_XENLA	aldob.L	Fructose-bisphosphate aldolase OS=Xenopus laevis OX=8355 GN=aldob.L PE=1 SV=1	108	3	C	UR	502.98	825.482	973.629	1050.46	1166.13	1394.22
tr|Q91384|Q91384_XENLA	XALD3	Fructose-bisphosphate aldolase OS=Xenopus laevis OX=8355 GN=XALD3 PE=2 SV=2	108	18	C	UR	2435.13	2649.12	2865.23	3175.71	3343.95	3812.77
tr|Q3KPP7|Q3KPP7_XENLA	aldoa.L	Fructose-bisphosphate aldolase OS=Xenopus laevis OX=8355 GN=aldoa.L PE=2 SV=1	108	35	C	UR	5095.07	5169.76	5654.98	5963.55	6594.67	6783.94
tr|A1L3N8|A1L3N8_XENLA	LOC100037142	Fructose-bisphosphate aldolase OS=Xenopus laevis OX=8355 GN=LOC100037142 PE=2 SV=1	108	2	C	UR	202.388	161.852	278.096	203.848	185.15	174.91
tr|Q7LZE9|Q7LZE9_XENLA		Fructose-bisphosphate aldolase (Fragments) OS=Xenopus laevis OX=8355 PE=3 SV=1	108	1	C	UR	144.987	111.142	163.675	86.2257	207.715	83.1567
tr|A0A1L8GPI0|A0A1L8GPI0_XENLA	XELAEV_18023939mg	Uncharacterized protein OS=Xenopus laevis OX=8355 GN=XELAEV_18023939mg PE=3 SV=1	109	6	C	UR	703.957	1114.06	1429.04	1943.8	1860.81	1717.07
tr|Q7T0W0|Q7T0W0_XENLA	dld.S	Dihydrolipoyl dehydrogenase OS=Xenopus laevis OX=8355 GN=dld.S PE=2 SV=1	111	2	C	UR	618.9	398.402	345.38	392.61	453.995	443.79
tr|Q6DDJ4|Q6DDJ4_XENLA	tubgcp2.L	Gamma-tubulin complex component OS=Xenopus laevis OX=8355 GN=tubgcp2.L PE=2 SV=1	113	29	C	UR	5782.46	5633.6	4192.78	3577.72	1732.55	1817.13
sp|Q3KQ23|UBA5_XENLA	uba5	Ubiquitin-like modifier-activating enzyme 5 OS=Xenopus laevis OX=8355 GN=uba5 PE=2 SV=1	114	2	C	UR	201.484	295.419	328.925	389.355	348.366	435.385
tr|Q6IND5|Q6IND5_XENLA	vwa5a.2.L	MGC83495 protein OS=Xenopus laevis OX=8355 GN=vwa5a.2.L PE=2 SV=1	115	39	C	UR	3703.99	4430.15	4943.5	5114.53	5525.55	6345.46
tr|A0A1L8I343|A0A1L8I343_XENLA	vwa5a.2.L	Uncharacterized protein OS=Xenopus laevis OX=8355 GN=vwa5a.2.L PE=1 SV=1	115	3	C	UR	248.356	258.427	274.339	306.437	283.845	325.508
tr|A0A1L8HS78|A0A1L8HS78_XENLA	XELAEV_18011171mg	Uncharacterized protein OS=Xenopus laevis OX=8355 GN=XELAEV_18011171mg PE=4 SV=1	115	1	C	UR	82.1054	68.5306	96.8451	74.1244	71.5143	80.4565
tr|A0A1L8HIK9|A0A1L8HIK9_XENLA	eif4b.L	RRM domain-containing protein OS=Xenopus laevis OX=8355 GN=eif4b.L PE=1 SV=1	116	6	C	UR	1523.61	1345.47	1534.89	1249.06	1286.12	1467.11
tr|A0A1L8HA78|A0A1L8HA78_XENLA	XELAEV_18016069mg	RRM domain-containing protein OS=Xenopus laevis OX=8355 GN=XELAEV_18016069mg PE=1 SV=1	116	2	C	UR	329.764	427.156	429.294	387.108	441.699	485.971
tr|A0A1L8FKJ6|A0A1L8FKJ6_XENLA	aip.L	AH receptor-interacting protein OS=Xenopus laevis OX=8355 GN=aip.L PE=1 SV=1	117	9	C	UR	698.14	566.191	1784.83	1780.07	1426.61	1178.89
tr|A0A1L8F885|A0A1L8F885_XENLA	XELAEV_18039051mg	Serine/threonine-protein phosphatase OS=Xenopus laevis OX=8355 GN=XELAEV_18039051mg PE=1 SV=1	118	11	C	UR	1081.11	901.883	1312.62	1246.04	1515.54	1256.35
tr|A0A1L8F3E1|A0A1L8F3E1_XENLA	XELAEV_18042357mg	Serine/threonine-protein phosphatase OS=Xenopus laevis OX=8355 GN=XELAEV_18042357mg PE=3 SV=1	118	3	C	UR	456.254	313.34	539.272	491.993	608.991	495.518
tr|A1L106|A1L106_XENLA	eif2d.S	Eukaryotic translation initiation factor 2D OS=Xenopus laevis OX=8355 GN=eif2d.S PE=1 SV=1	119	7	C	UR	593.405	527.465	567.617	547.348	592.399	636.657
tr|A0A1L8G0T7|A0A1L8G0T7_XENLA	xpo5.S	Importin N-terminal domain-containing protein OS=Xenopus laevis OX=8355 GN=xpo5.S PE=1 SV=1	120	6	C	UR	1129.45	770.126	768.699	775.323	620.937	582.611
tr|Q6AZT3|Q6AZT3_XENLA	mars1.L	Methionine--tRNA ligase, cytoplasmic OS=Xenopus laevis OX=8355 GN=mars1.L PE=2 SV=1	121	6	C	UR	587.208	697.181	809.834	803.752	980.575	920.148
sp|Q6PF21|SYMC_XENLA	mars1	Methionine--tRNA ligase, cytoplasmic OS=Xenopus laevis OX=8355 GN=mars1 PE=2 SV=1	121	7	C	UR	804.678	868.348	869.809	993.439	1130.7	1018.42
tr|A0A1L8GXR4|A0A1L8GXR4_XENLA	fbxo38.L	F-box domain-containing protein OS=Xenopus laevis OX=8355 GN=fbxo38.L PE=1 SV=1	122	2	C	UR	400.042	342.893	298.722	264.539	161.145	152.745
tr|Q32NK4|Q32NK4_XENLA	trmt6.L	tRNA (adenine(58)-N(1))-methyltransferase non-catalytic subunit TRM6 OS=Xenopus laevis OX=8355 GN=trmt6.L PE=2 SV=1	123	5	C	UR	484.068	535.019	733.626	570.339	789.943	774.223
tr|Q6GQD8|Q6GQD8_XENLA	trmt6.S	tRNA (adenine(58)-N(1))-methyltransferase non-catalytic subunit TRM6 OS=Xenopus laevis OX=8355 GN=trmt6.S PE=1 SV=1	123	2	C	UR	230.423	210.089	279.05	198.199	273.117	241.952
tr|A0A1L8F1L3|A0A1L8F1L3_XENLA	smc1a.S	Structural maintenance of chromosomes protein OS=Xenopus laevis OX=8355 GN=smc1a.S PE=1 SV=1	125	9	C	UR	727.277	1076.92	2086.76	2030.99	936.968	805.76
tr|A0A1L8EKF0|A0A1L8EKF0_XENLA	dnajc7.S	Uncharacterized protein OS=Xenopus laevis OX=8355 GN=dnajc7.S PE=1 SV=1	126	15	C	UR	6632.19	7549.27	2193.73	2133.45	1653.27	1553.21
tr|A0A1L8ERN9|A0A1L8ERN9_XENLA	dnajc7.L	Uncharacterized protein OS=Xenopus laevis OX=8355 GN=dnajc7.L PE=1 SV=1	126	4	C	UR	1304.98	1360.72	400.217	338.229	240.487	264.928
tr|Q66J62|Q66J62_XENLA	septin11.S	Septin OS=Xenopus laevis OX=8355 GN=septin11.S PE=1 SV=1	127	3	C	UR	304.859	300.231	276.482	321.325	360.817	374.754
tr|Q6DCR0|Q6DCR0_XENLA	septin6.L	Septin OS=Xenopus laevis OX=8355 GN=septin6.L PE=2 SV=1	127	6	C	UR	683.997	780.189	738.52	862.135	911.201	1021.65
tr|A0A1L8F032|A0A1L8F032_XENLA	XELAEV_18041192mg	Uncharacterized protein OS=Xenopus laevis OX=8355 GN=XELAEV_18041192mg PE=1 SV=1	128	166	C	UR	28691.7	27207.9	25557.1	23702.9	28333.2	25485.3
tr|A0A1L8F9X9|A0A1L8F9X9_XENLA	dync1h1.L	Uncharacterized protein OS=Xenopus laevis OX=8355 GN=dync1h1.L PE=1 SV=1	128	24	C	UR	3347.34	3047.55	2920.24	2797.35	3346.06	2905.4
tr|A0A1L8FU70|A0A1L8FU70_XENLA	mroh1.S	Uncharacterized protein OS=Xenopus laevis OX=8355 GN=mroh1.S PE=1 SV=1	129	6	C	UR	757.399	626.827	389.545	434.042	407.404	470.194
tr|Q4V813|Q4V813_XENLA	adh5.L	S-(hydroxymethyl)glutathione dehydrogenase OS=Xenopus laevis OX=8355 GN=adh5.L PE=1 SV=1	130	12	C	UR	1209.27	1261.96	1411.91	1303.54	1596.85	1617.72
tr|Q6EE34|Q6EE34_XENLA		S-(hydroxymethyl)glutathione dehydrogenase (Fragment) OS=Xenopus laevis OX=8355 PE=2 SV=1	130	1	C	UR	110.631	96.4413	75.2598	61.4856	109.661	90.8832
tr|A0A1L8HM91|A0A1L8HM91_XENLA	XELAEV_18009439mg	S-(hydroxymethyl)glutathione dehydrogenase OS=Xenopus laevis OX=8355 GN=XELAEV_18009439mg PE=3 SV=1	130	10	C	UR	1752.12	1931.16	2170.81	1843.85	2448.83	2354.52
tr|Q4V874|Q4V874_XENLA	psmd1.L	26S proteasome non-ATPase regulatory subunit 1 OS=Xenopus laevis OX=8355 GN=psmd1.L PE=2 SV=1	131	41	C	UR	6530.88	5944.59	6424.66	6524.01	7413.95	7044.62
tr|Q498L1|Q498L1_XENLA	psmd1.S	26S proteasome non-ATPase regulatory subunit 1 OS=Xenopus laevis OX=8355 GN=psmd1.S PE=2 SV=1	131	2	C	UR	203.645	266.675	262.747	275.894	350.826	341.505
tr|A0A1L8H039|A0A1L8H039_XENLA	edc3.L	Enhancer of mRNA-decapping protein 3 OS=Xenopus laevis OX=8355 GN=edc3.L PE=1 SV=1	132	3	C	UR	196.756	174.345	199.797	176.839	157.902	165.51
tr|A0A1L8GT95|A0A1L8GT95_XENLA	edc3.S	Enhancer of mRNA-decapping protein 3 OS=Xenopus laevis OX=8355 GN=edc3.S PE=3 SV=1	132	2	C	UR	148.641	143.434	159.328	132.099	112.317	112.007
tr|Q52KN0|Q52KN0_XENLA	qdpr.L	MGC115198 protein OS=Xenopus laevis OX=8355 GN=qdpr.L PE=2 SV=1	133	6	C	UR	638.578	633.744	701.876	763.631	827.139	796.377
tr|Q3KPR4|Q3KPR4_XENLA	qdpr.S	MGC131372 protein OS=Xenopus laevis OX=8355 GN=qdpr.S PE=2 SV=1	133	2	C	UR	95.7097	86.9262	117.235	131.256	103.116	116.173
sp|Q3KPT7|BDH2_XENLA	bdh2	3-hydroxybutyrate dehydrogenase type 2 OS=Xenopus laevis OX=8355 GN=bdh2 PE=2 SV=1	134	6	C	UR	955.111	1124.3	1006.57	1266.47	1329.47	1534.37
tr|A0JPG0|A0JPG0_XENLA	oxsr1.L	Non-specific serine/threonine protein kinase OS=Xenopus laevis OX=8355 GN=oxsr1.L PE=1 SV=1	135	2	C	UR	424.896	416.656	442.802	467.357	511.057	578.918
tr|Q7ZX28|Q7ZX28_XENLA	prpf8.S	Prp-8-prov protein OS=Xenopus laevis OX=8355 GN=prpf8.S PE=2 SV=1	136	34	C	UR	5020.57	4808.38	4688.96	4350.39	5042.1	4720.54
sp|A1L2Q8|P5CR3_XENLA	pycr3	Pyrroline-5-carboxylate reductase 3 OS=Xenopus laevis OX=8355 GN=pycr3 PE=2 SV=2	137	7	C	UR	1180.54	1048.03	986.428	1064.88	1080.04	1178.9
tr|A0A1L8H5S3|A0A1L8H5S3_XENLA	XELAEV_18014489mg	Cation_ATPase_N domain-containing protein OS=Xenopus laevis OX=8355 GN=XELAEV_18014489mg PE=3 SV=1	138	18	C	UR	1825.28	1750.87	1655.44	1727.06	2930.53	2705.63
tr|A0A1L8FG49|A0A1L8FG49_XENLA	XELAEV_18037480mg	2-phospho-D-glycerate hydro-lyase OS=Xenopus laevis OX=8355 GN=XELAEV_18037480mg PE=1 SV=1	139	84	C	UR	9036.95	9015.82	9243.42	10096.4	10179.1	11293
tr|A0A1L8FLY7|A0A1L8FLY7_XENLA	eno1.L	2-phospho-D-glycerate hydro-lyase OS=Xenopus laevis OX=8355 GN=eno1.L PE=3 SV=1	139	5	C	UR	573.656	605.38	600.042	668.229	659.476	746.135
tr|A0A1L8I1G6|A0A1L8I1G6_XENLA	XELAEV_18007973mg	Uncharacterized protein OS=Xenopus laevis OX=8355 GN=XELAEV_18007973mg PE=1 SV=1	140	25	C	UR	2631.35	2539.39	16536.5	13348	2957.63	3187.89
tr|Q640C3|Q640C3_XENLA	umps.L	OMPdecase OS=Xenopus laevis OX=8355 GN=umps.L PE=1 SV=1	141	11	C	UR	1970.42	1983.12	2017.71	2555.82	2244.88	2772.94
tr|Q6DEA1|Q6DEA1_XENLA	gars1.L	Diadenosine tetraphosphate synthetase OS=Xenopus laevis OX=8355 GN=gars1.L PE=2 SV=1	142	13	C	UR	2346.44	2367.14	2216.25	2550.15	2670.55	2948.64
tr|A0A1L8FQF7|A0A1L8FQF7_XENLA	XELAEV_18032786mg	Diadenosine tetraphosphate synthetase OS=Xenopus laevis OX=8355 GN=XELAEV_18032786mg PE=3 SV=1	142	1	C	UR	145.61	144.048	138.047	152.794	162.744	184.676
tr|Q2NLB1|Q2NLB1_XENLA	gars1.S	Diadenosine tetraphosphate synthetase OS=Xenopus laevis OX=8355 GN=gars1.S PE=2 SV=1	142	3	C	UR	243.308	285.202	212.802	188.212	203.48	307.687
tr|A0A1L8EQG7|A0A1L8EQG7_XENLA	vps35l.S	VPS35 endosomal protein-sorting factor-like OS=Xenopus laevis OX=8355 GN=vps35l.S PE=1 SV=1	143	22	C	UR	4831.28	3652.99	3782.82	3227.9	2266.27	1950.34
tr|A0A1L8HJ96|A0A1L8HJ96_XENLA	XELAEV_18013831mg	Cytoplasmic dynein 2 heavy chain 1 OS=Xenopus laevis OX=8355 GN=XELAEV_18013831mg PE=1 SV=1	144	12	C	UR	1711.79	1711.28	1939.5	1578.59	2252.26	1694.65
tr|A0A1L8HTP1|A0A1L8HTP1_XENLA	lap3.L	Cysteinylglycine-S-conjugate dipeptidase OS=Xenopus laevis OX=8355 GN=lap3.L PE=1 SV=1	145	34	C	UR	4086.97	4331.98	4787.2	4705.34	5453.79	5771.45
tr|A0A1L8HYF8|A0A1L8HYF8_XENLA	XELAEV_18006966mg	HABP4_PAI-RBP1 domain-containing protein OS=Xenopus laevis OX=8355 GN=XELAEV_18006966mg PE=1 SV=1	146	14	C	UR	1669.84	2198.33	3233.1	3680.95	3903.09	4328.25
tr|Q6NRY1|Q6NRY1_XENLA	habp4.S	MGC81067 protein OS=Xenopus laevis OX=8355 GN=habp4.S PE=2 SV=1	146	21	C	UR	1921.2	2311.01	3159.67	3400.47	3915.75	3873.39
tr|A0A1L8HCP0|A0A1L8HCP0_XENLA	XELAEV_18011513mg	Uncharacterized protein OS=Xenopus laevis OX=8355 GN=XELAEV_18011513mg PE=4 SV=1	147	7	C	UR	1318.64	1018.46	484.352	542.021	464.386	457.644
tr|A0A1L8I1H2|A0A1L8I1H2_XENLA	XELAEV_18007955mg	Aldedh domain-containing protein OS=Xenopus laevis OX=8355 GN=XELAEV_18007955mg PE=1 SV=1	148	19	C	UR	1816.12	2369.08	2751.19	2553.15	3005.45	3064.6
tr|A0A1L8HR02|A0A1L8HR02_XENLA	aldh7a1.S	Aldedh domain-containing protein OS=Xenopus laevis OX=8355 GN=aldh7a1.S PE=1 SV=1	148	6	C	UR	329.295	377.778	435.597	371.9	499.224	497.712
tr|A0A1L8GGQ7|A0A1L8GGQ7_XENLA	XELAEV_18025501mg	Uncharacterized protein OS=Xenopus laevis OX=8355 GN=XELAEV_18025501mg PE=4 SV=1	149	1	C	UR	108.853	107.04	103.902	100.439	71.7217	74.2503
tr|Q2LK77|Q2LK77_XENLA	ptx.S	PXN-FBPL OS=Xenopus laevis OX=8355 GN=ptx.S PE=2 SV=1	150	4	C	UR	692.017	792.201	798.708	773.113	1169.29	1103.58
tr|A0A1L8GVE9|A0A1L8GVE9_XENLA	rars1.S	Arginine--tRNA ligase, cytoplasmic OS=Xenopus laevis OX=8355 GN=rars1.S PE=1 SV=1	151	21	C	UR	2778.46	2858.56	2779.6	3044.32	3015.69	3000.5
tr|A0A1L8EL20|A0A1L8EL20_XENLA	XELAEV_18046077mg	Glycylpeptide N-tetradecanoyltransferase OS=Xenopus laevis OX=8355 GN=XELAEV_18046077mg PE=1 SV=1	152	12	C	UR	1724.29	1206.09	1234.83	1230.71	1356.48	1083.28
tr|Q7ZYT2|Q7ZYT2_XENLA	nmt1.L	Glycylpeptide N-tetradecanoyltransferase OS=Xenopus laevis OX=8355 GN=nmt1.L PE=2 SV=1	152	15	C	UR	4381.91	3298.22	3533.87	3457.37	4014.97	3139.99
tr|Q6DKD8|Q6DKD8_XENLA	nmt2.L	Glycylpeptide N-tetradecanoyltransferase OS=Xenopus laevis OX=8355 GN=nmt2.L PE=2 SV=1	152	12	C	UR	2562.15	2071.13	2328.41	2091.4	1604.58	1349.34
tr|A0A1L8FQW5|A0A1L8FQW5_XENLA	nmt2.S	Glycylpeptide N-tetradecanoyltransferase OS=Xenopus laevis OX=8355 GN=nmt2.S PE=3 SV=1	152	1	C	UR	198.025	216.922	206.235	229.663	208.58	237.188
tr|A0A1L8FKU7|A0A1L8FKU7_XENLA	ube4b.L	U-box domain-containing protein OS=Xenopus laevis OX=8355 GN=ube4b.L PE=1 SV=1	153	6	C	UR	646.193	658.784	607.962	646.542	671.536	708.005
sp|Q7ZYP6|MCMBP_XENLA	mcmbp	Mini-chromosome maintenance complex-binding protein OS=Xenopus laevis OX=8355 GN=mcmbp PE=1 SV=1	154	21	C	UR	4448.13	3073.54	2172.26	2310.24	2052.73	2122.29
tr|A0A1L8F8M1|A0A1L8F8M1_XENLA	gnl1.L	CP-type G domain-containing protein OS=Xenopus laevis OX=8355 GN=gnl1.L PE=1 SV=1	155	8	C	UR	1395.25	1324	1172.29	1156.34	1212.67	1176.97
tr|A0A1L8F3P4|A0A1L8F3P4_XENLA	gnl1.S	CP-type G domain-containing protein OS=Xenopus laevis OX=8355 GN=gnl1.S PE=1 SV=1	155	2	C	UR	97.8716	109.186	136.533	146.786	173.684	199.86
tr|A0A1L8I1Z6|A0A1L8I1Z6_XENLA	tnpo1.L	Importin N-terminal domain-containing protein OS=Xenopus laevis OX=8355 GN=tnpo1.L PE=1 SV=1	156	31	C	UR	7409.09	5320.54	3348.64	3758.05	2059.17	1768.78
tr|Q5U4V0|Q5U4V0_XENLA	tnpo1.S	LOC495494 protein OS=Xenopus laevis OX=8355 GN=tnpo1.S PE=2 SV=1	156	1	C	UR	179.058	143.218	126.176	126.878	130.823	134.725
tr|Q5U4R8|Q5U4R8_XENLA	tnpo2.L	LOC495499 protein OS=Xenopus laevis OX=8355 GN=tnpo2.L PE=1 SV=1	156	17	C	UR	1929.35	1629	1625.03	1722.3	1246.07	1135.75
tr|Q5XHG0|Q5XHG0_XENLA	tnpo2.S	LOC495010 protein OS=Xenopus laevis OX=8355 GN=tnpo2.S PE=2 SV=1	156	4	C	UR	323.328	283.352	314.618	296.433	208.587	183.062
tr|Q6NTR5|Q6NTR5_XENLA	acox2.L	Acyl-coenzyme A oxidase OS=Xenopus laevis OX=8355 GN=acox2.L PE=2 SV=1	157	7	C	UR	803.372	766.067	2637.59	2410.51	744.121	677.477
tr|Q7ZX24|Q7ZX24_XENLA	hgs.L	Hepatocyte growth factor-regulated tyrosine kinase substrate OS=Xenopus laevis OX=8355 GN=hgs.L PE=2 SV=2	158	1	C	UR	202.82	183.656	182.534	189.991	212.503	228.467
tr|A0A1L8G7L9|A0A1L8G7L9_XENLA	mthfd1l.L	Formyltetrahydrofolate synthetase OS=Xenopus laevis OX=8355 GN=mthfd1l.L PE=1 SV=1	158	5	C	UR	728.48	729.84	775.574	794.025	873.527	852.23
tr|A0A1L8GP90|A0A1L8GP90_XENLA	rnf123.L	Uncharacterized protein OS=Xenopus laevis OX=8355 GN=rnf123.L PE=4 SV=1	159	7	C	UR	1871.17	1407.05	857.589	895.455	941.309	734.536
tr|A0A1L8GHA7|A0A1L8GHA7_XENLA	XELAEV_18025761mg	B30.2/SPRY domain-containing protein OS=Xenopus laevis OX=8355 GN=XELAEV_18025761mg PE=4 SV=1	159	3	C	UR	427.57	398.22	308.01	282.814	301.184	240.452
tr|A0A1L8F417|A0A1L8F417_XENLA	XELAEV_18042575mg	Uncharacterized protein OS=Xenopus laevis OX=8355 GN=XELAEV_18042575mg PE=1 SV=1	160	18	C	UR	2249.05	2246.32	2011.52	2471.69	2581.31	2661.16
tr|A0A1L8F929|A0A1L8F929_XENLA	actn4.L	Uncharacterized protein OS=Xenopus laevis OX=8355 GN=actn4.L PE=1 SV=1	160	7	C	UR	684.003	703.657	730.22	759.257	864.025	892.562
tr|Q6NRW6|Q6NRW6_XENLA	actn1.S	MGC81191 protein OS=Xenopus laevis OX=8355 GN=actn1.S PE=2 SV=1	160	16	C	UR	1528.15	1647.76	1675.93	1783.49	2074.19	1990.74
tr|A0A1L8HBP7|A0A1L8HBP7_XENLA	vps16.S	Vacuolar protein sorting-associated protein 16 homolog OS=Xenopus laevis OX=8355 GN=vps16.S PE=1 SV=1	161	16	C	UR	3964.06	3049.09	3189.35	3535.27	2637.79	2111.61
sp|Q9PVV4|PCM1_XENLA	pcm1	Pericentriolar material 1 protein OS=Xenopus laevis OX=8355 GN=pcm1 PE=1 SV=1	162	17	C	UR	2749.71	3652.65	2166.08	2067.92	2186.93	2301.96
tr|Q8UVR6|Q8UVR6_XENLA	cap1.S	Adenylyl cyclase-associated protein OS=Xenopus laevis OX=8355 GN=cap1.S PE=1 SV=1	163	5	C	UR	616.487	601.303	572.767	590.644	836.357	807.433
tr|Q6DE60|Q6DE60_XENLA	cap1.L	Adenylyl cyclase-associated protein OS=Xenopus laevis OX=8355 GN=cap1.L PE=1 SV=1	163	15	C	UR	2540.78	2913.7	2754.04	3013.79	3619.23	3922.59
tr|Q6JV11|Q6JV11_XENLA	cap2.L	Adenylyl cyclase-associated protein OS=Xenopus laevis OX=8355 GN=cap2.L PE=2 SV=1	163	2	C	UR	384.498	426.218	395.323	420.2	487.61	560.033
tr|Q5EAX3|Q5EAX3_XENLA	wrap73.L	MGC85022 protein OS=Xenopus laevis OX=8355 GN=wrap73.L PE=1 SV=1	164	4	C	UR	576.745	517.624	462.558	422.967	280.492	281.484
tr|O42480|O42480_XENLA	ipo7.L	MGC52556 protein OS=Xenopus laevis OX=8355 GN=ipo7.L PE=1 SV=1	165	17	C	UR	2770.95	2292.95	1947.08	2317.65	2309.23	2146.92
tr|Q6NS00|Q6NS00_XENLA	ipo7.S	MGC79934 protein OS=Xenopus laevis OX=8355 GN=ipo7.S PE=1 SV=1	165	2	C	UR	269.339	231.602	205.131	186.765	239.158	178.126
tr|A0A1L8GN75|A0A1L8GN75_XENLA	XELAEV_18023410mg	4-alpha-glucanotransferase OS=Xenopus laevis OX=8355 GN=XELAEV_18023410mg PE=1 SV=1	166	16	C	UR	2114.05	2204.9	2210.33	2297.66	2710.49	2771.21
tr|A0A1L8GGF7|A0A1L8GGF7_XENLA	agl.S	4-alpha-glucanotransferase OS=Xenopus laevis OX=8355 GN=agl.S PE=4 SV=1	166	28	C	UR	4201	4362.6	4470.61	4816.73	5655.34	5654.23
tr|A0A1L8FEJ0|A0A1L8FEJ0_XENLA	XELAEV_18036929mg	Uncharacterized protein OS=Xenopus laevis OX=8355 GN=XELAEV_18036929mg PE=3 SV=1	167	14	C	UR	3284.47	3473.97	2051.56	2093.96	2080.24	2099.01
tr|A0A1L8EW87|A0A1L8EW87_XENLA	dync1i2.L	WD_REPEATS_REGION domain-containing protein OS=Xenopus laevis OX=8355 GN=dync1i2.L PE=1 SV=1	169	10	C	UR	1951.61	1519.25	1716.25	1197.09	1765.66	1450.04
tr|Q6NRC5|Q6NRC5_XENLA	dync1i2.S	MGC83936 protein OS=Xenopus laevis OX=8355 GN=dync1i2.S PE=2 SV=1	169	4	C	UR	585.479	497.436	585.884	485.684	650.399	590.608
tr|Q3KQE0|Q3KQE0_XENLA	eif2s2.S	MGC130708 protein OS=Xenopus laevis OX=8355 GN=eif2s2.S PE=2 SV=1	170	2	C	UR	139.229	121.167	117.145	138.869	142.445	160.073
tr|Q6Q4H9|Q6Q4H9_XENLA	eif2s2.L	Eukaryote initiation factor 2 beta OS=Xenopus laevis OX=8355 GN=eif2s2.L PE=1 SV=1	170	2	C	UR	227.677	250.928	235.565	348.858	350.131	336.144
tr|Q6GQ65|Q6GQ65_XENLA	ahsa1.L	MGC80312 protein OS=Xenopus laevis OX=8355 GN=ahsa1.L PE=1 SV=1	171	5	C	UR	467.486	567.088	675.804	626.966	704.057	763.367
tr|A0A1L8GMQ4|A0A1L8GMQ4_XENLA	XELAEV_18023304mg	Dihydropyrimidine dehydrogenase [NADP(+)] OS=Xenopus laevis OX=8355 GN=XELAEV_18023304mg PE=1 SV=1	172	5	C	UR	517.493	563.891	633.853	650.25	754.244	824.686
tr|Q640H2|Q640H2_XENLA	scp2.L	Acetyl-CoA C-myristoyltransferase OS=Xenopus laevis OX=8355 GN=scp2.L PE=1 SV=1	173	21	C	UR	1608.98	1633.11	5241.83	5642.75	1554.4	1570.62
tr|A0A1L8EWI4|A0A1L8EWI4_XENLA	XELAEV_18044806mg	PACT_coil_coil domain-containing protein OS=Xenopus laevis OX=8355 GN=XELAEV_18044806mg PE=1 SV=1	174	54	C	UR	11056.8	13943.1	3937.79	3632.37	3274.73	3461.43
sp|O42242|NTF2_XENLA	ntf2	Nuclear transport factor 2 OS=Xenopus laevis OX=8355 GN=ntf2 PE=2 SV=1	175	1	C	UR	220.747	260.861	277.135	290.159	390.842	318.474
sp|P15107|SOD1B_XENLA	sod1-b	Superoxide dismutase [Cu-Zn] B OS=Xenopus laevis OX=8355 GN=sod1-b PE=1 SV=3	176	65	C	UR	6034.63	6364.14	6374.94	6549.93	7624.32	8099.91
sp|P13926|SOD1A_XENLA	sod1-a	Superoxide dismutase [Cu-Zn] A OS=Xenopus laevis OX=8355 GN=sod1-a PE=1 SV=2	176	20	C	UR	2766.29	3089.27	3758.06	3337.67	4361.3	4532.24
tr|Q2NLA7|Q2NLA7_XENLA	parp1.L	Poly [ADP-ribose] polymerase OS=Xenopus laevis OX=8355 GN=parp1.L PE=1 SV=1	177	22	C	UR	3212.55	3256.37	3583.14	3192.35	3742.39	3553.11
tr|A0A1L8EN71|A0A1L8EN71_XENLA	myh10.S	Uncharacterized protein OS=Xenopus laevis OX=8355 GN=myh10.S PE=1 SV=1	178	44	C	UR	5799.39	5818.14	5997.96	6206.47	7523.41	7094.04
tr|O93522|O93522_XENLA	myh9.L	Nonmuscle myosin II heavy chain A OS=Xenopus laevis OX=8355 GN=myh9.L PE=1 SV=1	178	123	C	UR	17584.9	17115.2	18837	18634.3	23115.4	21513.7
tr|A0A1L8GGP5|A0A1L8GGP5_XENLA	myh9.S	Uncharacterized protein OS=Xenopus laevis OX=8355 GN=myh9.S PE=1 SV=1	178	43	C	UR	5074.26	5077.72	5509.87	5714.25	6689.79	6334.52
tr|A0A1L8EQ91|A0A1L8EQ91_XENLA	XELAEV_18047510mg	Uncharacterized protein OS=Xenopus laevis OX=8355 GN=XELAEV_18047510mg PE=3 SV=1	178	7	C	UR	451.837	439.128	452.148	425.274	514.422	465.944
tr|A0A1L8FU85|A0A1L8FU85_XENLA	XELAEV_18034144mg	Uncharacterized protein OS=Xenopus laevis OX=8355 GN=XELAEV_18034144mg PE=1 SV=1	179	10	C	UR	1982.39	1559.13	1607.25	1292.92	968.609	925.107
sp|Q91372|DDX4_XENLA	ddx4	Probable ATP-dependent RNA helicase DDX4 OS=Xenopus laevis OX=8355 GN=ddx4 PE=2 SV=1	180	30	C	UR	8448.87	6627.43	3844.75	2943.68	3068.81	2818.47
tr|A0A1L8ENB8|A0A1L8ENB8_XENLA	XELAEV_18046869mg	DEAD box protein 5 OS=Xenopus laevis OX=8355 GN=XELAEV_18046869mg PE=3 SV=1	180	7	C	UR	848.532	996.475	1108.25	913.103	1062.73	1157.56
sp|P24346|DDX3_XENLA	an3	Putative ATP-dependent RNA helicase an3 OS=Xenopus laevis OX=8355 GN=an3 PE=2 SV=1	180	33	C	UR	7951.54	8933.41	4873.91	3269.67	2736.5	2810.93
tr|Q7ZXJ0|Q7ZXJ0_XENLA	ddx3x.L	RNA helicase OS=Xenopus laevis OX=8355 GN=ddx3x.L PE=1 SV=1	180	4	C	UR	1247.5	2275.48	1126.52	645.139	497.164	533.349
tr|Q66JB0|Q66JB0_XENLA	ddx17.L	RNA helicase OS=Xenopus laevis OX=8355 GN=ddx17.L PE=1 SV=1	180	1	C	UR	75.6893	60.2386	60.3385	43.8008	50.1628	48.7382
tr|A0A1L8I390|A0A1L8I390_XENLA	XELAEV_18008520mg	Uncharacterized protein OS=Xenopus laevis OX=8355 GN=XELAEV_18008520mg PE=1 SV=1	181	1	C	UR	40.8548	41.3158	40.5993	44.0274	36.6155	46.7262
tr|A0A1L8EQ71|A0A1L8EQ71_XENLA	smg1.S	Non-specific serine/threonine protein kinase OS=Xenopus laevis OX=8355 GN=smg1.S PE=1 SV=1	182	22	C	UR	5823.36	4650.8	3581.76	2952.16	2452.07	2239.14
tr|A0A1L8EXP0|A0A1L8EXP0_XENLA	XELAEV_18045208mg	Non-specific serine/threonine protein kinase OS=Xenopus laevis OX=8355 GN=XELAEV_18045208mg PE=3 SV=1	182	3	C	UR	210.652	231.125	190.38	178.034	170.896	173.495
tr|Q7SYX2|Q7SYX2_XENLA	serpinb6.L	MGC64421 protein OS=Xenopus laevis OX=8355 GN=serpinb6.L PE=1 SV=1	183	15	C	UR	1406.6	1669.6	1613.36	2033.42	1754.39	2155.4
tr|A0A1L8FWL5|A0A1L8FWL5_XENLA	ulk4.L	Protein kinase domain-containing protein OS=Xenopus laevis OX=8355 GN=ulk4.L PE=1 SV=1	184	5	C	UR	737.847	823.483	848.72	804.01	540.474	550.764
tr|A0A1L8GFV8|A0A1L8GFV8_XENLA	XELAEV_18025187mg	TPR_REGION domain-containing protein OS=Xenopus laevis OX=8355 GN=XELAEV_18025187mg PE=1 SV=1	185	30	C	UR	3608.77	4415.16	5766.12	4939.19	6968.55	7121.69
tr|Q6DDS8|Q6DDS8_XENLA	N1	N1/N2 protein OS=Xenopus laevis OX=8355 GN=N1 PE=2 SV=1	185	3	C	UR	216.894	254.374	339.288	316.268	395.627	403.629
tr|A0A1L8GM46|A0A1L8GM46_XENLA	XELAEV_18023070mg	TPR_REGION domain-containing protein OS=Xenopus laevis OX=8355 GN=XELAEV_18023070mg PE=1 SV=1	185	43	C	UR	5196.3	5971.36	8164.84	7094.86	10052.5	10014.2
sp|Q6NRB9|EMC1_XENLA	emc1	ER membrane protein complex subunit 1 OS=Xenopus laevis OX=8355 GN=emc1 PE=2 SV=1	186	2	C	UR	184.249	128.943	127.448	157.859	162.487	156.497
sp|Q7SYU0|RS8_XENLA	rps8	40S ribosomal protein S8 OS=Xenopus laevis OX=8355 GN=rps8 PE=2 SV=3	187	7	C	UR	767.021	906.434	1105.24	1337.76	1294.38	1278.32
tr|Q6DJI0|Q6DJI0_XENLA	rps8.L	40S ribosomal protein S8 OS=Xenopus laevis OX=8355 GN=rps8.L PE=2 SV=1	187	2	C	UR	145.334	146.797	149.594	167.694	172.357	175.878
tr|Q66KF0|Q66KF0_XENLA	ppp1r13l.L	MGC86497 protein OS=Xenopus laevis OX=8355 GN=ppp1r13l.L PE=2 SV=1	188	3	C	UR	851.867	996.265	409.348	313.238	256.868	258.189
sp|Q3ZM03|RSSA_XENLA	rpsa	40S ribosomal protein SA OS=Xenopus laevis OX=8355 GN=rpsa PE=1 SV=1	189	29	C	UR	3465.49	3550.36	4588.24	3933.11	4971.69	4378.84
tr|Q7ZX07|Q7ZX07_XENLA	rpsa.S	40S ribosomal protein SA OS=Xenopus laevis OX=8355 GN=rpsa.S PE=1 SV=1	189	1	C	UR	14.9234	22.251	38.5204	37.7725	55.2011	54.5988
tr|Q6NTT2|Q6NTT2_XENLA	rps18.L	40S ribosomal protein S18 OS=Xenopus laevis OX=8355 GN=rps18.L PE=1 SV=1	190	7	C	UR	1145.96	1556.45	2251.59	3346.68	2880.66	3477.97
tr|A0A1L8F978|A0A1L8F978_XENLA	ylpm1.L	Uncharacterized protein OS=Xenopus laevis OX=8355 GN=ylpm1.L PE=1 SV=1	191	4	C	UR	926.429	1233	448.072	419.824	345.106	411.003
sp|Q6AZV1|HS90B_XENLA	hsp90ab1	Heat shock cognate protein HSP 90-beta OS=Xenopus laevis OX=8355 GN=hsp90ab1 PE=2 SV=1	192	75	C	UR	21325.5	14955.3	9511.02	9744.71	11383.3	10764
tr|A0A1L8G6W7|A0A1L8G6W7_XENLA	XELAEV_18026411mg	HATPase_c domain-containing protein OS=Xenopus laevis OX=8355 GN=XELAEV_18026411mg PE=1 SV=1	192	13	C	UR	2599.04	2291.54	1706.25	1721.53	1988.43	1901.36
tr|A0A1L8GY66|A0A1L8GY66_XENLA	XELAEV_18017384mg	HATPase_c domain-containing protein OS=Xenopus laevis OX=8355 GN=XELAEV_18017384mg PE=1 SV=1	192	29	C	UR	3520.29	4505.55	4133.91	4685.72	5861	6208.46
tr|Q6PAE3|Q6PAE3_XENLA	hsp90b1.S	MGC68448 protein OS=Xenopus laevis OX=8355 GN=hsp90b1.S PE=2 SV=1	192	6	C	UR	1219.61	1304.27	1094.55	1250.38	1494.5	1574.47
tr|A0A1L8GWP9|A0A1L8GWP9_XENLA	XELAEV_18016856mg	Deacetylase sirtuin-type domain-containing protein OS=Xenopus laevis OX=8355 GN=XELAEV_18016856mg PE=1 SV=1	193	3	C	UR	349.515	316.409	278.166	267.495	216.578	230.397
tr|A0A1L8HKM5|A0A1L8HKM5_XENLA	tacc3.S	TACC_C domain-containing protein OS=Xenopus laevis OX=8355 GN=tacc3.S PE=1 SV=1	194	22	C	UR	3391.43	3408.74	3368.28	2990.81	3160.67	3270.76
tr|A0JMR5|A0JMR5_XENLA	tacc3.L	Tacc3 protein OS=Xenopus laevis OX=8355 GN=tacc3.L PE=2 SV=1	194	8	C	UR	1397.5	1617.14	1435.85	1148.98	1227.91	1250.32
tr|A0A1L8EUK6|A0A1L8EUK6_XENLA	septin9.L	Septin-type G domain-containing protein OS=Xenopus laevis OX=8355 GN=septin9.L PE=3 SV=1	195	3	C	UR	429.869	462.959	405.052	492.021	453.312	526.328
sp|Q5XHH9|TT39B_XENLA	ttc39b	Tetratricopeptide repeat protein 39B OS=Xenopus laevis OX=8355 GN=ttc39b PE=2 SV=1	196	1	C	UR	74.0484	62.0971	65.1987	81.552	75.7568	79.4971
tr|A0A1L8H9M8|A0A1L8H9M8_XENLA	PAN2	PAN2-PAN3 deadenylation complex catalytic subunit PAN2 OS=Xenopus laevis OX=8355 GN=PAN2 PE=1 SV=1	197	4	C	UR	204.71	207.438	213.961	213.053	205.679	214.579
sp|Q00387|EP45_XENLA	serpina6	Serine protease inhibitor A6 OS=Xenopus laevis OX=8355 GN=serpina6 PE=2 SV=2	198	11	C	UR	2678.58	2935.71	2750.31	3053.48	2936.84	3256.07
tr|Q3KPS0|Q3KPS0_XENLA	txndc17.S	Thioredoxin domain-containing protein 17 OS=Xenopus laevis OX=8355 GN=txndc17.S PE=2 SV=1	200	1	C	UR	97.9702	119.045	134.852	148.733	158.513	187.194
tr|Q641D5|Q641D5_XENLA	hat1.L	Histone acetyltransferase type B catalytic subunit OS=Xenopus laevis OX=8355 GN=hat1.L PE=1 SV=1	201	3	C	UR	311.508	403.952	372.987	522.693	423.858	482.091
tr|A0A1L8EPA1|A0A1L8EPA1_XENLA	hat1.S	Histone acetyltransferase type B catalytic subunit OS=Xenopus laevis OX=8355 GN=hat1.S PE=3 SV=1	201	3	C	UR	179.181	183.622	230.217	244.359	252.538	231.98
tr|A0A1L8GLW9|A0A1L8GLW9_XENLA	XELAEV_18022995mg	Uncharacterized protein OS=Xenopus laevis OX=8355 GN=XELAEV_18022995mg PE=3 SV=1	202	27	C	UR	3855.19	4521.91	4972.86	5317.85	5460.22	6240.8
tr|A0A1L8GFG5|A0A1L8GFG5_XENLA	XELAEV_18025130mg	Uncharacterized protein OS=Xenopus laevis OX=8355 GN=XELAEV_18025130mg PE=1 SV=1	202	4	C	UR	692.41	710.702	788.491	884.464	866.622	1062.41
tr|Q6ING0|Q6ING0_XENLA	LOC443576	5-aminoimidazole-4-carboxamide ribonucleotide formyltransferase (Fragment) OS=Xenopus laevis OX=8355 GN=LOC443576 PE=2 SV=1	203	29	C	UR	3528.35	3988.59	4305.74	4839.15	4639.02	5873.78
tr|Q3KQ54|Q3KQ54_XENLA	atic.L	5-aminoimidazole-4-carboxamide ribonucleotide formyltransferase OS=Xenopus laevis OX=8355 GN=atic.L PE=1 SV=1	203	6	C	UR	1151.48	1233.95	1312.93	1407.98	1343.11	1891.01
sp|Q9DDA9|PACN2_XENLA	pacsin2	Protein kinase C and casein kinase substrate in neurons protein 2 OS=Xenopus laevis OX=8355 GN=pacsin2 PE=2 SV=1	204	3	C	UR	246.685	255.828	272.345	253.171	329.139	317.39
tr|A0A1L8GMJ7|A0A1L8GMJ7_XENLA	eps15.L	Uncharacterized protein OS=Xenopus laevis OX=8355 GN=eps15.L PE=1 SV=1	205	34	C	UR	3588.73	3485.04	9060.96	7047.85	1763.82	1859.34
tr|A0A1L8GG06|A0A1L8GG06_XENLA	eps15.S	Uncharacterized protein OS=Xenopus laevis OX=8355 GN=eps15.S PE=4 SV=1	205	8	C	UR	1246.06	1200.81	1944.99	1748.6	867.61	919.413
tr|Q9PTN1|Q9PTN1_XENLA	rps6ka3.L	Ribosomal protein S6 kinase OS=Xenopus laevis OX=8355 GN=rps6ka3.L PE=1 SV=1	206	19	C	UR	5090.17	3623.29	1350.7	1476.19	1517.91	1438.5
sp|P10666|KS6AB_XENLA		Ribosomal protein S6 kinase 2 beta OS=Xenopus laevis OX=8355 PE=2 SV=1	206	5	C	UR	770.035	600.825	366.785	370.302	333.047	346.799
tr|A0A1L8H5X9|A0A1L8H5X9_XENLA	rps6ka3.S	Non-specific serine/threonine protein kinase OS=Xenopus laevis OX=8355 GN=rps6ka3.S PE=3 SV=1	206	2	C	UR	350.565	314.329	176.623	176.835	181.646	175.415
tr|A0A1L8EW60|A0A1L8EW60_XENLA	tlk1.L	Protein kinase domain-containing protein OS=Xenopus laevis OX=8355 GN=tlk1.L PE=1 SV=1	206	8	C	UR	2922.18	2664.51	742.201	701.306	703.425	738.411
sp|P10665|KS6AA_XENLA	rps6ka	Ribosomal protein S6 kinase 2 alpha OS=Xenopus laevis OX=8355 GN=rps6ka PE=1 SV=1	206	9	C	UR	2729.59	2076.69	705.203	771.646	720.449	720.703
sp|Q6NTJ3|GWL_XENLA	mastl	Serine/threonine-protein kinase greatwall OS=Xenopus laevis OX=8355 GN=mastl PE=1 SV=1	206	2	C	UR	916.487	786.32	230.294	268.51	237.24	231.306
tr|Q6PI76|Q6PI76_XENLA	rps14.S	Rps14-prov protein OS=Xenopus laevis OX=8355 GN=rps14.S PE=1 SV=1	207	6	C	UR	627.026	569.208	859.524	976.692	1141.83	1314.74
tr|A0A1L8GK38|A0A1L8GK38_XENLA	XELAEV_18022322mg	Spectrin beta chain OS=Xenopus laevis OX=8355 GN=XELAEV_18022322mg PE=1 SV=1	208	6	C	UR	595.81	482.397	442.226	516.704	568.802	624.868
tr|A0A1L8G5Y2|A0A1L8G5Y2_XENLA	sptbn1.L	Spectrin beta chain OS=Xenopus laevis OX=8355 GN=sptbn1.L PE=3 SV=1	208	27	C	UR	3053.29	2968.69	3272.64	3022.23	4068.41	3706.53
tr|Q6GNJ4|Q6GNJ4_XENLA	LOC443655	Ribonuclease (Fragment) OS=Xenopus laevis OX=8355 GN=LOC443655 PE=2 SV=1	209	5	C	UR	375.23	329.005	352.259	373.239	373.935	406.347
tr|A0A1L8HWC1|A0A1L8HWC1_XENLA	upf1.L	Uncharacterized protein OS=Xenopus laevis OX=8355 GN=upf1.L PE=3 SV=1	210	24	C	UR	3079.36	3245.6	2610.33	2397.59	2118.83	2224.02
tr|Q6PAD3|Q6PAD3_XENLA	psmc4.L	26S proteasome AAA-ATPase subunit RPT3 OS=Xenopus laevis OX=8355 GN=psmc4.L PE=2 SV=1	211	14	C	UR	2055.59	1910.42	2341.82	2484.71	2543.1	2692.58
tr|A0A1L8EL78|A0A1L8EL78_XENLA	psmc5.S	AAA domain-containing protein OS=Xenopus laevis OX=8355 GN=psmc5.S PE=3 SV=1	211	20	C	UR	2851.99	2714.4	2581.68	2671.14	3086.73	2846.26
tr|A0A1L8F9H4|A0A1L8F9H4_XENLA	XELAEV_18039531mg	AAA domain-containing protein OS=Xenopus laevis OX=8355 GN=XELAEV_18039531mg PE=3 SV=1	211	8	C	UR	1343.51	1560.91	1646.34	1752.65	1712.36	1898.9
sp|P46472|PRS7_XENLA	psmc2	26S proteasome regulatory subunit 7 OS=Xenopus laevis OX=8355 GN=psmc2 PE=2 SV=1	211	15	C	UR	2207.35	2166.76	2060.69	2347.06	2195.94	2375.71
tr|A0A1L8HIP9|A0A1L8HIP9_XENLA	krt8.1.L	IF rod domain-containing protein OS=Xenopus laevis OX=8355 GN=krt8.1.L PE=1 SV=1	212	9	C	UR	1909.51	2751.39	1392.7	742.322	715.88	818.531
sp|P08776|K2C8_XENLA		Keratin, type II cytoskeletal 8 OS=Xenopus laevis OX=8355 PE=2 SV=1	212	28	C	UR	5473.37	8295.05	4264.65	2832.89	2517.39	2701.69
sp|Q5XGN1|NUP42_XENLA	nup42	Nucleoporin NUP42 OS=Xenopus laevis OX=8355 GN=nup42 PE=2 SV=2	213	4	C	UR	620.11	655.174	1128.16	821.616	694.212	632.196
tr|A0A1L8GJI4|A0A1L8GJI4_XENLA	XELAEV_18022128mg	Galectin OS=Xenopus laevis OX=8355 GN=XELAEV_18022128mg PE=1 SV=1	214	2	C	UR	142.535	116.008	138.352	135.839	134.268	147.115
tr|A0A1L8F350|A0A1L8F350_XENLA	chm.S	Rab proteins geranylgeranyltransferase component A OS=Xenopus laevis OX=8355 GN=chm.S PE=3 SV=1	215	1	C	UR	234.358	213.615	265.972	269.473	295.124	343.553
tr|A0A1L8GYM8|A0A1L8GYM8_XENLA	XELAEV_18017531mg	TIP120 domain-containing protein OS=Xenopus laevis OX=8355 GN=XELAEV_18017531mg PE=1 SV=1	216	48	C	UR	10847.8	9047.04	6379.57	6383.91	6550.35	6307.4
tr|A0A1L8GUF6|A0A1L8GUF6_XENLA	XELAEV_18021187mg	TIP120 domain-containing protein OS=Xenopus laevis OX=8355 GN=XELAEV_18021187mg PE=1 SV=1	216	3	C	UR	531.996	400.715	309.744	323.587	302.861	327.068
tr|A0A1L8GUR1|A0A1L8GUR1_XENLA	atp2b1.S	Calcium-transporting ATPase OS=Xenopus laevis OX=8355 GN=atp2b1.S PE=1 SV=1	217	16	C	UR	2025.08	1834.49	1960.24	2042.86	2796.56	2645.12
tr|B3VIA2|B3VIA2_XENLA	XELAEV_18017459mg	Calcium-transporting ATPase OS=Xenopus laevis OX=8355 GN=XELAEV_18017459mg PE=2 SV=1	217	1	C	UR	105.165	98.7711	79.6412	111.446	133.407	146.643
tr|A0A1L8H700|A0A1L8H700_XENLA	XELAEV_18014870mg	Calcium-transporting ATPase OS=Xenopus laevis OX=8355 GN=XELAEV_18014870mg PE=1 SV=1	217	1	C	UR	33.1263	28.2093	36.3367	36.1165	60.3283	54.8591
sp|Q9W602|SSRP1_XENLA	ssrp1	FACT complex subunit SSRP1 OS=Xenopus laevis OX=8355 GN=ssrp1 PE=1 SV=1	218	9	C	UR	908.124	910.916	963.547	941.523	975.208	1013.64
tr|A0A1L8F8F3|A0A1L8F8F3_XENLA	XELAEV_18039175mg	Uncharacterized protein (Fragment) OS=Xenopus laevis OX=8355 GN=XELAEV_18039175mg PE=1 SV=1	219	55	C	UR	8437.89	6451.05	10145.8	8790.28	6921.77	5112.39
sp|O57539|NCOA3_XENLA	ncoa3	Nuclear receptor coactivator 3 OS=Xenopus laevis OX=8355 GN=ncoa3 PE=1 SV=1	220	3	C	UR	1093.07	854.641	873.547	696.363	327.501	307.239
sp|A5D8N7|HS7EA_XENLA	hspa14-a	Heat shock 70 kDa protein 14-A OS=Xenopus laevis OX=8355 GN=hspa14-a PE=2 SV=1	221	6	C	UR	630.612	670.294	830.485	781.531	796.007	859.094
sp|A2VD93|HS7EB_XENLA	hspa14-b	Heat shock 70 kDa protein 14-B OS=Xenopus laevis OX=8355 GN=hspa14-b PE=2 SV=1	221	3	C	UR	388.903	420.421	480.205	415.532	479.937	507.356
tr|Q7ZY98|Q7ZY98_XENLA	snd1.L	Staphylococcal nuclease domain-containing protein OS=Xenopus laevis OX=8355 GN=snd1.L PE=1 SV=1	222	34	C	UR	5021.59	4900.52	6174.73	6054.6	6859.52	5758.14
tr|A0A1L8F1G2|A0A1L8F1G2_XENLA	XELAEV_18041630mg	Uncharacterized protein OS=Xenopus laevis OX=8355 GN=XELAEV_18041630mg PE=1 SV=1	223	37	C	UR	5264.49	5166.91	5359.32	5361.03	6729.54	5880.36
sp|Q6PAY8|HSDL2_XENLA	hsdl2	Hydroxysteroid dehydrogenase-like protein 2 OS=Xenopus laevis OX=8355 GN=hsdl2 PE=2 SV=1	224	11	C	UR	747.054	790.182	2249.98	2484.43	798.182	801.657
tr|A0A1L8H5Q1|A0A1L8H5Q1_XENLA	atp6v1a.S	H(+)-transporting two-sector ATPase OS=Xenopus laevis OX=8355 GN=atp6v1a.S PE=3 SV=1	225	30	C	UR	6866.32	6521.4	5744.68	5869.66	6565.41	7039.28
tr|Q4KLX0|Q4KLX0_XENLA	atp6v1a.L	H(+)-transporting two-sector ATPase OS=Xenopus laevis OX=8355 GN=atp6v1a.L PE=2 SV=1	225	4	C	UR	451.825	430.47	450.354	417.074	479.318	436.17
tr|Q7ZY12|Q7ZY12_XENLA	atp6v1al.L	H(+)-transporting two-sector ATPase OS=Xenopus laevis OX=8355 GN=atp6v1al.L PE=1 SV=1	225	3	C	UR	704.029	852.578	433.072	422.681	497.712	591.337
tr|A9UMM7|A9UMM7_XENLA	LOC100137685	H(+)-transporting two-sector ATPase OS=Xenopus laevis OX=8355 GN=LOC100137685 PE=2 SV=1	225	1	C	UR	72.4964	69.2558	64.512	43.2976	71.2253	63.1932
sp|P02385|RL4B_XENLA	rpl4-b	60S ribosomal protein L4-B OS=Xenopus laevis OX=8355 GN=rpl4-b PE=2 SV=2	226	35	C	UR	4211.92	4612.94	6479.08	6133.5	7580.89	6989.66
sp|P08429|RL4A_XENLA	rpl4-a	60S ribosomal protein L4-A OS=Xenopus laevis OX=8355 GN=rpl4-a PE=2 SV=2	226	5	C	UR	447.088	525.907	833.598	842.809	975.339	956.394
tr|A0A1L8F8L1|A0A1L8F8L1_XENLA	XELAEV_18039217mg	Valyl-tRNA synthetase OS=Xenopus laevis OX=8355 GN=XELAEV_18039217mg PE=1 SV=1	227	26	C	UR	3778.71	3238.05	3376.76	3464.37	4303.2	3885.92
tr|A0A1L8F3P6|A0A1L8F3P6_XENLA	XELAEV_18042470mg	Valyl-tRNA synthetase OS=Xenopus laevis OX=8355 GN=XELAEV_18042470mg PE=1 SV=1	227	9	C	UR	1653.35	1890.86	1946.43	2010.59	2614.18	2480.14
tr|A0A1L8HR51|A0A1L8HR51_XENLA	cast.S	Calpain inhibitor OS=Xenopus laevis OX=8355 GN=cast.S PE=1 SV=1	228	3	C	UR	271.54	279.278	366.647	434.434	510.133	580.789
tr|A0A1L8I1N9|A0A1L8I1N9_XENLA	XELAEV_18008054mg	Calpain inhibitor (Fragment) OS=Xenopus laevis OX=8355 GN=XELAEV_18008054mg PE=1 SV=1	228	1	C	UR	81.9215	86.0053	81.6469	82.3522	91.3857	84.4058
sp|Q07254|RS10_XENLA	rps10	40S ribosomal protein S10 OS=Xenopus laevis OX=8355 GN=rps10 PE=1 SV=1	229	9	C	UR	1030.17	1563.39	2162.97	2590.79	2907.84	3233.77
tr|A0A1L8H6M8|A0A1L8H6M8_XENLA	XELAEV_18014822mg	Uncharacterized protein OS=Xenopus laevis OX=8355 GN=XELAEV_18014822mg PE=4 SV=1	229	1	C	UR	133.81	180.528	250.887	341.595	371.527	438.307
tr|A0A1L8HN67|A0A1L8HN67_XENLA	atp5f1d.S	ATP synthase F1 subunit delta OS=Xenopus laevis OX=8355 GN=atp5f1d.S PE=3 SV=1	231	1	C	UR	92.9141	97.7127	87.5933	103.751	112.42	128.599
sp|Q640Z6|NU153_XENLA	nup153	Nuclear pore complex protein Nup153 OS=Xenopus laevis OX=8355 GN=nup153 PE=1 SV=1	232	10	C	UR	1089.41	1277.73	1510.06	1230.86	1199.3	1284.24
tr|A0A1L8FSD4|A0A1L8FSD4_XENLA	nup153.S	Uncharacterized protein OS=Xenopus laevis OX=8355 GN=nup153.S PE=4 SV=1	232	4	C	UR	639.348	759.731	827.058	664.956	732.466	800.829
tr|Q7SZS3|Q7SZS3_XENLA	got2.L	Aspartate aminotransferase OS=Xenopus laevis OX=8355 GN=got2.L PE=2 SV=1	233	6	C	UR	989.366	1172.74	1027.38	1299.59	1232.15	1484.6
tr|A0A1L8GFD3|A0A1L8GFD3_XENLA	got2.S	Aspartate aminotransferase OS=Xenopus laevis OX=8355 GN=got2.S PE=1 SV=1	233	3	C	UR	368.009	297.693	304.696	333.473	324.349	336.389
sp|Q5FWY4|MCM6M_XENLA	mmcm6	Maternal DNA replication licensing factor mcm6 OS=Xenopus laevis OX=8355 GN=mmcm6 PE=1 SV=1	234	22	C	UR	3783.08	4014.67	4139.57	3966.41	4572.79	4633.92
sp|P30664|MCM4B_XENLA	mcm4-b	DNA replication licensing factor mcm4-B OS=Xenopus laevis OX=8355 GN=mcm4-b PE=1 SV=3	234	17	C	UR	2506.24	2497.41	2277.02	2731.38	2606.23	3102.32
sp|P28048|LAA_XENLA	ssb-a	Lupus La protein homolog A OS=Xenopus laevis OX=8355 GN=ssb-a PE=2 SV=1	235	4	C	UR	619.751	682.019	769.067	610.609	924.075	806.823
tr|Q32N81|Q32N81_XENLA	ssb.L	Ssb-b protein OS=Xenopus laevis OX=8355 GN=ssb.L PE=2 SV=1	235	1	C	UR	161.761	224.671	181.198	250.318	273.689	230.246
sp|Q9DEI1|PRKDC_XENLA	prkdc	DNA-dependent protein kinase catalytic subunit OS=Xenopus laevis OX=8355 GN=prkdc PE=2 SV=1	236	13	C	UR	1378.98	1307.09	1997.95	1899	1574.27	1504.79
tr|A0A1L8FJK3|A0A1L8FJK3_XENLA	XELAEV_18034732mg	Uncharacterized protein OS=Xenopus laevis OX=8355 GN=XELAEV_18034732mg PE=1 SV=1	237	30	C	UR	3295.5	3293.68	3089.34	3219.39	4007.56	4172.47
tr|A0A1L8GBQ6|A0A1L8GBQ6_XENLA	atad2b.L	Bromo domain-containing protein OS=Xenopus laevis OX=8355 GN=atad2b.L PE=1 SV=1	238	6	C	UR	640.703	715.339	919.431	790.538	958.169	930.646
tr|A0A1L8FZX9|A0A1L8FZX9_XENLA	XELAEV_18032341mg	Bromo domain-containing protein OS=Xenopus laevis OX=8355 GN=XELAEV_18032341mg PE=1 SV=1	238	1	C	UR	127.584	130.783	119.691	123.563	135.764	147.285
tr|Q6PF20|Q6PF20_XENLA	pcna.S	Proliferating cell nuclear antigen OS=Xenopus laevis OX=8355 GN=pcna.S PE=1 SV=1	239	16	C	UR	4080.5	3896.19	4379.33	4371.84	5663.17	5660.89
tr|Q9I893|Q9I893_XENLA	pcna.L	Proliferating cell nuclear antigen OS=Xenopus laevis OX=8355 GN=pcna.L PE=2 SV=1	239	1	C	UR	104.513	140.799	162.248	163.976	181.851	220.151
tr|A0A1L8HK01|A0A1L8HK01_XENLA	XELAEV_18014073mg	Uncharacterized protein OS=Xenopus laevis OX=8355 GN=XELAEV_18014073mg PE=1 SV=1	240	35	C	UR	10616.5	7673.87	5154.99	5613.1	5520.22	4433.1
tr|A0A1L8G704|A0A1L8G704_XENLA	XELAEV_18026429mg	Uncharacterized protein OS=Xenopus laevis OX=8355 GN=XELAEV_18026429mg PE=1 SV=1	241	18	C	UR	1543.24	2277.19	1942.4	1753.36	2228.8	3337.36
tr|Q6GPQ2|Q6GPQ2_XENLA	hsph1.L	Heat shock 110 kDa protein OS=Xenopus laevis OX=8355 GN=hsph1.L PE=2 SV=1	242	3	C	UR	225.506	211.562	176.228	171.433	201.043	222.25
tr|A0A1L8HAI7|A0A1L8HAI7_XENLA	XELAEV_18016180mg	Heat shock 110 kDa protein OS=Xenopus laevis OX=8355 GN=XELAEV_18016180mg PE=1 SV=1	242	8	C	UR	887.15	1045.13	927.875	977.09	1022.23	1099.54
tr|A0A1L8G8S4|A0A1L8G8S4_XENLA	marcks.L	Uncharacterized protein OS=Xenopus laevis OX=8355 GN=marcks.L PE=1 SV=1	243	3	C	UR	296.42	280.905	271.94	353.431	401.992	501.701
sp|Q6NU04|TDRD7_XENLA	tdrd7	Tudor domain-containing protein 7 OS=Xenopus laevis OX=8355 GN=tdrd7 PE=2 SV=1	244	6	C	UR	505.12	463.917	348.144	349.85	344.057	351.221
sp|Q6GM14|DBNLB_XENLA	dbnl-b	Drebrin-like protein B OS=Xenopus laevis OX=8355 GN=dbnl-b PE=2 SV=1	245	4	C	UR	489.759	524.13	521.335	774.351	767.074	816.212
sp|O73932|IF23A_XENLA	igf2bp3-a	Insulin-like growth factor 2 mRNA-binding protein 3-A OS=Xenopus laevis OX=8355 GN=igf2bp3-a PE=1 SV=1	246	20	C	UR	2123.79	3262.88	3663.63	4570.6	3518.42	5222.67
sp|O57526|IF23B_XENLA	igf2bp3-b	Insulin-like growth factor 2 mRNA-binding protein 3-B OS=Xenopus laevis OX=8355 GN=igf2bp3-b PE=1 SV=1	246	1	C	UR	26.5521	44.5294	51.5953	64.9653	44.6441	81.8765
tr|Q7SZ08|Q7SZ08_XENLA	atp6v1e1.L	MGC64332 protein OS=Xenopus laevis OX=8355 GN=atp6v1e1.L PE=2 SV=1	247	4	C	UR	496.149	462.443	472.248	619.481	520.444	684.166
tr|Q66KY6|Q66KY6_XENLA	rpl11.S	60S ribosomal protein L11 OS=Xenopus laevis OX=8355 GN=rpl11.S PE=1 SV=1	248	10	C	UR	702.95	942.43	1350.59	1707.86	1759.61	1886.27
tr|A0A1L8GEV4|A0A1L8GEV4_XENLA	usp10.S	Ubiquitin carboxyl-terminal hydrolase OS=Xenopus laevis OX=8355 GN=usp10.S PE=1 SV=1	249	8	C	UR	559.647	729.774	926.247	759.559	973.79	929.206
sp|Q7ZXR7|UB10B_XENLA	usp10-b	Ubiquitin carboxyl-terminal hydrolase 10-B OS=Xenopus laevis OX=8355 GN=usp10-b PE=2 SV=1	249	14	C	UR	1244.52	1319.69	1433.28	1451.16	1474.08	1598.52
tr|Q6GNU6|Q6GNU6_XENLA	apaf1.L	Apoptotic protease-activating factor 1 OS=Xenopus laevis OX=8355 GN=apaf1.L PE=2 SV=1	251	9	C	UR	1063.04	1285.07	1288.1	1274.41	1575.4	1476.62
tr|A0A1L8GYE5|A0A1L8GYE5_XENLA	XELAEV_18017449mg	CEP209_CC5 domain-containing protein OS=Xenopus laevis OX=8355 GN=XELAEV_18017449mg PE=1 SV=1	252	4	C	UR	266.516	278.491	506.015	731.782	273.496	282.584
tr|B1H1N8|B1H1N8_XENLA	vat1.S	LOC100036826 protein OS=Xenopus laevis OX=8355 GN=vat1.S PE=2 SV=1	253	9	C	UR	1062.03	1085.82	1158.98	1431.45	1308.82	1553.61
tr|A0A1L8FIG2|A0A1L8FIG2_XENLA	tpi1.L	Triosephosphate isomerase OS=Xenopus laevis OX=8355 GN=tpi1.L PE=1 SV=1	255	21	C	UR	3259.37	3301.02	3481.87	3715.25	3803.75	4108.66
sp|Q7ZWN5|TPIS_XENLA	tpi1	Triosephosphate isomerase OS=Xenopus laevis OX=8355 GN=tpi1 PE=2 SV=1	255	28	C	UR	3655.99	4243.32	4516.22	5330.26	5633.89	6458.94
sp|Q91785|KI15A_XENLA	kif15-a	Kinesin-like protein KIF15-A OS=Xenopus laevis OX=8355 GN=kif15-a PE=1 SV=1	256	10	C	UR	1390.83	1419.49	1393.07	1447.21	1650.83	1710.31
sp|Q498L9|KI15B_XENLA	kif15-b	Kinesin-like protein KIF15-B OS=Xenopus laevis OX=8355 GN=kif15-b PE=1 SV=1	256	5	C	UR	376.885	419.263	412.307	450.51	489.168	550.793
tr|A0A1L8FWL3|A0A1L8FWL3_XENLA	XELAEV_18031144mg	Kinesin motor domain-containing protein OS=Xenopus laevis OX=8355 GN=XELAEV_18031144mg PE=1 SV=1	256	1	C	UR	69.5733	54.0354	58.9307	63.2355	56.8092	69.6025
tr|A0A1L8GM39|A0A1L8GM39_XENLA	XELAEV_18023077mg	Uroporphyrinogen decarboxylase OS=Xenopus laevis OX=8355 GN=XELAEV_18023077mg PE=1 SV=1	257	7	C	UR	684.643	619	570.091	678.348	666.96	740.192
tr|Q6NTR0|Q6NTR0_XENLA	urod.S	Uroporphyrinogen decarboxylase OS=Xenopus laevis OX=8355 GN=urod.S PE=2 SV=1	257	2	C	UR	172.615	196.608	162.87	205.762	199.571	222.469
tr|A0A1L8F1S1|A0A1L8F1S1_XENLA	XELAEV_18041763mg	Uncharacterized protein OS=Xenopus laevis OX=8355 GN=XELAEV_18041763mg PE=1 SV=1	258	123	C	UR	20581.5	20914.9	23624.1	18827.3	27296.9	23790.3
tr|A0A310UE08|A0A310UE08_XENLA	flnb.L	Uncharacterized protein OS=Xenopus laevis OX=8355 GN=flnb.L PE=1 SV=1	258	49	C	UR	5483.23	5670.52	6047.36	5453.73	6941.58	6823.56
sp|Q92122|KPYM_XENLA	pkm	Pyruvate kinase PKM OS=Xenopus laevis OX=8355 GN=pkm PE=2 SV=1	259	86	C	UR	10207.3	9271.27	9679.84	10983.8	10727.4	12133.7
tr|Q7ZY25|Q7ZY25_XENLA	pkm.L	Pyruvate kinase OS=Xenopus laevis OX=8355 GN=pkm.L PE=2 SV=1	259	40	C	UR	3377.97	2923.63	3215.73	3536.14	3734.83	4130.33
tr|A0A1L8H000|A0A1L8H000_XENLA	pkm.L	Pyruvate kinase OS=Xenopus laevis OX=8355 GN=pkm.L PE=1 SV=1	259	8	C	UR	516.614	404.266	405.42	468.152	456.905	493.05
tr|A0A1L8FDJ9|A0A1L8FDJ9_XENLA	XELAEV_18040950mg	Pyruvate kinase OS=Xenopus laevis OX=8355 GN=XELAEV_18040950mg PE=1 SV=1	259	11	C	UR	1205.07	1306.42	1245.84	1258.23	1328.26	1500.39
tr|A0A1L8F5D2|A0A1L8F5D2_XENLA	pklr.S	Pyruvate kinase OS=Xenopus laevis OX=8355 GN=pklr.S PE=3 SV=1	259	7	C	UR	793.425	839.422	953.48	917	1101.79	1208.89
tr|A0A1L8FQ77|A0A1L8FQ77_XENLA	XELAEV_18032654mg	Uncharacterized protein (Fragment) OS=Xenopus laevis OX=8355 GN=XELAEV_18032654mg PE=4 SV=1	259	2	C	UR	113.391	119.477	105.633	123.358	132.245	139.776
tr|Q642N9|Q642N9_XENLA	tars1.L	Threonyl-tRNA synthetase OS=Xenopus laevis OX=8355 GN=tars1.L PE=2 SV=1	260	12	C	UR	1719.71	1884.79	1664.37	2057.47	2034.49	2059.38
tr|A0A1L8GT29|A0A1L8GT29_XENLA	XELAEV_18020690mg	Threonyl-tRNA synthetase OS=Xenopus laevis OX=8355 GN=XELAEV_18020690mg PE=1 SV=1	260	1	C	UR	505.685	460.774	388.805	501.453	478.873	453.448
tr|A0A1L8GN27|A0A1L8GN27_XENLA	XELAEV_18023422mg	RNA 3'-terminal phosphate cyclase OS=Xenopus laevis OX=8355 GN=XELAEV_18023422mg PE=1 SV=1	262	7	C	UR	727.968	1227.26	1526.61	1072.17	1288.38	1317.26
tr|Q6GMF0|Q6GMF0_XENLA	aldh18a1.L	Delta-1-pyrroline-5-carboxylate synthase OS=Xenopus laevis OX=8355 GN=aldh18a1.L PE=1 SV=1	263	5	C	UR	471.913	377.238	392.589	368.397	277.043	317.67
sp|Q6AX45|VPS25_XENLA	vps25	Vacuolar protein-sorting-associated protein 25 OS=Xenopus laevis OX=8355 GN=vps25 PE=2 SV=1	264	1	C	UR	44.8487	55.0262	37.1734	56.6637	50.0961	45.5204
tr|A0A1L8I078|A0A1L8I078_XENLA	cit.L	Citron Rho-interacting kinase OS=Xenopus laevis OX=8355 GN=cit.L PE=1 SV=1	265	10	C	UR	2139.19	2065.72	946.72	896.697	799.481	858.928
sp|P08515|GST26_SCHJA		Glutathione S-transferase class-mu 26 kDa isozyme OS=Schistosoma japonicum PE=1 SV=3	266	161	C	UR	27399.5	17995.3	14529.4	16018.3	19258.4	16929.5
sp|Q6PCJ1|DCTN1_XENLA	dctn1	Dynactin subunit 1 OS=Xenopus laevis OX=8355 GN=dctn1 PE=2 SV=1	267	28	C	UR	3765.36	3852.7	3695.75	2966.69	3739.55	3537.6
tr|A0A1L8GBX1|A0A1L8GBX1_XENLA	XELAEV_18028151mg	Uncharacterized protein OS=Xenopus laevis OX=8355 GN=XELAEV_18028151mg PE=1 SV=1	268	20	C	UR	3535.72	3042.16	2714.27	2521.99	3130.06	2930.34
tr|A0A1L8FV28|A0A1L8FV28_XENLA	XELAEV_18030627mg	Uncharacterized protein OS=Xenopus laevis OX=8355 GN=XELAEV_18030627mg PE=1 SV=1	269	21	C	UR	1069.72	1078.31	6819.95	6206.04	794.36	932.599
tr|A0A1L8H7P1|A0A1L8H7P1_XENLA	sfpq.S	Uncharacterized protein OS=Xenopus laevis OX=8355 GN=sfpq.S PE=4 SV=1	272	23	C	UR	8568.98	6661.32	4139.2	3279.33	2199.1	2035.67
tr|A0A1L8HFF9|A0A1L8HFF9_XENLA	sfpq.L	Uncharacterized protein OS=Xenopus laevis OX=8355 GN=sfpq.L PE=1 SV=1	272	4	C	UR	381.848	328.697	270.095	245.95	245.786	233.948
tr|Q7ZX79|Q7ZX79_XENLA	nono.L	p54nrb protein OS=Xenopus laevis OX=8355 GN=nono.L PE=1 SV=1	272	16	C	UR	3264.41	2803.61	1612.77	1572.04	1284.43	1218.73
tr|A0A1L8HJ71|A0A1L8HJ71_XENLA	XELAEV_18013799mg	Uncharacterized protein OS=Xenopus laevis OX=8355 GN=XELAEV_18013799mg PE=1 SV=1	272	2	C	UR	593.615	432.047	260.736	285.019	263.368	202.452
tr|A0A1L8FE48|A0A1L8FE48_XENLA	XELAEV_18036795mg	Uncharacterized protein OS=Xenopus laevis OX=8355 GN=XELAEV_18036795mg PE=4 SV=1	273	2	C	UR	230.818	338.778	268.484	240.005	265.75	290.306
tr|A0A1L8GPA5|A0A1L8GPA5_XENLA	XELAEV_18023800mg	Ubiquitin carboxyl-terminal hydrolase OS=Xenopus laevis OX=8355 GN=XELAEV_18023800mg PE=3 SV=1	274	6	C	UR	956.264	1047.93	1073.92	997.932	1123.32	1142.91
sp|Q9PUL2|KTNA1_XENLA	katna1	Katanin p60 ATPase-containing subunit A1 (Fragment) OS=Xenopus laevis OX=8355 GN=katna1 PE=2 SV=1	275	19	C	UR	6835.01	7061.33	1562.52	1638.79	1617.18	1578.2
tr|A0A1L8HIY6|A0A1L8HIY6_XENLA	katnal1.L	Multifunctional fusion protein OS=Xenopus laevis OX=8355 GN=katnal1.L PE=3 SV=1	275	4	C	UR	883.248	776.637	272.893	305.422	271.345	314.22
tr|A0A1L8FU36|A0A1L8FU36_XENLA	naprt.S	Nicotinate phosphoribosyltransferase OS=Xenopus laevis OX=8355 GN=naprt.S PE=1 SV=1	276	1	C	UR	48.6784	42.7852	40.1491	71.2084	59.8587	55.3593
sp|P47835|RS32_XENLA	rps3-b	40S ribosomal protein S3-B OS=Xenopus laevis OX=8355 GN=rps3-b PE=2 SV=1	277	15	C	UR	1465.87	1950.3	2591.65	2829.26	2597.8	2914.27
tr|A0A1L8ESB3|A0A1L8ESB3_XENLA	psmd11.L	PCI domain-containing protein OS=Xenopus laevis OX=8355 GN=psmd11.L PE=1 SV=1	278	17	C	UR	2213.57	2035.66	2141.84	2023.43	2217.55	1871.39
tr|A0A1L8EL57|A0A1L8EL57_XENLA	psmd11.S	PCI domain-containing protein OS=Xenopus laevis OX=8355 GN=psmd11.S PE=3 SV=1	278	3	C	UR	274.108	281.465	497.919	544.601	622.931	524.456
tr|Q6NTT1|Q6NTT1_XENLA	LOC398508	LOC398508 protein (Fragment) OS=Xenopus laevis OX=8355 GN=LOC398508 PE=2 SV=1	279	32	C	UR	4164.18	4286.29	4653.08	5451.81	5092.47	6180.66
tr|Q642S3|Q642S3_XENLA	tubgcp4.L	Gamma-tubulin complex component OS=Xenopus laevis OX=8355 GN=tubgcp4.L PE=1 SV=1	280	14	C	UR	2070.2	1769.27	1273.86	1416.52	764.949	810.513
tr|A0A1L8GSP7|A0A1L8GSP7_XENLA	tubgcp4.S	Gamma-tubulin complex component OS=Xenopus laevis OX=8355 GN=tubgcp4.S PE=3 SV=1	280	3	C	UR	282.444	205.43	156.106	180.598	125.524	129.741
tr|A0A1L8FAD2|A0A1L8FAD2_XENLA	XELAEV_18039843mg	Rib_recp_KP_reg domain-containing protein OS=Xenopus laevis OX=8355 GN=XELAEV_18039843mg PE=1 SV=1	282	3	C	UR	887.662	850.463	783.009	790.082	1066.2	1241.03
tr|A1L2V6|A1L2V6_XENLA	tyms.L	Thymidylate synthase OS=Xenopus laevis OX=8355 GN=tyms.L PE=1 SV=1	283	4	C	UR	444.977	459.122	642.549	579.406	793.698	672.158
tr|A0A1L8HZY6|A0A1L8HZY6_XENLA	XELAEV_18007461mg	Coronin OS=Xenopus laevis OX=8355 GN=XELAEV_18007461mg PE=1 SV=1	284	7	C	UR	1950.56	2416.67	1264.98	989.912	1709.51	1760.29
tr|Q9PWG8|Q9PWG8_XENLA	coro1c.S	Coronin OS=Xenopus laevis OX=8355 GN=coro1c.S PE=1 SV=1	284	5	C	UR	1037.29	1281.22	617.842	492.01	776.216	817.776
tr|A0A1L8EVW6|A0A1L8EVW6_XENLA	stam2.L	Uncharacterized protein OS=Xenopus laevis OX=8355 GN=stam2.L PE=1 SV=1	285	3	C	UR	412.649	338.393	372.522	360.801	416.988	435.307
tr|Q9W7I1|Q9W7I1_XENLA	RACK1	Activated protein kinase C receptor OS=Xenopus laevis OX=8355 GN=RACK1 PE=2 SV=1	286	35	C	UR	3154.38	3429.78	4772.01	4891.73	5604.02	5546.01
sp|P45441|YBX2B_XENLA	ybx2-b	Y-box-binding protein 2-B OS=Xenopus laevis OX=8355 GN=ybx2-b PE=1 SV=2	287	6	C	UR	1264.93	1340.71	1541.34	1468.08	1907.68	2004.51
sp|P21574|YBX2A_XENLA	ybx2-a	Y-box-binding protein 2-A OS=Xenopus laevis OX=8355 GN=ybx2-a PE=1 SV=3	287	10	C	UR	1396.16	1315.52	1588.17	1452.91	1936.58	1826.02
sp|Q6PI53|MED24_XENLA	med24	Mediator of RNA polymerase II transcription subunit 24 OS=Xenopus laevis OX=8355 GN=med24 PE=2 SV=1	288	2	C	UR	476.851	516.656	506.756	497.062	315.89	290.65
sp|Q6DCQ8|P4K2B_XENLA	pi4k2b	Phosphatidylinositol 4-kinase type 2-beta OS=Xenopus laevis OX=8355 GN=pi4k2b PE=2 SV=1	289	5	C	UR	332.348	333.415	317.866	319.558	420.025	434.142
tr|A0A1L8HM43|A0A1L8HM43_XENLA	XELAEV_18009401mg	Inorganic diphosphatase OS=Xenopus laevis OX=8355 GN=XELAEV_18009401mg PE=3 SV=1	290	6	C	UR	855.3	1050.73	1055.09	1315	1353.18	1565.98
tr|A0A1L8HUY4|A0A1L8HUY4_XENLA	ppa1.L	Inorganic diphosphatase OS=Xenopus laevis OX=8355 GN=ppa1.L PE=1 SV=1	290	3	C	UR	386.81	441.824	544.154	557.242	565.595	631.371
sp|Q9DE14|ATR_XENLA	atr	Serine/threonine-protein kinase atr OS=Xenopus laevis OX=8355 GN=atr PE=1 SV=2	291	65	C	UR	9876.08	9902.17	13123	11018.1	7796.74	6606.13
tr|A0A1L8G1U5|A0A1L8G1U5_XENLA	sec23a.S	Protein transport protein SEC23 OS=Xenopus laevis OX=8355 GN=sec23a.S PE=1 SV=1	292	14	C	UR	1331.59	1223.26	2293.33	2164.74	2362.77	1878.34
tr|A0A1L8F457|A0A1L8F457_XENLA	XELAEV_18042639mg	Protein transport protein SEC23 OS=Xenopus laevis OX=8355 GN=XELAEV_18042639mg PE=3 SV=1	292	9	C	UR	889.727	724.872	1549.37	1482.53	1641.63	1375.09
tr|A0A1L8G7U0|A0A1L8G7U0_XENLA	XELAEV_18026612mg	Protein transport protein SEC23 OS=Xenopus laevis OX=8355 GN=XELAEV_18026612mg PE=1 SV=1	292	8	C	UR	672.613	585.326	993.05	956.474	1067.83	907.651
tr|Q642R8|Q642R8_XENLA	pold1.L	DNA polymerase OS=Xenopus laevis OX=8355 GN=pold1.L PE=2 SV=1	293	12	C	UR	2031.06	2038.04	1774.23	1792.82	1302.43	1452.81
tr|A4VCE9|A4VCE9_XENLA	nsf.L	Vesicle-fusing ATPase OS=Xenopus laevis OX=8355 GN=nsf.L PE=2 SV=1	295	6	C	UR	724.791	1065.06	1204.89	1096.46	1079.83	984.485
tr|Q0PF19|Q0PF19_XENLA	nsf.S	Vesicle-fusing ATPase OS=Xenopus laevis OX=8355 GN=nsf.S PE=2 SV=1	295	10	C	UR	894.344	1364.69	1447.06	1440.2	1211.03	1526.7
tr|Q6DE35|Q6DE35_XENLA	aar2.L	AAR2 splicing factor homolog OS=Xenopus laevis OX=8355 GN=aar2.L PE=2 SV=1	296	2	C	UR	304.794	320.169	274.251	331.201	291.314	342.311
sp|Q4FZW5|SEH1A_XENLA	seh1l-a	Nucleoporin SEH1-A OS=Xenopus laevis OX=8355 GN=seh1l-a PE=2 SV=1	297	11	C	UR	2731.51	2234.17	1541.38	1586.51	1711.75	1517.07
tr|A0A1L8GQ11|A0A1L8GQ11_XENLA	uba3.L	NEDD8-activating enzyme E1 catalytic subunit OS=Xenopus laevis OX=8355 GN=uba3.L PE=1 SV=1	298	4	C	UR	515.874	457.066	438.267	482.24	470.849	516.251
sp|Q642Q1|SAE2A_XENLA	uba2-a	SUMO-activating enzyme subunit 2-A OS=Xenopus laevis OX=8355 GN=uba2-a PE=2 SV=1	298	9	C	UR	1247.59	1291.34	1473.19	1326.22	1487.98	1672.47
tr|A0A1L8HVI7|A0A1L8HVI7_XENLA	XELAEV_18005901mg	UBA_e1_C domain-containing protein OS=Xenopus laevis OX=8355 GN=XELAEV_18005901mg PE=1 SV=1	298	26	C	UR	3173.04	3438.3	3708.98	3868.33	4440.23	4661.3
tr|Q7ZY51|Q7ZY51_XENLA	MGC64293	Profilin (Fragment) OS=Xenopus laevis OX=8355 GN=MGC64293 PE=2 SV=1	299	18	C	UR	2229.89	1987.87	2362.85	2651.07	1928.75	2026.49
tr|Q3KQ82|Q3KQ82_XENLA	pfn1.L	Profilin OS=Xenopus laevis OX=8355 GN=pfn1.L PE=1 SV=1	299	9	C	UR	840.294	758.782	839.161	942.197	903.565	1014.23
tr|A0A1L8GLL3|A0A1L8GLL3_XENLA	sf3b3.L	Uncharacterized protein OS=Xenopus laevis OX=8355 GN=sf3b3.L PE=1 SV=1	300	16	C	UR	2970.5	2546.67	2226.1	2276.72	2627.47	2522.89
tr|A0A1L8HTP8|A0A1L8HTP8_XENLA	fam114a1.L	Uncharacterized protein OS=Xenopus laevis OX=8355 GN=fam114a1.L PE=1 SV=1	301	3	C	UR	156.422	210.517	235.851	228.552	273.065	269.938
tr|A0A1L8GR03|A0A1L8GR03_XENLA	fam114a2.S	Uncharacterized protein OS=Xenopus laevis OX=8355 GN=fam114a2.S PE=3 SV=1	301	1	C	UR	76.8308	90.2676	87.2625	72.5647	94.2078	93.0374
sp|Q8AVM7|BZW1_XENLA	bzw1	Basic leucine zipper and W2 domain-containing protein 1 OS=Xenopus laevis OX=8355 GN=bzw1 PE=2 SV=1	302	10	C	UR	1451.55	1518.03	1276.81	1451.41	1540.74	1278.09
sp|Q7ZYV9|SYMPK_XENLA	sympk	Symplekin OS=Xenopus laevis OX=8355 GN=sympk PE=1 SV=1	303	27	C	UR	2760.87	3141.37	6788.16	6421.42	2202.98	2183.25
tr|A0A1L8H8D7|A0A1L8H8D7_XENLA	XELAEV_18015426mg	Uncharacterized protein OS=Xenopus laevis OX=8355 GN=XELAEV_18015426mg PE=4 SV=1	304	37	C	UR	5147.93	7752.99	10190.2	8608.53	3094.5	3007.32
tr|A0A1L8HGF2|A0A1L8HGF2_XENLA	nf1.L	Uncharacterized protein OS=Xenopus laevis OX=8355 GN=nf1.L PE=1 SV=1	304	4	C	UR	751.819	1125.04	1469.97	1255.57	461.697	472.008
sp|Q9PTM5|KCAB2_XENLA	kcnab2	Voltage-gated potassium channel subunit beta-2 OS=Xenopus laevis OX=8355 GN=kcnab2 PE=2 SV=1	305	3	C	UR	268.879	283.13	453.562	518.75	586.423	478.274
sp|Q9PT63|CKAP5_XENLA	ckap5-a	Cytoskeleton-associated protein 5-A OS=Xenopus laevis OX=8355 GN=ckap5-a PE=1 SV=1	306	20	C	UR	1970.72	3204.94	3696.22	2831.12	1581.73	1730.49
tr|A0A1L8GIT7|A0A1L8GIT7_XENLA	ckap5.L	Uncharacterized protein OS=Xenopus laevis OX=8355 GN=ckap5.L PE=1 SV=1	306	1	C	UR	47.8918	114.949	155.492	116.468	65.5972	74.1626
tr|A0A1L8GDM4|A0A1L8GDM4_XENLA	ckap5.S	Uncharacterized protein OS=Xenopus laevis OX=8355 GN=ckap5.S PE=1 SV=1	306	5	C	UR	330.877	565.22	573.032	483.454	344.575	396.339
tr|A0A1L8GXE6|A0A1L8GXE6_XENLA	XELAEV_18017113mg	ANK_REP_REGION domain-containing protein OS=Xenopus laevis OX=8355 GN=XELAEV_18017113mg PE=4 SV=1	307	2	C	UR	214.748	260.355	203.045	163.677	143.551	174.968
tr|A0A1L8FAF2|A0A1L8FAF2_XENLA	ubr1.L	E3 ubiquitin-protein ligase OS=Xenopus laevis OX=8355 GN=ubr1.L PE=1 SV=1	308	19	C	UR	4867.33	3642.2	1909.7	1706.79	2029.65	1647.42
tr|A0A310U2H2|A0A310U2H2_XENLA	XELAEV_18000429mg	CCT-epsilon OS=Xenopus laevis OX=8355 GN=XELAEV_18000429mg PE=1 SV=1	309	25	C	UR	4236.78	4926.19	4169.79	4756.5	4217.54	4370.96
tr|Q7ZTM0|Q7ZTM0_XENLA	cct5.S	CCT-epsilon OS=Xenopus laevis OX=8355 GN=cct5.S PE=2 SV=1	309	8	C	UR	944.841	899.188	785.863	889.449	820.59	909.754
tr|Q5XGW4|Q5XGW4_XENLA	cct4.S	T-complex protein 1 subunit delta OS=Xenopus laevis OX=8355 GN=cct4.S PE=1 SV=1	309	19	C	UR	4397.76	4619.61	4046.73	3897.12	3091.65	4093.06
tr|Q6GN66|Q6GN66_XENLA	cct4.L	T-complex protein 1 subunit delta OS=Xenopus laevis OX=8355 GN=cct4.L PE=2 SV=1	309	12	C	UR	2680.33	2549.65	2515.34	2450.78	2037.33	2712.48
tr|Q7ZWW0|Q7ZWW0_XENLA	LOC398498	LOC398498 protein (Fragment) OS=Xenopus laevis OX=8355 GN=LOC398498 PE=2 SV=1	309	2	C	UR	234.84	235.32	126.808	115.321	98.2853	114.652
sp|Q6DCH7|SBP1B_XENLA	selenbp1-b	Methanethiol oxidase OS=Xenopus laevis OX=8355 GN=selenbp1-b PE=2 SV=1	310	6	C	UR	736.823	801.935	883.618	825.89	1003.48	1015.41
sp|Q52KZ7|SBP1A_XENLA	selenbp1-a	Methanethiol oxidase OS=Xenopus laevis OX=8355 GN=selenbp1-a PE=2 SV=1	310	1	C	UR	47.5505	60.5108	52.4682	49.8316	75.6938	83.0008
tr|A0A1L8HFS5|A0A1L8HFS5_XENLA	yars1.L	Tyrosine--tRNA ligase OS=Xenopus laevis OX=8355 GN=yars1.L PE=1 SV=1	311	1	C	UR	128.421	120.829	99.1917	114.85	124.227	134.593
sp|Q7ZX51|SYYC_XENLA	yars1	Tyrosine--tRNA ligase, cytoplasmic OS=Xenopus laevis OX=8355 GN=yars1 PE=2 SV=1	311	9	C	UR	1137.76	1132.86	1218.86	1297.01	1308.19	1435.97
sp|Q7ZWM6|OLA1_XENLA	ola1	Obg-like ATPase 1 OS=Xenopus laevis OX=8355 GN=ola1 PE=2 SV=1	312	8	C	UR	979.97	1040.53	1045.73	1353.13	1193.17	1460.45
tr|Q5U5A8|Q5U5A8_XENLA	acly.L	ATP-citrate synthase OS=Xenopus laevis OX=8355 GN=acly.L PE=2 SV=1	313	13	C	UR	1316.59	1568.76	1908.29	1979.72	2135.94	1985.63
tr|A0A1L8EKL2|A0A1L8EKL2_XENLA	acly.S	ATP-citrate synthase OS=Xenopus laevis OX=8355 GN=acly.S PE=1 SV=1	313	50	C	UR	7624.57	7087.89	8437.36	8114.96	8794.43	8015.46
tr|A0A1L8HSA2|A0A1L8HSA2_XENLA	XELAEV_18011173mg	Transitional endoplasmic reticulum ATPase OS=Xenopus laevis OX=8355 GN=XELAEV_18011173mg PE=1 SV=1	314	65	C	UR	10283.9	9587.11	7988.76	9174.22	9973.09	10358
tr|A0A1L8I3S6|A0A1L8I3S6_XENLA	XELAEV_18008548mg	Transitional endoplasmic reticulum ATPase OS=Xenopus laevis OX=8355 GN=XELAEV_18008548mg PE=1 SV=1	314	4	C	UR	388.45	361.732	321.655	364.885	403.477	397.795
tr|A0A1L8GJV0|A0A1L8GJV0_XENLA	XELAEV_18022257mg	Uncharacterized protein OS=Xenopus laevis OX=8355 GN=XELAEV_18022257mg PE=1 SV=1	315	12	C	UR	2142.97	2281.23	2095.4	2359.57	2700.16	3037.36
tr|A0A1L8GD86|A0A1L8GD86_XENLA	XELAEV_18024202mg	Uncharacterized protein OS=Xenopus laevis OX=8355 GN=XELAEV_18024202mg PE=1 SV=1	315	5	C	UR	458.523	408.89	373.933	440.283	422.273	468.553
tr|A0A1L8EKP4|A0A1L8EKP4_XENLA	npepps.S	Aminopeptidase OS=Xenopus laevis OX=8355 GN=npepps.S PE=1 SV=1	316	5	C	UR	662.949	715.222	740.058	765.755	835.822	857.949
tr|A0A1L8ERY9|A0A1L8ERY9_XENLA	npepps.L	Aminopeptidase OS=Xenopus laevis OX=8355 GN=npepps.L PE=1 SV=1	316	37	C	UR	5806.26	6033.38	5785.4	6139.34	6800.9	7216.14
tr|Q7ZXR5|Q7ZXR5_XENLA	Pa2g4	Pa2g4 protein (Fragment) OS=Xenopus laevis OX=8355 GN=Pa2g4 PE=2 SV=1	317	12	C	UR	1261.77	1623.86	2055.44	2257.73	2462.15	2439.31
tr|Q6GNV0|Q6GNV0_XENLA	pa2g4.L	MGC80858 protein OS=Xenopus laevis OX=8355 GN=pa2g4.L PE=2 SV=1	317	3	C	UR	233.803	285.427	297.065	416.981	360.893	415.416
tr|Q9PVZ2|Q9PVZ2_XENLA	nup214.L	Nucleoporin CAN OS=Xenopus laevis OX=8355 GN=nup214.L PE=2 SV=1	318	26	C	UR	5166.47	4778.59	3777.09	2892.24	2426.9	2539.13
tr|A0A310TNA8|A0A310TNA8_XENLA	XELAEV_18000373mg	Uncharacterized protein (Fragment) OS=Xenopus laevis OX=8355 GN=XELAEV_18000373mg PE=1 SV=1	318	1	C	UR	36.1119	51.2584	39.9512	38.4219	35.2184	37.646
tr|Q6NTQ5|Q6NTQ5_XENLA	tcp1.S	CCT-alpha OS=Xenopus laevis OX=8355 GN=tcp1.S PE=2 SV=1	319	25	C	UR	3844.54	3793.38	3366.89	3808.82	3406.44	3876.73
tr|Q7ZXN9|Q7ZXN9_XENLA	tcp1.L	CCT-alpha OS=Xenopus laevis OX=8355 GN=tcp1.L PE=1 SV=1	319	2	C	UR	231.63	248.629	227.751	237.624	219.223	253.332
tr|A0A1L8GQ05|A0A1L8GQ05_XENLA	qars1.L	Glutaminyl-tRNA synthetase OS=Xenopus laevis OX=8355 GN=qars1.L PE=1 SV=1	320	8	C	UR	766.255	891.809	864.955	957.581	982.652	1009.4
tr|A0A1L8GHV1|A0A1L8GHV1_XENLA	XELAEV_18025932mg	Glutaminyl-tRNA synthetase OS=Xenopus laevis OX=8355 GN=XELAEV_18025932mg PE=1 SV=1	320	20	C	UR	3434.72	3663.69	3431.58	3814.42	4046.79	4116.29
tr|Q7ZXZ9|Q7ZXZ9_XENLA	eftud2.S	116 kDa U5 small nuclear ribonucleoprotein component OS=Xenopus laevis OX=8355 GN=eftud2.S PE=2 SV=1	321	1	C	UR	42.1631	25.715	42.2356	36.4076	31.1821	32.219
tr|A0A1L8ESA5|A0A1L8ESA5_XENLA	eftud2.L	116 kDa U5 small nuclear ribonucleoprotein component OS=Xenopus laevis OX=8355 GN=eftud2.L PE=1 SV=1	321	13	C	UR	1938.67	2028.52	1975.71	2172.41	2258.05	2378.21
tr|A0A1L8I2U3|A0A1L8I2U3_XENLA	eef2.2.L	Tr-type G domain-containing protein OS=Xenopus laevis OX=8355 GN=eef2.2.L PE=3 SV=1	321	55	C	UR	7570.99	8610.62	9656.14	10686.9	11277.4	11309.8
tr|Q7ZXP8|Q7ZXP8_XENLA	eef2.1.L	Eef2-prov protein OS=Xenopus laevis OX=8355 GN=eef2.1.L PE=1 SV=1	321	35	C	UR	5775.22	6323.15	6118.78	6654.78	7175.59	7291.64
tr|A0A1L8HMU9|A0A1L8HMU9_XENLA	XELAEV_18009640mg	Tr-type G domain-containing protein OS=Xenopus laevis OX=8355 GN=XELAEV_18009640mg PE=1 SV=1	321	24	C	UR	2181.96	2521.78	2772.94	2966.91	3125.91	3216.15
tr|A8WH57|A8WH57_XENLA	cpvl.L	LOC100127263 protein OS=Xenopus laevis OX=8355 GN=cpvl.L PE=1 SV=1	322	2	C	UR	179.059	156.516	175.921	178.332	187.714	215.258
tr|A0A1L8I062|A0A1L8I062_XENLA	rplp0.L	60S acidic ribosomal protein P0 OS=Xenopus laevis OX=8355 GN=rplp0.L PE=3 SV=1	323	2	C	UR	42.5578	55.5874	123.43	129.608	150.319	135.239
tr|Q8AVI3|Q8AVI3_XENLA	rplp0.S	60S acidic ribosomal protein P0 OS=Xenopus laevis OX=8355 GN=rplp0.S PE=1 SV=1	323	20	C	UR	2309.55	2885.59	3701.75	4550.13	4695.15	5085.6
tr|A0A1L8F028|A0A1L8F028_XENLA	XELAEV_18041207mg	Alpha-1,4 glucan phosphorylase OS=Xenopus laevis OX=8355 GN=XELAEV_18041207mg PE=1 SV=1	324	17	C	UR	2077.2	2568.28	2599.48	3042.22	3005.58	3310.15
tr|A0A1L8F9Y5|A0A1L8F9Y5_XENLA	pygl.L	Alpha-1,4 glucan phosphorylase OS=Xenopus laevis OX=8355 GN=pygl.L PE=1 SV=1	324	53	C	UR	8025.34	9510.02	9663.95	11203.1	11821.3	11808.1
tr|Q801T6|Q801T6_XENLA	pygm.L	Alpha-1,4 glucan phosphorylase OS=Xenopus laevis OX=8355 GN=pygm.L PE=2 SV=1	324	2	C	UR	164.154	134.384	130.046	123.987	165.225	143.432
tr|A0A1L8HN20|A0A1L8HN20_XENLA	elp1.S	Elongator complex protein 1 OS=Xenopus laevis OX=8355 GN=elp1.S PE=1 SV=1	325	15	C	UR	1874.57	2120.19	3182.59	2510.13	2177.89	1956.11
tr|A0A1L8FFA7|A0A1L8FFA7_XENLA	pgd.S	6-phosphogluconate dehydrogenase, decarboxylating OS=Xenopus laevis OX=8355 GN=pgd.S PE=1 SV=1	326	16	C	UR	2000.29	2270.24	2848.5	2602.14	3272.21	3192.16
tr|Q6PB25|Q6PB25_XENLA	pgd.L	6-phosphogluconate dehydrogenase, decarboxylating OS=Xenopus laevis OX=8355 GN=pgd.L PE=1 SV=1	326	5	C	UR	540.78	615.033	729.316	689.7	862.866	872.515
tr|Q641I4|Q641I4_XENLA	ogt.L	O-GlcNAc transferase subunit p110 OS=Xenopus laevis OX=8355 GN=ogt.L PE=1 SV=1	327	3	C	UR	530.206	500.344	446.473	536.376	521.988	595.634
tr|A0A1L8HUR4|A0A1L8HUR4_XENLA	rpl34.L	60S ribosomal protein L34 OS=Xenopus laevis OX=8355 GN=rpl34.L PE=1 SV=1	328	3	C	UR	464.749	529.82	760.12	864.485	800.253	968.941
tr|A0A1L8GJ07|A0A1L8GJ07_XENLA	eif3m.L	Eukaryotic translation initiation factor 3 subunit M OS=Xenopus laevis OX=8355 GN=eif3m.L PE=1 SV=1	329	2	C	UR	124.047	112.098	137.134	131.544	164.596	126.606
tr|Q7ZWN3|Q7ZWN3_XENLA	chd4.L	DNA helicase OS=Xenopus laevis OX=8355 GN=chd4.L PE=1 SV=1	330	14	C	UR	1899.69	3667.47	3287.66	2496.27	1826.91	1971.53
tr|A0A1L8I190|A0A1L8I190_XENLA	kntc1.L	Uncharacterized protein OS=Xenopus laevis OX=8355 GN=kntc1.L PE=1 SV=1	331	45	C	UR	8428.28	7480.66	8779.76	7954.6	4190.78	3767.66
tr|Q6PAW9|Q6PAW9_XENLA	rab10.L	MGC68629 protein OS=Xenopus laevis OX=8355 GN=rab10.L PE=2 SV=1	332	5	C	UR	495.311	690.271	788.88	867.6	852.78	1163.54
tr|Q7ZXF7|Q7ZXF7_XENLA	rab1a.S	Rab1-prov protein OS=Xenopus laevis OX=8355 GN=rab1a.S PE=1 SV=1	332	7	C	UR	768.023	1063.26	1231.53	1184.96	1222.94	1486.9
tr|Q7ZYR1|Q7ZYR1_XENLA	rpl3.L	Rpl3-prov protein OS=Xenopus laevis OX=8355 GN=rpl3.L PE=2 SV=1	333	23	C	UR	3100.37	4474.81	5826.42	6681.02	6871.5	6353.56
tr|A0A1L8GGZ9|A0A1L8GGZ9_XENLA	XELAEV_18025652mg	Uncharacterized protein OS=Xenopus laevis OX=8355 GN=XELAEV_18025652mg PE=3 SV=1	333	3	C	UR	273.196	427.159	503.519	607.172	641.376	627.1
tr|Q505M7|Q505M7_XENLA	LOC734152	Butyryl-CoA dehydrogenase (Fragment) OS=Xenopus laevis OX=8355 GN=LOC734152 PE=2 SV=1	334	2	C	UR	259.738	218.261	267.834	237.565	255.125	253.684
sp|P20342|RS15_XENLA	rps15	40S ribosomal protein S15 OS=Xenopus laevis OX=8355 GN=rps15 PE=2 SV=3	335	11	C	UR	489.9	629.256	1031.12	1226.96	1280.77	1418.67
tr|A0A1L8GTY5|A0A1L8GTY5_XENLA	dnajc2.S	DnaJ homolog subfamily C member 2 OS=Xenopus laevis OX=8355 GN=dnajc2.S PE=1 SV=1	336	7	C	UR	852.763	773.842	915.726	1035.3	1099.12	1086.95
tr|A0A1L8GZB1|A0A1L8GZB1_XENLA	XELAEV_18017776mg	DnaJ homolog subfamily C member 2 OS=Xenopus laevis OX=8355 GN=XELAEV_18017776mg PE=4 SV=1	336	1	C	UR	72.0988	97.5563	117.74	119.403	141.839	160.447
tr|A0A1L8FLJ1|A0A1L8FLJ1_XENLA	arcn1.L	Coatomer subunit delta OS=Xenopus laevis OX=8355 GN=arcn1.L PE=1 SV=1	337	17	C	UR	2852.53	3002.15	2796.57	2489.17	2763.63	2804.87
tr|Q7T0U9|Q7T0U9_XENLA	arcn1.S	Coatomer subunit delta OS=Xenopus laevis OX=8355 GN=arcn1.S PE=2 SV=1	337	1	C	UR	173.6	152.72	146.662	157.007	156.281	167.872
sp|Q6DE95|CUL3A_XENLA	cul3a	Cullin-3-A OS=Xenopus laevis OX=8355 GN=cul3a PE=1 SV=1	338	29	C	UR	8304.16	7073.1	3487.42	3729.33	3508.53	3113.83
tr|A0A1L8H8C2|A0A1L8H8C2_XENLA	ppm1e.S	PPM-type phosphatase domain-containing protein OS=Xenopus laevis OX=8355 GN=ppm1e.S PE=1 SV=1	339	3	C	UR	491.027	426.599	451.199	486.761	495.369	526.954
sp|Q6IP18|RFA2A_XENLA	rpa2-a	Replication protein A 32 kDa subunit-A OS=Xenopus laevis OX=8355 GN=rpa2-a PE=1 SV=1	341	6	C	UR	611.856	557.858	704.769	660.566	711.226	625.076
tr|A0A1L8HA56|A0A1L8HA56_XENLA	pcbp3.S	Uncharacterized protein OS=Xenopus laevis OX=8355 GN=pcbp3.S PE=4 SV=1	342	14	C	UR	1924.23	2227.33	2144.59	1687.26	1368.42	1467.9
tr|A0A1L8FTG3|A0A1L8FTG3_XENLA	XELAEV_18033881mg	Uncharacterized protein OS=Xenopus laevis OX=8355 GN=XELAEV_18033881mg PE=1 SV=1	343	1	C	UR	43.4302	41.019	52.1935	51.4421	36.4114	43.2151
tr|Q5EAT9|Q5EAT9_XENLA	vipas39.L	Spermatogenesis-defective protein 39 homolog OS=Xenopus laevis OX=8355 GN=vipas39.L PE=1 SV=1	344	4	C	UR	729.735	633.864	450.677	478.602	385.857	406.793
tr|Q6DEB8|Q6DEB8_XENLA	acadm.L	Medium-chain specific acyl-CoA dehydrogenase, mitochondrial OS=Xenopus laevis OX=8355 GN=acadm.L PE=2 SV=1	345	3	C	UR	250.382	251.903	315.627	340.969	287.18	325.741
tr|Q3KPK1|Q3KPK1_XENLA	tbcb.S	MGC132396 protein OS=Xenopus laevis OX=8355 GN=tbcb.S PE=1 SV=1	346	4	C	UR	542.39	654.738	890.611	1062.02	1168.69	1297.71
tr|A0A1L8EQX4|A0A1L8EQX4_XENLA	XELAEV_18047771mg	40S ribosomal protein S2 OS=Xenopus laevis OX=8355 GN=XELAEV_18047771mg PE=3 SV=1	347	24	C	UR	2673.93	4050.47	6601.56	7385.3	7472.28	8220.2
tr|Q7T0R9|Q7T0R9_XENLA	rps2.L	40S ribosomal protein S2 OS=Xenopus laevis OX=8355 GN=rps2.L PE=1 SV=1	347	1	C	UR	47.5378	67.2119	113.29	133.939	144.518	175.07
tr|A0A1L8G2Y9|A0A1L8G2Y9_XENLA	prep.S	Post-proline cleaving enzyme OS=Xenopus laevis OX=8355 GN=prep.S PE=1 SV=1	348	16	C	UR	2086.3	2660.84	2851.97	2833.39	3447.6	3693.42
tr|A0A1L8G9B4|A0A1L8G9B4_XENLA	XELAEV_18027234mg	Post-proline cleaving enzyme OS=Xenopus laevis OX=8355 GN=XELAEV_18027234mg PE=1 SV=1	348	2	C	UR	220.503	224.523	232.975	221.382	255.806	264.959
tr|A0A1L8HG19|A0A1L8HG19_XENLA	smg8.L	Protein SMG8 OS=Xenopus laevis OX=8355 GN=smg8.L PE=3 SV=1	349	10	C	UR	1813.89	1520.19	1242.39	1027.66	829.185	764.878
tr|A2RV89|A2RV89_XENLA	LOC733365	Tubulin alpha chain (Fragment) OS=Xenopus laevis OX=8355 GN=LOC733365 PE=2 SV=1	350	14	C	UR	2290.62	3255.42	3583.89	2568.03	3067.31	3236.26
tr|Q6NRV3|Q6NRV3_XENLA	tubal3.1.S	Tubulin alpha chain OS=Xenopus laevis OX=8355 GN=tubal3.1.S PE=1 SV=1	350	34	C	UR	4095.8	4755.25	5768.18	4508.29	4791.33	4922.75
tr|Q5U4V6|Q5U4V6_XENLA	LOC397931	Tubulin alpha chain OS=Xenopus laevis OX=8355 GN=LOC397931 PE=2 SV=1	350	8	C	UR	558.439	609.495	607.379	626.725	656.287	772.555
tr|Q7ZWQ5|Q7ZWQ5_XENLA	tuba1c.S	Tubulin alpha chain OS=Xenopus laevis OX=8355 GN=tuba1c.S PE=2 SV=1	350	12	C	UR	1337.48	1369.03	1209.67	1129.73	1203.33	1320.45
tr|A0A1L8HEI6|A0A1L8HEI6_XENLA	tuba5.L	Tubulin alpha chain OS=Xenopus laevis OX=8355 GN=tuba5.L PE=3 SV=1	350	8	C	UR	674.967	951.582	938.818	761.67	839.907	913.463
tr|Q6DD58|Q6DD58_XENLA	tuba4b.L	Tubulin alpha chain OS=Xenopus laevis OX=8355 GN=tuba4b.L PE=2 SV=1	350	3	C	UR	398.453	433.308	461.552	387.027	409.972	405.666
tr|A0A1L8GZI9|A0A1L8GZI9_XENLA	XELAEV_18017873mg	Tubulin alpha chain OS=Xenopus laevis OX=8355 GN=XELAEV_18017873mg PE=1 SV=1	350	1	C	UR	163.985	279.376	285.969	256.565	254.417	357.817
tr|A5D8M8|A5D8M8_XENLA	nqo1.L	LOC100049751 protein OS=Xenopus laevis OX=8355 GN=nqo1.L PE=2 SV=1	351	7	C	UR	1097.53	1405.22	1670.68	1984.99	1857.54	2318.81
tr|A0A1L8FPI4|A0A1L8FPI4_XENLA	XELAEV_18036482mg	Uncharacterized protein OS=Xenopus laevis OX=8355 GN=XELAEV_18036482mg PE=4 SV=1	352	18	C	UR	2229.82	1937.6	3725.48	2973.38	2904.44	2260.62
tr|Q498I6|Q498I6_XENLA	uroc1.L	Imidazolonepropionate hydrolase OS=Xenopus laevis OX=8355 GN=uroc1.L PE=2 SV=1	353	21	C	UR	4553.33	4378.17	4148.34	4557.01	5013.96	5291.78
tr|Q6GN03|Q6GN03_XENLA	MGC83663	Glycerol-3-phosphate dehydrogenase [NAD(+)] OS=Xenopus laevis OX=8355 GN=MGC83663 PE=1 SV=1	354	9	C	UR	1546.97	1410	2350.31	2271.84	1740.51	1586.82
tr|Q6GR58|Q6GR58_XENLA	mdh2.S	Malate dehydrogenase OS=Xenopus laevis OX=8355 GN=mdh2.S PE=2 SV=1	355	9	C	UR	1004.73	1042.4	1015.18	1278.63	1292.69	1709.02
tr|Q6B4U5|Q6B4U5_XENLA	mdh2.L	Malate dehydrogenase OS=Xenopus laevis OX=8355 GN=mdh2.L PE=1 SV=1	355	7	C	UR	657.707	612.612	716.758	825.143	736.023	894.604
tr|A0A1L8G7Y7|A0A1L8G7Y7_XENLA	XELAEV_18026727mg	Uncharacterized protein OS=Xenopus laevis OX=8355 GN=XELAEV_18026727mg PE=1 SV=1	356	17	C	UR	4484.22	3684.72	2256.16	2372.32	1841.2	1616.36
tr|Q498I7|Q498I7_XENLA	zadh2.S	LOC432094 protein OS=Xenopus laevis OX=8355 GN=zadh2.S PE=2 SV=1	357	3	C	UR	168.552	147.905	427.724	404.547	128.153	132.891
tr|A0A1L8F736|A0A1L8F736_XENLA	gatd3alc.1.L	Uncharacterized protein OS=Xenopus laevis OX=8355 GN=gatd3alc.1.L PE=4 SV=1	358	24	C	UR	2148.42	2106.44	3366.45	3432.37	4758.87	4200.35
tr|A9UM19|A9UM19_XENLA	XB5871767.L	LOC100137677 protein OS=Xenopus laevis OX=8355 GN=XB5871767.L PE=2 SV=1	358	13	C	UR	1547.98	1937.52	2485.63	2982.94	3292.14	3444.54
sp|B1H1S4|SKA3_XENLA	ska3	Spindle and kinetochore-associated protein 3 OS=Xenopus laevis OX=8355 GN=ska3 PE=2 SV=1	359	1	C	UR	248.992	399.331	292.072	265.689	211.928	278.748
sp|Q5XGM3|BHMT1_XENLA	bhmt	Betaine--homocysteine S-methyltransferase 1 OS=Xenopus laevis OX=8355 GN=bhmt PE=2 SV=1	360	4	C	UR	712.94	763.197	736.802	844.443	814.585	917.114
tr|A0A1L8GPP9|A0A1L8GPP9_XENLA	XELAEV_18024004mg	Coatomer subunit gamma OS=Xenopus laevis OX=8355 GN=XELAEV_18024004mg PE=1 SV=1	361	13	C	UR	1869.26	1924.72	1790.8	1927.32	1558.52	1854.48
tr|A0A1L8GHR2|A0A1L8GHR2_XENLA	copg1.S	Coatomer subunit gamma OS=Xenopus laevis OX=8355 GN=copg1.S PE=1 SV=1	361	2	C	UR	70.2758	89.6769	85.4906	96.5754	89.7964	106.611
sp|Q6DKD7|COPG2_XENLA	copg2	Coatomer subunit gamma-2 OS=Xenopus laevis OX=8355 GN=copg2 PE=2 SV=1	361	3	C	UR	413.692	359.211	344.896	352.747	313.841	369.296
sp|Q9DG02|KCC2D_XENLA	camk2d	Calcium/calmodulin-dependent protein kinase type II delta chain OS=Xenopus laevis OX=8355 GN=camk2d PE=2 SV=1	362	7	C	UR	1188.66	1083.9	878.788	877.367	428.015	469.965
tr|A0A1L8FF53|A0A1L8FF53_XENLA	XELAEV_18037152mg	Calcium/calmodulin-dependent protein kinase (Fragment) OS=Xenopus laevis OX=8355 GN=XELAEV_18037152mg PE=1 SV=1	362	11	C	UR	2402.31	2242.64	2046.87	1753.49	1111.89	1089.82
tr|Q9DFZ9|Q9DFZ9_XENLA		Calcium/calmodulin-dependent protein kinase OS=Xenopus laevis OX=8355 PE=2 SV=1	362	1	C	UR	143.133	118.338	110.266	108.089	41.7921	42.4509
tr|Q6DJM1|Q6DJM1_XENLA	adk.S	Adenosine kinase OS=Xenopus laevis OX=8355 GN=adk.S PE=2 SV=1	363	7	C	UR	1085.09	1238.16	1331.59	1377.8	1759.29	2037.72
tr|A0MZ59|A0MZ59_XENLA	carm1p1.L	Coactivator-associated arginine methyltransferase 1 OS=Xenopus laevis OX=8355 GN=carm1p1.L PE=2 SV=1	364	5	C	UR	751.003	699.417	629.679	642.315	641.582	687.938
tr|A0A1L8G5M3|A0A1L8G5M3_XENLA	XELAEV_18030140mg	Uncharacterized protein OS=Xenopus laevis OX=8355 GN=XELAEV_18030140mg PE=1 SV=1	365	5	C	UR	436.771	643.822	1107.02	652.816	149.129	155.899
tr|A0A1L8GBK5|A0A1L8GBK5_XENLA	itsn2.L	Uncharacterized protein OS=Xenopus laevis OX=8355 GN=itsn2.L PE=1 SV=1	365	14	C	UR	1530.75	2305.83	3957.31	2681.43	840.64	957.55
sp|P26233|CTNB1_XENLA	ctnnb1	Catenin beta-1 OS=Xenopus laevis OX=8355 GN=ctnnb1 PE=1 SV=1	366	1	C	UR	37.0359	46.3812	34.8966	43.7303	43.184	43.3358
tr|Q6NTZ3|Q6NTZ3_XENLA	acat2.S	MGC81403 protein OS=Xenopus laevis OX=8355 GN=acat2.S PE=2 SV=1	367	4	C	UR	369.617	421.929	565.199	512.218	602.804	663.498
tr|Q9W794|Q9W794_XENLA	ACAT2	Acetyl-CoA acetyltransferase 2 OS=Xenopus laevis OX=8355 GN=ACAT2 PE=2 SV=1	367	1	C	UR	36.8388	38.553	38.8354	37.1824	41.5014	53.07
tr|Q2VPG6|Q2VPG6_XENLA	ewsr1.L	Uncharacterized protein OS=Xenopus laevis OX=8355 GN=ewsr1.L PE=1 SV=1	368	9	C	UR	2661.42	1983.95	1634.85	1216.34	1171.22	1001.36
tr|Q2VPI2|Q2VPI2_XENLA	ewsr1.S	MGC132026 protein OS=Xenopus laevis OX=8355 GN=ewsr1.S PE=2 SV=1	368	1	C	UR	67.2518	47.4277	40.5614	35.408	29.9477	33.7612
tr|A0A1L8FIZ6|A0A1L8FIZ6_XENLA	wdr11.L	WD_REPEATS_REGION domain-containing protein OS=Xenopus laevis OX=8355 GN=wdr11.L PE=1 SV=1	369	4	C	UR	542.065	560.834	364.618	339.15	220.934	232.749
tr|A0A1L8EWI1|A0A1L8EWI1_XENLA	XELAEV_18044802mg	Formimidoyltetrahydrofolate cyclodeaminase OS=Xenopus laevis OX=8355 GN=XELAEV_18044802mg PE=1 SV=1	370	162	C	UR	8920.58	7468.61	20256.4	19948.6	22344.6	17884.6
tr|Q7SYV7|Q7SYV7_XENLA	ftcd.L	Formimidoyltetrahydrofolate cyclodeaminase OS=Xenopus laevis OX=8355 GN=ftcd.L PE=2 SV=1	370	13	C	UR	1150.74	1011.44	2432.55	2550.61	2831.03	2527.96
sp|P04751|ACTC_XENLA	actc1	Actin, alpha cardiac muscle 1 OS=Xenopus laevis OX=8355 GN=actc1 PE=2 SV=1	371	45	C	UR	9933.26	8085.13	8520.16	8258.24	8265.13	8545.25
sp|P53506|ACT8_XENLA		Actin, cytoplasmic type 8 OS=Xenopus laevis OX=8355 PE=3 SV=1	371	23	C	UR	3494.88	3049.3	3383.8	4429.93	3451.55	4037.23
sp|O93400|ACTB_XENLA	actb	Actin, cytoplasmic 1 OS=Xenopus laevis OX=8355 GN=actb PE=1 SV=1	371	4	C	UR	272.336	227.442	253.997	216.05	237.18	205.624
tr|A0A1L8GM44|A0A1L8GM44_XENLA	eif2b3.L	NTP_transferase domain-containing protein OS=Xenopus laevis OX=8355 GN=eif2b3.L PE=1 SV=1	372	4	C	UR	176.435	171.926	167.871	181.233	187.64	214.974
tr|A0A1L8GQY0|A0A1L8GQY0_XENLA	XELAEV_18019956mg	ENTH domain-containing protein OS=Xenopus laevis OX=8355 GN=XELAEV_18019956mg PE=1 SV=1	373	1	C	UR	98.5194	190.637	194.733	155.32	143.5	175.44
tr|Q8UW67|Q8UW67_XENLA	syngr1.L	Synaptogyrin OS=Xenopus laevis OX=8355 GN=syngr1.L PE=2 SV=1	374	1	C	UR	117.037	107.164	114.986	147.431	147.264	170.133
tr|Q6PCE5|Q6PCE5_XENLA	oxct1.L	Succinyl-CoA:3-ketoacid-coenzyme A transferase OS=Xenopus laevis OX=8355 GN=oxct1.L PE=2 SV=1	375	3	C	UR	141.187	130.122	148.151	151.737	193.947	195.507
tr|B1H1T2|B1H1T2_XENLA	trmt1.L	tRNA (guanine(26)-N(2))-dimethyltransferase OS=Xenopus laevis OX=8355 GN=trmt1.L PE=2 SV=1	376	5	C	UR	571.349	556.07	499.773	565.949	593.33	671.876
tr|A0A1L8GXI4|A0A1L8GXI4_XENLA	hspa4.L	Heat shock 70 kDa protein 4 OS=Xenopus laevis OX=8355 GN=hspa4.L PE=1 SV=1	377	39	C	UR	5867.85	6425.05	6579.13	6746.49	7939.14	8537.5
tr|A0A1L8GV91|A0A1L8GV91_XENLA	XELAEV_18021470mg	Heat shock 70 kDa protein 4 OS=Xenopus laevis OX=8355 GN=XELAEV_18021470mg PE=1 SV=1	377	3	C	UR	350.607	337.565	258.929	284.537	275.903	325.455
tr|A0A1L8FGR3|A0A1L8FGR3_XENLA	XELAEV_18037699mg	Ribosomal_L18e/L15P domain-containing protein OS=Xenopus laevis OX=8355 GN=XELAEV_18037699mg PE=1 SV=1	378	3	C	UR	353.909	427.159	477.021	601.224	555.251	709.372
sp|P02412|RL18B_XENLA	rpl18-b	60S ribosomal protein L18-B OS=Xenopus laevis OX=8355 GN=rpl18-b PE=2 SV=4	378	4	C	UR	352.202	433.826	565.841	711.478	613.686	743.291
tr|Q7ZYL1|Q7ZYL1_XENLA	psmb1.S	Proteasome subunit beta OS=Xenopus laevis OX=8355 GN=psmb1.S PE=1 SV=1	379	6	C	UR	688.269	582.455	559.289	516.731	649.342	621.538
tr|A0A1L8F666|A0A1L8F666_XENLA	gsn.L	Actin-depolymerizing factor OS=Xenopus laevis OX=8355 GN=gsn.L PE=1 SV=1	380	31	C	UR	3956.35	4170.63	5333.7	5244.39	6275.97	5909.68
tr|Q5XHJ8|Q5XHJ8_XENLA	gsn.S	Actin-depolymerizing factor OS=Xenopus laevis OX=8355 GN=gsn.S PE=1 SV=1	380	15	C	UR	2327.44	3239.67	3929.47	3464.01	4633.23	4532.49
tr|A0A1L8GCZ4|A0A1L8GCZ4_XENLA	XELAEV_18024169mg	Pyruvate carboxylase OS=Xenopus laevis OX=8355 GN=XELAEV_18024169mg PE=1 SV=1	381	10	C	UR	1629.25	1727.45	1289.81	1507.39	1593.56	1782.62
tr|Q6AZL9|Q6AZL9_XENLA	rps23.S	40S ribosomal protein S23 OS=Xenopus laevis OX=8355 GN=rps23.S PE=1 SV=1	382	4	C	UR	378.449	475.361	592.066	664.443	830.659	897.304
sp|A2VDC2|HIBCH_XENLA	hibch	3-hydroxyisobutyryl-CoA hydrolase, mitochondrial OS=Xenopus laevis OX=8355 GN=hibch PE=2 SV=1	383	6	C	UR	628.078	600.643	1238.68	1309.5	746.39	746.029
tr|A0A1L8HLG8|A0A1L8HLG8_XENLA	XELAEV_18009133mg	Trafficking protein particle complex subunit 11 OS=Xenopus laevis OX=8355 GN=XELAEV_18009133mg PE=3 SV=1	384	4	C	UR	684.468	657.724	515.463	574.185	391.073	391.733
sp|Q7ZXB1|MCM7B_XENLA	mcm7-b	DNA replication licensing factor mcm7-B OS=Xenopus laevis OX=8355 GN=mcm7-b PE=2 SV=1	385	14	C	UR	2489.3	2312.85	2321.24	2521.81	2627.64	2745.05
tr|B4F6R2|B4F6R2_XENLA	nagk.L	GlcNAc kinase OS=Xenopus laevis OX=8355 GN=nagk.L PE=2 SV=1	387	3	C	UR	435.738	389.415	336.682	253.544	362.453	328.684
tr|A0A1L8EXK5|A0A1L8EXK5_XENLA	nomo3.L	SpaA domain-containing protein OS=Xenopus laevis OX=8355 GN=nomo3.L PE=1 SV=1	388	5	C	UR	266.233	241.152	242.591	296.095	286.506	328.586
tr|A0A1L8GLH9|A0A1L8GLH9_XENLA	exosc6.L	RNase_PH domain-containing protein OS=Xenopus laevis OX=8355 GN=exosc6.L PE=1 SV=1	390	1	C	UR	240.747	193.02	159.759	198.125	180.746	194.196
tr|Q6PH89|Q6PH89_XENLA	h2ac17.L	Histone H2A OS=Xenopus laevis OX=8355 GN=h2ac17.L PE=1 SV=1	391	2	C	UR	230.773	146.719	193.53	223.55	193.472	220.776
tr|Q6DKE3|Q6DKE3_XENLA	h2ac1.S	Histone H2A OS=Xenopus laevis OX=8355 GN=h2ac1.S PE=2 SV=1	391	1	C	UR	31.3171	29.2359	36.3997	38.9748	50.1177	55.2776
sp|Q7ZTK4|IF2A_XENLA	eif2s1	Eukaryotic translation initiation factor 2 subunit 1 OS=Xenopus laevis OX=8355 GN=eif2s1 PE=2 SV=1	392	12	C	UR	2475.41	1857.82	1697.75	2103.16	1271.78	1354.65
tr|A0A1L8FB83|A0A1L8FB83_XENLA	eif2s1.L	Eukaryotic translation initiation factor 2 subunit 1 OS=Xenopus laevis OX=8355 GN=eif2s1.L PE=1 SV=1	392	1	C	UR	94.0107	112.826	95.5516	138.22	91.0482	86.0224
tr|Q6GMA6|Q6GMA6_XENLA	cct6a.S	MGC81949 protein OS=Xenopus laevis OX=8355 GN=cct6a.S PE=1 SV=1	393	19	C	UR	3762.99	5590.4	4274.06	4895.32	3584.05	4673.04
tr|A0A1L8HG76|A0A1L8HG76_XENLA	cct6a.L	Uncharacterized protein OS=Xenopus laevis OX=8355 GN=cct6a.L PE=1 SV=1	393	3	C	UR	262.478	387.137	307.214	346.896	248.124	317.091
tr|A0A1L8I066|A0A1L8I066_XENLA	gcn1.L	Uncharacterized protein OS=Xenopus laevis OX=8355 GN=gcn1.L PE=1 SV=1	394	81	C	UR	9979.81	15814.4	17388.1	15845.2	9456.3	9123.62
tr|A0A1L8HQ62|A0A1L8HQ62_XENLA	XELAEV_18010449mg	Uncharacterized protein OS=Xenopus laevis OX=8355 GN=XELAEV_18010449mg PE=1 SV=1	394	12	C	UR	1426.89	1870.13	2084.14	1885.2	1589.42	1443.3
tr|A0A1L8EXV1|A0A1L8EXV1_XENLA	XELAEV_18045254mg	3-phosphoinositide-dependent protein kinase 1 OS=Xenopus laevis OX=8355 GN=XELAEV_18045254mg PE=1 SV=1	395	7	C	UR	521.542	509.765	700.814	757.147	609.658	620.231
tr|A0A1L8EQJ5|A0A1L8EQJ5_XENLA	pdpk1.S	3-phosphoinositide-dependent protein kinase 1 OS=Xenopus laevis OX=8355 GN=pdpk1.S PE=3 SV=1	395	2	C	UR	187.522	173.763	220.508	242.285	177.198	172.641
sp|Q6GPK9|TAOK2_XENLA	taok2	Serine/threonine-protein kinase TAO2 OS=Xenopus laevis OX=8355 GN=taok2 PE=2 SV=1	396	7	C	UR	1036.53	1083.74	788.638	653.901	581.205	547.386
sp|Q05AW9|SMG9_XENLA	smg9	Protein SMG9 OS=Xenopus laevis OX=8355 GN=smg9 PE=2 SV=1	397	5	C	UR	765.971	616.906	510.941	516.473	389.304	362.047
sp|B7ZR30|STK10_XENLA	stk10-a	Serine/threonine-protein kinase 10-A OS=Xenopus laevis OX=8355 GN=stk10-a PE=1 SV=1	398	2	C	UR	251.722	334.865	277.994	210.613	226.649	190.404
tr|A0A1L8GN33|A0A1L8GN33_XENLA	prrc2c.L	BAT2_N domain-containing protein OS=Xenopus laevis OX=8355 GN=prrc2c.L PE=1 SV=1	399	3	C	UR	288.814	265.672	225.604	242.62	247.912	242.105
tr|A0A1L8GGF3|A0A1L8GGF3_XENLA	XELAEV_18025442mg	BAT2_N domain-containing protein OS=Xenopus laevis OX=8355 GN=XELAEV_18025442mg PE=1 SV=1	399	4	C	UR	650.88	608.662	570.505	573.669	572.769	547.186
tr|A0A1L8HT35|A0A1L8HT35_XENLA	XELAEV_18004985mg	Ribose-5-phosphate isomerase OS=Xenopus laevis OX=8355 GN=XELAEV_18004985mg PE=1 SV=1	400	6	C	UR	772.949	1054.06	1128.9	1400.34	1293.51	1623.28
tr|Q6PAF2|Q6PAF2_XENLA	capn11.L	MGC68756 protein OS=Xenopus laevis OX=8355 GN=capn11.L PE=2 SV=1	401	15	C	UR	2128.92	2584.06	2898.37	3049.98	3260.15	3652.79
tr|Q6DE12|Q6DE12_XENLA	plin3.S	Perilipin OS=Xenopus laevis OX=8355 GN=plin3.S PE=2 SV=1	402	3	C	UR	275.133	272.691	396.223	330.142	208.252	355.844
tr|A0A1L8HW67|A0A1L8HW67_XENLA	XELAEV_18006105mg	Perilipin OS=Xenopus laevis OX=8355 GN=XELAEV_18006105mg PE=1 SV=1	402	3	C	UR	289.031	320.606	392.336	342.085	310.17	405.602
sp|Q7SYR1|OSGEP_XENLA	osgep	Probable tRNA N6-adenosine threonylcarbamoyltransferase OS=Xenopus laevis OX=8355 GN=osgep PE=2 SV=1	403	3	C	UR	201.261	149.359	172.783	151.245	164.962	158.825
tr|Q6AZJ6|Q6AZJ6_XENLA	FSCN1	FSCN1 protein (Fragment) OS=Xenopus laevis OX=8355 GN=FSCN1 PE=2 SV=1	404	19	C	UR	2480.1	2300.54	2696.85	2235.21	2896.02	2736.4
tr|Q4QR37|Q4QR37_XENLA	fscn1.L	Fascin OS=Xenopus laevis OX=8355 GN=fscn1.L PE=1 SV=1	404	11	C	UR	1207.68	1037.36	1108.08	1014.52	1266.48	1220.67
tr|A0A1L8GH02|A0A1L8GH02_XENLA	tnrc6b.S	Uncharacterized protein OS=Xenopus laevis OX=8355 GN=tnrc6b.S PE=3 SV=1	405	2	C	UR	276.299	343.597	192.212	210.27	146.703	154.283
tr|A0A1L8F498|A0A1L8F498_XENLA	XELAEV_18042652mg	Uncharacterized protein OS=Xenopus laevis OX=8355 GN=XELAEV_18042652mg PE=1 SV=1	406	3	C	UR	740.604	837.18	578.183	423.744	211.525	260.067
tr|A1L3N1|A1L3N1_XENLA	phgdh.S	D-3-phosphoglycerate dehydrogenase OS=Xenopus laevis OX=8355 GN=phgdh.S PE=2 SV=1	407	11	C	UR	1278.14	1252.28	1530.35	1566	1440	1594.93
sp|Q561L6|HUTI_XENLA	amdhd1	Probable imidazolonepropionase OS=Xenopus laevis OX=8355 GN=amdhd1 PE=2 SV=1	409	6	C	UR	526.632	579.108	538.163	614.318	575.604	712.771
tr|A0A1L8HTF2|A0A1L8HTF2_XENLA	XELAEV_18005139mg	Uncharacterized protein OS=Xenopus laevis OX=8355 GN=XELAEV_18005139mg PE=1 SV=1	410	1	C	UR	74.6813	61.6135	67.26	63.242	78.8789	86.2119
tr|A0A1L8G7T6|A0A1L8G7T6_XENLA	birc6.L	UBC core domain-containing protein OS=Xenopus laevis OX=8355 GN=birc6.L PE=4 SV=1	411	8	C	UR	736.314	698.665	701.375	634.001	677.492	593.367
tr|Q5M9B0|Q5M9B0_XENLA	rtraf.S	RNA transcription, translation and transport factor protein OS=Xenopus laevis OX=8355 GN=rtraf.S PE=2 SV=1	412	5	C	UR	537.473	767.858	599.313	555.547	543.804	476.834
tr|A0A1L8F1B9|A0A1L8F1B9_XENLA	XELAEV_18041589mg	60S ribosomal protein L7a OS=Xenopus laevis OX=8355 GN=XELAEV_18041589mg PE=1 SV=1	413	12	C	UR	1629.26	1866.06	2680.45	2608.45	2682.45	2771.61
tr|A2VDA5|A2VDA5_XENLA	rpl7a.L	60S ribosomal protein L7a OS=Xenopus laevis OX=8355 GN=rpl7a.L PE=1 SV=1	413	1	C	UR	53.7717	74.4178	96.5931	92.9196	87.0144	94.3106
tr|Q7ZSY1|Q7ZSY1_XENLA	lgals3.L	Galectin OS=Xenopus laevis OX=8355 GN=lgals3.L PE=2 SV=1	414	8	C	UR	946.264	922.251	1030.64	1153.42	1152.75	1383.61
tr|A0A1L8HSG7|A0A1L8HSG7_XENLA	SUCLG1	Succinate--CoA ligase [ADP/GDP-forming] subunit alpha, mitochondrial OS=Xenopus laevis OX=8355 GN=SUCLG1 PE=1 SV=1	415	5	C	UR	654.638	534.733	549.999	515.556	567.512	501.294
tr|A0A1L8HKM0|A0A1L8HKM0_XENLA	suclg1.S	Succinate--CoA ligase [ADP/GDP-forming] subunit alpha, mitochondrial OS=Xenopus laevis OX=8355 GN=suclg1.S PE=1 SV=1	415	1	C	UR	90.2586	70.5849	73.2459	82.5983	82.5493	83.1992
tr|Q6IP81|Q6IP81_XENLA	lta4h.L	Leukotriene A(4) hydrolase OS=Xenopus laevis OX=8355 GN=lta4h.L PE=1 SV=1	416	25	C	UR	2897.59	2922.52	2859.68	3445.33	3286.35	3281.75
tr|Q7ZYG2|Q7ZYG2_XENLA	cstf1.S	Cstf1-prov protein OS=Xenopus laevis OX=8355 GN=cstf1.S PE=1 SV=1	417	11	C	UR	1248.01	1117.99	2223.08	1760.6	904.303	704.234
sp|Q9W7F2|WDR1A_XENLA	wdr1-a	WD repeat-containing protein 1-A OS=Xenopus laevis OX=8355 GN=wdr1-a PE=2 SV=2	418	28	C	UR	4244.67	4740.79	5859.27	4634.72	6300.34	5733.34
sp|Q6PAX7|WDR1B_XENLA	wdr1-b	WD repeat-containing protein 1-B OS=Xenopus laevis OX=8355 GN=wdr1-b PE=2 SV=1	418	7	C	UR	958.449	1152.5	1294.35	1103.1	1512.02	1526.78
tr|A0A1L8H1T0|A0A1L8H1T0_XENLA	XELAEV_18018660mg	R3H domain-containing protein OS=Xenopus laevis OX=8355 GN=XELAEV_18018660mg PE=1 SV=1	419	2	C	UR	233.954	240.464	373.077	340.858	343.182	369.835
tr|A0A1L8FZY1|A0A1L8FZY1_XENLA	XELAEV_18032345mg	Uncharacterized protein OS=Xenopus laevis OX=8355 GN=XELAEV_18032345mg PE=1 SV=1	420	2	C	UR	443.228	379.648	261.39	242.039	230.475	212.092
tr|A0A1L8HWB3|A0A1L8HWB3_XENLA	XELAEV_18006196mg	MHD domain-containing protein OS=Xenopus laevis OX=8355 GN=XELAEV_18006196mg PE=3 SV=1	421	10	C	UR	3125.4	3326.77	2454.32	2724.82	1383.38	1433.85
tr|A0A1L8I0K6|A0A1L8I0K6_XENLA	cltcl1.L	Clathrin heavy chain OS=Xenopus laevis OX=8355 GN=cltcl1.L PE=1 SV=1	422	42	C	UR	8538.91	6727.47	6285.38	6079.56	8069.65	5750.31
tr|A0A1L8HQC0|A0A1L8HQC0_XENLA	cltcl1.S	Clathrin heavy chain OS=Xenopus laevis OX=8355 GN=cltcl1.S PE=3 SV=1	422	4	C	UR	867.727	468.509	465.293	334.671	563.958	338.253
tr|Q6GNR4|Q6GNR4_XENLA	cltc.L	Clathrin heavy chain OS=Xenopus laevis OX=8355 GN=cltc.L PE=2 SV=1	422	39	C	UR	7003.46	5868.58	5483.41	5657.28	7211.82	5430.02
tr|A0A1L8H7Y9|A0A1L8H7Y9_XENLA	cltc.S	Clathrin heavy chain OS=Xenopus laevis OX=8355 GN=cltc.S PE=3 SV=1	422	7	C	UR	584.69	575.878	539.915	551.032	657.344	552.144
sp|Q7ZY87|PURA2_XENLA	adss2	Adenylosuccinate synthetase isozyme 2 OS=Xenopus laevis OX=8355 GN=adss2 PE=2 SV=1	423	19	C	UR	1788.89	1829.86	2063.58	1906.12	2244.49	2266.66
tr|Q6P285|Q6P285_XENLA	uba1.L	Ubiquitin-activating enzyme E1 OS=Xenopus laevis OX=8355 GN=uba1.L PE=2 SV=1	424	46	C	UR	5674.5	6508.91	7021.99	7161.89	8395.16	9064.23
tr|Q801S7|Q801S7_XENLA	uba1a	Ubiquitin-activating enzyme E1 OS=Xenopus laevis OX=8355 GN=uba1a PE=2 SV=1	424	7	C	UR	509.263	630.242	558.01	576.073	635.677	736.238
tr|Q9DEE8|Q9DEE8_XENLA	uba1.S	Ubiquitin-activating enzyme E1 OS=Xenopus laevis OX=8355 GN=uba1.S PE=2 SV=1	424	1	C	UR	64.1086	51.5079	55.6987	56.5078	72.1485	70.8528
sp|Q8JGT5|SAE1_XENLA	sae1	SUMO-activating enzyme subunit 1 OS=Xenopus laevis OX=8355 GN=sae1 PE=2 SV=1	424	11	C	UR	1663.55	1763.57	1886.6	2111.49	2277.59	2507.23
tr|Q0P3R7|Q0P3R7_XENLA	eif2b4.L	LOC496301 protein OS=Xenopus laevis OX=8355 GN=eif2b4.L PE=1 SV=1	425	3	C	UR	331.757	282.797	295.809	327.423	386.528	402.138
tr|Q4V7Z2|Q4V7Z2_XENLA	msn.L	MGC114910 protein OS=Xenopus laevis OX=8355 GN=msn.L PE=2 SV=1	426	12	C	UR	1673.6	1678.48	1554.13	1615.64	1919.88	2015.82
sp|Q6GQL2|PP1B_XENLA	ppp1cb	Serine/threonine-protein phosphatase PP1-beta catalytic subunit OS=Xenopus laevis OX=8355 GN=ppp1cb PE=2 SV=1	427	3	C	UR	504.48	386.826	261.971	289.451	238.327	291.567
tr|Q7ZTR3|Q7ZTR3_XENLA	ppp1ca.L	Serine/threonine-protein phosphatase OS=Xenopus laevis OX=8355 GN=ppp1ca.L PE=2 SV=1	427	6	C	UR	826.9	691.756	517.384	552.784	506.591	544.9
sp|P55862|MCM5A_XENLA	mcm5-a	DNA replication licensing factor mcm5-A OS=Xenopus laevis OX=8355 GN=mcm5-a PE=1 SV=2	428	41	C	UR	8723.18	7072.86	5738.5	5725.49	5444.61	5347.9
tr|A0A1L8H537|A0A1L8H537_XENLA	cct8.S	CCT-theta OS=Xenopus laevis OX=8355 GN=cct8.S PE=1 SV=1	429	25	C	UR	5023.17	4522.73	3803.26	3874.46	3712.7	3831.64
tr|Q7ZTL5|Q7ZTL5_XENLA	cct8.L	CCT-theta OS=Xenopus laevis OX=8355 GN=cct8.L PE=2 SV=1	429	15	C	UR	2991.75	3190.66	2839.72	2877.9	2764.31	3009.55
tr|A0A1L8HDS2|A0A1L8HDS2_XENLA	PAFAH1B1	Lissencephaly-1 homolog OS=Xenopus laevis OX=8355 GN=PAFAH1B1 PE=3 SV=1	430	22	C	UR	3007.69	2612.45	2599.09	2315.55	2973.73	2467.27
tr|A0A1L8G6F2|A0A1L8G6F2_XENLA	XELAEV_18026242mg	Uncharacterized protein OS=Xenopus laevis OX=8355 GN=XELAEV_18026242mg PE=1 SV=1	431	4	C	UR	417.853	438.924	414.132	439.877	466.815	472.274
tr|Q6DEC8|Q6DEC8_XENLA	st13.S	MGC78939 protein OS=Xenopus laevis OX=8355 GN=st13.S PE=1 SV=1	432	11	C	UR	3080.92	2525.61	1076.27	1345.33	1486.72	1324.46
tr|A0A1L8GNG2|A0A1L8GNG2_XENLA	XELAEV_18023555mg	TPR_REGION domain-containing protein OS=Xenopus laevis OX=8355 GN=XELAEV_18023555mg PE=3 SV=1	432	6	C	UR	1688.21	1574.52	605.627	720.315	776.599	740.088
tr|A0A1L8EUQ4|A0A1L8EUQ4_XENLA	tbcd.L	Tubulin-specific chaperone D OS=Xenopus laevis OX=8355 GN=tbcd.L PE=1 SV=1	433	7	C	UR	921.953	1027.25	967.61	1099.03	1113.95	1125.38
tr|Q6DD69|Q6DD69_XENLA	pfkm.S	ATP-dependent 6-phosphofructokinase OS=Xenopus laevis OX=8355 GN=pfkm.S PE=2 SV=1	434	4	C	UR	170.517	181.199	235.685	269.908	197.259	279.012
tr|Q6GPN4|Q6GPN4_XENLA	vps18.S	Vacuolar protein sorting-associated protein 18 homolog OS=Xenopus laevis OX=8355 GN=vps18.S PE=2 SV=1	435	10	C	UR	1338.5	1195.94	971.07	1014.32	822.608	722.476
sp|P41116|RL8_XENLA	rpl8	60S ribosomal protein L8 OS=Xenopus laevis OX=8355 GN=rpl8 PE=2 SV=3	436	12	C	UR	1299.1	1879.56	2906.8	3339.47	3178.77	3553.42
tr|Q6DE20|Q6DE20_XENLA	ptpn9l.S	LOC397709 protein OS=Xenopus laevis OX=8355 GN=ptpn9l.S PE=1 SV=1	437	3	C	UR	965.633	873.53	596.382	594.892	473.414	524.478
sp|Q6PA97|TPPC9_XENLA	trappc9	Trafficking protein particle complex subunit 9 OS=Xenopus laevis OX=8355 GN=trappc9 PE=2 SV=1	438	11	C	UR	1705.71	1417.73	1442.85	1352.51	953.259	954.234
sp|Q68F64|UN45B_XENLA	unc45b	Protein unc-45 homolog B OS=Xenopus laevis OX=8355 GN=unc45b PE=2 SV=1	439	4	C	UR	350.693	311.136	422.797	423.888	400.8	325.677
tr|Q6DCG7|Q6DCG7_XENLA		GB1/RHD3-type G domain-containing protein OS=Xenopus laevis OX=8355 PE=2 SV=1	441	9	C	UR	1185.19	995.301	883.901	1005.94	1043.65	1154.03
tr|A0A1L8FU42|A0A1L8FU42_XENLA	XELAEV_18034089mg	Uncharacterized protein OS=Xenopus laevis OX=8355 GN=XELAEV_18034089mg PE=4 SV=1	442	11	C	UR	1734.74	1532.61	1844.6	1629.98	1585.55	1282.6
tr|A0A1L8FU17|A0A1L8FU17_XENLA	XELAEV_18034090mg	RING-type domain-containing protein OS=Xenopus laevis OX=8355 GN=XELAEV_18034090mg PE=4 SV=1	442	4	C	UR	355.257	283.296	295.338	272.796	268.347	260.932
tr|Q5MMR9|Q5MMR9_XENLA		Brg1 OS=Xenopus laevis OX=8355 PE=2 SV=1	443	6	C	UR	624.492	645.382	607.309	567.706	608.81	623.459
sp|Q09006|STM1A_XENLA	stmn1-a	Stathmin-1-A OS=Xenopus laevis OX=8355 GN=stmn1-a PE=2 SV=1	444	2	C	UR	280.576	301.343	316.072	507.247	508.601	691.663
sp|P50532|SMC4_XENLA	smc4	Structural maintenance of chromosomes protein 4 OS=Xenopus laevis OX=8355 GN=smc4 PE=1 SV=1	445	17	C	UR	2400.69	2427.94	2415.23	2510.42	2786.8	2058.38
sp|O93477|SAHHB_XENLA	ahcy-b	Adenosylhomocysteinase B OS=Xenopus laevis OX=8355 GN=ahcy-b PE=2 SV=1	446	30	C	UR	4443.99	4879.25	4992.56	5924.63	4941.93	5372.88
sp|P51893|SAHHA_XENLA	ahcy-a	Adenosylhomocysteinase A OS=Xenopus laevis OX=8355 GN=ahcy-a PE=2 SV=1	446	2	C	UR	479.497	543.208	499.127	806.993	548.067	723.766
sp|Q569Z2|XPO7B_XENLA	xpo7-b	Exportin-7-B OS=Xenopus laevis OX=8355 GN=xpo7-b PE=2 SV=1	447	6	C	UR	611.375	552.409	470.401	547.572	530.979	536.976
tr|A0A310U7M2|A0A310U7M2_XENLA	XELAEV_18000507mg	Fumarate hydratase, mitochondrial (Fragment) OS=Xenopus laevis OX=8355 GN=XELAEV_18000507mg PE=1 SV=1	448	6	C	UR	955.427	1007.96	1148.67	1132.84	1252.74	1389.92
tr|A0A1L8FNJ7|A0A1L8FNJ7_XENLA	XELAEV_18036124mg	Glycogen [starch] synthase OS=Xenopus laevis OX=8355 GN=XELAEV_18036124mg PE=3 SV=1	449	10	C	UR	1345.25	1611.59	1596.24	1846.87	1828.63	2063.28
tr|Q7SYQ9|Q7SYQ9_XENLA	PP	Inorganic diphosphatase (Fragment) OS=Xenopus laevis OX=8355 GN=PP PE=2 SV=1	450	5	C	UR	656.529	817.708	856.116	1079.95	1053.53	1130
tr|A0A1L8FJX9|A0A1L8FJX9_XENLA	XELAEV_18034852mg	Inorganic diphosphatase OS=Xenopus laevis OX=8355 GN=XELAEV_18034852mg PE=3 SV=1	450	3	C	UR	251.655	273.34	229.593	312.281	349.208	388.073
sp|Q9W6C5|PDC6I_XENLA	pdcd6ip	Programmed cell death 6-interacting protein OS=Xenopus laevis OX=8355 GN=pdcd6ip PE=1 SV=1	451	16	C	UR	1948.16	2303.44	2563.22	2777.03	2856	3242.83
tr|Q52KV1|Q52KV1_XENLA	ctsd.S	Cathepsin D OS=Xenopus laevis OX=8355 GN=ctsd.S PE=2 SV=1	452	3	C	UR	388.795	338.097	253.995	249.625	268.595	310.123
tr|A0A1L8GDA0|A0A1L8GDA0_XENLA	XELAEV_18024367mg	Cathepsin D OS=Xenopus laevis OX=8355 GN=XELAEV_18024367mg PE=1 SV=1	452	2	C	UR	211.558	212.733	211.677	219.363	248.924	266.898
tr|Q7ZYR7|Q7ZYR7_XENLA	ppm1g.S	Ppm1g-prov protein OS=Xenopus laevis OX=8355 GN=ppm1g.S PE=1 SV=1	453	4	C	UR	618.127	561.948	738.503	569.66	823.163	714.278
tr|A0A1L8GYM0|A0A1L8GYM0_XENLA	cct2.L	CCT-beta OS=Xenopus laevis OX=8355 GN=cct2.L PE=1 SV=1	454	21	C	UR	3083.96	3332.7	3027.65	3238.89	3053.44	3642.56
tr|Q8AVB7|Q8AVB7_XENLA	cct2.S	CCT-beta OS=Xenopus laevis OX=8355 GN=cct2.S PE=1 SV=1	454	10	C	UR	1024.73	1010.45	1003.1	1033.29	920.375	1121.17
tr|Q6PAB5|Q6PAB5_XENLA	akr1b1.S	MGC68609 protein OS=Xenopus laevis OX=8355 GN=akr1b1.S PE=2 SV=1	455	11	C	UR	1836.29	2179.75	1993.47	2411.95	2197.44	2331.4
tr|Q6DFB5|Q6DFB5_XENLA	agps.L	Alkylglycerone-phosphate synthase OS=Xenopus laevis OX=8355 GN=agps.L PE=2 SV=1	456	8	C	UR	561.578	589.018	2004.58	2086.11	642.219	636.196
tr|A0A1L8EPH7|A0A1L8EPH7_XENLA	XELAEV_18047192mg	Alkylglycerone-phosphate synthase OS=Xenopus laevis OX=8355 GN=XELAEV_18047192mg PE=1 SV=1	456	11	C	UR	873.754	850.049	3715.57	3885.21	852.493	942.358
tr|B1WBA5|B1WBA5_XENLA	dnmt1.S	DNA (cytosine-5)-methyltransferase OS=Xenopus laevis OX=8355 GN=dnmt1.S PE=2 SV=1	457	16	C	UR	2408.92	2421.6	2387.03	2124.87	2479.33	2483.8
tr|A0A1L8H2S5|A0A1L8H2S5_XENLA	XELAEV_18018997mg	DNA (cytosine-5)-methyltransferase OS=Xenopus laevis OX=8355 GN=XELAEV_18018997mg PE=3 SV=1	457	9	C	UR	1561.3	1547.29	1618.92	1386.37	1723.77	1714
tr|A0A1L8GLT4|A0A1L8GLT4_XENLA	XELAEV_18022892mg	Phosvitin OS=Xenopus laevis OX=8355 GN=XELAEV_18022892mg PE=4 SV=1	458	4	C	UR	516.832	494.089	459.769	578.637	586.68	655.273
sp|P18709|VITA2_XENLA		Vitellogenin-A2 OS=Xenopus laevis OX=8355 PE=1 SV=1	458	10	C	UR	1135.49	1107.02	1102.73	1212.84	1379.21	1549.09
tr|A0A1L8GLM1|A0A1L8GLM1_XENLA	XELAEV_18022891mg	Phosvitin OS=Xenopus laevis OX=8355 GN=XELAEV_18022891mg PE=4 SV=1	458	1	C	UR	71.8364	89.7869	101.85	116.41	121.13	165.079
tr|A0A1L8HRK6|A0A1L8HRK6_XENLA	mtrex.S	Uncharacterized protein OS=Xenopus laevis OX=8355 GN=mtrex.S PE=1 SV=1	459	8	C	UR	1751.19	1853.51	1826.47	1771.89	1955.99	1599.61
sp|O57683|SF3B1_XENLA	sf3b1	Splicing factor 3B subunit 1 OS=Xenopus laevis OX=8355 GN=sf3b1 PE=2 SV=1	460	8	C	UR	1161.52	1097.91	1031.72	1002.75	1184.44	1061.74
sp|Q6DD04|ILF3B_XENLA	ilf3-b	Interleukin enhancer-binding factor 3-B OS=Xenopus laevis OX=8355 GN=ilf3-b PE=1 SV=2	461	10	C	UR	762.76	902.592	929.108	963.253	1104.38	1231.2
tr|Q5FWK9|Q5FWK9_XENLA	strbp.S	Spermatid perinuclear RNA-binding protein OS=Xenopus laevis OX=8355 GN=strbp.S PE=2 SV=1	461	3	C	UR	437.153	410.805	586.973	370.254	521.012	529.109
sp|P28024|PSB4_XENLA	psmb4	Proteasome subunit beta type-4 (Fragment) OS=Xenopus laevis OX=8355 GN=psmb4 PE=2 SV=2	462	2	C	UR	174.784	147.092	177.605	176.196	211.379	211.724
tr|Q66J40|Q66J40_XENLA	anxa7.S	Annexin OS=Xenopus laevis OX=8355 GN=anxa7.S PE=1 SV=1	463	7	C	UR	929.028	1029.03	1191.91	1508.17	1596.4	1877.48
tr|Q6DCF9|Q6DCF9_XENLA	anxa7.L	Annexin OS=Xenopus laevis OX=8355 GN=anxa7.L PE=2 SV=1	463	6	C	UR	663.07	669.313	762.726	915.784	992.335	1115.69
tr|A0A1L8G3I1|A0A1L8G3I1_XENLA	eif4g1.S	Uncharacterized protein OS=Xenopus laevis OX=8355 GN=eif4g1.S PE=1 SV=1	464	42	C	UR	6313.72	7123.79	7022.02	5590.8	5433.91	5725.17
tr|A0A1L8G9T6|A0A1L8G9T6_XENLA	eif4g1.L	Uncharacterized protein OS=Xenopus laevis OX=8355 GN=eif4g1.L PE=1 SV=1	464	15	C	UR	2732.39	2783.08	2707.14	2191.23	2098.86	2243.98
tr|A0A1L8FP62|A0A1L8FP62_XENLA	XELAEV_18036352mg	Uncharacterized protein OS=Xenopus laevis OX=8355 GN=XELAEV_18036352mg PE=3 SV=1	464	6	C	UR	859.53	1007.84	910.059	839.841	754.21	877.026
tr|A0A1L8F3Z4|A0A1L8F3Z4_XENLA	hnrnpul1.S	B30.2/SPRY domain-containing protein OS=Xenopus laevis OX=8355 GN=hnrnpul1.S PE=4 SV=1	465	2	C	UR	287.491	288.147	233.524	223.998	247.508	265.379
sp|P02362|RS7_XENLA	rps7	40S ribosomal protein S7 OS=Xenopus laevis OX=8355 GN=rps7 PE=2 SV=2	466	11	C	UR	676.59	864.587	1522.64	1891.09	1765.39	2107.26
tr|A0A1L8GGD4|A0A1L8GGD4_XENLA	kyat3.S	Cysteine-S-conjugate beta-lyase 2 OS=Xenopus laevis OX=8355 GN=kyat3.S PE=1 SV=1	467	3	C	UR	276.856	323.915	287.706	317.102	353.09	374.254
sp|P49739|MCM3M_XENLA	mmcm3	Maternal DNA replication licensing factor mcm3 OS=Xenopus laevis OX=8355 GN=mmcm3 PE=1 SV=2	468	19	C	UR	3315.88	3359.46	3002.8	3392.78	3154.12	3710.89
sp|Q7ZXZ0|MCM3Z_XENLA	zmcm3	Zygotic DNA replication licensing factor mcm3 OS=Xenopus laevis OX=8355 GN=zmcm3 PE=1 SV=1	468	1	C	UR	165.358	120.1	103.967	125.567	126.589	137.031
tr|A0A1L8GQZ2|A0A1L8GQZ2_XENLA	ttc1.S	TPR_REGION domain-containing protein OS=Xenopus laevis OX=8355 GN=ttc1.S PE=1 SV=1	469	5	C	UR	846.311	698.347	1361.3	1265.8	2163.04	1518.55
sp|O93309|SMC3_XENLA	smc3	Structural maintenance of chromosomes protein 3 OS=Xenopus laevis OX=8355 GN=smc3 PE=1 SV=2	471	24	C	UR	4634.79	4484.54	7100.86	6257.32	3621.87	2936.4
tr|A0A1L8FDP8|A0A1L8FDP8_XENLA	smc3.S	Structural maintenance of chromosomes protein OS=Xenopus laevis OX=8355 GN=smc3.S PE=1 SV=1	471	2	C	UR	247.044	184.048	237.712	211.169	161.771	156.451
tr|A2VD69|A2VD69_XENLA	LOC100037176	LOC100037176 protein OS=Xenopus laevis OX=8355 GN=LOC100037176 PE=2 SV=1	472	5	C	UR	343.106	368.986	353.381	438.937	383.226	425.347
tr|Q8AVU1|Q8AVU1_XENLA	tubb6.S	Tubulin beta chain OS=Xenopus laevis OX=8355 GN=tubb6.S PE=2 SV=1	473	2	C	UR	175.325	134.754	149.162	140.65	164.885	154.319
sp|P30883|TBB4_XENLA	tubb4	Tubulin beta-4 chain OS=Xenopus laevis OX=8355 GN=tubb4 PE=2 SV=1	473	54	C	UR	4423.91	6293.05	6805.21	6383.92	6000.21	7357.77
tr|A0A1L8ELN5|A0A1L8ELN5_XENLA	XELAEV_18046263mg	Tubulin beta chain OS=Xenopus laevis OX=8355 GN=XELAEV_18046263mg PE=3 SV=1	473	2	C	UR	119.197	129.851	116.178	130.152	135.645	168.798
tr|Q7ZWP4|Q7ZWP4_XENLA	tubb4a.S	Tubulin beta chain OS=Xenopus laevis OX=8355 GN=tubb4a.S PE=2 SV=1	473	8	C	UR	620.807	746.694	819.5	738.232	813.058	906.756
tr|Q6AZL6|Q6AZL6_XENLA	eif4a1.S	RNA helicase OS=Xenopus laevis OX=8355 GN=eif4a1.S PE=2 SV=1	474	25	C	UR	5483.21	5081.57	4412.01	5578.37	4839.21	5074.64
tr|O42576|O42576_XENLA		RNA helicase OS=Xenopus laevis OX=8355 PE=2 SV=1	474	2	C	UR	201.391	188.797	163.463	232.292	222.209	217.951
tr|Q6NU02|Q6NU02_XENLA	eif4a1.L	RNA helicase OS=Xenopus laevis OX=8355 GN=eif4a1.L PE=1 SV=1	474	1	C	UR	79.4174	64.2596	65.6397	70.4119	77.6645	72.1206
tr|A0A1L8GIT4|A0A1L8GIT4_XENLA	nadsyn1.L	Glutamine-dependent NAD(+) synthetase OS=Xenopus laevis OX=8355 GN=nadsyn1.L PE=1 SV=1	475	2	C	UR	159.598	128.252	127.823	133.645	265.345	233.671
tr|A0A1L8ERX0|A0A1L8ERX0_XENLA	psmd3.L	PCI domain-containing protein OS=Xenopus laevis OX=8355 GN=psmd3.L PE=1 SV=1	476	14	C	UR	2717.71	2289.69	2165.71	2547.05	2751.74	2477.36
tr|A0A1L8HS89|A0A1L8HS89_XENLA	ubap2.S	UBA domain-containing protein OS=Xenopus laevis OX=8355 GN=ubap2.S PE=1 SV=1	477	4	C	UR	583.512	552.891	358.088	306.724	292.381	308.959
tr|A0A310U9R0|A0A310U9R0_XENLA	XELAEV_18000138mg	UBA domain-containing protein OS=Xenopus laevis OX=8355 GN=XELAEV_18000138mg PE=1 SV=1	477	2	C	UR	123.187	85.5432	70.7913	72.9435	74.8356	85.8346
tr|A0A1L8FAY1|A0A1L8FAY1_XENLA	XELAEV_18040032mg	CNH domain-containing protein OS=Xenopus laevis OX=8355 GN=XELAEV_18040032mg PE=1 SV=1	478	8	C	UR	1580.05	1423.85	1273.01	1146.9	1085.97	995.471
tr|Q5XGL4|Q5XGL4_XENLA	psma6.S	Proteasome subunit alpha type OS=Xenopus laevis OX=8355 GN=psma6.S PE=2 SV=1	479	18	C	UR	4276.2	3858.86	4285.75	3793.86	5195.95	4531.3
tr|Q6AZR7|Q6AZR7_XENLA	psma6.L	Proteasome subunit alpha type OS=Xenopus laevis OX=8355 GN=psma6.L PE=1 SV=1	479	2	C	UR	131.893	120.62	112.324	123.115	163.312	150.161
tr|A0A1L8H338|A0A1L8H338_XENLA	XELAEV_18019123mg	Uncharacterized protein OS=Xenopus laevis OX=8355 GN=XELAEV_18019123mg PE=1 SV=1	480	11	C	UR	2248.15	1828.79	1869.25	1925.56	2123.66	2197.89
tr|Q8AX85|Q8AX85_XENLA	khsrp.S	RNA-binding protein VgRBP71 OS=Xenopus laevis OX=8355 GN=khsrp.S PE=2 SV=1	480	5	C	UR	382.386	358.474	360.934	387.066	395.399	437.561
tr|Q6IRB9|Q6IRB9_XENLA	fubp1.L	MGC78835 protein OS=Xenopus laevis OX=8355 GN=fubp1.L PE=1 SV=1	480	5	C	UR	633.915	554.878	544.702	584.627	578.336	616.611
tr|Q7ZXS1|Q7ZXS1_XENLA	fubp1.S	Fubp1 protein OS=Xenopus laevis OX=8355 GN=fubp1.S PE=2 SV=1	480	10	C	UR	2643.74	2041.24	1893.83	1885.98	1960.46	2084.42
tr|A0A1L8F539|A0A1L8F539_XENLA	XELAEV_18042931mg	UBA domain-containing protein OS=Xenopus laevis OX=8355 GN=XELAEV_18042931mg PE=1 SV=1	481	4	C	UR	587.297	581.678	359.756	280.348	250.595	290.737
tr|Q6PA42|Q6PA42_XENLA	hpgds.L	MGC68589 protein OS=Xenopus laevis OX=8355 GN=hpgds.L PE=2 SV=1	482	5	C	UR	507.524	543.31	504.616	486.999	678.456	502.857
tr|Q7SZA7|Q7SZA7_XENLA	hpgds.S	XlGSTS1-1 protein OS=Xenopus laevis OX=8355 GN=hpgds.S PE=2 SV=1	482	26	C	UR	4947.43	5198.88	5398.73	5326.85	8179.64	5568.09
tr|Q9I8J7|Q9I8J7_XENLA	tktl2.L	MGC69114 protein OS=Xenopus laevis OX=8355 GN=tktl2.L PE=1 SV=1	483	38	C	UR	4864.94	4866.05	5488.93	5956.89	6405.96	6576.57
tr|Q6PAD4|Q6PAD4_XENLA	tkt.L	MGC68785 protein OS=Xenopus laevis OX=8355 GN=tkt.L PE=2 SV=1	483	20	C	UR	2789.51	3258.31	3585.83	3750.71	4180.43	4676.48
sp|Q6AZN6|PK3C3_XENLA	pik3c3	Phosphatidylinositol 3-kinase catalytic subunit type 3 OS=Xenopus laevis OX=8355 GN=pik3c3 PE=2 SV=1	484	4	C	UR	661.661	745.981	761.771	711.686	377.505	392.416
sp|Q98SP8|EPABA_XENLA	epabp-a	Embryonic polyadenylate-binding protein A OS=Xenopus laevis OX=8355 GN=epabp-a PE=1 SV=2	485	14	C	UR	2106.96	2351.26	2539.53	2502.5	2230.16	2466.36
sp|Q6GR16|EPABB_XENLA	epabp-b	Embryonic polyadenylate-binding protein B OS=Xenopus laevis OX=8355 GN=epabp-b PE=2 SV=1	485	1	C	UR	93.6532	133.641	134.805	148.769	156.833	175.096
sp|P20965|PABPA_XENLA	pabpc1-a	Polyadenylate-binding protein 1-A OS=Xenopus laevis OX=8355 GN=pabpc1-a PE=1 SV=3	485	2	C	UR	255.268	184.118	238.159	129.545	185.023	148.932
tr|Q7ZY57|Q7ZY57_XENLA	eif2s3.S	Protein-synthesizing GTPase OS=Xenopus laevis OX=8355 GN=eif2s3.S PE=2 SV=1	486	19	C	UR	4493.41	3620.07	3561.83	3548.82	2033.63	2183.91
tr|A0A1L8FQQ7|A0A1L8FQQ7_XENLA	cul2.S	CULLIN_2 domain-containing protein OS=Xenopus laevis OX=8355 GN=cul2.S PE=1 SV=1	487	5	C	UR	549.425	476.626	367.536	374.191	427.264	375.754
tr|Q6PCF2|Q6PCF2_XENLA	cul2.L	MGC69167 protein OS=Xenopus laevis OX=8355 GN=cul2.L PE=2 SV=1	487	2	C	UR	459.689	388.886	263.277	331.775	346.827	327.419
tr|A0A1L8EXS4|A0A1L8EXS4_XENLA	ints1.L	DUF3677 domain-containing protein OS=Xenopus laevis OX=8355 GN=ints1.L PE=1 SV=1	488	8	C	UR	522.924	1321.62	1390.92	1067.43	438.237	497.132
tr|Q4A1D1|Q4A1D1_XENLA	XB5939409.L	Cleavage stimulation factor, 3' pre-RNA, subunit 3, 77kDa OS=Xenopus laevis OX=8355 GN=XB5939409.L PE=2 SV=1	489	11	C	UR	1713.26	1544.38	2648.69	2779.05	1154.39	860.317
tr|Q6DDM9|Q6DDM9_XENLA	cstf3.S	Cstf3-prov protein OS=Xenopus laevis OX=8355 GN=cstf3.S PE=2 SV=1	489	5	C	UR	364.666	399.535	409.038	467.479	223.074	234.256
tr|A0A1L8GL32|A0A1L8GL32_XENLA	gpi.L	Glucose-6-phosphate isomerase OS=Xenopus laevis OX=8355 GN=gpi.L PE=1 SV=1	490	46	C	UR	5943.55	5950.89	5639.01	6349.51	6830.77	7488.69
tr|Q6GP33|Q6GP33_XENLA	gpi.S	Glucose-6-phosphate isomerase OS=Xenopus laevis OX=8355 GN=gpi.S PE=2 SV=1	490	15	C	UR	1548.36	1684.91	1659.01	1801.22	1795.23	2075.84
tr|A0A1L8HGE0|A0A1L8HGE0_XENLA	rpl24.L	TRASH domain-containing protein OS=Xenopus laevis OX=8355 GN=rpl24.L PE=3 SV=1	491	18	C	UR	2610.13	2782.88	3711.43	3273.62	4193.64	3917.54
sp|Q9PVY6|PSA7A_XENLA	psma7-a	Proteasome subunit alpha type-7-A OS=Xenopus laevis OX=8355 GN=psma7-a PE=2 SV=1	492	7	C	UR	1364.7	1072.73	1248.92	1272.42	1504.62	1392.08
tr|A0A1L8F3J7|A0A1L8F3J7_XENLA	hsd17b8.S	Uncharacterized protein OS=Xenopus laevis OX=8355 GN=hsd17b8.S PE=1 SV=1	493	5	C	UR	453.899	415.618	624.508	539.357	334.498	356.018
tr|A0A1L8FEF1|A0A1L8FEF1_XENLA	ide.S	Uncharacterized protein OS=Xenopus laevis OX=8355 GN=ide.S PE=1 SV=1	494	11	C	UR	1815.26	1576.95	1594.61	2015.7	1459.5	1472.52
tr|A0A1L8FJ71|A0A1L8FJ71_XENLA	XELAEV_18034599mg	Uncharacterized protein OS=Xenopus laevis OX=8355 GN=XELAEV_18034599mg PE=3 SV=1	494	1	C	UR	124.693	99.9289	84.0663	80.7619	100.596	92.2322
sp|Q68FJ0|NUP85_XENLA	nup85	Nuclear pore complex protein Nup85 OS=Xenopus laevis OX=8355 GN=nup85 PE=2 SV=1	495	4	C	UR	1361.53	1133.62	655.417	737.678	654	584.464
tr|A0A1L8G4H4|A0A1L8G4H4_XENLA	eif2a.S	Eukaryotic translation initiation factor 2A OS=Xenopus laevis OX=8355 GN=eif2a.S PE=1 SV=1	496	18	C	UR	2087.59	2258.26	2729.15	2637.58	2938.47	2879.14
tr|A0A1L8GAF3|A0A1L8GAF3_XENLA	eif2a.L	Eukaryotic translation initiation factor 2A OS=Xenopus laevis OX=8355 GN=eif2a.L PE=3 SV=1	496	7	C	UR	1086.69	1168.62	1470.26	1380.24	1576.53	1399.06
tr|A0A1L8GW47|A0A1L8GW47_XENLA	ttll12.L	Uncharacterized protein OS=Xenopus laevis OX=8355 GN=ttll12.L PE=1 SV=1	497	3	C	UR	421.492	417.618	360.758	427.052	412.417	457.396
tr|Q6NRQ9|Q6NRQ9_XENLA	MGC82327	Glutathione-dependent dehydroascorbate reductase OS=Xenopus laevis OX=8355 GN=MGC82327 PE=2 SV=1	498	14	C	UR	2227.65	2770.7	2965.5	3558.41	3359.26	3709.93
tr|Q6GQG6|Q6GQG6_XENLA	npm2.L	Npm-A protein OS=Xenopus laevis OX=8355 GN=npm2.L PE=1 SV=1	499	11	C	UR	1298.75	1575.49	1470.54	1686.49	1971.12	2291.63
tr|A0A1L8GRP4|A0A1L8GRP4_XENLA	npm2.S	Nucleoplasmin domain-containing protein OS=Xenopus laevis OX=8355 GN=npm2.S PE=3 SV=1	499	7	C	UR	831.447	955.623	934.805	1138.42	1251.12	1517.82
sp|Q91883|BIP_XENLA	hspa5	Endoplasmic reticulum chaperone BiP OS=Xenopus laevis OX=8355 GN=hspa5 PE=2 SV=1	500	37	C	UR	8489.52	5852.19	4654.74	4845.34	5824.68	5861.14
tr|Q8AVE3|Q8AVE3_XENLA	hspa5.S	78 kDa glucose-regulated protein OS=Xenopus laevis OX=8355 GN=hspa5.S PE=1 SV=1	500	3	C	UR	347.568	349.452	253.224	232.638	253.206	254.046
tr|Q6AZH8|Q6AZH8_XENLA	hspa1a.S	Uncharacterized protein OS=Xenopus laevis OX=8355 GN=hspa1a.S PE=2 SV=1	500	44	C	UR	11490.9	6063.93	3266.24	3386.47	3808.21	3722.5
tr|Q8AVE2|Q8AVE2_XENLA	hspa1l.S	Hsc70 protein OS=Xenopus laevis OX=8355 GN=hspa1l.S PE=2 SV=1	500	72	C	UR	23604.9	14543.2	6153.54	6160.35	7376.53	6855.07
tr|Q7ZTK6|Q7ZTK6_XENLA	hspa8.L	MGC53952 protein OS=Xenopus laevis OX=8355 GN=hspa8.L PE=2 SV=1	500	16	C	UR	3011.31	2426.45	1421.69	1425.39	1643.34	1605.26
sp|P02827|HSP70_XENLA		Heat shock 70 kDa protein OS=Xenopus laevis OX=8355 PE=2 SV=1	500	13	C	UR	6859.54	6278.4	2423.07	2292.99	2779.55	2607
tr|A0A1L8FA78|A0A1L8FA78_XENLA	XELAEV_18039768mg	Uncharacterized protein OS=Xenopus laevis OX=8355 GN=XELAEV_18039768mg PE=1 SV=1	500	2	C	UR	383.208	203.564	90.758	79.4441	120.688	95.0267
tr|Q7ZX34|Q7ZX34_XENLA	hspa9.S	75 kDa glucose-regulated protein OS=Xenopus laevis OX=8355 GN=hspa9.S PE=1 SV=1	500	7	C	UR	1048.48	874.78	877.317	872.018	1037.11	1084.32
tr|Q0VGW5|Q0VGW5_XENLA	mpst.S	Sulfurtransferase OS=Xenopus laevis OX=8355 GN=mpst.S PE=2 SV=1	501	6	C	UR	763.67	739.404	754.612	938.914	902.394	1114.01
tr|A0A1L8G9L1|A0A1L8G9L1_XENLA	ascc3.L	Activating signal cointegrator 1 complex subunit 3 OS=Xenopus laevis OX=8355 GN=ascc3.L PE=1 SV=1	502	10	C	UR	989.5	1331.15	1250.35	1237.22	796.63	791.16
tr|A0A310TRG4|A0A310TRG4_XENLA	rps19.S	40S ribosomal protein S19 OS=Xenopus laevis OX=8355 GN=rps19.S PE=1 SV=1	503	10	C	UR	1154.45	1500.99	2751.33	3337.16	3464.61	4245.71
tr|A0A1L8FNR9|A0A1L8FNR9_XENLA	rps19.L	40S ribosomal protein S19 OS=Xenopus laevis OX=8355 GN=rps19.L PE=3 SV=1	503	1	C	UR	80.959	86.7099	92.036	112.992	102.526	118.858
tr|A0A1L8EYF7|A0A1L8EYF7_XENLA	arhgap17.L	Uncharacterized protein OS=Xenopus laevis OX=8355 GN=arhgap17.L PE=1 SV=1	504	2	C	UR	359.676	665.639	397.324	329.984	361.691	481.581
tr|Q7ZWK5|Q7ZWK5_XENLA	cpt1al.L	Carnitine O-palmitoyltransferase OS=Xenopus laevis OX=8355 GN=cpt1al.L PE=2 SV=1	505	1	C	UR	92.572	86.1435	73.9103	94.1568	79.0685	91.5438
tr|A0A1L8G8H3|A0A1L8G8H3_XENLA	XELAEV_18026910mg	SpoU_methylase domain-containing protein OS=Xenopus laevis OX=8355 GN=XELAEV_18026910mg PE=1 SV=1	506	4	C	UR	857.393	691.283	465.196	444.844	529.01	510.156
tr|A0A1L8HN51|A0A1L8HN51_XENLA	XELAEV_18009751mg	Peptidase_M3 domain-containing protein OS=Xenopus laevis OX=8355 GN=XELAEV_18009751mg PE=1 SV=1	508	20	C	UR	2127.4	2446.89	2462.75	2764.45	2532.35	2879.26
tr|A1L3I1|A1L3I1_XENLA	LOC398774	LOC398774 protein OS=Xenopus laevis OX=8355 GN=LOC398774 PE=2 SV=1	509	2	C	UR	274.393	280.143	225.332	229.202	281.44	356.16
tr|A0A1L8H8V8|A0A1L8H8V8_XENLA	XELAEV_18015540mg	Tr-type G domain-containing protein OS=Xenopus laevis OX=8355 GN=XELAEV_18015540mg PE=1 SV=1	510	6	C	UR	552.866	580.131	633.652	633.783	589.08	642.63
tr|A0A1L8HGE6|A0A1L8HGE6_XENLA	XELAEV_18012847mg	Tudor domain-containing protein OS=Xenopus laevis OX=8355 GN=XELAEV_18012847mg PE=4 SV=1	511	1	C	UR	195.575	221.508	222.327	185.427	154.985	151.555
sp|B6CHA3|UHRF1_XENLA	uhrf1	E3 ubiquitin-protein ligase UHRF1 OS=Xenopus laevis OX=8355 GN=uhrf1 PE=2 SV=1	512	7	C	UR	787.972	766.515	742.233	615.273	704.991	721.932
tr|Q4V871|Q4V871_XENLA	MGC114621	MGC114621 protein OS=Xenopus laevis OX=8355 GN=MGC114621 PE=2 SV=1	513	1	C	UR	23.9092	25.8147	47.8885	85.7361	92.5357	163.543
tr|Q7SZT6|Q7SZT6_XENLA	rps13.L	40S ribosomal protein S13 OS=Xenopus laevis OX=8355 GN=rps13.L PE=2 SV=1	514	7	C	UR	927.281	1317.56	2247.27	2771.2	2845.6	3190.94
sp|Q68FI4|APC5A_XENLA	arpc5-a	Actin-related protein 2/3 complex subunit 5-A OS=Xenopus laevis OX=8355 GN=arpc5-a PE=2 SV=1	515	1	C	UR	72.9874	72.6053	53.2658	69.4289	70.2342	90.5803
tr|A0A1L8H1S6|A0A1L8H1S6_XENLA	XELAEV_18018631mg	Peptidyl-prolyl cis-trans isomerase OS=Xenopus laevis OX=8355 GN=XELAEV_18018631mg PE=3 SV=1	516	20	C	UR	6619.1	5030.7	5199.1	6400.5	6987.44	7350.17
tr|Q8AVP8|Q8AVP8_XENLA	ppia.S	Peptidyl-prolyl cis-trans isomerase OS=Xenopus laevis OX=8355 GN=ppia.S PE=1 SV=1	516	61	C	UR	6867.47	5681.79	5488.14	6232.16	6621.72	7194.6
tr|A0A1L8I327|A0A1L8I327_XENLA	XELAEV_18008522mg	Kinesin motor domain-containing protein OS=Xenopus laevis OX=8355 GN=XELAEV_18008522mg PE=3 SV=1	517	2	C	UR	107.616	134.547	157.258	138.78	89.7262	91.5684
tr|A0A1L8GIX3|A0A1L8GIX3_XENLA	XELAEV_18021930mg	Uncharacterized protein OS=Xenopus laevis OX=8355 GN=XELAEV_18021930mg PE=1 SV=1	518	9	C	UR	1447.25	1369.64	1037.29	976.918	817.885	844.019
sp|P50143|TCPG_XENLA	cct3	T-complex protein 1 subunit gamma OS=Xenopus laevis OX=8355 GN=cct3 PE=2 SV=2	519	48	C	UR	7363.29	7923.69	6439.48	7117.11	6163.07	6475.83
sp|Q6NRH1|DCAF8_XENLA	dcaf8	DDB1- and CUL4-associated factor 8 OS=Xenopus laevis OX=8355 GN=dcaf8 PE=2 SV=1	520	4	C	UR	366.483	428.134	446.504	372.913	463.423	406.773
tr|A0A1L8EQ22|A0A1L8EQ22_XENLA	usp7.S	Ubiquitin carboxyl-terminal hydrolase 7 OS=Xenopus laevis OX=8355 GN=usp7.S PE=3 SV=1	521	35	C	UR	7984.6	7010.17	4637.63	4773.71	5088.94	5019.17
sp|Q32NG4|GALD1_XENLA	gatd1	Glutamine amidotransferase-like class 1 domain-containing protein 1 OS=Xenopus laevis OX=8355 GN=gatd1 PE=2 SV=1	522	2	C	UR	373.816	369.164	216.2	309.083	184.444	219.074
tr|A0A1L8GBG1|A0A1L8GBG1_XENLA	rbp2.L	FABP domain-containing protein OS=Xenopus laevis OX=8355 GN=rbp2.L PE=1 SV=1	523	4	C	UR	634.157	863.801	738.208	879.472	1013.3	1070.68
tr|A0A1L8HNG4|A0A1L8HNG4_XENLA	ap3d1.S	AP-3 complex subunit delta OS=Xenopus laevis OX=8355 GN=ap3d1.S PE=1 SV=1	524	2	C	UR	59.0772	125.507	119.432	92.0169	52.944	59.0561
tr|Q6GNS6|Q6GNS6_XENLA	hbs1l.L	HBS1-like protein OS=Xenopus laevis OX=8355 GN=hbs1l.L PE=2 SV=1	525	5	C	UR	880.779	1013.4	942.45	856.464	903.478	957.192
sp|Q6INX4|ENOF1_XENLA	enosf1	Mitochondrial enolase superfamily member 1 OS=Xenopus laevis OX=8355 GN=enosf1 PE=2 SV=1	526	3	C	UR	365.954	399.842	364.452	440.361	421.912	533.282
tr|A0A1L8GZ56|A0A1L8GZ56_XENLA	tubgcp6.L	Uncharacterized protein OS=Xenopus laevis OX=8355 GN=tubgcp6.L PE=1 SV=1	527	37	C	UR	6296.6	7009.97	5746.67	4469.25	2182.15	2221.45
tr|Q9DDA7|Q9DDA7_XENLA	tubgcp6.L	Gamma tubulin ring protein OS=Xenopus laevis OX=8355 GN=tubgcp6.L PE=1 SV=1	527	1	C	UR	225.303	202.5	171.789	131.458	57.0583	99.2507
tr|A0A1L8HKC4|A0A1L8HKC4_XENLA	XELAEV_18008749mg	T-complex protein 1 subunit eta OS=Xenopus laevis OX=8355 GN=XELAEV_18008749mg PE=3 SV=1	528	18	C	UR	3138.5	3121.57	2861.08	2955.84	2725.32	3142.81
tr|Q7ZYP8|Q7ZYP8_XENLA	LOC495278	T-complex protein 1 subunit eta (Fragment) OS=Xenopus laevis OX=8355 GN=LOC495278 PE=2 SV=1	528	5	C	UR	1035.01	927.133	841.367	865.431	870.075	842.736
tr|Q7ZXA7|Q7ZXA7_XENLA	MGC64316	MGC64316 protein (Fragment) OS=Xenopus laevis OX=8355 GN=MGC64316 PE=2 SV=1	530	1	C	UR	58.3058	54.1404	52.9482	71.6684	70.8279	74.4193
tr|A0A1L8HF55|A0A1L8HF55_XENLA	med14.L	Mediator of RNA polymerase II transcription subunit 14 OS=Xenopus laevis OX=8355 GN=med14.L PE=1 SV=1	531	1	C	UR	136.43	124.593	175.427	220.858	154.171	178.075
tr|A0A1L8G7X4|A0A1L8G7X4_XENLA	sult6b1.L	Sulfotransferase OS=Xenopus laevis OX=8355 GN=sult6b1.L PE=1 SV=1	532	1	C	UR	180.094	202.831	209.844	243.085	216.701	275.167
sp|Q6NTZ5|XPO6B_XENLA	xpo6-b	Exportin-6-B OS=Xenopus laevis OX=8355 GN=xpo6-b PE=2 SV=1	533	11	C	UR	2042.55	1845.92	1346.9	1427.81	1400.62	1431
sp|Q53I77|XPO6A_XENLA	xpo6-a	Exportin-6-A OS=Xenopus laevis OX=8355 GN=xpo6-a PE=1 SV=1	533	1	C	UR	80.1549	88.6016	44.6492	41.1049	31.5786	31.7828
tr|A0A1L8I2F3|A0A1L8I2F3_XENLA	XELAEV_18008060mg	Glutaredoxin domain-containing protein OS=Xenopus laevis OX=8355 GN=XELAEV_18008060mg PE=1 SV=1	534	3	C	UR	322.613	305.857	334.657	391.142	387.879	459.209
sp|Q9DE26|RUVB1_XENLA	ruvbl1	RuvB-like 1 OS=Xenopus laevis OX=8355 GN=ruvbl1 PE=2 SV=1	535	22	C	UR	5634.1	3877.53	3546.34	3259.93	2501.47	2421.91
tr|A0A1L8GPP7|A0A1L8GPP7_XENLA	ruvbl1.L	RuvB-like helicase OS=Xenopus laevis OX=8355 GN=ruvbl1.L PE=3 SV=1	535	4	C	UR	702.789	571.478	517.396	431.243	407.758	360.619
tr|A0A1L8F383|A0A1L8F383_XENLA	pls3.S	Uncharacterized protein OS=Xenopus laevis OX=8355 GN=pls3.S PE=1 SV=1	536	14	C	UR	1975.81	2208.39	2160.9	2329.2	2331.28	2385.59
tr|Q6P7I8|Q6P7I8_XENLA	pls3.L	MGC68681 protein OS=Xenopus laevis OX=8355 GN=pls3.L PE=1 SV=1	536	3	C	UR	435.434	414.316	469.98	537.04	435.546	510.762
tr|A0A1L8G9W1|A0A1L8G9W1_XENLA	XELAEV_18027326mg	Dopey_N domain-containing protein OS=Xenopus laevis OX=8355 GN=XELAEV_18027326mg PE=3 SV=1	537	1	C	UR	34.4808	63.3243	34.1079	30.5171	29.3269	23.3798
tr|A0A1L8HCJ5|A0A1L8HCJ5_XENLA	XELAEV_18011457mg	Dopey_N domain-containing protein OS=Xenopus laevis OX=8355 GN=XELAEV_18011457mg PE=3 SV=1	537	1	C	UR	94.4477	93.2369	68.6689	73.6642	89.9408	76.8127
sp|Q6GQE7|ATG3_XENLA	atg3	Ubiquitin-like-conjugating enzyme ATG3 OS=Xenopus laevis OX=8355 GN=atg3 PE=2 SV=1	538	2	C	UR	210.959	330.088	259.409	221.78	269.728	260.349
tr|A0A1L8HF74|A0A1L8HF74_XENLA	XELAEV_18012424mg	Autophagy_act_C domain-containing protein OS=Xenopus laevis OX=8355 GN=XELAEV_18012424mg PE=4 SV=1	538	1	C	UR	116.357	143.787	134.109	144.919	138.493	172.815
tr|Q8AVC0|Q8AVC0_XENLA	shmt1.L	Serine hydroxymethyltransferase OS=Xenopus laevis OX=8355 GN=shmt1.L PE=1 SV=1	539	19	C	UR	2225.99	2190.26	2237.82	2625.75	2506.77	2942.46
tr|A0A1L8FKW5|A0A1L8FKW5_XENLA	XELAEV_18035193mg	Serine/threonine-protein kinase TOR OS=Xenopus laevis OX=8355 GN=XELAEV_18035193mg PE=1 SV=1	540	10	C	UR	1462.96	1230.03	569.614	581.425	566.955	618.632
tr|Q7ZX02|Q7ZX02_XENLA	LOC398565	LOC398565 protein (Fragment) OS=Xenopus laevis OX=8355 GN=LOC398565 PE=2 SV=1	541	1	C	UR	125.374	128.845	105.633	115.859	99.5097	115.684
tr|A0A1L8GK46|A0A1L8GK46_XENLA	XELAEV_18022353mg	55 kDa erythrocyte membrane protein OS=Xenopus laevis OX=8355 GN=XELAEV_18022353mg PE=1 SV=1	542	1	C	UR	202.045	171.254	164.675	190.974	168.182	227.023
tr|A0A1L8ERB5|A0A1L8ERB5_XENLA	XELAEV_18047924mg	P-type domain-containing protein OS=Xenopus laevis OX=8355 GN=XELAEV_18047924mg PE=1 SV=1	543	4	C	UR	423.737	551.19	524.88	552.99	779.082	768.916
tr|Q6DDN9|Q6DDN9_XENLA	cbs.S	Cystathionine beta-synthase OS=Xenopus laevis OX=8355 GN=cbs.S PE=2 SV=1	544	11	C	UR	1851.91	1939.44	1901.46	2148.17	1895.08	2231.62
tr|A0A1L8FA91|A0A1L8FA91_XENLA	ppm1a.L	Protein-serine/threonine phosphatase OS=Xenopus laevis OX=8355 GN=ppm1a.L PE=1 SV=1	545	8	C	UR	1062.67	1008.38	1078.24	1104.24	1046.88	1033.62
tr|Q8AVG2|Q8AVG2_XENLA	ppm1a.S	Protein-serine/threonine phosphatase OS=Xenopus laevis OX=8355 GN=ppm1a.S PE=2 SV=1	545	3	C	UR	238.544	191.078	192.147	248.697	224.812	250.707
tr|Q6GR26|Q6GR26_XENLA	ppm1b.L	Protein-serine/threonine phosphatase OS=Xenopus laevis OX=8355 GN=ppm1b.L PE=2 SV=1	545	1	C	UR	215.219	253.11	221.862	223.73	229.93	239.497
tr|A0A1L8F5Q2|A0A1L8F5Q2_XENLA	prpf4.L	WD_REPEATS_REGION domain-containing protein OS=Xenopus laevis OX=8355 GN=prpf4.L PE=1 SV=1	546	11	C	UR	3146.78	2433.76	1547.87	1363.16	1231.83	1137.44
tr|Q7ZWS4|Q7ZWS4_XENLA	rpn2.S	Dolichyl-diphosphooligosaccharide--protein glycosyltransferase subunit 2 OS=Xenopus laevis OX=8355 GN=rpn2.S PE=2 SV=1	547	4	C	UR	255.114	246.229	205.978	283.023	266.214	313.727
tr|A0A1L8EWY3|A0A1L8EWY3_XENLA	XELAEV_18044959mg	Elongation factor 1-beta OS=Xenopus laevis OX=8355 GN=XELAEV_18044959mg PE=1 SV=1	548	20	C	UR	3440.97	3407.08	3147.85	3614.03	4624.24	4267.82
sp|P29693|EF1D_XENLA	eef1d	Elongation factor 1-delta OS=Xenopus laevis OX=8355 GN=eef1d PE=1 SV=1	548	13	C	UR	1849.39	2171.37	1933.39	2105.3	2715.12	2339.25
tr|A0A1L8G0A6|A0A1L8G0A6_XENLA	eef1d.L	Uncharacterized protein OS=Xenopus laevis OX=8355 GN=eef1d.L PE=3 SV=1	548	4	C	UR	1721.1	1302.35	1269.25	1783.41	2231.69	1663.06
tr|Q6DKL8|Q6DKL8_XENLA	myl6.S	LOC414678 protein OS=Xenopus laevis OX=8355 GN=myl6.S PE=2 SV=1	550	2	C	UR	173.833	140.156	142.522	178.941	211.965	243.762
tr|A0A1L8G690|A0A1L8G690_XENLA	tbcc.L	Tubulin-folding cofactor C OS=Xenopus laevis OX=8355 GN=tbcc.L PE=1 SV=1	551	2	C	UR	141.387	129.808	110.611	124.555	138.188	130.912
sp|P35567|CDK1A_XENLA	cdk1-a	Cyclin-dependent kinase 1-A OS=Xenopus laevis OX=8355 GN=cdk1-a PE=1 SV=1	552	11	C	UR	2960.26	3087.46	2126.41	2099.39	817.776	686.429
sp|P24033|CDK1B_XENLA	cdk1-b	Cyclin-dependent kinase 1-B OS=Xenopus laevis OX=8355 GN=cdk1-b PE=1 SV=2	552	7	C	UR	1924.84	1804.2	1285.71	1382.53	646.963	619.738
sp|P23437|CDK2_XENLA	cdk2	Cyclin-dependent kinase 2 OS=Xenopus laevis OX=8355 GN=cdk2 PE=1 SV=3	552	2	C	UR	318.674	291.396	198.613	213.277	162.959	224.209
sp|Q6GPJ5|LRC40_XENLA	lrrc40	Leucine-rich repeat-containing protein 40 OS=Xenopus laevis OX=8355 GN=lrrc40 PE=2 SV=1	553	8	C	UR	797.717	1034.1	799.259	810.19	703.825	741.764
tr|A0A1L8ETH7|A0A1L8ETH7_XENLA	XELAEV_18043736mg	RING-type domain-containing protein OS=Xenopus laevis OX=8355 GN=XELAEV_18043736mg PE=4 SV=1	554	9	C	UR	1072.31	1347	1143.77	1074.19	1142.21	1055.05
tr|A0A1L8FCW8|A0A1L8FCW8_XENLA	XELAEV_18040743mg	Uncharacterized protein OS=Xenopus laevis OX=8355 GN=XELAEV_18040743mg PE=1 SV=1	554	1	C	UR	67.0339	74.5454	67.3565	74.1148	72.8481	71.7546
tr|A0A1L8H0T7|A0A1L8H0T7_XENLA	vps33b.L	Uncharacterized protein OS=Xenopus laevis OX=8355 GN=vps33b.L PE=1 SV=1	555	2	C	UR	506.749	435.799	259.094	262.785	211.653	237.214
tr|A0A1L8GM22|A0A1L8GM22_XENLA	ipo13.L	Importin-13 OS=Xenopus laevis OX=8355 GN=ipo13.L PE=3 SV=1	556	7	C	UR	894.481	798.685	887.269	811.372	354.739	385.19
tr|A0A1L8GFL1|A0A1L8GFL1_XENLA	ipo13.S	Importin-13 OS=Xenopus laevis OX=8355 GN=ipo13.S PE=1 SV=1	556	2	C	UR	265.556	263.856	215.39	242.917	200.744	220.651
sp|A2VD92|DDX1_XENLA	ddx1	ATP-dependent RNA helicase DDX1 OS=Xenopus laevis OX=8355 GN=ddx1 PE=2 SV=1	557	36	C	UR	7758.29	8077.04	6753.91	5371.86	5384.72	4852.87
tr|A0A1L8HHL7|A0A1L8HHL7_XENLA	sucla2.L	Succinate--CoA ligase [ADP-forming] subunit beta, mitochondrial OS=Xenopus laevis OX=8355 GN=sucla2.L PE=1 SV=1	559	1	C	UR	216.84	297.064	234.936	260.489	250.922	316.587
sp|Q7ZX96|NUP93_XENLA	nup93	Nuclear pore complex protein Nup93 OS=Xenopus laevis OX=8355 GN=nup93 PE=2 SV=1	560	20	C	UR	5287.46	5009.86	2642.92	2698.56	1864.49	1885.45
tr|Q6PA38|Q6PA38_XENLA	polr2e.S	DNA-directed RNA polymerase II subunit E OS=Xenopus laevis OX=8355 GN=polr2e.S PE=1 SV=1	561	1	C	UR	43.7924	39.5837	32.3391	44.0753	40.7152	51.2683
tr|A0A1L8HI21|A0A1L8HI21_XENLA	XELAEV_18013403mg	NAC-A/B domain-containing protein OS=Xenopus laevis OX=8355 GN=XELAEV_18013403mg PE=1 SV=1	562	9	C	UR	1566.6	1727.04	2064.68	2583.69	2901.69	3211.82
sp|Q6PF69|MVP_XENLA	mvp	Major vault protein OS=Xenopus laevis OX=8355 GN=mvp PE=2 SV=1	563	16	C	UR	2025.24	2080.31	1950.59	2245.32	2320.96	2650.43
tr|A0A1L8GBF8|A0A1L8GBF8_XENLA	agfg1.L	Arf-GAP domain-containing protein OS=Xenopus laevis OX=8355 GN=agfg1.L PE=1 SV=1	564	2	C	UR	420.701	450.25	350.003	316.005	297.841	312.851
tr|B3DLM0|B3DLM0_XENLA	acsl4.S	LOC100174803 protein OS=Xenopus laevis OX=8355 GN=acsl4.S PE=2 SV=1	565	7	C	UR	1156.09	1275.54	1420.21	1360.88	779.302	854.779
tr|A0A1L8F7I4|A0A1L8F7I4_XENLA	acsl4.L	AMP-binding domain-containing protein OS=Xenopus laevis OX=8355 GN=acsl4.L PE=1 SV=1	565	4	C	UR	521.263	521.398	531.668	583.985	285.517	337.721
sp|Q6PA15|CCD22_XENLA	ccdc22	Coiled-coil domain-containing protein 22 OS=Xenopus laevis OX=8355 GN=ccdc22 PE=2 SV=1	566	4	C	UR	535.142	409.372	337.06	407.323	240.006	205.566
tr|A0A1L8HBS7|A0A1L8HBS7_XENLA	XELAEV_18011184mg	Uncharacterized protein OS=Xenopus laevis OX=8355 GN=XELAEV_18011184mg PE=1 SV=1	567	5	C	UR	347.437	350.097	419.982	352.597	285.579	254.372
tr|A0A1L8GJD8|A0A1L8GJD8_XENLA	XELAEV_18022090mg	AP-2 complex subunit alpha OS=Xenopus laevis OX=8355 GN=XELAEV_18022090mg PE=1 SV=1	568	28	C	UR	6551.37	5954.35	5884.08	5638.69	3453.43	3281.59
tr|A0A1L8GDH4|A0A1L8GDH4_XENLA	XELAEV_18024292mg	Alpha_adaptinC2 domain-containing protein (Fragment) OS=Xenopus laevis OX=8355 GN=XELAEV_18024292mg PE=3 SV=1	568	9	C	UR	1522.05	1574.65	1619.67	1520.85	999.148	934.461
tr|A0A1L8FNQ2|A0A1L8FNQ2_XENLA	XELAEV_18036192mg	AP-2 complex subunit alpha OS=Xenopus laevis OX=8355 GN=XELAEV_18036192mg PE=1 SV=1	568	13	C	UR	1751.9	1800.6	2202.69	2099.2	1305.81	1255.94
tr|A0A1L8FLB0|A0A1L8FLB0_XENLA	XB5896631.L	Uncharacterized protein OS=Xenopus laevis OX=8355 GN=XB5896631.L PE=1 SV=1	569	1	C	UR	91.1878	95.7742	104.779	103.447	113.171	119.536
tr|A0A1L8H8A2|A0A1L8H8A2_XENLA	XELAEV_18015366mg	Mic1 domain-containing protein OS=Xenopus laevis OX=8355 GN=XELAEV_18015366mg PE=4 SV=1	570	3	C	UR	287.371	216.892	192.831	195.777	147.167	149.323
tr|A0A1L8HG57|A0A1L8HG57_XENLA	rmc1.L	Mic1 domain-containing protein OS=Xenopus laevis OX=8355 GN=rmc1.L PE=4 SV=1	570	2	C	UR	182.799	183.377	175.275	185.884	124.545	112.749
tr|A0A1L8FXW1|A0A1L8FXW1_XENLA	XELAEV_180316181mg	Uncharacterized protein (Fragment) OS=Xenopus laevis OX=8355 GN=XELAEV_180316181mg PE=1 SV=1	571	2	C	UR	150.859	158.376	128.413	104.451	99.0787	102.435
tr|A0A1L8ER33|A0A1L8ER33_XENLA	stub1.S	Uncharacterized protein OS=Xenopus laevis OX=8355 GN=stub1.S PE=4 SV=1	572	4	C	UR	617.605	508.204	283.551	374.703	467.255	387.85
tr|A0A1L8FWE8|A0A1L8FWE8_XENLA	pik3r4.L	Non-specific serine/threonine protein kinase OS=Xenopus laevis OX=8355 GN=pik3r4.L PE=4 SV=1	573	7	C	UR	685.083	664.323	680.203	615.316	430.249	407.913
tr|A0A1L8FRJ7|A0A1L8FRJ7_XENLA	pik3r4.S	Non-specific serine/threonine protein kinase OS=Xenopus laevis OX=8355 GN=pik3r4.S PE=1 SV=1	573	2	C	UR	273.487	299.278	314.181	264.721	144.026	140.993
tr|A0A1L8GLE9|A0A1L8GLE9_XENLA	AARS	Alanine--tRNA ligase OS=Xenopus laevis OX=8355 GN=AARS PE=1 SV=1	574	47	C	UR	6200.47	7212.98	7279.54	8129.58	8646.59	9745.16
tr|Q9W627|Q9W627_XENLA		Ku80 autoantigen homologue (Fragment) OS=Xenopus laevis OX=8355 PE=2 SV=1	576	6	C	UR	424.496	414.921	378.86	479.972	496.577	562.024
tr|A0A1L8GAB6|A0A1L8GAB6_XENLA	gmps.L	Glutamine amidotransferase OS=Xenopus laevis OX=8355 GN=gmps.L PE=1 SV=1	577	17	C	UR	3234.9	2756.64	2621.06	2571.26	2929.09	2943.09
tr|A0A1L8G493|A0A1L8G493_XENLA	gmps.S	Glutamine amidotransferase OS=Xenopus laevis OX=8355 GN=gmps.S PE=1 SV=1	577	4	C	UR	454.475	408.802	373.399	340.227	427.788	469.147
tr|Q6GP73|Q6GP73_XENLA	clic1.L	Chloride intracellular channel protein OS=Xenopus laevis OX=8355 GN=clic1.L PE=1 SV=1	579	4	C	UR	430.694	503.007	525.94	635.23	586.823	644.761
tr|A0A1L8F3N4|A0A1L8F3N4_XENLA	clic1.S	Chloride intracellular channel protein OS=Xenopus laevis OX=8355 GN=clic1.S PE=1 SV=1	579	1	C	UR	59.5402	61.6634	60.5008	70.5361	74.6636	82.4672
tr|Q498F1|Q498F1_XENLA	ubr2.S	E3 ubiquitin-protein ligase OS=Xenopus laevis OX=8355 GN=ubr2.S PE=2 SV=1	580	53	C	UR	10856.5	7929.44	7261.76	6378.88	8448.43	5893.55
tr|A0A1L8G661|A0A1L8G661_XENLA	XELAEV_18026190mg	E3 ubiquitin-protein ligase OS=Xenopus laevis OX=8355 GN=XELAEV_18026190mg PE=1 SV=1	580	13	C	UR	2524.62	1785.25	1700.1	1484.36	2043.93	1497.7
tr|Q7ZY22|Q7ZY22_XENLA	smarcc1.L	Smarcc1 protein OS=Xenopus laevis OX=8355 GN=smarcc1.L PE=2 SV=2	581	9	C	UR	845.552	867.25	835.613	882.798	911.281	947.301
tr|Q6IRQ8|Q6IRQ8_XENLA	pgam1.L	Phosphoglycerate mutase OS=Xenopus laevis OX=8355 GN=pgam1.L PE=1 SV=1	582	10	C	UR	1001.5	1001.93	1027.94	1129.69	1232.57	1176.43
sp|Q6NRP2|PSME4_XENLA	psme4	Proteasome activator complex subunit 4 OS=Xenopus laevis OX=8355 GN=psme4 PE=2 SV=1	583	2	C	UR	281.538	248.337	234.473	237.721	317.778	281.465
tr|A0A1L8HLX8|A0A1L8HLX8_XENLA	otud4.S	Ubiquitinyl hydrolase 1 OS=Xenopus laevis OX=8355 GN=otud4.S PE=1 SV=1	584	3	C	UR	343.287	398.533	316.242	384.559	372.268	436.906
tr|A0A1L8H976|A0A1L8H976_XENLA	XELAEV_18015706mg	RCR-type E3 ubiquitin transferase OS=Xenopus laevis OX=8355 GN=XELAEV_18015706mg PE=3 SV=1	585	3	C	UR	285.342	338.971	501.459	402.296	353.174	348.925
sp|P03001|TF3A_XENLA	gtf3a	Transcription factor IIIA OS=Xenopus laevis OX=8355 GN=gtf3a PE=1 SV=2	586	2	C	UR	286.323	472.355	508.073	570.425	548.525	715.12
tr|A0A1L8HGV2|A0A1L8HGV2_XENLA	mitd1.L	MIT domain-containing protein OS=Xenopus laevis OX=8355 GN=mitd1.L PE=1 SV=1	587	1	C	UR	265.03	256.44	137.121	164.258	86.4087	75.3549
sp|Q6DE97|CN10A_XENLA	cnot10-a	CCR4-NOT transcription complex subunit 10-A OS=Xenopus laevis OX=8355 GN=cnot10-a PE=2 SV=1	588	5	C	UR	506.381	945.081	875.398	587.064	546.654	530.425
tr|A0A1L8G9N6|A0A1L8G9N6_XENLA	XELAEV_18027277mg	Midasin OS=Xenopus laevis OX=8355 GN=XELAEV_18027277mg PE=1 SV=1	589	54	C	UR	5048.54	5631.76	13058.3	11291.6	7734.9	7332.27
tr|A0A1L8G6W5|A0A1L8G6W5_XENLA	slc4a1ap.L	FHA domain-containing protein OS=Xenopus laevis OX=8355 GN=slc4a1ap.L PE=4 SV=1	590	2	C	UR	255.143	271.026	320.11	270.95	378.512	361.307
tr|A0A1L8G119|A0A1L8G119_XENLA	XELAEV_18028590mg	FHA domain-containing protein OS=Xenopus laevis OX=8355 GN=XELAEV_18028590mg PE=1 SV=1	590	2	C	UR	93.2034	89.2412	129.209	101.658	135.804	131.726
tr|A0A1L8H815|A0A1L8H815_XENLA	ap2b1.S	AP complex subunit beta OS=Xenopus laevis OX=8355 GN=ap2b1.S PE=1 SV=1	591	28	C	UR	4923.32	5335.02	5527.97	5348.2	3084.38	2749.36
tr|A0A1L8I0E8|A0A1L8I0E8_XENLA	ap1b1.L	AP complex subunit beta OS=Xenopus laevis OX=8355 GN=ap1b1.L PE=3 SV=1	591	17	C	UR	3102.79	2647.08	1913.27	1877.27	1009.77	988.905
tr|A1L2H5|A1L2H5_XENLA	ap1b1.S	AP complex subunit beta OS=Xenopus laevis OX=8355 GN=ap1b1.S PE=2 SV=1	591	6	C	UR	864.176	792.389	572.666	549.001	327.798	318.455
tr|A2RRW9|A2RRW9_XENLA	cops4.L	COP9 signalosome complex subunit 4 OS=Xenopus laevis OX=8355 GN=cops4.L PE=1 SV=1	593	7	C	UR	597.609	584.72	563.548	807.003	706.211	806.988
tr|A0A1L8GRS2|A0A1L8GRS2_XENLA	vps41.S	Vacuolar protein sorting-associated protein 41 homolog OS=Xenopus laevis OX=8355 GN=vps41.S PE=1 SV=1	594	3	C	UR	406.796	327.595	335.91	339.068	356.66	341.055
tr|A0A1L8HD75|A0A1L8HD75_XENLA	XELAEV_18011686mg	Sarcosine oxidase OS=Xenopus laevis OX=8355 GN=XELAEV_18011686mg PE=1 SV=1	595	9	C	UR	959.25	1042.76	4019.7	4196.48	881.764	904.038
tr|A0A1L8F2X9|A0A1L8F2X9_XENLA	XELAEV_18042205mg	COMM domain-containing protein 5 OS=Xenopus laevis OX=8355 GN=XELAEV_18042205mg PE=1 SV=1	596	10	C	UR	1933.79	1505.41	1624.95	1325.2	832.571	709.804
tr|A0A1L8F9T2|A0A1L8F9T2_XENLA	psmc6.L	AAA domain-containing protein OS=Xenopus laevis OX=8355 GN=psmc6.L PE=1 SV=1	597	7	C	UR	859.094	716.883	727.222	770.812	714.936	795.438
tr|A0A1L8GPM8|A0A1L8GPM8_XENLA	thumpd3.L	THUMP domain-containing protein OS=Xenopus laevis OX=8355 GN=thumpd3.L PE=1 SV=1	598	7	C	UR	736.985	949.39	1094.23	1010.68	1340.98	1286.75
tr|A0A1L8HB15|A0A1L8HB15_XENLA	XELAEV_18016359mg	Alpha-1,3-glucosyltransferase OS=Xenopus laevis OX=8355 GN=XELAEV_18016359mg PE=1 SV=1	600	4	C	UR	651.148	710.69	637.798	954.995	777.948	942.462
tr|A0A1L8HPJ0|A0A1L8HPJ0_XENLA	rnf31.S	RBR-type E3 ubiquitin transferase OS=Xenopus laevis OX=8355 GN=rnf31.S PE=1 SV=1	601	22	C	UR	3171.2	2628.38	3717.65	3410.43	3143	2467.73
tr|Q6GN89|Q6GN89_XENLA	XDRP1	XDRP1 protein OS=Xenopus laevis OX=8355 GN=XDRP1 PE=2 SV=1	602	6	C	UR	650.842	730.415	868.971	849.516	791.03	823.726
tr|A0A1L8HYC0|A0A1L8HYC0_XENLA	XELAEV_18006928mg	Uncharacterized protein OS=Xenopus laevis OX=8355 GN=XELAEV_18006928mg PE=1 SV=1	602	3	C	UR	653.377	531.803	625.181	509.438	577.979	612.731
tr|A0A1L8HPE5|A0A1L8HPE5_XENLA	ubqln1.S	Uncharacterized protein OS=Xenopus laevis OX=8355 GN=ubqln1.S PE=4 SV=1	602	2	C	UR	147.057	130.31	144.812	124.985	141.241	160.916
tr|A0A1L8GTA3|A0A1L8GTA3_XENLA	XELAEV_18020742mg	Sorting nexin-1 OS=Xenopus laevis OX=8355 GN=XELAEV_18020742mg PE=1 SV=1	603	8	C	UR	860.508	897.087	840.818	944.111	1006.54	1010.43
tr|Q7SY62|Q7SY62_XENLA	snx2.S	Sorting nexin-2 OS=Xenopus laevis OX=8355 GN=snx2.S PE=2 SV=1	603	3	C	UR	354.132	350.745	353.839	415.2	518.871	463.858
tr|Q6GPL6|Q6GPL6_XENLA	gca.L	MGC83560 protein OS=Xenopus laevis OX=8355 GN=gca.L PE=1 SV=1	604	3	C	UR	481.718	407.297	323.246	481.185	433.023	516.442
tr|A2VDA2|A2VDA2_XENLA	sri.L	LOC100037199 protein OS=Xenopus laevis OX=8355 GN=sri.L PE=2 SV=1	604	2	C	UR	354.65	275.503	301.255	386.958	318.743	360.101
tr|A0A1L8FQX5|A0A1L8FQX5_XENLA	XELAEV_18032951mg	Uncharacterized protein OS=Xenopus laevis OX=8355 GN=XELAEV_18032951mg PE=1 SV=1	604	6	C	UR	1415.57	1421.85	1303.79	1700.24	1775.48	1824.1
tr|A0A1L8EP19|A0A1L8EP19_XENLA	XELAEV_18047136mg	Uncharacterized protein OS=Xenopus laevis OX=8355 GN=XELAEV_18047136mg PE=4 SV=1	604	8	C	UR	1492.32	1233.42	797.632	1054.87	967.134	1092.77
tr|A0A1L8GJK8|A0A1L8GJK8_XENLA	XELAEV_18022141mg	Transaldolase OS=Xenopus laevis OX=8355 GN=XELAEV_18022141mg PE=1 SV=1	605	10	C	UR	1157.47	1468.62	1592.9	2000.87	2075.73	2357.75
tr|Q6NRT7|Q6NRT7_XENLA	akt1s1.S	MGC81452 protein OS=Xenopus laevis OX=8355 GN=akt1s1.S PE=2 SV=1	606	2	C	UR	469.96	346.309	198.427	183.544	209.888	234.979
sp|Q91783|KI11A_XENLA	kif11-a	Kinesin-like protein KIF11-A OS=Xenopus laevis OX=8355 GN=kif11-a PE=1 SV=1	607	4	C	UR	800.93	836.04	721.511	720.355	790.983	817.558
tr|A0A1L8FEF2|A0A1L8FEF2_XENLA	XELAEV_18036889mg	Kinesin motor domain-containing protein OS=Xenopus laevis OX=8355 GN=XELAEV_18036889mg PE=3 SV=1	607	5	C	UR	791.992	964.956	812.641	743.699	884.202	873.827
tr|Q6NTR4|Q6NTR4_XENLA	rpl14.S	60S ribosomal protein L14 OS=Xenopus laevis OX=8355 GN=rpl14.S PE=2 SV=1	608	11	C	UR	984.405	1216.19	1732.98	2076.87	2081.86	2192.99
tr|A0A1L8F1N1|A0A1L8F1N1_XENLA	nup188.S	Uncharacterized protein OS=Xenopus laevis OX=8355 GN=nup188.S PE=1 SV=1	609	26	C	UR	7767.78	5588.24	2554.32	2683.18	1837.86	1822.88
tr|A0A1L8HVE4|A0A1L8HVE4_XENLA	XELAEV_18005836mg	Albumin domain-containing protein OS=Xenopus laevis OX=8355 GN=XELAEV_18005836mg PE=1 SV=1	610	2	C	UR	1516.93	890.88	1089.61	741.917	526.611	335.146
tr|Q6DKB1|Q6DKB1_XENLA	park7.S	Maillard deglycase OS=Xenopus laevis OX=8355 GN=park7.S PE=2 SV=1	611	8	C	UR	873.323	974.299	1159.81	1359.14	1426.53	2031.16
tr|Q90XE4|Q90XE4_XENLA		Maillard deglycase OS=Xenopus laevis OX=8355 PE=2 SV=1	611	3	C	UR	714.325	798.809	966.668	1236.1	1146.22	1533.05
tr|A0A1L8HH73|A0A1L8HH73_XENLA	uggt2.L	Uncharacterized protein OS=Xenopus laevis OX=8355 GN=uggt2.L PE=1 SV=1	612	5	C	UR	468.213	472.073	456.178	499.38	451.893	483
tr|A0A1L8H931|A0A1L8H931_XENLA	XELAEV_18015664mg	Uncharacterized protein OS=Xenopus laevis OX=8355 GN=XELAEV_18015664mg PE=3 SV=1	612	1	C	UR	130.273	105.499	104.572	102.148	124.626	125.931
tr|A0A1L8HK34|A0A1L8HK34_XENLA	XELAEV_18008662mg	Programmed cell death protein 4 OS=Xenopus laevis OX=8355 GN=XELAEV_18008662mg PE=3 SV=1	613	5	C	UR	835.831	1133.24	1076.43	1333.33	1321.43	1405.66
tr|Q0P3Q4|Q0P3Q4_XENLA	metap2.S	Methionine aminopeptidase 2 OS=Xenopus laevis OX=8355 GN=metap2.S PE=2 SV=1	614	1	C	UR	214.728	264.34	295.343	341.928	340.797	347.868
tr|A0A1L8GYF2|A0A1L8GYF2_XENLA	METAP2	Methionine aminopeptidase 2 OS=Xenopus laevis OX=8355 GN=METAP2 PE=1 SV=1	614	7	C	UR	584.034	613.228	727.71	769.736	923.441	947.465
tr|A0A1L8GD17|A0A1L8GD17_XENLA	cad.L	Aspartate carbamoyltransferase OS=Xenopus laevis OX=8355 GN=cad.L PE=1 SV=1	615	44	C	UR	5430.5	6450.74	9140.75	7943.22	7324.26	7402.35
tr|Q6INK1|Q6INK1_XENLA	cpne1.S	MGC82415 protein OS=Xenopus laevis OX=8355 GN=cpne1.S PE=2 SV=1	616	18	C	UR	2957.96	3190.15	3347.53	3456.85	3756.79	4341.66
tr|Q6P7H2|Q6P7H2_XENLA	cpne1.L	MGC68823 protein OS=Xenopus laevis OX=8355 GN=cpne1.L PE=1 SV=1	616	14	C	UR	1842.94	2318.59	2428.1	2399.14	2781.68	3396.25
tr|A0A1L8FTG7|A0A1L8FTG7_XENLA	cpne3.S	Uncharacterized protein OS=Xenopus laevis OX=8355 GN=cpne3.S PE=1 SV=1	616	7	C	UR	876.824	775.767	761.534	773.901	945.649	996.911
tr|Q3B8B3|Q3B8B3_XENLA	uchl1.S	Ubiquitin carboxyl-terminal hydrolase OS=Xenopus laevis OX=8355 GN=uchl1.S PE=2 SV=1	617	3	C	UR	351	359.509	299.984	355.189	348.628	391.533
tr|A0A1L8HTQ5|A0A1L8HTQ5_XENLA	uchl1.L	Ubiquitin carboxyl-terminal hydrolase OS=Xenopus laevis OX=8355 GN=uchl1.L PE=1 SV=1	617	8	C	UR	1141.95	1220.04	1183.51	1405.42	1495.25	1561.3
tr|A0A1L8HII4|A0A1L8HII4_XENLA	XELAEV_18013593mg	Uncharacterized protein OS=Xenopus laevis OX=8355 GN=XELAEV_18013593mg PE=1 SV=1	618	7	C	UR	818.621	856.547	970.341	1126.54	1179.75	1305.79
tr|A0A1L8HA57|A0A1L8HA57_XENLA	XELAEV_18016056mg	Uncharacterized protein OS=Xenopus laevis OX=8355 GN=XELAEV_18016056mg PE=3 SV=1	618	2	C	UR	195.317	206.433	212.577	255.291	235.291	310.022
tr|A0A1L8HBN8|A0A1L8HBN8_XENLA	XELAEV_18016554mg	Uncharacterized protein OS=Xenopus laevis OX=8355 GN=XELAEV_18016554mg PE=1 SV=1	619	27	C	UR	3374.7	3419.76	3911.83	3600.85	4112.24	4244.26
tr|Q5FWK8|Q5FWK8_XENLA	alox12b.S	MGC85124 protein OS=Xenopus laevis OX=8355 GN=alox12b.S PE=2 SV=1	619	3	C	UR	347.101	298.116	307.973	293.509	301.648	325.711
sp|O42587|PR6AA_XENLA	psmc3-a	26S proteasome regulatory subunit 6A-A OS=Xenopus laevis OX=8355 GN=psmc3-a PE=2 SV=2	620	17	C	UR	1828.79	1805.91	1984.08	2182.2	2183.83	2190.68
sp|O42586|PR6AB_XENLA	psmc3-b	26S proteasome regulatory subunit 6A-B OS=Xenopus laevis OX=8355 GN=psmc3-b PE=2 SV=1	620	1	C	UR	163.115	169.793	174.204	229.661	216.482	239.104
sp|Q7T102|CCZ1_XENLA	ccz1	Vacuolar fusion protein CCZ1 homolog OS=Xenopus laevis OX=8355 GN=ccz1 PE=2 SV=1	621	5	C	UR	562.364	480.818	420.915	416.689	405.335	416.421
tr|A0A1L8EY01|A0A1L8EY01_XENLA	ccz1b.L	Uncharacterized protein OS=Xenopus laevis OX=8355 GN=ccz1b.L PE=3 SV=1	621	1	C	UR	61.5019	42.1329	47.998	48.6166	35.1773	36.0099
tr|Q8AVM2|Q8AVM2_XENLA	eif5.S	Eukaryotic translation initiation factor 5 OS=Xenopus laevis OX=8355 GN=eif5.S PE=2 SV=1	622	7	C	UR	436.023	556.77	625.815	671.599	772.091	753.894
tr|Q7ZXW3|Q7ZXW3_XENLA	naa10.S	Ard1-prov protein OS=Xenopus laevis OX=8355 GN=naa10.S PE=2 SV=1	623	3	C	UR	509.126	563.726	750.788	674.282	869.991	898.768
tr|Q7ZYD7|Q7ZYD7_XENLA	aimp2.L	Aminoacyl tRNA synthase complex-interacting multifunctional protein 2 OS=Xenopus laevis OX=8355 GN=aimp2.L PE=2 SV=1	624	2	C	UR	476.687	555.375	698.874	849.928	598.258	632.099
tr|A0A1L8H0P6|A0A1L8H0P6_XENLA	XELAEV_18018281mg	Tr-type G domain-containing protein OS=Xenopus laevis OX=8355 GN=XELAEV_18018281mg PE=1 SV=1	625	6	C	UR	1426.68	1245.31	700.372	678.034	806.273	769.291
sp|Q7ZXD6|ADM1B_XENLA	adrm1-b	Proteasomal ubiquitin receptor ADRM1-B OS=Xenopus laevis OX=8355 GN=adrm1-b PE=2 SV=1	626	8	C	UR	1583.9	2120.46	2859	2419.42	3436.46	2980.3
sp|Q6GN67|ADM1A_XENLA	adrm1-a	Proteasomal ubiquitin receptor ADRM1-A OS=Xenopus laevis OX=8355 GN=adrm1-a PE=2 SV=2	626	4	C	UR	292.068	217.57	200.157	239.655	227.445	262.108
tr|A0A1L8GDB2|A0A1L8GDB2_XENLA	XELAEV_18024204mg	Uncharacterized protein OS=Xenopus laevis OX=8355 GN=XELAEV_18024204mg PE=1 SV=1	627	11	C	UR	1156.68	1045.72	1040.54	1002.47	1068.95	1092.73
tr|A0A1L8GJU6|A0A1L8GJU6_XENLA	XELAEV_18022251mg	Uncharacterized protein OS=Xenopus laevis OX=8355 GN=XELAEV_18022251mg PE=4 SV=1	627	2	C	UR	459.532	419.54	381.98	369.997	400.025	412.776
tr|A0A1L8HF79|A0A1L8HF79_XENLA	nme7.L	Nucleoside diphosphate kinase 7 OS=Xenopus laevis OX=8355 GN=nme7.L PE=3 SV=1	628	6	C	UR	1093.3	1169.21	869.405	870.432	399.804	373.232
tr|A0A1L8HQG2|A0A1L8HQG2_XENLA	trmt2a.S	RRM domain-containing protein OS=Xenopus laevis OX=8355 GN=trmt2a.S PE=1 SV=1	629	1	C	UR	60.429	66.526	51.1373	53.8987	56.4991	62.6802
tr|Q5XGY2|Q5XGY2_XENLA	rragc.S	Ras-related GTP-binding protein OS=Xenopus laevis OX=8355 GN=rragc.S PE=2 SV=1	631	1	C	UR	147.88	122.356	82.6482	103.669	125.719	120.316
sp|P51115|FXR1A_XENLA	fxr1-a	Fragile X mental retardation syndrome-related protein 1 homolog A OS=Xenopus laevis OX=8355 GN=fxr1-a PE=1 SV=2	632	13	C	UR	2689.75	2556.27	1928.28	1659.06	1550.32	1641.05
tr|Q7ZXX4|Q7ZXX4_XENLA	aldh9a1.S	MGC52697 protein OS=Xenopus laevis OX=8355 GN=aldh9a1.S PE=1 SV=1	633	17	C	UR	1973.6	2178.89	2333.54	2343.5	2823.38	3000.05
tr|A0A1L8I1V2|A0A1L8I1V2_XENLA	zfyve16.L	Zinc finger FYVE domain-containing protein OS=Xenopus laevis OX=8355 GN=zfyve16.L PE=1 SV=1	634	3	C	UR	137.6	122.111	144.167	140.965	168.501	181.504
sp|Q5U249|ELYS_XENLA	ahctf1	Protein ELYS OS=Xenopus laevis OX=8355 GN=ahctf1 PE=1 SV=1	635	1	C	UR	86.7978	112.866	127.563	87.6496	91.9501	87.7798
tr|Q6P416|Q6P416_XENLA	tprg1.L	MGC68514 protein OS=Xenopus laevis OX=8355 GN=tprg1.L PE=1 SV=1	636	3	C	UR	312.956	292.756	272.62	335.772	308.469	285.752
tr|A0A1L8EPM2|A0A1L8EPM2_XENLA	ehhadh.S	Enoyl-CoA hydratase OS=Xenopus laevis OX=8355 GN=ehhadh.S PE=1 SV=1	637	12	C	UR	796.666	719.72	1340.28	1591.24	706.693	721.462
tr|A0A1L8HXV2|A0A1L8HXV2_XENLA	mtap.L	S-methyl-5'-thioadenosine phosphorylase OS=Xenopus laevis OX=8355 GN=mtap.L PE=1 SV=1	638	14	C	UR	1751.5	1678.4	1792.31	2038.35	2017.48	2240.84
tr|Q5U5D5|Q5U5D5_XENLA	lnpep.L	LOC495293 protein OS=Xenopus laevis OX=8355 GN=lnpep.L PE=2 SV=1	639	7	C	UR	635.312	549.719	548.429	559.649	1031.15	952.256
sp|A5H447|ZYX_XENLA	zyx	Zyxin OS=Xenopus laevis OX=8355 GN=zyx PE=1 SV=1	640	3	C	UR	261.758	288.416	325.426	337.67	370.348	401.339
sp|Q5XH07|THNS2_XENLA	thnsl2	Threonine synthase-like 2 OS=Xenopus laevis OX=8355 GN=thnsl2 PE=2 SV=1	641	6	C	UR	1151.54	976.601	829.25	857.825	869.006	859.086
tr|A0A1L8FQN1|A0A1L8FQN1_XENLA	kif5b.S	Kinesin-like protein OS=Xenopus laevis OX=8355 GN=kif5b.S PE=1 SV=1	642	17	C	UR	2047.16	2061.7	2182.32	2217.32	2360.2	2462.12
tr|A0A1L8FVE2|A0A1L8FVE2_XENLA	kif5b.L	Kinesin-like protein OS=Xenopus laevis OX=8355 GN=kif5b.L PE=1 SV=1	642	2	C	UR	221.441	241.657	238.315	264.576	299.144	294.592
tr|Q5XGW5|Q5XGW5_XENLA	vps11.S	Vacuolar protein sorting-associated protein 11 homolog OS=Xenopus laevis OX=8355 GN=vps11.S PE=1 SV=1	643	10	C	UR	865.233	805.102	859.666	810.502	751.177	682.48
tr|Q6DJM4|Q6DJM4_XENLA	anxa1.1.L	Annexin OS=Xenopus laevis OX=8355 GN=anxa1.1.L PE=2 SV=1	644	7	C	UR	440.376	562.949	573.053	849.831	738.145	894.377
tr|A0A1L8G4G8|A0A1L8G4G8_XENLA	hdlbp.S	Uncharacterized protein OS=Xenopus laevis OX=8355 GN=hdlbp.S PE=1 SV=1	645	10	C	UR	1101.91	1254.05	1365.52	1405.56	1252.85	1410.28
tr|A0A1L8GAR0|A0A1L8GAR0_XENLA	hdlbp.L	Uncharacterized protein OS=Xenopus laevis OX=8355 GN=hdlbp.L PE=1 SV=1	645	24	C	UR	3289.54	3797.41	4522	4398.65	4060.64	4483.14
sp|A5D8Q0|XIAP_XENLA	xiap	E3 ubiquitin-protein ligase XIAP OS=Xenopus laevis OX=8355 GN=xiap PE=2 SV=2	646	11	C	UR	1820.04	1697.34	1260.18	1220.07	1585.57	1259.74
tr|A0A1L8F418|A0A1L8F418_XENLA	EIF3K	Eukaryotic translation initiation factor 3 subunit K OS=Xenopus laevis OX=8355 GN=EIF3K PE=3 SV=1	647	4	C	UR	428.411	422.166	510.121	663.627	654.045	750.382
sp|Q6GQD3|RB24A_XENLA	rbm24-a	RNA-binding protein 24-A OS=Xenopus laevis OX=8355 GN=rbm24-a PE=2 SV=1	648	1	C	UR	166.892	165.976	114.032	74.8831	89.7524	79.1319
tr|Q6PE96|Q6PE96_XENLA	psma3.S	Proteasome subunit alpha type OS=Xenopus laevis OX=8355 GN=psma3.S PE=2 SV=1	649	10	C	UR	1898.97	1649.16	1959.64	1435	2558.48	1815.06
tr|Q8AVD2|Q8AVD2_XENLA	psma3.L	Proteasome subunit alpha type OS=Xenopus laevis OX=8355 GN=psma3.L PE=1 SV=1	649	1	C	UR	274.448	301.13	309.408	335.521	469.431	421.015
tr|A0A1L8GIB5|A0A1L8GIB5_XENLA	pik3c2a.L	Phosphatidylinositol-4-phosphate 3-kinase OS=Xenopus laevis OX=8355 GN=pik3c2a.L PE=3 SV=1	650	9	C	UR	1671.55	1483.55	635.05	633.58	466.625	482.129
tr|Q7ZYE9|Q7ZYE9_XENLA	hnrnpab.L	Hnrpab-prov protein OS=Xenopus laevis OX=8355 GN=hnrnpab.L PE=1 SV=1	651	4	C	UR	337.747	356.672	318.377	311.98	318.913	339.154
tr|A0A7M4CIF6|A0A7M4CIF6_XENLA	hnrnpab	Nuclear ribonucleoprotein A/B L-like protein isoform X2 OS=Xenopus laevis OX=8355 GN=hnrnpab PE=2 SV=1	651	1	C	UR	174.44	147.859	119.096	89.4901	114.108	120.946
tr|Q6GM69|Q6GM69_XENLA	hnrnpab.S	Vg1 mRNA binding protein 40 OS=Xenopus laevis OX=8355 GN=hnrnpab.S PE=1 SV=1	651	12	C	UR	3034.91	3340.19	2652.06	2030.82	2420.98	2359.67
sp|Q801S3|RS3AA_XENLA	rps3a-a	40S ribosomal protein S3a-A OS=Xenopus laevis OX=8355 GN=rps3a-a PE=2 SV=3	652	19	C	UR	2597.63	3331.67	4437.06	5823.86	5565.36	6038.12
tr|Q7ZYQ8|Q7ZYQ8_XENLA	RPL18A	60S ribosomal protein L18a (Fragment) OS=Xenopus laevis OX=8355 GN=RPL18A PE=2 SV=1	653	7	C	UR	850.983	1033.8	1387.12	1407.13	1441.01	1482.16
tr|A0A1L8GY92|A0A1L8GY92_XENLA	XELAEV_18017414mg	WD_REPEATS_REGION domain-containing protein OS=Xenopus laevis OX=8355 GN=XELAEV_18017414mg PE=1 SV=1	654	38	C	UR	11906.9	10405.5	7858.71	6009.55	2351.39	2320.2
tr|Q641F4|Q641F4_XENLA	nedd1.L	MGC81767 protein OS=Xenopus laevis OX=8355 GN=nedd1.L PE=2 SV=1	654	2	C	UR	439.48	350.742	257.862	210.979	35.9846	35.2258
tr|A0A1L8GUQ0|A0A1L8GUQ0_XENLA	nedd1.S	WD_REPEATS_REGION domain-containing protein OS=Xenopus laevis OX=8355 GN=nedd1.S PE=4 SV=1	654	2	C	UR	1140.28	946.344	709.121	558.033	349.408	339.176
tr|A0A2Z6G143|A0A2Z6G143_XENLA	smarcad1b	SWI/SNF-related, matrix-associated actin-dependent regulator of chromatin, subfamily a, containing DEAD/H box 1, isoform b OS=Xenopus laevis OX=8355 GN=smarcad1b PE=2 SV=1	655	2	C	UR	164.693	194.307	180.683	139.623	145.989	158.544
tr|Q05AW3|Q05AW3_XENLA	nup43.S	MGC154553 protein OS=Xenopus laevis OX=8355 GN=nup43.S PE=2 SV=1	656	7	C	UR	782.012	822.206	819.016	831.073	840.708	812.82
sp|P29054|TF2B_XENLA	gtf2b	Transcription initiation factor IIB OS=Xenopus laevis OX=8355 GN=gtf2b PE=2 SV=1	657	4	C	UR	276.789	344.615	558.729	417.111	356.671	381.771
sp|P26696|MK01_XENLA	mapk1	Mitogen-activated protein kinase 1 OS=Xenopus laevis OX=8355 GN=mapk1 PE=1 SV=3	659	17	C	UR	6046.17	4608.75	1824.07	2185.33	2354.62	2273.98
tr|A0A1L8HJ40|A0A1L8HJ40_XENLA	XELAEV_18013768mg	Protein kinase domain-containing protein OS=Xenopus laevis OX=8355 GN=XELAEV_18013768mg PE=1 SV=1	660	8	C	UR	1132.33	1045.67	1412.88	1299.56	1358.96	1088.14
tr|Q7SYR8|Q7SYR8_XENLA	txndc9.L	Apacd-prov protein OS=Xenopus laevis OX=8355 GN=txndc9.L PE=2 SV=1	661	9	C	UR	1324.48	1491.19	1322.95	1744.1	1641.69	1825.35
sp|Q6DJI8|EI3GA_XENLA	eif3g-a	Eukaryotic translation initiation factor 3 subunit G-A OS=Xenopus laevis OX=8355 GN=eif3g-a PE=2 SV=1	662	6	C	UR	1600.11	1262.43	802.503	948.755	966.557	994.378
tr|A0A1L8FAV0|A0A1L8FAV0_XENLA	hectd1.L	HECT-type E3 ubiquitin transferase OS=Xenopus laevis OX=8355 GN=hectd1.L PE=1 SV=1	663	4	C	UR	656.241	615.564	655.524	572.745	686.174	679.829
tr|A0A1L8HGQ6|A0A1L8HGQ6_XENLA	XELAEV_18012944mg	Uncharacterized protein OS=Xenopus laevis OX=8355 GN=XELAEV_18012944mg PE=1 SV=1	664	3	C	UR	662.452	829.162	493.008	402.523	297.213	318.784
tr|A0A1L8G422|A0A1L8G422_XENLA	tnik.S	Uncharacterized protein OS=Xenopus laevis OX=8355 GN=tnik.S PE=1 SV=1	664	1	C	UR	107.096	77.1117	58.2284	41.0222	54.8094	53.0097
tr|Q642R6|Q642R6_XENLA	nup205.S	MGC83295 protein OS=Xenopus laevis OX=8355 GN=nup205.S PE=2 SV=1	665	34	C	UR	7338.28	6442.92	4038.33	4118.84	3432.79	3403.07
tr|A0A1L8ELU2|A0A1L8ELU2_XENLA	ythdf1.S	YTH domain-containing protein OS=Xenopus laevis OX=8355 GN=ythdf1.S PE=4 SV=1	666	9	C	UR	1533.69	2105.99	1408.74	1102.6	1050.13	1183.31
tr|A0A1L8H7F2|A0A1L8H7F2_XENLA	XELAEV_18015091mg	YTH domain-containing protein OS=Xenopus laevis OX=8355 GN=XELAEV_18015091mg PE=1 SV=1	666	1	C	UR	109.127	136.903	102.723	92.2031	77.8713	86.8919
tr|B7ZQR5|B7ZQR5_XENLA	endoul.L	Poly(U)-specific endoribonuclease OS=Xenopus laevis OX=8355 GN=endoul.L PE=1 SV=1	667	6	C	UR	559.298	578.513	510.571	714.182	659.756	747.165
tr|A0A1L8GJT8|A0A1L8GJT8_XENLA	XELAEV_18022246mg	PDZ domain-containing protein OS=Xenopus laevis OX=8355 GN=XELAEV_18022246mg PE=1 SV=1	668	4	C	UR	264.087	254.431	263.592	233.346	269.868	286.569
tr|A0A1L8I1X1|A0A1L8I1X1_XENLA	XELAEV_18008152mg	Transcription factor BTF3 OS=Xenopus laevis OX=8355 GN=XELAEV_18008152mg PE=3 SV=1	669	5	C	UR	478.822	461.57	540.422	636.56	597.602	777.15
tr|Q7ZXD0|Q7ZXD0_XENLA	prc1.2.S	MGC53266 protein OS=Xenopus laevis OX=8355 GN=prc1.2.S PE=2 SV=1	670	4	C	UR	535.811	510.81	598.556	511.869	388.19	420.075
tr|A0A1L8HVH6|A0A1L8HVH6_XENLA	prc1.2.L	Uncharacterized protein OS=Xenopus laevis OX=8355 GN=prc1.2.L PE=1 SV=1	670	7	C	UR	2498.15	1964.03	1662.94	1413.05	1398.6	1280.56
tr|Q5FWL1|Q5FWL1_XENLA	nampt.L	Nicotinamide phosphoribosyltransferase OS=Xenopus laevis OX=8355 GN=nampt.L PE=2 SV=1	671	1	C	UR	47.8019	36.435	37.0611	45.0429	35.156	34.9751
tr|A0A1L8G4F1|A0A1L8G4F1_XENLA	wdr33.S	WD_REPEATS_REGION domain-containing protein OS=Xenopus laevis OX=8355 GN=wdr33.S PE=1 SV=1	672	4	C	UR	725.398	484.889	370.09	319.85	233.867	226.156
tr|A0A1L8GAN7|A0A1L8GAN7_XENLA	wdr33.L	WD_REPEATS_REGION domain-containing protein OS=Xenopus laevis OX=8355 GN=wdr33.L PE=4 SV=1	672	1	C	UR	95.4886	75.6188	68.9184	47.3883	43.9548	47.0458
tr|A0A1L8FJZ1|A0A1L8FJZ1_XENLA	sec24c.L	Uncharacterized protein OS=Xenopus laevis OX=8355 GN=sec24c.L PE=3 SV=1	673	12	C	UR	709.885	651.432	1172.39	1070.52	1322.79	1050.52
tr|A0A1L8FF45|A0A1L8FF45_XENLA	XELAEV_18037141mg	Uncharacterized protein OS=Xenopus laevis OX=8355 GN=XELAEV_18037141mg PE=1 SV=1	673	23	C	UR	2085.71	1828.19	3671.16	3421.84	4104.39	3250.79
tr|A0A1L8GBH3|A0A1L8GBH3_XENLA	pak2.L	Non-specific serine/threonine protein kinase OS=Xenopus laevis OX=8355 GN=pak2.L PE=4 SV=1	674	6	C	UR	639.244	633.221	689.637	717.154	705.877	941.102
tr|Q7ZWK1|Q7ZWK1_XENLA	pdcd4.L	Programmed cell death protein 4 OS=Xenopus laevis OX=8355 GN=pdcd4.L PE=2 SV=1	675	4	C	UR	255.319	241.951	287.437	320.93	342.504	386.178
tr|A0A1L8GZ18|A0A1L8GZ18_XENLA	XELAEV_18017690mg	Hist_deacetyl domain-containing protein OS=Xenopus laevis OX=8355 GN=XELAEV_18017690mg PE=1 SV=1	676	2	C	UR	145.769	144.275	161.658	164.303	180.009	208.243
sp|Q52KW8|RCC2_XENLA	rcc2	Protein RCC2 homolog OS=Xenopus laevis OX=8355 GN=rcc2 PE=2 SV=1	677	7	C	UR	2135.5	2216.28	999.825	1114.15	744.18	876.415
tr|Q7ZY37|Q7ZY37_XENLA	aco1.L	Citrate hydro-lyase OS=Xenopus laevis OX=8355 GN=aco1.L PE=1 SV=1	678	3	C	UR	451.937	408.883	452.274	420.766	467.671	424.753
sp|Q6GNR9|OST48_XENLA	ddost	Dolichyl-diphosphooligosaccharide--protein glycosyltransferase 48 kDa subunit OS=Xenopus laevis OX=8355 GN=ddost PE=2 SV=1	679	6	C	UR	992.71	1074.72	984.52	1365.12	1301.72	1681.02
sp|P23403|RS20_XENLA	rps20	40S ribosomal protein S20 OS=Xenopus laevis OX=8355 GN=rps20 PE=1 SV=1	680	6	C	UR	765.009	959.306	1432.93	1910.26	1679.25	1980.54
tr|A0AUT2|A0AUT2_XENLA	usp5.S	Ubiquitin carboxyl-terminal hydrolase OS=Xenopus laevis OX=8355 GN=usp5.S PE=1 SV=1	681	7	C	UR	991.288	890.289	918.56	1023.22	1071.97	1200.31
tr|Q6AX35|Q6AX35_XENLA	usp5.L	Ubiquitin carboxyl-terminal hydrolase OS=Xenopus laevis OX=8355 GN=usp5.L PE=2 SV=1	681	15	C	UR	1711.9	1717.57	1888.53	1977.9	2294.03	2199
tr|Q5XGR5|Q5XGR5_XENLA	LOC495269	LOC495269 protein (Fragment) OS=Xenopus laevis OX=8355 GN=LOC495269 PE=2 SV=1	682	8	C	UR	707.05	855.744	873.275	949.645	984.361	1056.94
tr|A0A1L8FEF8|A0A1L8FEF8_XENLA	XELAEV_18036863mg	Uncharacterized protein OS=Xenopus laevis OX=8355 GN=XELAEV_18036863mg PE=4 SV=1	682	2	C	UR	196.845	194.698	180.58	206.005	193.381	214.862
tr|A0A1L8G0G1|A0A1L8G0G1_XENLA	XELAEV_18032536mg	Uncharacterized protein OS=Xenopus laevis OX=8355 GN=XELAEV_18032536mg PE=1 SV=1	683	25	C	UR	5560.19	5178.36	3241.33	2769.39	2557.51	2825.82
tr|A0A1L8FU77|A0A1L8FU77_XENLA	plec.S	Uncharacterized protein OS=Xenopus laevis OX=8355 GN=plec.S PE=1 SV=1	683	8	C	UR	1319.16	1402.31	979.051	855.285	761.545	817.585
tr|A0A310UC86|A0A310UC86_XENLA	XELAEV_18004054mg	Uncharacterized protein OS=Xenopus laevis OX=8355 GN=XELAEV_18004054mg PE=4 SV=1	683	1	C	UR	40.6555	33.3215	33.1207	32.178	37.2741	39.3231
tr|A0A1L8HFS8|A0A1L8HFS8_XENLA	XELAEV_18012621mg	Uncharacterized protein OS=Xenopus laevis OX=8355 GN=XELAEV_18012621mg PE=1 SV=1	683	1	C	UR	32.598	36.9221	42.5075	39.5402	32.7433	35.5516
tr|A0A1L8GE79|A0A1L8GE79_XENLA	XELAEV_18024664mg	Uncharacterized protein OS=Xenopus laevis OX=8355 GN=XELAEV_18024664mg PE=1 SV=1	684	3	C	UR	478.309	483.989	352.666	412.711	340.819	433.335
tr|Q7ZTM1|Q7ZTM1_XENLA	ppil2.S	RING-type E3 ubiquitin transferase OS=Xenopus laevis OX=8355 GN=ppil2.S PE=1 SV=1	685	1	C	UR	191.641	401.715	239.951	166.651	61.6377	68.4752
tr|Q5MPF8|Q5MPF8_XENLA	atm.L	Non-specific serine/threonine protein kinase OS=Xenopus laevis OX=8355 GN=atm.L PE=2 SV=1	686	18	C	UR	3229.54	2781.9	2057.88	1975.41	1822.28	1624.2
tr|Q63ZJ5|Q63ZJ5_XENLA		TAN domain-containing protein (Fragment) OS=Xenopus laevis OX=8355 PE=2 SV=1	686	1	C	UR	284.692	225.045	191.879	201.296	201.363	195.906
tr|A0A1L8HA48|A0A1L8HA48_XENLA	XELAEV_18015983mg	DMAP_binding domain-containing protein OS=Xenopus laevis OX=8355 GN=XELAEV_18015983mg PE=1 SV=1	687	2	C	UR	190.863	231.095	281.274	230.647	220.816	211.074
tr|A0A1L8EWJ4|A0A1L8EWJ4_XENLA	XELAEV_18044807mg	DMAP_binding domain-containing protein OS=Xenopus laevis OX=8355 GN=XELAEV_18044807mg PE=3 SV=1	687	1	C	UR	518.184	631.726	342.75	239.218	218.385	202.285
tr|Q7ZTL0|Q7ZTL0_XENLA	hadhb.S	Thiolase-prov protein OS=Xenopus laevis OX=8355 GN=hadhb.S PE=2 SV=1	688	4	C	UR	299.094	290.48	357.412	293.101	351.335	366.241
tr|A0A1L8HW09|A0A1L8HW09_XENLA	XELAEV_18005996mg	WD_REPEATS_REGION domain-containing protein OS=Xenopus laevis OX=8355 GN=XELAEV_18005996mg PE=3 SV=1	689	5	C	UR	464.133	427.743	458.575	443.934	1215.05	897.599
tr|Q6DDM7|Q6DDM7_XENLA	acadl.L	Long-chain specific acyl-CoA dehydrogenase, mitochondrial OS=Xenopus laevis OX=8355 GN=acadl.L PE=1 SV=1	690	4	C	UR	647.908	682.049	496.407	795.258	586.647	794.935
sp|Q6GPA8|SCM5A_XENLA	scamp5-a	Secretory carrier-associated membrane protein 5A OS=Xenopus laevis OX=8355 GN=scamp5-a PE=2 SV=1	691	1	C	UR	89.2948	55.3069	53.9611	60.1066	80.7178	92.5199
tr|Q6GQE6|Q6GQE6_XENLA	snrpb2.S	MGC80122 protein OS=Xenopus laevis OX=8355 GN=snrpb2.S PE=2 SV=1	692	1	C	UR	33.7361	34.8472	54.3182	57.9074	59.7117	79.6196
tr|A0A1L8ENK2|A0A1L8ENK2_XENLA	bin1.S	Uncharacterized protein OS=Xenopus laevis OX=8355 GN=bin1.S PE=1 SV=1	693	2	C	UR	225.284	190.582	205.402	234.796	245.398	268.154
tr|A0A1L8HF67|A0A1L8HF67_XENLA	ddx20.L	RNA helicase OS=Xenopus laevis OX=8355 GN=ddx20.L PE=1 SV=1	694	6	C	UR	327.151	504.022	643.469	539.32	633.623	699.854
tr|A0A1L8GQY4|A0A1L8GQY4_XENLA	polr3b.S	DNA-directed RNA polymerase subunit beta OS=Xenopus laevis OX=8355 GN=polr3b.S PE=1 SV=1	695	4	C	UR	295.929	281.146	266.134	298.852	293.66	298.534
sp|Q6NU40|CTF18_XENLA	chtf18	Chromosome transmission fidelity protein 18 homolog OS=Xenopus laevis OX=8355 GN=chtf18 PE=2 SV=1	696	1	C	UR	30.4238	52.5269	52.0705	49.7838	35.3108	45.0397
tr|A0A1L8FYP5|A0A1L8FYP5_XENLA	usp14.L	Ubiquitin carboxyl-terminal hydrolase OS=Xenopus laevis OX=8355 GN=usp14.L PE=1 SV=1	697	11	C	UR	1351.75	1449.99	1557.48	1714.86	1823.84	2021.65
tr|Q641D7|Q641D7_XENLA	usp14.S	Ubiquitin carboxyl-terminal hydrolase OS=Xenopus laevis OX=8355 GN=usp14.S PE=1 SV=1	697	2	C	UR	511.004	422.238	483.363	561.311	623.985	592.487
tr|A0A1L8H8F9|A0A1L8H8F9_XENLA	tfg.S	PB1 domain-containing protein OS=Xenopus laevis OX=8355 GN=tfg.S PE=4 SV=1	698	6	C	UR	1532.77	1660.04	1593.96	1527.23	1950.04	2054.4
tr|A0A1L8HB11|A0A1L8HB11_XENLA	dcun1d5.S	DCN1-like protein OS=Xenopus laevis OX=8355 GN=dcun1d5.S PE=4 SV=1	700	3	C	UR	495.39	432.05	352.59	390.586	388.63	439.052
tr|A0A1L8FI32|A0A1L8FI32_XENLA	smndc1.L	Tudor domain-containing protein OS=Xenopus laevis OX=8355 GN=smndc1.L PE=1 SV=1	701	4	C	UR	333.401	372.871	398.707	350.342	360.285	363.072
sp|Q6INH5|SRRTB_XENLA	srrt-b	Serrate RNA effector molecule homolog B OS=Xenopus laevis OX=8355 GN=srrt-b PE=2 SV=1	702	3	C	UR	230.8	256.795	228.415	280.852	261.493	301.386
sp|Q7T0S2|NUDC1_XENLA	nudcd1	NudC domain-containing protein 1 OS=Xenopus laevis OX=8355 GN=nudcd1 PE=2 SV=1	703	8	C	UR	1113.51	1027	909.194	919.585	1093.99	1126.9
tr|Q6AZJ0|Q6AZJ0_XENLA	glud1.S	Glutamate dehydrogenase OS=Xenopus laevis OX=8355 GN=glud1.S PE=2 SV=1	704	5	C	UR	1060.59	990.272	1346.64	1326.21	1609.86	1202.14
tr|A3KND1|A3KND1_XENLA	rae1.L	Rae1 protein homolog OS=Xenopus laevis OX=8355 GN=rae1.L PE=1 SV=1	705	8	C	UR	410.877	432.942	1178.89	988.875	1063.82	792.251
tr|Q7ZZY7|Q7ZZY7_XENLA	rae1.S	Rae1 protein homolog OS=Xenopus laevis OX=8355 GN=rae1.S PE=1 SV=1	705	5	C	UR	199.3	205.194	608.6	497.091	722.15	504.909
tr|A0A1L8GED4|A0A1L8GED4_XENLA	XELAEV_18024624mg	Proteasome subunit alpha type OS=Xenopus laevis OX=8355 GN=XELAEV_18024624mg PE=1 SV=1	707	9	C	UR	1761.62	1706.46	1886.51	2193.68	2341.78	2454.85
tr|Q58E21|Q58E21_XENLA	psma1.L	Proteasome subunit alpha type OS=Xenopus laevis OX=8355 GN=psma1.L PE=2 SV=1	707	2	C	UR	404.408	420.85	459.467	541.33	595.829	652
tr|A0A1L8I1C4|A0A1L8I1C4_XENLA	hint1.L	HIT domain-containing protein OS=Xenopus laevis OX=8355 GN=hint1.L PE=1 SV=1	708	8	C	UR	483.686	606.951	765.362	844.918	858.557	991.127
tr|A0A1L8HQY5|A0A1L8HQY5_XENLA	XELAEV_18010724mg	HIT domain-containing protein OS=Xenopus laevis OX=8355 GN=XELAEV_18010724mg PE=1 SV=1	708	4	C	UR	739.948	580.225	717.403	1110.05	967.664	881.972
tr|A0A1L8G0I0|A0A1L8G0I0_XENLA	XELAEV_18032508mg	Uncharacterized protein OS=Xenopus laevis OX=8355 GN=XELAEV_18032508mg PE=3 SV=1	709	9	C	UR	1385.19	1427.83	1445.47	1411.81	1651.49	1754.56
tr|Q6DCM5|Q6DCM5_XENLA	ppp4r1.S	Ppp4r1-prov protein OS=Xenopus laevis OX=8355 GN=ppp4r1.S PE=2 SV=1	710	4	C	UR	517.07	598.767	569.108	543.461	533.031	575.586
tr|Q5M957|Q5M957_XENLA	dera.S	2-deoxy-D-ribose 5-phosphate aldolase OS=Xenopus laevis OX=8355 GN=dera.S PE=2 SV=1	711	3	C	UR	391.914	447.521	437.977	476.157	394.422	416.509
tr|Q58EW6|Q58EW6_XENLA	ikbkg.L	MGC97885 protein OS=Xenopus laevis OX=8355 GN=ikbkg.L PE=2 SV=1	712	2	C	UR	220.774	151.523	197.967	207.002	159.963	140.777
tr|A0A1L8FMQ6|A0A1L8FMQ6_XENLA	trim28.L	Uncharacterized protein OS=Xenopus laevis OX=8355 GN=trim28.L PE=1 SV=1	713	4	C	UR	379.021	321.862	259.255	250.986	230.242	245.222
tr|A0A1L8FGJ0|A0A1L8FGJ0_XENLA	trim28.S	Uncharacterized protein OS=Xenopus laevis OX=8355 GN=trim28.S PE=1 SV=1	713	8	C	UR	1421.37	1470.43	1282.68	1113.82	1215.04	1208.44
tr|Q7ZX00|Q7ZX00_XENLA	kpna2.S	Importin subunit alpha OS=Xenopus laevis OX=8355 GN=kpna2.S PE=2 SV=1	714	8	C	UR	751.898	1162.23	1145.31	956.766	1003.44	1187.09
tr|Q7ZYI0|Q7ZYI0_XENLA	kpna2.L	Importin subunit alpha OS=Xenopus laevis OX=8355 GN=kpna2.L PE=1 SV=1	714	3	C	UR	556.239	1138.48	1296.18	1045.08	1084.13	1099.81
sp|P20233|TRFEA_XENLA	tf-a	Serotransferrin-A OS=Xenopus laevis OX=8355 GN=tf-a PE=2 SV=3	715	11	C	UR	1398.87	1772.98	1871.9	1864.45	3253.36	2926.3
tr|A0A1L8GB26|A0A1L8GB26_XENLA	XELAEV_18027940mg	Signal recognition particle receptor subunit beta OS=Xenopus laevis OX=8355 GN=XELAEV_18027940mg PE=3 SV=1	715	1	C	UR	37.0867	34.6298	25.6983	37.0732	34.6207	44.638
sp|Q04615|VINC_XENLA	vcl	Vinculin (Fragment) OS=Xenopus laevis OX=8355 GN=vcl PE=2 SV=1	716	4	C	UR	981.809	1238	1210.44	1393.06	1372.31	1310.51
tr|A0A1L8FVF0|A0A1L8FVF0_XENLA	XELAEV_18030736mg	HP domain-containing protein OS=Xenopus laevis OX=8355 GN=XELAEV_18030736mg PE=1 SV=1	717	1	C	UR	70.5433	72.856	84.0191	87.4253	103.626	119.397
tr|A0A1L8GIH9|A0A1L8GIH9_XENLA	XELAEV_18021771mg	Uncharacterized protein (Fragment) OS=Xenopus laevis OX=8355 GN=XELAEV_18021771mg PE=1 SV=1	718	21	C	UR	2268.76	3557.85	2786.93	2176.24	1663.5	1803.54
tr|A0A1L8GEC3|A0A1L8GEC3_XENLA	XELAEV_18024574mg	Uncharacterized protein OS=Xenopus laevis OX=8355 GN=XELAEV_18024574mg PE=3 SV=1	718	2	C	UR	170.58	280.025	225.516	193.379	150.017	176.664
sp|Q801Q8|AP2M1_XENLA	ap2m1	AP-2 complex subunit mu OS=Xenopus laevis OX=8355 GN=ap2m1 PE=2 SV=1	719	12	C	UR	2386.35	2227.65	2198.33	2493.8	1368.5	1293.26
sp|Q08B12|CTU2A_XENLA	ctu2-a	Cytoplasmic tRNA 2-thiolation protein 2-A OS=Xenopus laevis OX=8355 GN=ctu2-a PE=2 SV=1	720	8	C	UR	729.107	718.872	807.802	761.876	625.847	660.955
sp|Q6GR45|IF6_XENLA	eif6	Eukaryotic translation initiation factor 6 OS=Xenopus laevis OX=8355 GN=eif6 PE=2 SV=1	721	2	C	UR	157.538	157.6	168.911	174.986	197.39	233.07
tr|A0A1L8GR64|A0A1L8GR64_XENLA	lonrf1.S	Uncharacterized protein OS=Xenopus laevis OX=8355 GN=lonrf1.S PE=4 SV=1	722	7	C	UR	1120.99	909.396	719.799	816.425	767.498	695.826
tr|A0A1L8HXY0|A0A1L8HXY0_XENLA	XELAEV_18006748mg	UV excision repair protein RAD23 OS=Xenopus laevis OX=8355 GN=XELAEV_18006748mg PE=1 SV=1	723	10	C	UR	1926.08	1941.08	2380.51	1950.37	2073.45	1863.28
tr|A0A1L8HNW9|A0A1L8HNW9_XENLA	XELAEV_18010029mg	UV excision repair protein RAD23 OS=Xenopus laevis OX=8355 GN=XELAEV_18010029mg PE=1 SV=1	723	7	C	UR	795.357	716.101	839.438	763.781	821.137	789.538
tr|A0A1L8FKT6|A0A1L8FKT6_XENLA	XELAEV_18035167mg	Amino_oxidase domain-containing protein OS=Xenopus laevis OX=8355 GN=XELAEV_18035167mg PE=1 SV=1	724	5	C	UR	437.617	447.217	836.188	758.866	445.397	453.369
tr|A0A1L8HGZ5|A0A1L8HGZ5_XENLA	XELAEV_18013027mg	Gamma-tubulin complex component OS=Xenopus laevis OX=8355 GN=XELAEV_18013027mg PE=1 SV=1	726	27	C	UR	5815.33	6470.18	4434.61	4449.55	1755.1	1931.25
tr|A2RV69|A2RV69_XENLA	nup107.S	Nuclear pore complex protein OS=Xenopus laevis OX=8355 GN=nup107.S PE=1 SV=1	727	1	C	UR	58.209	64.8014	48.695	44.3282	43.2262	50.7256
sp|Q7ZY73|NDRG2_XENLA	ndrg2	Protein NDRG2 OS=Xenopus laevis OX=8355 GN=ndrg2 PE=2 SV=1	728	6	C	UR	683.798	859.904	970.287	1036.56	1163.55	1434.65
sp|O13024|INCEA_XENLA	incenp-a	Inner centromere protein A OS=Xenopus laevis OX=8355 GN=incenp-a PE=1 SV=1	729	5	C	UR	404.404	567.198	356.198	362.512	246.675	252.019
tr|A0A1L8HGE8|A0A1L8HGE8_XENLA	rabep1.L	Uncharacterized protein OS=Xenopus laevis OX=8355 GN=rabep1.L PE=1 SV=1	730	3	C	UR	269.539	251.57	186.16	198.544	239.729	237.07
tr|A0A1L8HYN0|A0A1L8HYN0_XENLA	ipo4.L	Importin N-terminal domain-containing protein OS=Xenopus laevis OX=8355 GN=ipo4.L PE=1 SV=1	731	7	C	UR	897.794	892.694	869.78	858.476	913.176	920.029
tr|Q4KLQ6|Q4KLQ6_XENLA	nup88.L	Nup88A protein OS=Xenopus laevis OX=8355 GN=nup88.L PE=2 SV=1	733	1	C	UR	137.237	182.258	142.527	139.927	111.966	111.338
tr|Q0IH54|Q0IH54_XENLA	poglut3.L	LOC443629 protein OS=Xenopus laevis OX=8355 GN=poglut3.L PE=2 SV=1	734	4	C	UR	542.687	557.319	445.178	519.858	626.273	620.938
tr|A0A1L8EUL0|A0A1L8EUL0_XENLA	XELAEV_18044094mg	UBC core domain-containing protein OS=Xenopus laevis OX=8355 GN=XELAEV_18044094mg PE=1 SV=1	735	19	C	UR	2014.07	2102.57	2330.22	2076.12	2316.15	2502.9
tr|A0A1L8EMX4|A0A1L8EMX4_XENLA	ube2o.S	UBC core domain-containing protein OS=Xenopus laevis OX=8355 GN=ube2o.S PE=4 SV=1	735	1	C	UR	68.3261	83.7741	78.8406	123.213	98.1587	116.233
tr|A0A1L8F918|A0A1L8F918_XENLA	ech1.L	Uncharacterized protein OS=Xenopus laevis OX=8355 GN=ech1.L PE=1 SV=1	736	11	C	UR	2959.74	2205.48	4313.35	4554.59	1691.28	1339.23
sp|Q32N93|INCEB_XENLA	incenp-b	Inner centromere protein B OS=Xenopus laevis OX=8355 GN=incenp-b PE=2 SV=1	737	1	C	UR	80.5113	123.803	65.5124	57.7572	38.915	26.557
tr|A0A1L8GCR7|A0A1L8GCR7_XENLA	XELAEV_18024190mg	Dipeptidyl peptidase 3 OS=Xenopus laevis OX=8355 GN=XELAEV_18024190mg PE=1 SV=1	738	15	C	UR	2077.27	2159.32	2084.84	2356.29	2403.87	2559.4
tr|A0A1L8GJX9|A0A1L8GJX9_XENLA	dpp3.L	Dipeptidyl peptidase 3 OS=Xenopus laevis OX=8355 GN=dpp3.L PE=3 SV=1	738	6	C	UR	799.726	985.157	952.92	1124.63	1219.13	1342.7
tr|Q6DJD1|Q6DJD1_XENLA	copa.L	Coatomer subunit alpha OS=Xenopus laevis OX=8355 GN=copa.L PE=2 SV=1	739	32	C	UR	4375.22	4328.43	4517.74	3847.4	3649.84	3744.3
tr|A0A1L8F4N1|A0A1L8F4N1_XENLA	copa.S	Coatomer subunit alpha OS=Xenopus laevis OX=8355 GN=copa.S PE=1 SV=1	739	5	C	UR	846.879	932.8	1070.49	806.756	831.409	793.676
tr|A0A1L8EYK3|A0A1L8EYK3_XENLA	XELAEV_18045507mg	Pribosyltran_N domain-containing protein OS=Xenopus laevis OX=8355 GN=XELAEV_18045507mg PE=1 SV=1	740	5	C	UR	1729.23	1521.41	1327.2	1344.5	1059.85	1235.71
tr|A0A1L8HB35|A0A1L8HB35_XENLA	XELAEV_18016358mg	BTB domain-containing protein OS=Xenopus laevis OX=8355 GN=XELAEV_18016358mg PE=4 SV=1	741	5	C	UR	372.001	334.977	381.784	394.692	304.768	317.763
tr|Q52L16|Q52L16_XENLA	cryz.L	LOC445846 protein OS=Xenopus laevis OX=8355 GN=cryz.L PE=1 SV=1	742	1	C	UR	33.1762	36.2279	43.2745	44.518	57.8674	67.2051
tr|A0A1L8I094|A0A1L8I094_XENLA	eif4enif1.L	Uncharacterized protein OS=Xenopus laevis OX=8355 GN=eif4enif1.L PE=1 SV=1	743	4	C	UR	977.431	1901.15	1390.17	1176.44	539.457	783.148
tr|A0A1L8HQ92|A0A1L8HQ92_XENLA	eif4enif1.S	Uncharacterized protein OS=Xenopus laevis OX=8355 GN=eif4enif1.S PE=4 SV=1	743	5	C	UR	496.964	703.635	625.662	577.459	423.088	491.68
tr|A0A1L8GX00|A0A1L8GX00_XENLA	hars2.L	Histidine--tRNA ligase OS=Xenopus laevis OX=8355 GN=hars2.L PE=1 SV=1	745	7	C	UR	787.607	757.312	856.059	861.134	988.939	1017.02
tr|A0A1L8G6D3|A0A1L8G6D3_XENLA	lrpprc.L	PPR_long domain-containing protein OS=Xenopus laevis OX=8355 GN=lrpprc.L PE=1 SV=1	746	6	C	UR	670.501	705.571	1250.06	1345.97	537.361	567.27
sp|Q5FWM1|ATAT_XENLA	atat1	Alpha-tubulin N-acetyltransferase 1 OS=Xenopus laevis OX=8355 GN=atat1 PE=2 SV=1	747	1	C	UR	98.0299	115.586	84.5791	80.2181	24.1855	36.5882
tr|A0A1L8H5R4|A0A1L8H5R4_XENLA	XELAEV_18014493mg	Uncharacterized protein OS=Xenopus laevis OX=8355 GN=XELAEV_18014493mg PE=1 SV=1	748	21	C	UR	2880.12	4538.67	6975.13	4726.72	2902.67	2827.28
tr|A0A1L8F6K3|A0A1L8F6K3_XENLA	ercc6l.L	Uncharacterized protein OS=Xenopus laevis OX=8355 GN=ercc6l.L PE=1 SV=1	748	5	C	UR	449.458	509.939	583.146	497.643	516.88	568.521
sp|Q6DJM6|INT12_XENLA	ints12	Integrator complex subunit 12 OS=Xenopus laevis OX=8355 GN=ints12 PE=2 SV=1	749	6	C	UR	691.594	1068.44	1219.66	851.107	398.534	411.002
tr|Q7T0Y5|Q7T0Y5_XENLA	acads.L	Acads protein OS=Xenopus laevis OX=8355 GN=acads.L PE=1 SV=1	750	2	C	UR	203.786	212.452	230.483	250.242	270.956	244.348
tr|Q640G3|Q640G3_XENLA	LOC494679	LOC494679 protein (Fragment) OS=Xenopus laevis OX=8355 GN=LOC494679 PE=2 SV=1	751	4	C	UR	348.876	302.821	455.167	488.65	428.318	427.962
tr|A0A1L8H1A8|A0A1L8H1A8_XENLA	XELAEV_18018495mg	Fumarylacetoacetase OS=Xenopus laevis OX=8355 GN=XELAEV_18018495mg PE=1 SV=1	752	3	C	UR	275.438	250.238	252.453	268.248	310.206	327.492
tr|A0A1L8HTL0|A0A1L8HTL0_XENLA	ugdh.L	UDP-glucose 6-dehydrogenase OS=Xenopus laevis OX=8355 GN=ugdh.L PE=3 SV=1	753	13	C	UR	2122.87	2545.39	2531.01	2437.19	2546.54	2741.44
tr|Q66KF3|Q66KF3_XENLA	sec31b.L	MGC86445 protein OS=Xenopus laevis OX=8355 GN=sec31b.L PE=2 SV=1	754	6	C	UR	629.871	566.343	873.372	706.951	2974.34	2124.72
tr|A0A1L8FF52|A0A1L8FF52_XENLA	XELAEV_18037117mg	WD_REPEATS_REGION domain-containing protein OS=Xenopus laevis OX=8355 GN=XELAEV_18037117mg PE=1 SV=1	754	34	C	UR	3440.99	3154.75	4438.45	3584.02	16644.7	11264
tr|A0A1L8EXS0|A0A1L8EXS0_XENLA	brat1.L	Uncharacterized protein OS=Xenopus laevis OX=8355 GN=brat1.L PE=1 SV=1	755	2	C	UR	167.715	216.347	256.275	266.025	160.861	163.976
tr|Q6NTQ7|Q6NTQ7_XENLA	xpnpep1.L	MGC83093 protein OS=Xenopus laevis OX=8355 GN=xpnpep1.L PE=1 SV=1	756	5	C	UR	424.249	380.821	401.441	389.811	696.459	576.325
tr|Q6INU4|Q6INU4_XENLA	aimp2.S	Aminoacyl tRNA synthase complex-interacting multifunctional protein 2 OS=Xenopus laevis OX=8355 GN=aimp2.S PE=1 SV=1	758	2	C	UR	81.0127	60.8481	63.5321	75.1758	83.4892	85.6749
tr|A0A1L8HYU0|A0A1L8HYU0_XENLA	psmb5.L	Proteasome subunit beta OS=Xenopus laevis OX=8355 GN=psmb5.L PE=1 SV=1	759	3	C	UR	453.364	372.921	467.068	432.249	485.091	446.059
tr|A0A1L8HPN0|A0A1L8HPN0_XENLA	psmb5.S	Proteasome subunit beta OS=Xenopus laevis OX=8355 GN=psmb5.S PE=3 SV=1	759	9	C	UR	1357.31	1223.71	1412.78	1341.58	1627.49	1519.21
sp|Q01588|RFA1_XENLA	rpa1	Replication protein A 70 kDa DNA-binding subunit OS=Xenopus laevis OX=8355 GN=rpa1 PE=1 SV=1	760	19	C	UR	3876.02	3363.2	4478.28	3950.67	3998.28	3328.61
tr|A0A1L8H4R2|A0A1L8H4R2_XENLA	XELAEV_18014137mg	Replication protein A subunit OS=Xenopus laevis OX=8355 GN=XELAEV_18014137mg PE=3 SV=1	760	3	C	UR	217.299	168.548	189.506	173.017	169.751	173.928
tr|Q3KPN6|Q3KPN6_XENLA	psma4.L	Proteasome subunit alpha type OS=Xenopus laevis OX=8355 GN=psma4.L PE=2 SV=1	761	11	C	UR	2276.44	2443.92	2702.75	3061.49	3574.43	3432.4
tr|Q7ZTM2|Q7ZTM2_XENLA	psma4.S	Proteasome subunit alpha type OS=Xenopus laevis OX=8355 GN=psma4.S PE=2 SV=1	761	1	C	UR	109.562	130.741	135.431	170.955	188.089	178.883
tr|Q640H5|Q640H5_XENLA	idh1.L	Isocitrate dehydrogenase [NADP] OS=Xenopus laevis OX=8355 GN=idh1.L PE=1 SV=1	762	14	C	UR	2180.5	2663.15	3407.98	3316.75	2950.53	2989.38
tr|A0A1L8EPX4|A0A1L8EPX4_XENLA	idh1.S	Isocitrate dehydrogenase [NADP] OS=Xenopus laevis OX=8355 GN=idh1.S PE=3 SV=1	762	5	C	UR	947.848	1066	1366.59	1327.92	1040.33	1118.96
tr|A0A1L8GSL7|A0A1L8GSL7_XENLA	XELAEV_18020537mg	Isocitrate dehydrogenase [NADP] OS=Xenopus laevis OX=8355 GN=XELAEV_18020537mg PE=3 SV=1	762	1	C	UR	173.205	199.847	211.733	222.825	201.855	232.848
sp|Q1L721|RN138_XENLA	rnf138	E3 ubiquitin-protein ligase RNF138 OS=Xenopus laevis OX=8355 GN=rnf138 PE=1 SV=1	763	2	C	UR	372.842	355	203.504	233.653	129.199	125.855
tr|Q6DD01|Q6DD01_XENLA	pitpnb.2.L	Pitpnb-prov protein OS=Xenopus laevis OX=8355 GN=pitpnb.2.L PE=2 SV=1	764	2	C	UR	298.064	439.594	488.681	562.476	689.622	710.706
tr|Q68EX4|Q68EX4_XENLA	psmb7.S	Proteasome subunit beta OS=Xenopus laevis OX=8355 GN=psmb7.S PE=2 SV=1	765	6	C	UR	1333.91	1064.56	1164.86	1210.86	1552.22	1444.35
tr|A0A1L8F6D8|A0A1L8F6D8_XENLA	psmb7.L	Proteasome subunit beta OS=Xenopus laevis OX=8355 GN=psmb7.L PE=3 SV=1	765	3	C	UR	386.383	335.34	445.905	543.677	566.807	530.687
tr|A0A1L8FXT6|A0A1L8FXT6_XENLA	eci2.L	ACB domain-containing protein OS=Xenopus laevis OX=8355 GN=eci2.L PE=1 SV=1	766	3	C	UR	253.554	233.095	373.502	443.17	263.72	241.658
tr|Q3B8A0|Q3B8A0_XENLA	MGC78958	MGC78958 protein OS=Xenopus laevis OX=8355 GN=MGC78958 PE=2 SV=1	767	4	C	UR	441.574	449	402.59	512.032	485.555	489.67
sp|Q5XK85|KATIP_XENLA		Protein KATNIP homolog OS=Xenopus laevis OX=8355 PE=2 SV=1	768	1	C	UR	105.72	211.571	79.7387	52.5754	15.3525	17.7845
tr|Q76FS4|Q76FS4_XENLA	drg2.S	Developmentally regulated GTP-binding protein drg2 OS=Xenopus laevis OX=8355 GN=drg2.S PE=1 SV=1	769	7	C	UR	580.641	644.404	679.577	651.613	713.292	704.771
tr|A0A1L8FID4|A0A1L8FID4_XENLA	XELAEV_18034325mg	Uncharacterized protein OS=Xenopus laevis OX=8355 GN=XELAEV_18034325mg PE=3 SV=1	770	1	C	UR	130.135	126.078	119.274	120.803	149.83	140.077
tr|Q5U510|Q5U510_XENLA	rpa3.L	LOC495401 protein OS=Xenopus laevis OX=8355 GN=rpa3.L PE=1 SV=1	771	6	C	UR	686.565	669.097	707.36	874.607	820.375	927.363
tr|A0A1L8HVB0|A0A1L8HVB0_XENLA	XELAEV_18005855mg	CBM20 domain-containing protein OS=Xenopus laevis OX=8355 GN=XELAEV_18005855mg PE=1 SV=1	772	4	C	UR	602.612	541.37	547.193	735.468	742.584	885.888
tr|A0A1L8I0Y1|A0A1L8I0Y1_XENLA	XELAEV_18007710mg	Uncharacterized protein OS=Xenopus laevis OX=8355 GN=XELAEV_18007710mg PE=1 SV=1	773	1	C	UR	43.6176	52.2844	51.6407	56.0473	51.7993	58.8818
tr|Q6DFI5|Q6DFI5_XENLA	MGC82317	Lactoylglutathione lyase OS=Xenopus laevis OX=8355 GN=MGC82317 PE=2 SV=1	774	5	C	UR	547.525	630.94	698.388	929.685	819.471	1076.34
tr|A0A1L8FS17|A0A1L8FS17_XENLA	otulin.S	Uncharacterized protein OS=Xenopus laevis OX=8355 GN=otulin.S PE=3 SV=1	775	1	C	UR	41.0978	39.9198	35.855	59.8971	45.2937	53.2296
sp|Q66KT3|DOHH_XENLA	dohh	Deoxyhypusine hydroxylase OS=Xenopus laevis OX=8355 GN=dohh PE=2 SV=1	776	1	C	UR	83.6442	65.4502	66.9988	65.4287	77.3789	93.9299
tr|A0A1L8HTA9|A0A1L8HTA9_XENLA	XELAEV_18005064mg	Uncharacterized protein OS=Xenopus laevis OX=8355 GN=XELAEV_18005064mg PE=1 SV=1	777	6	C	UR	391.44	413.033	416.342	434.587	476.797	507.782
sp|Q32NQ7|DAAF3_XENLA	dnaaf3	Dynein assembly factor 3, axonemal OS=Xenopus laevis OX=8355 GN=dnaaf3 PE=2 SV=1	778	1	C	UR	227.969	255.01	215.446	222.857	185.433	169.309
sp|Q8AV13|ANM1A_XENLA	prmt1-a	Protein arginine N-methyltransferase 1-A OS=Xenopus laevis OX=8355 GN=prmt1-a PE=1 SV=1	780	14	C	UR	1442.22	1491.89	1538.74	1717.18	1741.5	1931.59
sp|Q6VRB0|ANM1B_XENLA	prmt1-b	Protein arginine N-methyltransferase 1-B OS=Xenopus laevis OX=8355 GN=prmt1-b PE=1 SV=1	780	4	C	UR	324.948	374.698	343.088	356.293	377.764	425.329
tr|A0A1L8GGZ6|A0A1L8GGZ6_XENLA	tab1.S	PPM-type phosphatase domain-containing protein OS=Xenopus laevis OX=8355 GN=tab1.S PE=1 SV=1	781	5	C	UR	1206.39	1052.19	541.674	510.248	530.044	512.19
sp|P24495|PSA2_XENLA	psma2	Proteasome subunit alpha type-2 OS=Xenopus laevis OX=8355 GN=psma2 PE=2 SV=2	782	8	C	UR	750.961	770.906	970	940.54	919.301	862.619
tr|A0A1L8GWV6|A0A1L8GWV6_XENLA	dctn4.L	Uncharacterized protein OS=Xenopus laevis OX=8355 GN=dctn4.L PE=1 SV=1	783	5	C	UR	619.8	518.677	447.896	525.548	473.921	523.961
sp|Q7ZYA5|PRKAA_XENLA	prkra-a	Interferon-inducible double-stranded RNA-dependent protein kinase activator A homolog A OS=Xenopus laevis OX=8355 GN=prkra-a PE=2 SV=1	784	10	C	UR	964.48	911.195	995.151	1041.57	1057.12	1211.29
tr|A0A1L8HQN4|A0A1L8HQN4_XENLA	XELAEV_18010623mg	Uncharacterized protein OS=Xenopus laevis OX=8355 GN=XELAEV_18010623mg PE=1 SV=1	785	12	C	UR	1408.09	1355.03	1311.86	1276.04	1404.07	1401.35
tr|A0A1L8I128|A0A1L8I128_XENLA	clip1.L	Uncharacterized protein OS=Xenopus laevis OX=8355 GN=clip1.L PE=4 SV=1	785	11	C	UR	1289.16	1258.27	1219.28	1188.45	1179.31	1221.96
tr|A0A1L8FFG3|A0A1L8FFG3_XENLA	XELAEV_18037238mg	Pre-mRNA-processing factor 19 OS=Xenopus laevis OX=8355 GN=XELAEV_18037238mg PE=3 SV=1	787	8	C	UR	1231.39	1277.55	1148.65	1163.66	1134.8	1130.89
tr|Q7ZXW4|Q7ZXW4_XENLA	prpf19.L	Pre-mRNA-processing factor 19 OS=Xenopus laevis OX=8355 GN=prpf19.L PE=1 SV=1	787	1	C	UR	90.5259	58.1632	67.5758	80.8691	69.2642	72.4108
tr|Q3KQ84|Q3KQ84_XENLA	reep5.L	Receptor expression-enhancing protein OS=Xenopus laevis OX=8355 GN=reep5.L PE=1 SV=1	788	2	C	UR	208.451	347.033	349.968	490.041	460.157	454.906
tr|B7ZR96|B7ZR96_XENLA	LOC397919	Nucleolin OS=Xenopus laevis OX=8355 GN=LOC397919 PE=2 SV=1	789	10	C	UR	2438.21	3191.31	4308.09	3492.43	4764.34	4522.17
sp|P20397|NUCL_XENLA	ncl	Nucleolin OS=Xenopus laevis OX=8355 GN=ncl PE=2 SV=3	789	17	C	UR	2866.42	3101	4030.87	3220.87	4623.46	4455.76
tr|Q3KQ41|Q3KQ41_XENLA	nucks1.L	JC7 protein OS=Xenopus laevis OX=8355 GN=nucks1.L PE=2 SV=1	790	1	C	UR	268.433	293.117	291.797	375.561	283.997	431.326
tr|A0A1L8GHJ0|A0A1L8GHJ0_XENLA	XELAEV_18025839mg	Uncharacterized protein OS=Xenopus laevis OX=8355 GN=XELAEV_18025839mg PE=1 SV=1	791	8	C	UR	1027.71	1080.19	993.994	1150.63	1287.24	1388.75
tr|A0A1L8ERG1|A0A1L8ERG1_XENLA	XELAEV_18047960mg	Formylglycinamide ribonucleotide amidotransferase OS=Xenopus laevis OX=8355 GN=XELAEV_18047960mg PE=1 SV=1	792	29	C	UR	3642.17	4011.4	4471.23	4226	5279.35	5477.98
tr|A0A1L8FS47|A0A1L8FS47_XENLA	nsun2.S	NOL1/NOP2/Sun domain family member 2 OS=Xenopus laevis OX=8355 GN=nsun2.S PE=1 SV=1	793	17	C	UR	1754.69	1922.08	2369.5	2344.35	2890.47	2914.58
tr|Q6PH88|Q6PH88_XENLA	abhd14b.L	MGC68600 protein OS=Xenopus laevis OX=8355 GN=abhd14b.L PE=1 SV=1	794	3	C	UR	476.68	422.653	425.337	460.208	422.559	542.256
tr|Q6DCH2|Q6DCH2_XENLA	ephx2.L	Ephx2-prov protein OS=Xenopus laevis OX=8355 GN=ephx2.L PE=2 SV=1	795	2	C	UR	88.4368	83.6434	108.063	134.666	98.3252	108.349
tr|Q7ZYT8|Q7ZYT8_XENLA	cstf2.L	Cstf-64 protein OS=Xenopus laevis OX=8355 GN=cstf2.L PE=1 SV=1	796	8	C	UR	2090.71	1828.13	4345.64	4173.19	1868.05	1994.25
tr|Q68F41|Q68F41_XENLA	ctsv.L	MGC81823 protein OS=Xenopus laevis OX=8355 GN=ctsv.L PE=2 SV=1	797	1	C	UR	120.198	71.4321	43.4605	47.312	65.2971	60.8099
tr|Q7ZX92|Q7ZX92_XENLA	psmd14.S	26S proteasome regulatory subunit RPN11 OS=Xenopus laevis OX=8355 GN=psmd14.S PE=1 SV=1	798	10	C	UR	1718.34	2016.63	2449.82	2833.05	2666.81	3178.39
tr|A0A1L8ES81|A0A1L8ES81_XENLA	grn.L	Uncharacterized protein OS=Xenopus laevis OX=8355 GN=grn.L PE=3 SV=1	799	1	C	UR	97.6857	167.979	198.652	179.324	215.26	233.683
HaloTag		protein ADN27525.1 [HaloTag control vector]	800	49	C	UR	9881.56	7535.22	5470.52	5631.53	6683	5442.32
tr|Q7ZWN2|Q7ZWN2_XENLA	pdia6.S	Protein disulfide-isomerase A6 OS=Xenopus laevis OX=8355 GN=pdia6.S PE=1 SV=1	801	8	C	UR	479.785	453.491	398.886	507.977	474.465	532.217
tr|Q6DEA4|Q6DEA4_XENLA	pdia6.L	Protein disulfide-isomerase A6 OS=Xenopus laevis OX=8355 GN=pdia6.L PE=2 SV=1	801	1	C	UR	51.6608	69.0158	52.4355	71.452	73.7016	87.2412
sp|Q7ZYS8|RL10A_XENLA	rpl10a	60S ribosomal protein L10a OS=Xenopus laevis OX=8355 GN=rpl10a PE=2 SV=1	802	8	C	UR	678.727	962.216	1259.46	1548.85	1373.98	1523.16
tr|A9JS25|A9JS25_XENLA	rnf20.L	E3 ubiquitin protein ligase OS=Xenopus laevis OX=8355 GN=rnf20.L PE=1 SV=1	803	4	C	UR	722.486	592.011	256.216	302.846	240.379	214.1
tr|A0A1L8EZ03|A0A1L8EZ03_XENLA	rnf40.L	E3 ubiquitin protein ligase OS=Xenopus laevis OX=8355 GN=rnf40.L PE=3 SV=1	803	3	C	UR	1174.99	903.513	212.564	232.262	214.234	259.066
tr|Q6DJH7|Q6DJH7_XENLA	sord.L	Sord-prov protein OS=Xenopus laevis OX=8355 GN=sord.L PE=2 SV=1	804	7	C	UR	1420.17	1482.95	1612.49	1713.98	1811.32	2201.98
tr|Q3I527|Q3I527_XENLA	papolg.L	Polynucleotide adenylyltransferase OS=Xenopus laevis OX=8355 GN=papolg.L PE=2 SV=1	805	4	C	UR	380.937	383.039	423.492	368.145	301.993	321.385
tr|A0A1L8FDS0|A0A1L8FDS0_XENLA	EIF3A	Eukaryotic translation initiation factor 3 subunit A OS=Xenopus laevis OX=8355 GN=EIF3A PE=1 SV=1	806	30	C	UR	3392.1	4106.35	4908.01	4642.28	5760.62	5793.94
tr|A0A1L8FIA3|A0A1L8FIA3_XENLA	EIF3A	Eukaryotic translation initiation factor 3 subunit A OS=Xenopus laevis OX=8355 GN=EIF3A PE=3 SV=1	806	7	C	UR	688.273	791.036	1081.74	1064.67	1421.7	1405.07
tr|Q6NTZ7|Q6NTZ7_XENLA	nrbp1.L	MGC81395 protein OS=Xenopus laevis OX=8355 GN=nrbp1.L PE=1 SV=1	808	1	C	UR	55.258	49.4383	57.9511	69.4826	68.7183	82.362
tr|A0A1L8FS31|A0A1L8FS31_XENLA	elp2.S	Elongator complex protein 2 OS=Xenopus laevis OX=8355 GN=elp2.S PE=1 SV=1	809	8	C	UR	1011.45	952.601	1252.75	1137.78	1050.53	979.696
tr|Q6NS03|Q6NS03_XENLA	xpo1.S	Xpo1 protein OS=Xenopus laevis OX=8355 GN=xpo1.S PE=1 SV=1	810	12	C	UR	2168.55	2036.8	1152.97	1164.5	1212.73	1044.97
tr|B7ZQX4|B7ZQX4_XENLA	kpna3.S	Importin subunit alpha OS=Xenopus laevis OX=8355 GN=kpna3.S PE=1 SV=1	811	5	C	UR	540.631	599.356	579.425	581.103	586.732	656.627
tr|Q6NS18|Q6NS18_XENLA	kpna4.S	Importin subunit alpha OS=Xenopus laevis OX=8355 GN=kpna4.S PE=2 SV=1	811	2	C	UR	220.931	228.759	258.555	254.464	292.665	254.675
tr|A0A1L8FLR1|A0A1L8FLR1_XENLA	XELAEV_18035488mg	Uncharacterized protein OS=Xenopus laevis OX=8355 GN=XELAEV_18035488mg PE=1 SV=1	812	13	C	UR	2207.48	2202.98	1167.62	1275.67	1230.91	1347.73
tr|Q7ZYM9|Q7ZYM9_XENLA	ppp2r1b.S	Ppp2r1b protein OS=Xenopus laevis OX=8355 GN=ppp2r1b.S PE=2 SV=1	812	2	C	UR	218.173	167.913	128.269	139.411	131.206	136.851
tr|Q92138|Q92138_XENLA	PP2A	Phosphorylase phosphatase OS=Xenopus laevis OX=8355 GN=PP2A PE=2 SV=1	812	1	C	UR	151.53	128.161	73.6038	91.0054	87.0578	95.3509
tr|A0A1L8HYD0|A0A1L8HYD0_XENLA	XELAEV_18006685mg	15-oxoprostaglandin 13-reductase OS=Xenopus laevis OX=8355 GN=XELAEV_18006685mg PE=1 SV=1	813	10	C	UR	1211.2	1436.92	1608.17	1654.84	2020.59	2098.99
tr|A0A1L8GAK8|A0A1L8GAK8_XENLA	dhx36.L	RNA helicase OS=Xenopus laevis OX=8355 GN=dhx36.L PE=1 SV=1	814	18	C	UR	4645.94	3842.26	1419.13	1291.35	1598.52	1466.33
tr|A0A1L8G7N6|A0A1L8G7N6_XENLA	dhx57.L	Uncharacterized protein OS=Xenopus laevis OX=8355 GN=dhx57.L PE=1 SV=1	814	5	C	UR	1012.14	846.332	588.626	601.434	473.084	584.277
sp|P45593|COF1B_XENLA	cfl1-b	Cofilin-1-B OS=Xenopus laevis OX=8355 GN=cfl1-b PE=1 SV=3	815	2	C	UR	222.249	269.671	259.103	340.642	391.777	446.677
sp|P45695|COF1A_XENLA	cfl1-a	Cofilin-1-A OS=Xenopus laevis OX=8355 GN=cfl1-a PE=1 SV=3	815	15	C	UR	1810.77	2158.44	2352.15	2381.1	2800.72	2933.11
tr|Q6PGS8|Q6PGS8_XENLA	acad8.L	MGC64378 protein OS=Xenopus laevis OX=8355 GN=acad8.L PE=1 SV=1	816	11	C	UR	1735.69	1419.18	1394.85	1212.1	1086.51	972.592
tr|A0A310UFF6|A0A310UFF6_XENLA	XELAEV_18004106mg	Uncharacterized protein OS=Xenopus laevis OX=8355 GN=XELAEV_18004106mg PE=1 SV=1	817	1	C	UR	93.2888	72.9451	60.0309	63.9844	72.9821	77.6636
tr|A0A1L8EU65|A0A1L8EU65_XENLA	pxmp4.L	Uncharacterized protein OS=Xenopus laevis OX=8355 GN=pxmp4.L PE=4 SV=1	818	1	C	UR	123.914	135.57	779.133	1044.77	94.0726	53.5993
tr|A0A1L8HAL3|A0A1L8HAL3_XENLA	XELAEV_18016163mg	Uncharacterized protein OS=Xenopus laevis OX=8355 GN=XELAEV_18016163mg PE=1 SV=1	819	1	C	UR	68.9199	71.9889	72.6143	54.6057	56.3737	60.1082
tr|A0A1L8HUJ2|A0A1L8HUJ2_XENLA	XELAEV_18005498mg	Uncharacterized protein OS=Xenopus laevis OX=8355 GN=XELAEV_18005498mg PE=1 SV=1	819	28	C	UR	5813.4	4722.14	3131.71	2649.23	3622.36	3196.14
tr|A0A1L8HLN3|A0A1L8HLN3_XENLA	XELAEV_18009233mg	Uncharacterized protein OS=Xenopus laevis OX=8355 GN=XELAEV_18009233mg PE=1 SV=1	819	6	C	UR	848.119	767.295	523.404	482.929	631.324	611.159
sp|P23330|TBG1_XENLA	tubg1	Tubulin gamma-1 chain OS=Xenopus laevis OX=8355 GN=tubg1 PE=1 SV=1	820	22	C	UR	4578.66	4937.57	3886.55	3940.4	1046.65	1052.1
tr|Q5PQ98|Q5PQ98_XENLA	tubg1.S	Tubulin gamma chain OS=Xenopus laevis OX=8355 GN=tubg1.S PE=1 SV=1	820	5	C	UR	324.11	357.517	353.095	261.133	125.611	153.048
tr|Q52L18|Q52L18_XENLA	wdr3.S	LOC443590 protein OS=Xenopus laevis OX=8355 GN=wdr3.S PE=2 SV=1	821	3	C	UR	374.496	330.591	314.369	332.638	369.236	341.44
tr|A0A1L8GJU2|A0A1L8GJU2_XENLA	ints5.L	Uncharacterized protein OS=Xenopus laevis OX=8355 GN=ints5.L PE=4 SV=1	822	1	C	UR	78.4996	72.9855	78.2902	79.107	68.2774	63.5358
tr|A9ULW7|A9ULW7_XENLA	fnta.S	LOC100137632 protein OS=Xenopus laevis OX=8355 GN=fnta.S PE=2 SV=1	823	11	C	UR	1439.07	1407.24	1445.42	1624.95	1631.41	1604.24
tr|A0A1L8EX00|A0A1L8EX00_XENLA	fastkd2.L	RAP domain-containing protein OS=Xenopus laevis OX=8355 GN=fastkd2.L PE=4 SV=1	824	1	C	UR	78.5796	60.8539	97.2559	103.339	67.952	73.8402
tr|A0A1L8F773|A0A1L8F773_XENLA	XELAEV_18038737mg	Phosphatidylinositol-3-phosphate phosphatase OS=Xenopus laevis OX=8355 GN=XELAEV_18038737mg PE=1 SV=1	825	4	C	UR	279.114	294.819	422.904	379.372	297.652	306.011
tr|A0A1L8F8K0|A0A1L8F8K0_XENLA	ehmt2.L	Uncharacterized protein OS=Xenopus laevis OX=8355 GN=ehmt2.L PE=1 SV=1	827	2	C	UR	122.962	109.712	100.978	80.0364	79.2236	87.7987
tr|A0A1L8H328|A0A1L8H328_XENLA	cc2d1a.L	C2 domain-containing protein OS=Xenopus laevis OX=8355 GN=cc2d1a.L PE=1 SV=1	828	3	C	UR	244.436	247.717	224.215	204.636	197.532	189.697
tr|Q6INT0|Q6INT0_XENLA	top2a.L	DNA topoisomerase 2 OS=Xenopus laevis OX=8355 GN=top2a.L PE=1 SV=1	829	7	C	UR	626.715	821.828	901.422	861.2	658.163	888.15
tr|A0A1L8H020|A0A1L8H020_XENLA	mpi.L	Mannose-6-phosphate isomerase OS=Xenopus laevis OX=8355 GN=mpi.L PE=3 SV=1	830	1	C	UR	67.1027	96.3384	99.5901	107.69	108.817	126.339
tr|B7ZQZ7|B7ZQZ7_XENLA	caprin1.L	Uncharacterized protein OS=Xenopus laevis OX=8355 GN=caprin1.L PE=2 SV=1	831	4	C	UR	482.194	490.659	535.565	622.754	658.938	615.068
tr|Q5U577|Q5U577_XENLA	eml1.S	LOC495344 protein OS=Xenopus laevis OX=8355 GN=eml1.S PE=2 SV=1	832	6	C	UR	830.091	831.304	923.773	823.527	1114.33	980.697
tr|A0A1L8F870|A0A1L8F870_XENLA	XELAEV_18039061mg	WD_REPEATS_REGION domain-containing protein OS=Xenopus laevis OX=8355 GN=XELAEV_18039061mg PE=3 SV=1	832	11	C	UR	1233.3	1135.26	1253.75	1119.38	1344.71	1275.71
tr|A0A1L8HNE7|A0A1L8HNE7_XENLA	rab11b.2.S	Uncharacterized protein OS=Xenopus laevis OX=8355 GN=rab11b.2.S PE=4 SV=1	833	2	C	UR	412.286	374.206	390.688	486.567	449.916	616.622
tr|A0A1L8I314|A0A1L8I314_XENLA	mtarc1.L	MOSC domain-containing protein OS=Xenopus laevis OX=8355 GN=mtarc1.L PE=1 SV=1	834	1	C	UR	71.6069	53.8233	75.5938	81.7668	60.0207	65.5111
tr|Q32N37|Q32N37_XENLA	LOC398450	GDP-4-keto-6-deoxy-D-mannose-3,5-epimerase-4-reductase (Fragment) OS=Xenopus laevis OX=8355 GN=LOC398450 PE=2 SV=1	835	9	C	UR	874.61	987.723	1006.79	1251.31	1197.76	1459.41
tr|A0A1L8GN13|A0A1L8GN13_XENLA	sh3glb1.L	Endophilin-B1 OS=Xenopus laevis OX=8355 GN=sh3glb1.L PE=1 SV=1	836	1	C	UR	86.1578	85.1715	105.358	112.904	102.496	116.097
tr|A0A1L8F6B2|A0A1L8F6B2_XENLA	gtf3c4.L	Uncharacterized protein OS=Xenopus laevis OX=8355 GN=gtf3c4.L PE=1 SV=1	837	6	C	UR	1544.17	1238.21	714.898	757.572	606.889	611.752
tr|A0A1L8EKW5|A0A1L8EKW5_XENLA	XELAEV_18045969mg	Uncharacterized protein OS=Xenopus laevis OX=8355 GN=XELAEV_18045969mg PE=1 SV=1	838	4	C	UR	321.599	293.372	329.88	376.911	404.009	434.035
sp|Q91572|CPE1A_XENLA	cpeb1-a	Cytoplasmic polyadenylation element-binding protein 1-A OS=Xenopus laevis OX=8355 GN=cpeb1-a PE=1 SV=2	839	1	C	UR	80.2976	77.9178	111.136	119.341	66.4318	84.6495
tr|O93513|O93513_XENLA	orc3.S	Origin recognition complex subunit 3 OS=Xenopus laevis OX=8355 GN=orc3.S PE=2 SV=1	840	2	C	UR	202.214	174.001	152.35	178.488	149.281	176.401
tr|A0A1L8F643|A0A1L8F643_XENLA	psmd5.L	26S proteasome non-ATPase regulatory subunit 5 OS=Xenopus laevis OX=8355 GN=psmd5.L PE=1 SV=1	841	3	C	UR	285.117	285.821	313.884	342.691	327.467	430.69
sp|Q6GP04|MON2_XENLA	mon2	Protein MON2 homolog OS=Xenopus laevis OX=8355 GN=mon2 PE=2 SV=1	842	6	C	UR	890.202	942.005	944.8	939.255	1068.11	1123.46
tr|A0A1L8ESM5|A0A1L8ESM5_XENLA	XELAEV_18043434mg	UBC core domain-containing protein OS=Xenopus laevis OX=8355 GN=XELAEV_18043434mg PE=1 SV=1	843	8	C	UR	1071.86	958.046	926.503	1037.41	1095.05	1208.12
tr|A0A1L8ELD8|A0A1L8ELD8_XENLA	ube2v1.S	UBC core domain-containing protein OS=Xenopus laevis OX=8355 GN=ube2v1.S PE=4 SV=1	843	2	C	UR	294.025	280.878	284.481	300.937	334.699	375.698
tr|Q802B7|Q802B7_XENLA	ndufs1.L	NADH-ubiquinone oxidoreductase 75 kDa subunit, mitochondrial OS=Xenopus laevis OX=8355 GN=ndufs1.L PE=1 SV=1	844	1	C	UR	48.8066	42.8414	37.0459	39.1867	42.8051	51.421
sp|P70032|PLK1_XENLA	plk1	Serine/threonine-protein kinase PLK1 OS=Xenopus laevis OX=8355 GN=plk1 PE=1 SV=1	845	17	C	UR	1911.85	1784.89	3588.03	3871.78	2499.42	2264.37
tr|A0A1L8EYC7|A0A1L8EYC7_XENLA	plk1.L	Serine/threonine-protein kinase PLK OS=Xenopus laevis OX=8355 GN=plk1.L PE=1 SV=1	845	2	C	UR	146.803	135.888	271.182	333.932	193.036	191.021
tr|A0A1L8G0J5|A0A1L8G0J5_XENLA	XELAEV_18032548mg	Uncharacterized protein OS=Xenopus laevis OX=8355 GN=XELAEV_18032548mg PE=1 SV=1	846	1	C	UR	117.878	131.921	104.127	143.48	126.416	155.569
tr|A0A1L8HQR6|A0A1L8HQR6_XENLA	XELAEV_18010661mg	LsmAD domain-containing protein OS=Xenopus laevis OX=8355 GN=XELAEV_18010661mg PE=3 SV=1	847	7	C	UR	2031.98	1662.19	1070.3	790.854	737.607	711.772
tr|A0A1L8I198|A0A1L8I198_XENLA	XELAEV_18007855mg	LsmAD domain-containing protein OS=Xenopus laevis OX=8355 GN=XELAEV_18007855mg PE=1 SV=1	847	1	C	UR	147.661	114.942	78.6483	65.6085	57.9697	58.1112
tr|A0A1L8HXW7|A0A1L8HXW7_XENLA	XELAEV_18006732mg	DUF3730 domain-containing protein OS=Xenopus laevis OX=8355 GN=XELAEV_18006732mg PE=1 SV=1	848	7	C	UR	773.595	661.993	625.292	723.375	666.385	590.522
tr|Q07CZ6|Q07CZ6_XENLA	chaf1b.L	Chromatin assembly factor-1 p60 subunit OS=Xenopus laevis OX=8355 GN=chaf1b.L PE=2 SV=1	849	3	C	UR	316.612	356.218	370.428	375.5	408.952	446.366
tr|Q7ZTJ4|Q7ZTJ4_XENLA	atp6v1b2.S	Vacuolar proton pump subunit B OS=Xenopus laevis OX=8355 GN=atp6v1b2.S PE=2 SV=1	850	19	C	UR	3179.08	2944.85	2614.26	2537.72	3001.17	3164.28
tr|A7VK04|A7VK04_XENLA	cul5.L	Cullin5 OS=Xenopus laevis OX=8355 GN=cul5.L PE=2 SV=1	851	4	C	UR	464.203	538.978	498.947	546.94	496.458	466.053
tr|A0A1L8HG08|A0A1L8HG08_XENLA	brip1.L	Helicase ATP-binding domain-containing protein OS=Xenopus laevis OX=8355 GN=brip1.L PE=1 SV=1	852	2	C	UR	181.873	198.569	154.832	148.003	160.616	179.779
tr|A0A1L8FT85|A0A1L8FT85_XENLA	vcpip1.S	Ubiquitinyl hydrolase 1 OS=Xenopus laevis OX=8355 GN=vcpip1.S PE=1 SV=1	853	7	C	UR	597.786	555.199	985.13	857.67	879.957	864.87
tr|A0A1L8HTT3|A0A1L8HTT3_XENLA	XELAEV_18005305mg	AIR carboxylase OS=Xenopus laevis OX=8355 GN=XELAEV_18005305mg PE=3 SV=1	854	33	C	UR	4700.81	4730.75	5209.31	5850.66	6220.04	6581.76
tr|Q6GLT0|Q6GLT0_XENLA	paics.1.S	AIR carboxylase OS=Xenopus laevis OX=8355 GN=paics.1.S PE=2 SV=1	854	4	C	UR	1064.15	1420.05	1418.84	1247.42	1106.81	1258
tr|Q91855|Q91855_XENLA	SUP35	SUP35 protein (Fragment) OS=Xenopus laevis OX=8355 GN=SUP35 PE=1 SV=1	855	9	C	UR	1458.5	1537.73	1597.39	1529.15	1947.15	1889.12
tr|A0A248RGK4|A0A248RGK4_XENLA	EIF3F	Eukaryotic translation initiation factor 3 subunit F OS=Xenopus laevis OX=8355 GN=EIF3F PE=2 SV=1	856	5	C	UR	406.647	428.03	581.72	654.07	598.227	846.168
tr|A0A1L8FCB7|A0A1L8FCB7_XENLA	naxe.L	NAD(P)H-hydrate epimerase OS=Xenopus laevis OX=8355 GN=naxe.L PE=1 SV=1	857	3	C	UR	363.024	364.479	400.11	418.008	424.754	472.658
tr|Q2TAV8|Q2TAV8_XENLA	wdhd1.L	Wdhd1 protein OS=Xenopus laevis OX=8355 GN=wdhd1.L PE=2 SV=1	858	16	C	UR	2466.13	2335.84	2295.31	1903.14	1984.3	2028.19
sp|Q6NRT5|CSN1_XENLA	csn1	COP9 signalosome complex subunit 1 OS=Xenopus laevis OX=8355 GN=csn1 PE=2 SV=1	859	5	C	UR	1087.69	980.584	1028.91	1281.77	1240.12	1288.08
tr|A0A1L8G2B6|A0A1L8G2B6_XENLA	memo1.S	Mediator of ErbB2-driven cell motility 1 OS=Xenopus laevis OX=8355 GN=memo1.S PE=3 SV=1	861	12	C	UR	4402.39	2758.73	763.11	711.788	915.866	782.707
sp|Q640K1|NCDN_XENLA	ncdn	Neurochondrin OS=Xenopus laevis OX=8355 GN=ncdn PE=2 SV=1	863	6	C	UR	892.999	992.451	820.638	965.849	902.799	1030.28
tr|Q5PQ14|Q5PQ14_XENLA	mtmr9.L	LOC496015 protein OS=Xenopus laevis OX=8355 GN=mtmr9.L PE=2 SV=1	864	6	C	UR	390.728	340.31	426.726	508.175	310.709	304.216
sp|Q4V7N8|CPIN1_XENLA	ciapin1	Anamorsin OS=Xenopus laevis OX=8355 GN=ciapin1 PE=2 SV=2	865	8	C	UR	1228.83	1306.7	1548.85	1965.92	1857.67	2286.16
tr|A0A1L8GZX1|A0A1L8GZX1_XENLA	XELAEV_18018015mg	Uncharacterized protein OS=Xenopus laevis OX=8355 GN=XELAEV_18018015mg PE=1 SV=1	866	10	C	UR	1148.29	1030.28	1211.06	1204.85	992.653	1228.05
tr|Q68FI9|Q68FI9_XENLA	csrp2.L	MGC86339 protein OS=Xenopus laevis OX=8355 GN=csrp2.L PE=2 SV=1	868	3	C	UR	703.48	717.984	727.38	712.208	880.671	865.267
tr|Q66J46|Q66J46_XENLA	csrp2.S	MGC81964 protein OS=Xenopus laevis OX=8355 GN=csrp2.S PE=2 SV=1	868	2	C	UR	158.061	140.113	138.383	136.2	176.076	161.966
tr|Q6GMC1|Q6GMC1_XENLA	rps27a.S	40S ribosomal protein S27a OS=Xenopus laevis OX=8355 GN=rps27a.S PE=2 SV=1	869	10	C	UR	1654.32	956.646	966.885	1027.41	1110.72	1016.74
sp|P62972|UBIQP_XENLA		Polyubiquitin (Fragment) OS=Xenopus laevis OX=8355 PE=1 SV=2	869	61	C	UR	12212.4	7052.26	5721.25	5618.11	6849.7	5838.68
tr|Q66IZ6|Q66IZ6_XENLA	nup37.L	MGC83926 protein OS=Xenopus laevis OX=8355 GN=nup37.L PE=1 SV=1	870	7	C	UR	1797.72	1307.33	1019.59	978.563	1019.29	977.609
tr|A0A1L8HFM2|A0A1L8HFM2_XENLA	kdm1a.L	Lysine-specific histone demethylase OS=Xenopus laevis OX=8355 GN=kdm1a.L PE=1 SV=1	871	16	C	UR	2704.21	2006.66	1461.64	1291.94	1036.56	1051.31
tr|A9P535|A9P535_XENLA		LSD1 (Fragment) OS=Xenopus laevis OX=8355 PE=2 SV=1	871	3	C	UR	1151.69	1053.02	796.914	708.351	517.53	568.625
sp|Q6AZT6|DEPD7_XENLA	depdc7	DEP domain-containing protein 7 OS=Xenopus laevis OX=8355 GN=depdc7 PE=2 SV=1	872	11	C	UR	2076.44	4210.93	1356.51	1200.8	871.837	901.189
tr|A0A1L8GDA6|A0A1L8GDA6_XENLA	XELAEV_18024414mg	DEP domain-containing protein OS=Xenopus laevis OX=8355 GN=XELAEV_18024414mg PE=4 SV=1	872	4	C	UR	310.459	531.237	240.891	234.079	197.119	175.804
tr|A0A1L8H723|A0A1L8H723_XENLA	dhrs11.S	Uncharacterized protein OS=Xenopus laevis OX=8355 GN=dhrs11.S PE=1 SV=1	873	5	C	UR	478.376	455.032	517.043	599.929	587.991	608.223
xenopus_gTuNA		cleaved mutant sequence	874	9	C	UR	653.915	442.044	2042.45	1265.86	2135.13	1963.87
tr|Q4V835|Q4V835_XENLA	hells.L	HELLS protein OS=Xenopus laevis OX=8355 GN=hells.L PE=1 SV=1	875	19	C	UR	1806.68	3204.43	4055.82	3477.27	2025.92	2115.37
tr|A0A310TPD9|A0A310TPD9_XENLA	XELAEV_18004506mg	Uncharacterized protein OS=Xenopus laevis OX=8355 GN=XELAEV_18004506mg PE=1 SV=1	875	3	C	UR	511.039	792.231	834.733	733.464	456.349	384.897
tr|Q4QQZ3|Q4QQZ3_XENLA	ppih.L	Peptidyl-prolyl cis-trans isomerase OS=Xenopus laevis OX=8355 GN=ppih.L PE=1 SV=1	876	9	C	UR	1890.18	1664.17	1303.67	1325.37	1340.94	1407.33
tr|A0A1L8GHM8|A0A1L8GHM8_XENLA	txnrd3.S	Thioredoxin-disulfide reductase OS=Xenopus laevis OX=8355 GN=txnrd3.S PE=1 SV=1	877	2	C	UR	323.848	208.969	192.942	163.165	195.803	172.193
tr|Q66J56|Q66J56_XENLA	txnrd3.L	Thioredoxin-disulfide reductase OS=Xenopus laevis OX=8355 GN=txnrd3.L PE=1 SV=1	877	14	C	UR	2054.82	1964.3	2181.99	2248.76	2403.46	2486.06
tr|A0A1L8G7J1|A0A1L8G7J1_XENLA	ugp2.L	UTP--glucose-1-phosphate uridylyltransferase OS=Xenopus laevis OX=8355 GN=ugp2.L PE=1 SV=1	878	12	C	UR	1362.19	1503.42	1339.38	1519.01	1515.79	1622.27
tr|A0A1L8EV48|A0A1L8EV48_XENLA	XELAEV_18044306mg	60S ribosomal protein L13a OS=Xenopus laevis OX=8355 GN=XELAEV_18044306mg PE=3 SV=1	879	7	C	UR	1054.81	1332.03	1540.84	1948.4	1803.91	1652.07
tr|A0A1L8ENM5|A0A1L8ENM5_XENLA	rpl13a.S	60S ribosomal protein L13a OS=Xenopus laevis OX=8355 GN=rpl13a.S PE=3 SV=1	879	1	C	UR	70.8656	125.421	132.312	222.384	183.85	162.469
sp|Q7ZTM9|EIF3D_XENLA	eif3d	Eukaryotic translation initiation factor 3 subunit D OS=Xenopus laevis OX=8355 GN=eif3d PE=2 SV=1	880	19	C	UR	1576.34	1795.44	2273.77	2076.02	2523.99	2477.06
sp|Q6GLT8|FAHD2_XENLA	fahd2	Fumarylacetoacetate hydrolase domain-containing protein 2 OS=Xenopus laevis OX=8355 GN=fahd2 PE=2 SV=1	881	10	C	UR	1146.23	1048.38	1035.79	1155.46	1178.82	1314.52
tr|A0A1L8H1M1|A0A1L8H1M1_XENLA	fahd2a.L	FAA_hydrolase domain-containing protein OS=Xenopus laevis OX=8355 GN=fahd2a.L PE=1 SV=1	881	1	C	UR	221.957	204.881	206.976	217.606	270.371	284.366
tr|A0A1L8FPI6|A0A1L8FPI6_XENLA	XELAEV_18036483mg	Uncharacterized protein OS=Xenopus laevis OX=8355 GN=XELAEV_18036483mg PE=4 SV=1	882	2	C	UR	137.055	122.653	131.051	133.943	148.635	136.28
tr|Q6GQB6|Q6GQB6_XENLA	g3bp1.S	MGC80186 protein OS=Xenopus laevis OX=8355 GN=g3bp1.S PE=1 SV=1	883	13	C	UR	1660.56	1597.42	1544.55	1575.35	1813.2	1797.57
tr|Q7ZXC7|Q7ZXC7_XENLA	g3bp1.L	G3bp-prov protein OS=Xenopus laevis OX=8355 GN=g3bp1.L PE=1 SV=1	883	4	C	UR	399.312	342.066	263.928	296.78	311.671	315.866
tr|A0A1L8HMF0|A0A1L8HMF0_XENLA	g3bp2.S	Uncharacterized protein OS=Xenopus laevis OX=8355 GN=g3bp2.S PE=4 SV=1	883	10	C	UR	1764.23	1471.8	1176.33	1250.52	1190.01	1181.39
tr|Q6DFK7|Q6DFK7_XENLA	g3bp2.L	MGC81268 protein OS=Xenopus laevis OX=8355 GN=g3bp2.L PE=1 SV=1	883	4	C	UR	989.736	910.458	753.132	772.564	785.221	818.941
tr|Q566I2|Q566I2_XENLA	cul1.S	MGC115014 protein OS=Xenopus laevis OX=8355 GN=cul1.S PE=2 SV=1	884	11	C	UR	3354.63	2903.32	1888.42	2020.04	2099.8	1836.65
tr|Q7ZXF2|Q7ZXF2_XENLA	hnrnpa0.S	Hnrpa0-prov protein OS=Xenopus laevis OX=8355 GN=hnrnpa0.S PE=2 SV=1	885	5	C	UR	1139.99	846.855	960.493	786.146	669.795	591.524
tr|Q7ZYU2|Q7ZYU2_XENLA	hnrnpa0.L	LOC398455 protein (Fragment) OS=Xenopus laevis OX=8355 GN=hnrnpa0.L PE=1 SV=1	885	4	C	UR	695.506	643.307	765.202	602.17	464.228	442.138
sp|P51992|RO32_XENLA		Heterogeneous nuclear ribonucleoprotein A3 homolog 2 OS=Xenopus laevis OX=8355 PE=2 SV=1	885	10	C	UR	3958.52	3923.37	3957.03	3532.59	2919.89	2600.37
sp|P17130|ROA1_XENLA	hnrnpa1	Heterogeneous nuclear ribonucleoproteins A1 homolog OS=Xenopus laevis OX=8355 GN=hnrnpa1 PE=2 SV=1	885	7	C	UR	2012.73	1874.63	2076.16	1860.05	1533.1	1383.73
tr|Q7ZX33|Q7ZX33_XENLA	hnrnpa1.S	Helix-destabilizing protein OS=Xenopus laevis OX=8355 GN=hnrnpa1.S PE=2 SV=1	885	1	C	UR	109.931	84.5349	91.6408	95.5837	87.4968	101.254
sp|P51989|RO21_XENLA		Heterogeneous nuclear ribonucleoprotein A2 homolog 1 OS=Xenopus laevis OX=8355 PE=2 SV=1	885	2	C	UR	350.963	342.429	288.112	232.348	276.562	224.86
sp|P51990|RO22_XENLA		Heterogeneous nuclear ribonucleoprotein A2 homolog 2 OS=Xenopus laevis OX=8355 PE=2 SV=1	885	1	C	UR	132.606	112.057	104.397	98.89	92.3119	85.7381
sp|A9ULZ2|BIR7B_XENLA	birc7-b	Baculoviral IAP repeat-containing protein 7-B OS=Xenopus laevis OX=8355 GN=birc7-b PE=2 SV=2	886	14	C	UR	1153.65	1031.11	961.082	913.7	1096.32	1015.97
sp|Q8JHV9|BIR7A_XENLA	birc7-a	Baculoviral IAP repeat-containing protein 7-A OS=Xenopus laevis OX=8355 GN=birc7-a PE=1 SV=1	886	13	C	UR	1711.84	1356.74	1429.82	1250.81	1333.51	1213.46
tr|Q8AVT3|Q8AVT3_XENLA	paip2b.L	Paip2-prov protein OS=Xenopus laevis OX=8355 GN=paip2b.L PE=2 SV=1	887	1	C	UR	70.9391	55.2003	67.1314	64.3481	62.4197	63.1027
tr|A2RV94|A2RV94_XENLA	psmd8.L	26S proteasome non-ATPase regulatory subunit 8 OS=Xenopus laevis OX=8355 GN=psmd8.L PE=2 SV=1	888	8	C	UR	1268.88	1579.62	2328.51	2349.53	2644.08	2476.44
tr|B7ZQB4|B7ZQB4_XENLA	CNBP	CNBP protein OS=Xenopus laevis OX=8355 GN=CNBP PE=2 SV=1	889	3	C	UR	246.913	205.901	277.249	143.996	222.802	189.534
tr|A0A1L8GD42|A0A1L8GD42_XENLA	sf1.S	Branchpoint-bridging protein OS=Xenopus laevis OX=8355 GN=sf1.S PE=1 SV=1	890	3	C	UR	822.908	770.994	821.268	686.637	652.628	654.766
tr|A0A1L8HTX2|A0A1L8HTX2_XENLA	XELAEV_18005306mg	Amidophosphoribosyltransferase OS=Xenopus laevis OX=8355 GN=XELAEV_18005306mg PE=1 SV=1	891	8	C	UR	874.565	1011.38	953.833	958.106	1083.3	1165.58
tr|A0A1L8GSI6|A0A1L8GSI6_XENLA	ints14.S	Integrator complex subunit 14 OS=Xenopus laevis OX=8355 GN=ints14.S PE=1 SV=1	892	1	C	UR	68.0771	82.3397	82.7206	54.9221	26.0389	33.877
sp|Q7ZXE9|TES_XENLA	tes	Testin OS=Xenopus laevis OX=8355 GN=tes PE=2 SV=1	893	1	C	UR	89.5957	74.5523	69.3524	96.9263	95.6732	92.5061
tr|A0A1L8GW91|A0A1L8GW91_XENLA	XELAEV_18016746mg	Uncharacterized protein OS=Xenopus laevis OX=8355 GN=XELAEV_18016746mg PE=1 SV=1	894	3	C	UR	347.382	285.189	289.674	259.419	304.964	290.944
tr|A0A1L8F3Q8|A0A1L8F3Q8_XENLA	XELAEV_18042446mg	Carn_acyltransf domain-containing protein OS=Xenopus laevis OX=8355 GN=XELAEV_18042446mg PE=1 SV=1	895	2	C	UR	292.774	228.751	220.527	233.669	233.471	218.254
tr|A0A1L8EXT4|A0A1L8EXT4_XENLA	XELAEV_18045249mg	Uncharacterized protein OS=Xenopus laevis OX=8355 GN=XELAEV_18045249mg PE=4 SV=1	896	1	C	UR	437.35	380.181	439.826	385.923	478.401	517.526
sp|Q6NRZ4|CERT_XENLA	cert1	Ceramide transfer protein OS=Xenopus laevis OX=8355 GN=cert1 PE=2 SV=1	897	5	C	UR	774.251	902.628	1045.83	1119.08	1228.83	1382.62
tr|A0A1L8FT76|A0A1L8FT76_XENLA	XELAEV_18033780mg	SEC7 domain-containing protein OS=Xenopus laevis OX=8355 GN=XELAEV_18033780mg PE=1 SV=1	898	4	C	UR	921.259	914.955	631.328	601.003	661.769	611.841
tr|A0A1L8EMJ0|A0A1L8EMJ0_XENLA	dhx35.S	RNA helicase OS=Xenopus laevis OX=8355 GN=dhx35.S PE=1 SV=1	899	3	C	UR	300.096	270.947	206.984	190.761	131.838	133.121
sp|Q4QR58|EIF3C_XENLA	eif3c	Eukaryotic translation initiation factor 3 subunit C OS=Xenopus laevis OX=8355 GN=eif3c PE=2 SV=1	900	18	C	UR	1878.22	2439.45	3668.49	3226.77	4136.4	3999.32
tr|Q6IP78|Q6IP78_XENLA	LOC432230	LOC432230 protein (Fragment) OS=Xenopus laevis OX=8355 GN=LOC432230 PE=2 SV=1	900	3	C	UR	751.3	761.02	1105.44	1020.6	1274.11	1266.11
tr|A0A1L8HFG4|A0A1L8HFG4_XENLA	XELAEV_18012515mg	Uncharacterized protein OS=Xenopus laevis OX=8355 GN=XELAEV_18012515mg PE=4 SV=1	901	1	C	UR	102.262	129.796	69.1253	74.0784	69.6341	92.1955
tr|B1WBC4|B1WBC4_XENLA	mib2.S	RING-type E3 ubiquitin transferase OS=Xenopus laevis OX=8355 GN=mib2.S PE=2 SV=1	902	24	C	UR	3206.22	3131	3702.45	2996.47	3881.54	2955.89
tr|Q08AY2|Q08AY2_XENLA	mib2.L	RING-type E3 ubiquitin transferase OS=Xenopus laevis OX=8355 GN=mib2.L PE=2 SV=1	902	9	C	UR	1030.84	1021.18	1131.44	997.299	1216.01	1050.52
tr|A0A1L8FWN4|A0A1L8FWN4_XENLA	tpk1.L	Thiamine pyrophosphokinase OS=Xenopus laevis OX=8355 GN=tpk1.L PE=1 SV=1	904	4	C	UR	342.838	371.784	398.02	392.512	424.05	495.646
tr|Q7T0P9|Q7T0P9_XENLA	pgm3.L	Phosphoacetylglucosamine mutase OS=Xenopus laevis OX=8355 GN=pgm3.L PE=2 SV=1	905	8	C	UR	818.175	883.674	924.168	1080.91	1357.29	1342.94
tr|Q6INS0|Q6INS0_XENLA	gstt1.L	Glutathione transferase OS=Xenopus laevis OX=8355 GN=gstt1.L PE=2 SV=1	906	9	C	UR	1327.84	1385.3	1304.29	1570.83	1603.24	1568.91
tr|A0A1L8H5P9|A0A1L8H5P9_XENLA	trappc10.S	Uncharacterized protein OS=Xenopus laevis OX=8355 GN=trappc10.S PE=4 SV=1	907	3	C	UR	521.348	476.851	536.778	496.726	327.405	349.583
tr|Q7ZXB0|Q7ZXB0_XENLA	LOC398438	LOC398438 protein (Fragment) OS=Xenopus laevis OX=8355 GN=LOC398438 PE=2 SV=1	908	2	C	UR	139.405	373	673.582	514.533	686.601	806.906
tr|A0A1L8GHV4|A0A1L8GHV4_XENLA	XELAEV_18025928mg	RBR-type E3 ubiquitin transferase OS=Xenopus laevis OX=8355 GN=XELAEV_18025928mg PE=4 SV=1	909	4	C	UR	381.629	396.557	346.979	463.55	483.275	496.316
sp|Q9YHD3|BAG6A_XENLA	Bag6-a	Large proline-rich protein bag6-A OS=Xenopus laevis OX=8355 GN=Bag6-a PE=2 SV=1	910	9	C	UR	1643.25	1800.95	1283.21	1174.41	1157.96	1323.61
sp|Q6PA26|BAG6B_XENLA	Bag6-b	Large proline-rich protein bag6-B OS=Xenopus laevis OX=8355 GN=Bag6-b PE=2 SV=1	910	1	C	UR	148.816	144.155	98.0156	70.3897	76.5732	103.703
tr|Q7SZ77|Q7SZ77_XENLA	rps11.L	40S ribosomal protein S11 OS=Xenopus laevis OX=8355 GN=rps11.L PE=2 SV=1	911	7	C	UR	948.666	1060.63	1518.03	1811.32	1577.57	2004.3
tr|A0A1L8F0V9|A0A1L8F0V9_XENLA	XELAEV_18041451mg	Uncharacterized protein OS=Xenopus laevis OX=8355 GN=XELAEV_18041451mg PE=1 SV=1	912	2	C	UR	148.632	80.8941	89.9717	77.8295	111.34	89.5297
tr|A0A1L8GTJ2|A0A1L8GTJ2_XENLA	XELAEV_18020868mg	Xpo1 domain-containing protein OS=Xenopus laevis OX=8355 GN=XELAEV_18020868mg PE=1 SV=1	913	9	C	UR	746.506	694.348	619.992	738.826	740.023	715.686
sp|Q6GM65|PLAP_XENLA	plaa	Phospholipase A-2-activating protein OS=Xenopus laevis OX=8355 GN=plaa PE=2 SV=2	914	26	C	UR	2798.2	2628.05	4235.81	3436.22	3647.88	3392.31
tr|Q08B76|Q08B76_XENLA	plaa.L	LOC100158335 protein OS=Xenopus laevis OX=8355 GN=plaa.L PE=2 SV=1	914	7	C	UR	569.025	530.357	905.717	690.895	730.084	681.168
sp|Q6PAF6|AN32A_XENLA	anp32a	Acidic leucine-rich nuclear phosphoprotein 32 family member A OS=Xenopus laevis OX=8355 GN=anp32a PE=2 SV=1	915	1	C	UR	174.006	193.549	180.838	167.839	176.165	225.462
tr|Q6GNU4|Q6GNU4_XENLA	anp32b.L	MGC80871 protein OS=Xenopus laevis OX=8355 GN=anp32b.L PE=1 SV=1	915	3	C	UR	265.657	306.427	353.415	318.27	431.471	469.613
sp|Q8AVC1|AN32B_XENLA	anp32b	Acidic leucine-rich nuclear phosphoprotein 32 family member B OS=Xenopus laevis OX=8355 GN=anp32b PE=2 SV=1	915	4	C	UR	662.902	687.39	766.133	919.97	1030.89	1376.38
tr|A0A1L8GLF8|A0A1L8GLF8_XENLA	cnot1.L	Uncharacterized protein OS=Xenopus laevis OX=8355 GN=cnot1.L PE=1 SV=1	916	15	C	UR	1230.85	1812.06	1468.36	1249.18	1035.37	1143.04
tr|A0A1L8GFC1|A0A1L8GFC1_XENLA	cnot1.S	Uncharacterized protein OS=Xenopus laevis OX=8355 GN=cnot1.S PE=1 SV=1	916	1	C	UR	44.2215	68.8649	58.2345	59.5711	44.6926	43.8928
sp|Q3MV19|TRF6A_XENLA	traf6-a	TNF receptor-associated factor 6-A OS=Xenopus laevis OX=8355 GN=traf6-a PE=1 SV=1	917	3	C	UR	921.48	1017.91	381.827	331.092	383.597	390.482
sp|Q6DJN2|TRF6B_XENLA	traf6-b	TNF receptor-associated factor 6-B OS=Xenopus laevis OX=8355 GN=traf6-b PE=2 SV=1	917	3	C	UR	487.659	475.035	205.226	269.366	195.882	238.832
tr|A0A1L8EMU6|A0A1L8EMU6_XENLA	XELAEV_18046656mg	Protein NDRG3 OS=Xenopus laevis OX=8355 GN=XELAEV_18046656mg PE=1 SV=1	918	4	C	UR	156.375	179.44	201.127	213.937	274.959	313.261
tr|Q8AVH9|Q8AVH9_XENLA	ppp2cal.S	Serine/threonine-protein phosphatase OS=Xenopus laevis OX=8355 GN=ppp2cal.S PE=2 SV=1	919	8	C	UR	1201.61	898.533	518.845	566.781	578.307	560.26
tr|Q92140|Q92140_XENLA	ppp2cb.L	Serine/threonine-protein phosphatase OS=Xenopus laevis OX=8355 GN=ppp2cb.L PE=1 SV=1	919	1	C	UR	113.259	111.091	64.8997	73.6124	73.3568	85.5778
tr|A0A1L8GR14|A0A1L8GR14_XENLA	ppp2ca.S	Serine/threonine-protein phosphatase OS=Xenopus laevis OX=8355 GN=ppp2ca.S PE=1 SV=1	919	1	C	UR	70.0671	57.6917	37.6773	42.238	44.0815	49.5107
sp|Q6IP91|PP4C_XENLA	ppp4c	Serine/threonine-protein phosphatase 4 catalytic subunit OS=Xenopus laevis OX=8355 GN=ppp4c PE=2 SV=1	919	3	C	UR	299.154	290.751	221.111	271.925	255.981	272.314
tr|A0A1L8G3S5|A0A1L8G3S5_XENLA	eif2b5.S	eIF-2B GDP-GTP exchange factor subunit epsilon OS=Xenopus laevis OX=8355 GN=eif2b5.S PE=1 SV=1	920	13	C	UR	1607.2	1555.58	1707.42	1657.39	2116.52	1811.25
tr|A0A1L8HY01|A0A1L8HY01_XENLA	XELAEV_18006667mg	Uncharacterized protein OS=Xenopus laevis OX=8355 GN=XELAEV_18006667mg PE=1 SV=1	921	10	C	UR	980.885	1004.7	1640.27	1315.97	488.495	529.879
tr|Q6X5Y5|Q6X5Y5_XENLA	eps15l1.S	EH domain protein OS=Xenopus laevis OX=8355 GN=eps15l1.S PE=2 SV=1	921	7	C	UR	380.66	420.947	742.824	615.356	265.041	259.367
tr|A0A1L8F0E4|A0A1L8F0E4_XENLA	XELAEV_18041285mg	WD_REPEATS_REGION domain-containing protein OS=Xenopus laevis OX=8355 GN=XELAEV_18041285mg PE=4 SV=1	922	7	C	UR	716.53	733.022	699.456	703.775	862.292	905.763
tr|Q63ZR4|Q63ZR4_XENLA	nploc4.L	LOC494816 protein OS=Xenopus laevis OX=8355 GN=nploc4.L PE=2 SV=1	923	12	C	UR	2404.71	3049.53	1966.79	1672.3	1560.16	1659.74
tr|Q7SZT9|Q7SZT9_XENLA	nploc4.S	Npl4 protein OS=Xenopus laevis OX=8355 GN=nploc4.S PE=1 SV=1	923	3	C	UR	590.205	616.942	421.178	427.981	390.731	420.106
tr|Q505M1|Q505M1_XENLA	csde1.L	MGC114719 protein OS=Xenopus laevis OX=8355 GN=csde1.L PE=2 SV=1	924	6	C	UR	978.649	1017.97	1062	1034.86	1124.8	1208.22
tr|A0A1L8HG59|A0A1L8HG59_XENLA	asl.L	Uncharacterized protein OS=Xenopus laevis OX=8355 GN=asl.L PE=1 SV=1	925	8	C	UR	802.294	1062.78	724.777	864.346	726.907	808.032
tr|Q9I9K6|Q9I9K6_XENLA	pin1.L	Peptidyl-prolyl cis-trans isomerase OS=Xenopus laevis OX=8355 GN=pin1.L PE=1 SV=1	926	4	C	UR	796.925	621.942	620.361	743.07	879.647	875.064
sp|Q6GNQ1|GET3_XENLA	get3	ATPase GET3 OS=Xenopus laevis OX=8355 GN=get3 PE=2 SV=1	927	2	C	UR	243.434	236.788	186.394	202.037	186.872	228.102
sp|Q7ZXP9|PYG1B_XENLA	ctps1-b	CTP synthase 1-B OS=Xenopus laevis OX=8355 GN=ctps1-b PE=2 SV=1	928	25	C	UR	6493.2	4646.9	3633.23	3106.69	2390.38	2153.88
tr|A0A1L8H7M9|A0A1L8H7M9_XENLA	XELAEV_18015103mg	CTP synthase OS=Xenopus laevis OX=8355 GN=XELAEV_18015103mg PE=1 SV=1	928	5	C	UR	702.777	542.77	446.456	453.258	338.695	360.368
sp|Q6GME1|PYRG2_XENLA	ctps2	CTP synthase 2 OS=Xenopus laevis OX=8355 GN=ctps2 PE=2 SV=1	928	5	C	UR	835.119	584.637	514.769	502.362	532.889	512.57
tr|A0A1L8GDJ4|A0A1L8GDJ4_XENLA	XELAEV_18024294mg	Uncharacterized protein OS=Xenopus laevis OX=8355 GN=XELAEV_18024294mg PE=4 SV=1	929	1	C	UR	98.6995	86.6368	74.5194	75.2101	76.8788	83.8377
tr|A0A1L8F5R3|A0A1L8F5R3_XENLA	XELAEV_18038198mg	60S ribosomal protein L12 OS=Xenopus laevis OX=8355 GN=XELAEV_18038198mg PE=1 SV=1	930	8	C	UR	789.631	1103.04	1923.25	2365.83	2316.59	2991.9
tr|Q8AVW0|Q8AVW0_XENLA	rpl12.S	60S ribosomal protein L12 OS=Xenopus laevis OX=8355 GN=rpl12.S PE=2 SV=1	930	2	C	UR	131.279	129.731	212.541	242.297	269.037	302.08
tr|A0A1L8EYQ3|A0A1L8EYQ3_XENLA	XELAEV_18045557mg	LLGL domain-containing protein OS=Xenopus laevis OX=8355 GN=XELAEV_18045557mg PE=1 SV=1	931	1	C	UR	110.46	86.2252	86.2267	93.4227	95.5518	119.449
tr|A0A1L8GWY3|A0A1L8GWY3_XENLA	sec24a.L	Uncharacterized protein OS=Xenopus laevis OX=8355 GN=sec24a.L PE=1 SV=1	932	7	C	UR	711.196	723.616	911.439	866.857	705.635	743.611
tr|A0A1L8HUR0|A0A1L8HUR0_XENLA	sec24b.L	Uncharacterized protein OS=Xenopus laevis OX=8355 GN=sec24b.L PE=1 SV=1	932	5	C	UR	745.873	813.556	770.562	699.71	527.195	532.622
sp|Q7ZXK9|NLE1_XENLA	nle1	Notchless protein homolog 1 OS=Xenopus laevis OX=8355 GN=nle1 PE=2 SV=1	933	19	C	UR	4409.49	2702.69	1760.75	1470.1	2448.58	1858.75
tr|A0A1L8H809|A0A1L8H809_XENLA	nle1.S	Notchless protein homolog 1 OS=Xenopus laevis OX=8355 GN=nle1.S PE=1 SV=1	933	2	C	UR	190.955	94.5735	68.5932	65.1231	84.8084	81.3438
sp|Q5XH36|CRE2A_XENLA	creld2-a	Cysteine-rich with EGF-like domain protein 2-A OS=Xenopus laevis OX=8355 GN=creld2-a PE=2 SV=1	934	2	C	UR	102.63	106.236	114.038	97.572	163.209	157.349
tr|A0A1L8ELM2|A0A1L8ELM2_XENLA	XELAEV_18046289mg	MSP domain-containing protein (Fragment) OS=Xenopus laevis OX=8355 GN=XELAEV_18046289mg PE=4 SV=1	935	2	C	UR	152.367	156.204	189.658	211.648	185.521	269.159
tr|Q7SYQ4|Q7SYQ4_XENLA	prdx6.S	MGC64582 protein OS=Xenopus laevis OX=8355 GN=prdx6.S PE=1 SV=1	936	15	C	UR	1209.88	1486.3	1583.38	1816.64	1551.29	1995.11
tr|Q8AVG6|Q8AVG6_XENLA	dnaja1.L	Dnaja1-prov protein OS=Xenopus laevis OX=8355 GN=dnaja1.L PE=2 SV=1	937	11	C	UR	1749.71	3597.6	1355.85	1106.28	1085.5	1029.34
tr|A0A1L8HMY1|A0A1L8HMY1_XENLA	dnaja1.S	Uncharacterized protein OS=Xenopus laevis OX=8355 GN=dnaja1.S PE=3 SV=1	937	4	C	UR	332.121	398.374	278.344	286.196	335.481	316.334
tr|A0A1L8ETR0|A0A1L8ETR0_XENLA	XELAEV_18043829mg	ElaC homolog protein 2 (Fragment) OS=Xenopus laevis OX=8355 GN=XELAEV_18043829mg PE=1 SV=1	938	3	C	UR	132.653	207.593	201.702	233.973	257.901	295.779
sp|Q9W799|CPSF2_XENLA	cpsf2	Cleavage and polyadenylation specificity factor subunit 2 OS=Xenopus laevis OX=8355 GN=cpsf2 PE=1 SV=1	939	7	C	UR	568.202	556.785	805.692	843.597	505.128	480.693
tr|A0A1L8FWQ8|A0A1L8FWQ8_XENLA	XELAEV_18031198mg	Beta-galactosidase OS=Xenopus laevis OX=8355 GN=XELAEV_18031198mg PE=3 SV=1	940	1	C	UR	86.5757	91.2462	88.3649	79.7209	133.723	120.386
tr|Q9DDV6|Q9DDV6_XENLA	cdc42.L	Cell division control protein 42 homolog OS=Xenopus laevis OX=8355 GN=cdc42.L PE=2 SV=1	941	3	C	UR	664.796	654.814	784.293	881.172	913.436	1215.72
tr|A0A1L8ETE1|A0A1L8ETE1_XENLA	XELAEV_18043674mg	Uncharacterized protein OS=Xenopus laevis OX=8355 GN=XELAEV_18043674mg PE=4 SV=1	941	1	C	UR	97.0947	75.2533	94.9603	103.664	121.944	122.693
tr|A0A1L8EY05|A0A1L8EY05_XENLA	daglb.L	Lipase_3 domain-containing protein OS=Xenopus laevis OX=8355 GN=daglb.L PE=1 SV=1	942	1	C	UR	54.2297	43.9604	38.0417	38.9432	43.5396	42.4074
tr|A0A1L8FIA8|A0A1L8FIA8_XENLA	tial1.L	Uncharacterized protein OS=Xenopus laevis OX=8355 GN=tial1.L PE=1 SV=1	943	3	C	UR	952.639	813.425	730.679	492.824	500.413	463.17
tr|Q90WN0|Q90WN0_XENLA	tia-1	TIA-1 protein (Fragment) OS=Xenopus laevis OX=8355 GN=tia-1 PE=2 SV=1	943	6	C	UR	1663.41	1825.64	1486.43	1157.52	1309.86	1171.05
tr|A0A1L8HDS3|A0A1L8HDS3_XENLA	XELAEV_18011918mg	Clustered mitochondria protein homolog OS=Xenopus laevis OX=8355 GN=XELAEV_18011918mg PE=1 SV=1	944	10	C	UR	1079.68	1110.51	1213	1197.04	1292.64	1349.03
tr|A0A1L8H633|A0A1L8H633_XENLA	XELAEV_18014603mg	Clustered mitochondria protein homolog OS=Xenopus laevis OX=8355 GN=XELAEV_18014603mg PE=1 SV=1	944	7	C	UR	759.675	818.749	906.054	892.578	935.319	996.295
sp|A0JMT0|CA1AB_XENLA	chaf1a-b	Chromatin assembly factor 1 subunit A-B OS=Xenopus laevis OX=8355 GN=chaf1a-b PE=2 SV=2	945	6	C	UR	762.12	812.261	880.376	863.853	935.933	1023.15
tr|Q6GQ58|Q6GQ58_XENLA	anxa3.L	Annexin OS=Xenopus laevis OX=8355 GN=anxa3.L PE=2 SV=1	946	12	C	UR	1881.89	2169.5	2432.51	2633.6	3259.85	3320.73
tr|A0A1L8EWY4|A0A1L8EWY4_XENLA	XELAEV_18044930mg	Aldehyde oxidase 1 OS=Xenopus laevis OX=8355 GN=XELAEV_18044930mg PE=3 SV=1	947	25	C	UR	3219.87	3475.02	3424.53	3624.65	3942.27	4210.11
tr|A0A1L8G7E8|A0A1L8G7E8_XENLA	ralgapa2.L	Rap-GAP domain-containing protein OS=Xenopus laevis OX=8355 GN=ralgapa2.L PE=4 SV=1	948	2	C	UR	178.973	147.884	115.826	115.432	107.124	114.716
tr|A0A1L8HXP4|A0A1L8HXP4_XENLA	cope.L	Coatomer subunit epsilon OS=Xenopus laevis OX=8355 GN=cope.L PE=1 SV=1	949	2	C	UR	266.971	235.143	212.576	232.414	186.286	202.173
tr|A0A1L8GDM1|A0A1L8GDM1_XENLA	cat.2.S	Catalase OS=Xenopus laevis OX=8355 GN=cat.2.S PE=3 SV=1	950	20	C	UR	1766.09	1632.83	5746.85	6245.94	1670.59	1708.33
tr|A0T1H8|A0T1H8_XENLA		Catalase OS=Xenopus laevis OX=8355 PE=2 SV=1	950	5	C	UR	564.804	599.087	2332.58	2828.3	712.522	693.09
sp|Q9DED4|CIRBB_XENLA	cirbp-b	Cold-inducible RNA-binding protein B OS=Xenopus laevis OX=8355 GN=cirbp-b PE=1 SV=1	951	19	C	UR	4271.29	3444.26	3250.23	2527.26	3341.54	2686.03
sp|O93235|CIRBA_XENLA	cirbp-a	Cold-inducible RNA-binding protein A OS=Xenopus laevis OX=8355 GN=cirbp-a PE=1 SV=2	951	14	C	UR	3281.74	1680.36	1344.56	1335.67	1620.8	1485.88
tr|Q7ZYT4|Q7ZYT4_XENLA	nsfl1c.L	NSFL1 cofactor p47 OS=Xenopus laevis OX=8355 GN=nsfl1c.L PE=1 SV=1	952	13	C	UR	1294.91	1275.94	1313.57	1499.76	1562.11	1776.12
tr|A0A1L8ELZ2|A0A1L8ELZ2_XENLA	nsfl1c.S	NSFL1 cofactor p47 OS=Xenopus laevis OX=8355 GN=nsfl1c.S PE=4 SV=1	952	2	C	UR	486.081	515.293	548.178	478.531	602.227	530.336
sp|Q1JQ73|ELV1A_XENLA	elavl1-a	ELAV-like protein 1-A OS=Xenopus laevis OX=8355 GN=elavl1-a PE=1 SV=1	953	3	C	UR	411.376	409.137	451.769	523.678	495.191	588.661
tr|A0A1L8H0R6|A0A1L8H0R6_XENLA	pdia3.L	Protein disulfide-isomerase OS=Xenopus laevis OX=8355 GN=pdia3.L PE=1 SV=1	955	11	C	UR	1300.83	1335.26	1348.06	1989.95	1888.55	2505.64
tr|Q7ZWU3|Q7ZWU3_XENLA	pdia3.S	Protein disulfide-isomerase OS=Xenopus laevis OX=8355 GN=pdia3.S PE=1 SV=1	955	16	C	UR	2225.09	2804.82	2690.02	4070.23	3485.48	4869.27
tr|A0A1L8GKN8|A0A1L8GKN8_XENLA	pdcd2l.L	PDCD2_C domain-containing protein OS=Xenopus laevis OX=8355 GN=pdcd2l.L PE=4 SV=1	957	1	C	UR	86.8033	70.1593	65.8084	70.3415	66.9632	71.1755
sp|P51644|ARF4_XENLA	arf4	ADP-ribosylation factor 4 OS=Xenopus laevis OX=8355 GN=arf4 PE=1 SV=2	958	4	C	UR	329.59	349.894	322.91	353.547	307.855	355.829
tr|Q5M999|Q5M999_XENLA	psmb3.L	Proteasome subunit beta OS=Xenopus laevis OX=8355 GN=psmb3.L PE=1 SV=1	959	7	C	UR	1239.1	1035.27	1078.2	1098.11	1242.88	1179.57
sp|Q7ZX83|HNDLA_XENLA	hnrnpdl-a	Heterogeneous nuclear ribonucleoprotein D-like-A OS=Xenopus laevis OX=8355 GN=hnrnpdl-a PE=2 SV=1	960	12	C	UR	2294.89	2555.04	2967.53	2295.41	2901.85	2892.22
sp|Q6NU14|HNDLB_XENLA	hnrnpdl-b	Heterogeneous nuclear ribonucleoprotein D-like-B OS=Xenopus laevis OX=8355 GN=hnrnpdl-b PE=2 SV=1	960	2	C	UR	86.718	84.2328	104.538	84.4612	103.263	85.3603
tr|Q645K2|Q645K2_XENLA	hnrnpd.L	p37 AUF1 OS=Xenopus laevis OX=8355 GN=hnrnpd.L PE=2 SV=1	960	4	C	UR	971.714	1020.84	810.163	669.498	611.981	602.144
sp|P52170|IMA5_XENLA	kpna1	Importin subunit alpha-5 OS=Xenopus laevis OX=8355 GN=kpna1 PE=1 SV=2	961	8	C	UR	717.083	917.563	1021.88	907.994	822.484	832.273
tr|Q4QR45|Q4QR45_XENLA	kpna7.S	Importin subunit alpha OS=Xenopus laevis OX=8355 GN=kpna7.S PE=2 SV=1	961	1	C	UR	38.29	32.9821	31.5222	36.2097	35.7088	34.7398
sp|P52171|IMA1_XENLA	kpna2	Importin subunit alpha-1 OS=Xenopus laevis OX=8355 GN=kpna2 PE=1 SV=2	961	9	C	UR	753.436	964.725	923.233	1071.07	720.998	865.498
tr|A0A1L8HUP8|A0A1L8HUP8_XENLA	abce1.L	Uncharacterized protein OS=Xenopus laevis OX=8355 GN=abce1.L PE=1 SV=1	962	14	C	UR	2931.82	2497.64	3059.08	2991.06	2641.9	2392.56
tr|Q7ZWZ3|Q7ZWZ3_XENLA	abce1.S	Abce1-prov protein OS=Xenopus laevis OX=8355 GN=abce1.S PE=1 SV=1	962	1	C	UR	334.056	195.239	211.457	232.088	210.57	176.688
sp|Q641C9|CD123_XENLA	cdc123	Cell division cycle protein 123 homolog OS=Xenopus laevis OX=8355 GN=cdc123 PE=2 SV=1	963	1	C	UR	54.454	57.5263	74.1481	50.8122	65.7499	66.1813
tr|Q9I910|Q9I910_XENLA	Xl64phr	6-4 photolyase OS=Xenopus laevis OX=8355 GN=Xl64phr PE=2 SV=1	964	1	C	UR	213.463	192.114	160.205	182.396	194.896	185.054
sp|P54824|DDX6_XENLA	ddx6	ATP-dependent RNA helicase ddx6 OS=Xenopus laevis OX=8355 GN=ddx6 PE=1 SV=2	965	22	C	UR	3109.65	2952.39	2693.97	2776.92	2453.55	2592.85
tr|A0A310UBP8|A0A310UBP8_XENLA	ddx6.S	RNA helicase OS=Xenopus laevis OX=8355 GN=ddx6.S PE=1 SV=1	965	3	C	UR	370.177	351.388	319.056	358.732	330.46	326.397
sp|Q7ZYF2|TCTP_XENLA	tpt1	Translationally-controlled tumor protein homolog OS=Xenopus laevis OX=8355 GN=tpt1 PE=1 SV=1	966	13	C	UR	1897.63	1959.12	1785.01	1729.55	2090.64	2115.78
tr|A0A1L8FKG9|A0A1L8FKG9_XENLA	XELAEV_180350434mg	GCP_C_terminal domain-containing protein (Fragment) OS=Xenopus laevis OX=8355 GN=XELAEV_180350434mg PE=4 SV=1	967	4	C	UR	465.631	814.652	549.398	593.34	297.298	324.475
sp|Q56R14|TRI33_XENLA	trim33	E3 ubiquitin-protein ligase TRIM33 OS=Xenopus laevis OX=8355 GN=trim33 PE=1 SV=1	968	5	C	UR	982.411	1075.75	1744.18	1213.25	530.765	538.135
tr|A0A1L8H6B2|A0A1L8H6B2_XENLA	XELAEV_18014692mg	Uncharacterized protein OS=Xenopus laevis OX=8355 GN=XELAEV_18014692mg PE=1 SV=1	968	2	C	UR	131.181	105.572	177.668	107.202	87.4605	85.1954
tr|Q0D260|Q0D260_XENLA	uchl5.L	Ubiquitin carboxyl-terminal hydrolase OS=Xenopus laevis OX=8355 GN=uchl5.L PE=2 SV=1	970	3	C	UR	526.706	506.323	572.122	678.738	676.961	699.528
tr|A0A1L8GGT8|A0A1L8GGT8_XENLA	uchl5.S	Ubiquitin carboxyl-terminal hydrolase OS=Xenopus laevis OX=8355 GN=uchl5.S PE=1 SV=1	970	13	C	UR	1791.44	1765.07	1901.21	2065.97	2149.67	1982.03
tr|Q6PAA5|Q6PAA5_XENLA	eif4h.S	Eukaryotic translation initiation factor 4H OS=Xenopus laevis OX=8355 GN=eif4h.S PE=1 SV=1	973	4	C	UR	601.893	533.914	544.688	597.557	642.209	690.252
tr|A0A1L8HGA9|A0A1L8HGA9_XENLA	XELAEV_18012802mg	Eukaryotic translation initiation factor 4H OS=Xenopus laevis OX=8355 GN=XELAEV_18012802mg PE=1 SV=1	973	2	C	UR	203.82	178.617	174.369	192.424	241.319	224.512
sp|Q4KLF5|BT3L4_XENLA	btf3l4	Transcription factor BTF3 homolog 4 OS=Xenopus laevis OX=8355 GN=btf3l4 PE=2 SV=1	974	2	C	UR	92.3611	95.869	116.165	135.858	152.036	199.986
sp|Q0VGW6|S12A9_XENLA	slc12a9	Solute carrier family 12 member 9 OS=Xenopus laevis OX=8355 GN=slc12a9 PE=2 SV=1	976	3	C	UR	202.609	176.951	181.383	171.644	254.181	248.198
tr|A0A1L8EVI2|A0A1L8EVI2_XENLA	XELAEV_18044446mg	Uncharacterized protein OS=Xenopus laevis OX=8355 GN=XELAEV_18044446mg PE=4 SV=1	977	31	C	UR	3062.06	2799.01	3398.11	2995.89	3753.64	3530.64
tr|A0A1L8EVP2|A0A1L8EVP2_XENLA	XELAEV_18044447mg	Uncharacterized protein OS=Xenopus laevis OX=8355 GN=XELAEV_18044447mg PE=4 SV=1	977	1	C	UR	42.8958	40.7467	34.4069	48.8777	41.2766	48.7243
tr|A0A1L8FH85|A0A1L8FH85_XENLA	ppp6r1.S	Uncharacterized protein OS=Xenopus laevis OX=8355 GN=ppp6r1.S PE=3 SV=1	978	5	C	UR	450.637	514.46	534.953	510.759	521.826	560.055
sp|Q71U00|SKP1_XENLA	skp1	S-phase kinase-associated protein 1 OS=Xenopus laevis OX=8355 GN=skp1 PE=1 SV=3	979	4	C	UR	836.543	795.639	589.409	570.486	816.557	727.1
sp|Q6GM78|ASGL1_XENLA	asrgl1	Isoaspartyl peptidase/L-asparaginase OS=Xenopus laevis OX=8355 GN=asrgl1 PE=2 SV=1	981	4	C	UR	423.49	395.699	385.322	399.597	471.838	454.694
tr|A0A1L8EZ05|A0A1L8EZ05_XENLA	XELAEV_18045670mg	Ubiquitin-like domain-containing protein OS=Xenopus laevis OX=8355 GN=XELAEV_18045670mg PE=1 SV=1	982	5	C	UR	720.123	623.039	709.967	770.903	878.98	866.501
tr|A0A1L8ERB7|A0A1L8ERB7_XENLA	XELAEV_18047880mg	Ubiquitin-like domain-containing protein OS=Xenopus laevis OX=8355 GN=XELAEV_18047880mg PE=4 SV=1	982	1	C	UR	301.92	170.115	157.579	190.211	268.556	225.131
tr|Q7ZXY3|Q7ZXY3_XENLA	calr.S	Calreticulin OS=Xenopus laevis OX=8355 GN=calr.S PE=2 SV=1	983	6	C	UR	1040.35	1006.78	999.479	1006.33	1312.64	1316.85
tr|Q7ZWU8|Q7ZWU8_XENLA	calr.L	Calreticulin OS=Xenopus laevis OX=8355 GN=calr.L PE=2 SV=1	983	4	C	UR	648.592	705.226	548.146	728.867	832.265	863.919
sp|Q6NUD0|MEP50_XENLA	wdr77	Methylosome protein 50 OS=Xenopus laevis OX=8355 GN=wdr77 PE=1 SV=1	984	16	C	UR	1929.54	2092.69	2262.75	2123.2	2624.8	2638.41
tr|A0A1L8H601|A0A1L8H601_XENLA	XELAEV_18014570mg	WD_REPEATS_REGION domain-containing protein OS=Xenopus laevis OX=8355 GN=XELAEV_18014570mg PE=1 SV=1	984	1	C	UR	114.78	132.996	170.662	154.287	200.64	189.992
tr|A0A1L8EX90|A0A1L8EX90_XENLA	hspd1.L	60 kDa chaperonin OS=Xenopus laevis OX=8355 GN=hspd1.L PE=1 SV=1	985	13	C	UR	1818.59	2168.98	1916.58	2201.51	2299.67	2670.31
tr|Q7ZTN3|Q7ZTN3_XENLA	pon2.L	Arylesterase OS=Xenopus laevis OX=8355 GN=pon2.L PE=2 SV=1	986	9	C	UR	1235.4	1513.74	1441.64	1794.24	1784.64	2065.15
tr|A0A1L8F6Y9|A0A1L8F6Y9_XENLA	zmym3.L	Uncharacterized protein OS=Xenopus laevis OX=8355 GN=zmym3.L PE=1 SV=1	987	7	C	UR	623.078	556.905	843.621	624.824	466.592	462.301
tr|A0A1L8GXT0|A0A1L8GXT0_XENLA	thoc3.L	WD_REPEATS_REGION domain-containing protein OS=Xenopus laevis OX=8355 GN=thoc3.L PE=1 SV=1	988	2	C	UR	244.204	271.751	302.139	279.784	342.578	334.414
tr|A0A1L8FNH6|A0A1L8FNH6_XENLA	XELAEV_18036116mg	Ferritin OS=Xenopus laevis OX=8355 GN=XELAEV_18036116mg PE=3 SV=1	989	1	C	UR	79.7564	120.781	128.951	134.33	139.741	144.154
sp|Q9W603|SP16H_XENLA	supt16h	FACT complex subunit SPT16 OS=Xenopus laevis OX=8355 GN=supt16h PE=1 SV=2	990	17	C	UR	2336.95	2634.55	2777.63	2453.78	2700.86	2652.33
tr|K9ZTJ6|K9ZTJ6_XENLA	nup54.S	Nup54 OS=Xenopus laevis OX=8355 GN=nup54.S PE=1 SV=1	991	3	C	UR	139.138	340.723	290.968	212.274	187.647	243.195
tr|A0A1L8HVE6|A0A1L8HVE6_XENLA	nup54.L	Uncharacterized protein OS=Xenopus laevis OX=8355 GN=nup54.L PE=1 SV=1	991	1	C	UR	61.1526	101.327	85.3402	58.8548	58.6825	78.397
tr|Q6INS4|Q6INS4_XENLA	srpk1.S	MGC81103 protein OS=Xenopus laevis OX=8355 GN=srpk1.S PE=2 SV=1	992	3	C	UR	249.874	269.293	290.384	282.439	276.222	318.748
tr|A0A1L8EZK1|A0A1L8EZK1_XENLA	mon1b.S	Vacuolar fusion protein MON1 homolog OS=Xenopus laevis OX=8355 GN=mon1b.S PE=3 SV=1	993	10	C	UR	2113.95	1773.85	2091.95	1483.08	1115.74	900.621
tr|A0A1L8GPB3|A0A1L8GPB3_XENLA	mon1a.L	Vacuolar fusion protein MON1 homolog OS=Xenopus laevis OX=8355 GN=mon1a.L PE=3 SV=1	993	1	C	UR	59.4366	35.313	33.3585	38.5958	35.4203	42.0145
tr|Q6DFJ1|Q6DFJ1_XENLA	gbe1.L	1,4-alpha-glucan branching enzyme OS=Xenopus laevis OX=8355 GN=gbe1.L PE=2 SV=1	994	10	C	UR	1415.99	1276.38	1205.66	1228.33	1403.86	1383.92
tr|A0A1L8GQ13|A0A1L8GQ13_XENLA	XELAEV_18024048mg	Uncharacterized protein OS=Xenopus laevis OX=8355 GN=XELAEV_18024048mg PE=4 SV=1	995	1	C	UR	57.6861	61.7662	60.6736	70.9753	61.016	73.1602
sp|P70010|NDKA1_XENLA		Nucleoside diphosphate kinase A1 OS=Xenopus laevis OX=8355 PE=2 SV=1	996	14	C	UR	2012.71	2304.49	2334.92	2895.05	2869.46	3325.95
sp|P70011|NDKA2_XENLA		Nucleoside diphosphate kinase A2 OS=Xenopus laevis OX=8355 PE=2 SV=1	996	2	C	UR	344.766	410.699	329.305	427.63	434.217	463.394
tr|Q7ZWR3|Q7ZWR3_XENLA	padi2.S	Protein-arginine deiminase OS=Xenopus laevis OX=8355 GN=padi2.S PE=2 SV=1	998	18	C	UR	2380.97	2524.78	2480.76	2749.74	2977.36	3176.4
sp|Q0IHA2|ELP6_XENLA	elp6	Elongator complex protein 6 OS=Xenopus laevis OX=8355 GN=elp6 PE=2 SV=1	999	1	C	UR	63.1001	50.5873	67.822	61.0128	59.0832	61.4499
tr|A0A1L8FUT5|A0A1L8FUT5_XENLA	XB22065629.L	RRM domain-containing protein OS=Xenopus laevis OX=8355 GN=XB22065629.L PE=4 SV=1	1000	7	C	UR	1765.6	1690.43	930.955	744.859	594.808	571.353
sp|O93377|RBP4A_XENLA	rbbp4-a	Histone-binding protein RBBP4-A OS=Xenopus laevis OX=8355 GN=rbbp4-a PE=1 SV=3	1001	7	C	UR	1243.76	1221.73	1236.34	1152.08	1303.74	1267.71
sp|Q8AVH1|RBBP7_XENLA	rbbp7	Histone-binding protein RBBP7 OS=Xenopus laevis OX=8355 GN=rbbp7 PE=2 SV=1	1001	5	C	UR	538.056	560.426	590.015	599.273	701.359	715.026
sp|Q7ZX64|2ABD_XENLA	ppp2r2d	Serine/threonine-protein phosphatase 2A 55 kDa regulatory subunit B delta isoform OS=Xenopus laevis OX=8355 GN=ppp2r2d PE=1 SV=1	1002	9	C	UR	2653.51	2059.63	1162.54	1122.31	1306.4	1320.43
tr|Q92141|Q92141_XENLA	PP2A	Serine/threonine-protein phosphatase 2A 55 kDa regulatory subunit B (Fragment) OS=Xenopus laevis OX=8355 GN=PP2A PE=2 SV=1	1002	6	C	UR	1324.03	1222.94	620.132	665.828	653.963	677.357
sp|A1L3L9|2ABB_XENLA	ppp2r2b	Serine/threonine-protein phosphatase 2A 55 kDa regulatory subunit B beta isoform OS=Xenopus laevis OX=8355 GN=ppp2r2b PE=2 SV=2	1002	7	C	UR	1635.3	1052.47	523.481	579.233	606.343	600.924
tr|A0A1L8G6W4|A0A1L8G6W4_XENLA	XELAEV_180263551mg	Kinesin-like protein (Fragment) OS=Xenopus laevis OX=8355 GN=XELAEV_180263551mg PE=1 SV=1	1003	4	C	UR	539.767	542.266	598.592	485.992	258.866	235.658
sp|Q91784|KIF4_XENLA	kif4	Chromosome-associated kinesin KIF4 OS=Xenopus laevis OX=8355 GN=kif4 PE=2 SV=1	1003	8	C	UR	625.281	785.77	943.993	729.027	521.952	580.06
tr|A0A1L8GXL6|A0A1L8GXL6_XENLA	XELAEV_18017194mg	Kinesin-like protein OS=Xenopus laevis OX=8355 GN=XELAEV_18017194mg PE=3 SV=1	1003	2	C	UR	145.665	128.089	133.436	137.602	109.457	125.578
tr|A0A1L8HL68|A0A1L8HL68_XENLA	XELAEV_18008996mg	60S ribosomal protein L9 OS=Xenopus laevis OX=8355 GN=XELAEV_18008996mg PE=1 SV=1	1004	8	C	UR	642.225	928.67	1680.56	2242.29	1906.38	2277.82
tr|A0A1L8HTS7|A0A1L8HTS7_XENLA	XELAEV_18005217mg	60S ribosomal protein L9 OS=Xenopus laevis OX=8355 GN=XELAEV_18005217mg PE=3 SV=1	1004	3	C	UR	260.874	340.243	595.348	764.917	697.234	816.541
tr|Q6GPJ6|Q6GPJ6_XENLA	glod4.L	Glyoxalase domain-containing protein 4 OS=Xenopus laevis OX=8355 GN=glod4.L PE=1 SV=1	1005	5	C	UR	629.415	739.753	767.639	815.967	948.776	1118.8
tr|A0A1L8FEB3|A0A1L8FEB3_XENLA	eef1akmt2.S	EEF1A lysine methyltransferase 2 OS=Xenopus laevis OX=8355 GN=eef1akmt2.S PE=1 SV=1	1006	1	C	UR	31.8367	29.6569	36.2065	37.4533	61.5005	43.2099
tr|A0A1L8GLU2|A0A1L8GLU2_XENLA	serbp1.L	HABP4_PAI-RBP1 domain-containing protein OS=Xenopus laevis OX=8355 GN=serbp1.L PE=1 SV=1	1007	3	C	UR	202.791	234.387	271.608	297.201	386.646	359.162
tr|A0A1L8EZV9|A0A1L8EZV9_XENLA	XELAEV_18041119mg	Uncharacterized protein OS=Xenopus laevis OX=8355 GN=XELAEV_18041119mg PE=4 SV=1	1008	1	C	UR	67.8514	90.9835	88.8591	95.6946	127.914	145.911
sp|Q91821|MELK_XENLA	melk	Maternal embryonic leucine zipper kinase OS=Xenopus laevis OX=8355 GN=melk PE=1 SV=2	1009	3	C	UR	393.467	486.806	380.776	385.099	268.575	306.049
tr|A0A1L8H7I7|A0A1L8H7I7_XENLA	acaca.S	Acetyl-CoA carboxylase OS=Xenopus laevis OX=8355 GN=acaca.S PE=4 SV=1	1010	1	C	UR	63.8746	66.8973	39.9253	30.8726	36.7723	37.0909
tr|A0A1L8HZX3|A0A1L8HZX3_XENLA	XELAEV_18007467mg	Acetyl-CoA carboxylase OS=Xenopus laevis OX=8355 GN=XELAEV_18007467mg PE=1 SV=1	1010	6	C	UR	873.697	726.504	412.062	424.006	403.595	415.583
tr|A0A1L8FL00|A0A1L8FL00_XENLA	XELAEV_18035230mg	Condensin-2 complex subunit D3 OS=Xenopus laevis OX=8355 GN=XELAEV_18035230mg PE=1 SV=1	1011	4	C	UR	280.98	368.747	365.364	326.132	283.878	305.478
tr|Q7SZB0|Q7SZB0_XENLA	rpl35a.S	60S ribosomal protein L35a OS=Xenopus laevis OX=8355 GN=rpl35a.S PE=2 SV=1	1012	6	C	UR	1017.85	1505.72	1940.37	2510.14	2350.64	2487.62
tr|A0A1L8H200|A0A1L8H200_XENLA	XB5867546.L	Nucleoplasmin domain-containing protein OS=Xenopus laevis OX=8355 GN=XB5867546.L PE=3 SV=1	1013	2	C	UR	445.031	358.122	321.362	361.329	409.161	372.481
sp|Q7SXA6|FRIH3_XENLA		Ferritin heavy chain, oocyte isoform OS=Xenopus laevis OX=8355 PE=1 SV=1	1014	4	C	UR	649.284	706.842	730.773	864.889	937.965	883.515
sp|Q8AVJ2|L14AB_XENLA	lsm14a-b	Protein LSM14 homolog A-B OS=Xenopus laevis OX=8355 GN=lsm14a-b PE=2 SV=1	1015	8	C	UR	1567.11	1659.57	1309.3	1012.8	923.404	1029.02
sp|A0A8M2|L14AA_XENLA	lsm14a-a	Protein LSM14 homolog A-A OS=Xenopus laevis OX=8355 GN=lsm14a-a PE=1 SV=1	1015	2	C	UR	265.898	380.842	271.284	214.761	178.65	228.569
sp|Q68FI1|L14BA_XENLA	lsm14b-a	Protein LSM14 homolog B-A OS=Xenopus laevis OX=8355 GN=lsm14b-a PE=1 SV=1	1015	10	C	UR	665.803	809.768	781.751	924.342	690.28	977.47
sp|Q498K9|L14BB_XENLA	lsm14b-b	Protein LSM14 homolog B-B OS=Xenopus laevis OX=8355 GN=lsm14b-b PE=1 SV=1	1015	2	C	UR	86.6199	92.1201	104.606	110.808	100.086	120.172
tr|Q08AW3|Q08AW3_XENLA	LOC100158402	LOC100158402 protein (Fragment) OS=Xenopus laevis OX=8355 GN=LOC100158402 PE=2 SV=1	1016	8	C	UR	471.543	536.606	1479.27	1649.86	478.955	512.272
human_gTuNA		cleaved bait sequence	1017	10	C	UR	3045.9	1595.39	461.435	534.022	656.197	714.248
tr|Q7ZYS4|Q7ZYS4_XENLA	pdlim1.S	MGC53685 protein OS=Xenopus laevis OX=8355 GN=pdlim1.S PE=1 SV=1	1018	7	C	UR	719.128	715.624	792.382	841.027	904.535	1059.37
tr|A0A1L8HFA1|A0A1L8HFA1_XENLA	usp9x.L	Ubiquitinyl hydrolase 1 OS=Xenopus laevis OX=8355 GN=usp9x.L PE=3 SV=1	1020	15	C	UR	1577.08	1507.22	1226.72	1226.73	1341.81	1261.38
tr|A0A1L8H6G5|A0A1L8H6G5_XENLA	usp9x.S	Ubiquitinyl hydrolase 1 OS=Xenopus laevis OX=8355 GN=usp9x.S PE=1 SV=1	1020	1	C	UR	52.7384	53.5463	52.0843	42.835	56.7787	52.7559
tr|A0A1L8HLA8|A0A1L8HLA8_XENLA	XELAEV_18009078mg	Sec3-PIP2_bind domain-containing protein OS=Xenopus laevis OX=8355 GN=XELAEV_18009078mg PE=1 SV=1	1021	2	C	UR	528.57	563.143	361.982	408.469	373.244	372.932
sp|Q801P7|ARP3A_XENLA	actr3-a	Actin-related protein 3-A OS=Xenopus laevis OX=8355 GN=actr3-a PE=1 SV=1	1022	13	C	UR	1285.22	1085.28	1104.5	1124.5	1141.43	1159.48
sp|A0A1L8EV45|ARP3B_XENLA	actr3-b	Actin-related protein 3-B OS=Xenopus laevis OX=8355 GN=actr3-b PE=3 SV=1	1022	1	C	UR	85.4092	56.4276	54.7172	47.5454	42.9027	44.3039
tr|A0A1L8EYA0|A0A1L8EYA0_XENLA	ift140.L	Uncharacterized protein OS=Xenopus laevis OX=8355 GN=ift140.L PE=1 SV=1	1024	6	C	UR	667.849	620.856	680.669	657.171	565.115	477.046
tr|A0A1L8GBJ7|A0A1L8GBJ7_XENLA	XELAEV_18028054mg	Rho-associated protein kinase OS=Xenopus laevis OX=8355 GN=XELAEV_18028054mg PE=3 SV=1	1025	15	C	UR	3322.86	2773.63	1693.67	1806.95	1664.56	1624.5
tr|A0A1L8HXF7|A0A1L8HXF7_XENLA	XELAEV_18006565mg	Uncharacterized protein OS=Xenopus laevis OX=8355 GN=XELAEV_18006565mg PE=1 SV=1	1026	7	C	UR	816.716	876.898	912.791	872.884	1056.67	1022.67
tr|Q9I9M9|Q9I9M9_XENLA	slc25a5.L	ADP/ATP translocase OS=Xenopus laevis OX=8355 GN=slc25a5.L PE=1 SV=1	1027	3	C	UR	582.163	606.897	546.129	723.854	621.092	802.893
tr|Q6GQ32|Q6GQ32_XENLA	rnpep.S	MGC80387 protein OS=Xenopus laevis OX=8355 GN=rnpep.S PE=2 SV=1	1028	8	C	UR	1008.31	941.632	1001.16	1166.74	1247.01	1237.71
tr|A0A1L8HEP1|A0A1L8HEP1_XENLA	rnpep.L	Leuk-A4-hydro_C domain-containing protein OS=Xenopus laevis OX=8355 GN=rnpep.L PE=1 SV=1	1028	5	C	UR	512.382	511.081	532.261	606.007	621.772	653.568
tr|A0A1L8GRJ6|A0A1L8GRJ6_XENLA	XELAEV_18020100mg	RNA helicase OS=Xenopus laevis OX=8355 GN=XELAEV_18020100mg PE=4 SV=1	1029	4	C	UR	621.052	632.039	599.344	724.496	615.491	729.674
tr|A0A1L8FKS8|A0A1L8FKS8_XENLA	XELAEV_18035130mg	Oxysterol-binding protein OS=Xenopus laevis OX=8355 GN=XELAEV_18035130mg PE=1 SV=1	1030	6	C	UR	658.429	684.659	682.068	679.68	791.606	882.582
sp|Q6DD71|ERO1A_XENLA	ero1a	ERO1-like protein alpha OS=Xenopus laevis OX=8355 GN=ero1a PE=2 SV=1	1031	4	C	UR	356.743	323.147	325.921	385.185	393.916	439.513
tr|A0A1L8HZU5|A0A1L8HZU5_XENLA	XELAEV_18007311mg	C2 domain-containing protein OS=Xenopus laevis OX=8355 GN=XELAEV_18007311mg PE=3 SV=1	1032	1	C	UR	420.74	316.754	210.135	197.183	89.3138	83.4849
tr|A0A1L8EZZ6|A0A1L8EZZ6_XENLA	XELAEV_18041183mg	Uncharacterized protein OS=Xenopus laevis OX=8355 GN=XELAEV_18041183mg PE=4 SV=1	1033	2	C	UR	234.855	194.427	231.301	196.729	168.743	185.763
sp|Q6NRZ0|RCOR2_XENLA	rcor2	REST corepressor 2 OS=Xenopus laevis OX=8355 GN=rcor2 PE=2 SV=1	1034	5	C	UR	987.684	1115.74	844.212	700.341	547.86	575.089
sp|Q569Z1|EIF3B_XENLA	eif3b	Eukaryotic translation initiation factor 3 subunit B OS=Xenopus laevis OX=8355 GN=eif3b PE=2 SV=1	1035	20	C	UR	4008.83	3422.29	2088.28	2046.96	2436.66	2481.2
tr|A0A1L8EQD3|A0A1L8EQD3_XENLA	eif3b.S	Eukaryotic translation initiation factor 3 subunit B OS=Xenopus laevis OX=8355 GN=eif3b.S PE=3 SV=1	1035	9	C	UR	972.756	872.448	744.446	756.364	867.55	823.871
tr|A0A1L8HAP4|A0A1L8HAP4_XENLA	ift88.S	Uncharacterized protein OS=Xenopus laevis OX=8355 GN=ift88.S PE=1 SV=1	1036	3	C	UR	453.72	727.585	408.824	345.491	343.971	365.162
tr|Q6GR17|Q6GR17_XENLA	pdhb.S	Pyruvate dehydrogenase E1 component subunit beta OS=Xenopus laevis OX=8355 GN=pdhb.S PE=2 SV=1	1037	1	C	UR	175.13	208.904	218.563	275.728	268.367	288.353
tr|Q32N43|Q32N43_XENLA	xlZPA	XlZPA protein (Fragment) OS=Xenopus laevis OX=8355 GN=xlZPA PE=2 SV=1	1038	3	C	UR	208.548	219.198	220.531	245.97	247.221	604.923
sp|Q66J51|EIF3I_XENLA	eif3i	Eukaryotic translation initiation factor 3 subunit I OS=Xenopus laevis OX=8355 GN=eif3i PE=2 SV=1	1039	6	C	UR	867.449	709.182	469.128	439.727	515.872	546.023
tr|A0A1L8H828|A0A1L8H828_XENLA	eif3i.S	Eukaryotic translation initiation factor 3 subunit I OS=Xenopus laevis OX=8355 GN=eif3i.S PE=1 SV=1	1039	2	C	UR	288.483	337.811	248.73	256.496	310.292	337.59
tr|Q7ZYP5|Q7ZYP5_XENLA	utp4.L	MGC52698 protein OS=Xenopus laevis OX=8355 GN=utp4.L PE=1 SV=1	1040	12	C	UR	2504.79	2811.43	1051.73	966.695	978.508	996.715
sp|Q5FWP8|PCID2_XENLA	pcid2	PCI domain-containing protein 2 OS=Xenopus laevis OX=8355 GN=pcid2 PE=2 SV=1	1042	1	C	UR	47.54	41.9838	35.3252	45.0171	44.3667	36.8873
tr|A0A1L8HW36|A0A1L8HW36_XENLA	XELAEV_18006101mg	Uncharacterized protein OS=Xenopus laevis OX=8355 GN=XELAEV_18006101mg PE=1 SV=1	1043	4	C	UR	449.156	408.338	403.207	448.293	459.015	487.558
sp|Q6DE96|IWS1A_XENLA	iws1-a	Protein IWS1 homolog A OS=Xenopus laevis OX=8355 GN=iws1-a PE=2 SV=1	1044	1	C	UR	44.8581	59.2528	65.5113	61.229	59.3047	81.6312
sp|Q91695|HDA1A_XENLA	hdac1-a	Probable histone deacetylase 1-A OS=Xenopus laevis OX=8355 GN=hdac1-a PE=1 SV=1	1045	3	C	UR	331.082	233.418	272.119	295.487	303.033	239.785
sp|O42227|HDA1B_XENLA	hdac1-b	Probable histone deacetylase 1-B OS=Xenopus laevis OX=8355 GN=hdac1-b PE=1 SV=1	1045	1	C	UR	70.0983	45.7237	52.687	52.1696	47.469	43.3484
tr|Q66J55|Q66J55_XENLA	hdac2.S	Histone deacetylase OS=Xenopus laevis OX=8355 GN=hdac2.S PE=2 SV=1	1045	2	C	UR	188.993	122.986	128.859	99.3638	120.831	93.3273
sp|P48597|IF4E_XENLA	eif4e	Eukaryotic translation initiation factor 4E OS=Xenopus laevis OX=8355 GN=eif4e PE=1 SV=1	1046	2	C	UR	141.842	186.004	183.287	181.086	214.541	240.843
tr|Q5HZ86|Q5HZ86_XENLA	eif4e.L	MGC85107 protein OS=Xenopus laevis OX=8355 GN=eif4e.L PE=2 SV=1	1046	1	C	UR	110.457	142.749	169.101	150.065	141.935	166.507
tr|A0A1L8H7L4|A0A1L8H7L4_XENLA	XELAEV_18015146mg	Proteasome subunit beta OS=Xenopus laevis OX=8355 GN=XELAEV_18015146mg PE=3 SV=1	1047	2	C	UR	441.016	423.275	355.235	420.14	364.633	375.599
tr|Q6GQ40|Q6GQ40_XENLA	psmb2.L	Proteasome subunit beta OS=Xenopus laevis OX=8355 GN=psmb2.L PE=1 SV=1	1047	4	C	UR	563.1	466.264	460.355	493.75	491.955	492.866
tr|Q498H2|Q498H2_XENLA		Glutathione transferase OS=Xenopus laevis OX=8355 PE=2 SV=1	1048	4	C	UR	612.69	666.533	578.046	691.511	690.991	627.131
tr|A0A1L8EV64|A0A1L8EV64_XENLA	XELAEV_18044335mg	Poly [ADP-ribose] polymerase OS=Xenopus laevis OX=8355 GN=XELAEV_18044335mg PE=1 SV=1	1049	4	C	UR	550.85	539.409	418.2	423.998	331.493	327.088
tr|A9JS50|A9JS50_XENLA	LOC398175	Peptidylprolyl isomerase OS=Xenopus laevis OX=8355 GN=LOC398175 PE=1 SV=1	1050	9	C	UR	1738.54	1719.1	1435.6	1636.45	2000.2	2208.14
tr|Q7ZWS8|Q7ZWS8_XENLA	tagln2.S	Transgelin OS=Xenopus laevis OX=8355 GN=tagln2.S PE=1 SV=1	1051	8	C	UR	908.072	1058.73	1078.81	1342.35	1339.5	1729.7
tr|A0A1L8FCQ5|A0A1L8FCQ5_XENLA	tagln2.L	Transgelin OS=Xenopus laevis OX=8355 GN=tagln2.L PE=3 SV=1	1051	3	C	UR	243.887	441.35	517.589	656.714	725.91	853.939
tr|A0A1L8FI63|A0A1L8FI63_XENLA	nhlrc2.L	Thioredoxin domain-containing protein OS=Xenopus laevis OX=8355 GN=nhlrc2.L PE=1 SV=1	1052	1	C	UR	101.042	177.529	108.576	112.145	144.724	131.038
sp|P50533|SMC2_XENLA	smc2	Structural maintenance of chromosomes protein 2 OS=Xenopus laevis OX=8355 GN=smc2 PE=1 SV=1	1054	18	C	UR	2621.52	2773.65	2595.72	2529.53	2087.86	1999.83
tr|A0A1L8HTM3|A0A1L8HTM3_XENLA	wdr19.L	WD_REPEATS_REGION domain-containing protein OS=Xenopus laevis OX=8355 GN=wdr19.L PE=1 SV=1	1055	5	C	UR	493.705	381.515	427.15	413.61	364.023	294.047
tr|Q7ZWL4|Q7ZWL4_XENLA	dnaja2.L	MGC53478 protein OS=Xenopus laevis OX=8355 GN=dnaja2.L PE=2 SV=1	1056	13	C	UR	2235.75	3157.77	1230.97	966.986	968.867	926.4
tr|A0A1L8GF57|A0A1L8GF57_XENLA	XELAEV_18025031mg	Uncharacterized protein OS=Xenopus laevis OX=8355 GN=XELAEV_18025031mg PE=1 SV=1	1056	2	C	UR	171.385	285.688	111.204	91.4621	97.637	86.4705
sp|Q5PPU8|NTAQ1_XENLA	ntaq1	Protein N-terminal glutamine amidohydrolase OS=Xenopus laevis OX=8355 GN=ntaq1 PE=2 SV=1	1057	4	C	UR	567.269	366.011	306.993	388.594	408.164	366.595
tr|Q3KQ92|Q3KQ92_XENLA	psmb6.S	Proteasome subunit beta OS=Xenopus laevis OX=8355 GN=psmb6.S PE=2 SV=1	1058	13	C	UR	1377.52	1228.91	1328.67	1403.22	1617.65	1537.69
tr|Q3KPV9|Q3KPV9_XENLA	psmb6.L	Proteasome subunit beta OS=Xenopus laevis OX=8355 GN=psmb6.L PE=1 SV=1	1058	2	C	UR	275.93	205.987	231.082	170.42	258.85	231.285
tr|A0A1L8HD92|A0A1L8HD92_XENLA	wdr81.L	Uncharacterized protein OS=Xenopus laevis OX=8355 GN=wdr81.L PE=4 SV=1	1059	30	C	UR	7023.69	6586.95	1556.98	1560.78	2032.59	1930.84
tr|Q7ZY33|Q7ZY33_XENLA	RAB18	RAB18 protein (Fragment) OS=Xenopus laevis OX=8355 GN=RAB18 PE=2 SV=1	1060	1	C	UR	90.3117	83.3934	95.2243	90.7761	84.5634	112.188
sp|P12965|MOS_XENLA	mos	Serine/threonine-protein kinase mos OS=Xenopus laevis OX=8355 GN=mos PE=2 SV=1	1061	1	C	UR	348.819	371.959	483.468	434.948	145.166	151.504
sp|A0A1L8EXB5|AR1AB_XENLA	arpc1a-b	Actin-related protein 2/3 complex subunit 1A-B OS=Xenopus laevis OX=8355 GN=arpc1a-b PE=3 SV=1	1062	6	C	UR	658.694	640.895	822.242	627.752	866.372	763.214
sp|Q8AVT9|AR1AA_XENLA	arpc1a-a	Actin-related protein 2/3 complex subunit 1A-A OS=Xenopus laevis OX=8355 GN=arpc1a-a PE=1 SV=1	1062	1	C	UR	202.491	225.293	307.903	194.845	322.72	234.6
tr|A0A1L8HU69|A0A1L8HU69_XENLA	XELAEV_18005359mg	Uncharacterized protein OS=Xenopus laevis OX=8355 GN=XELAEV_18005359mg PE=1 SV=1	1063	2	C	UR	276.711	273.654	410.463	425.678	251.617	295.737
tr|Q6NTP7|Q6NTP7_XENLA	LOC398139	Aconitate hydratase, mitochondrial OS=Xenopus laevis OX=8355 GN=LOC398139 PE=1 SV=1	1064	23	C	UR	2975.97	3020.4	2889.99	3096.69	3467.6	3843.93
tr|Q6DKB9|Q6DKB9_XENLA	aco2.S	Aconitate hydratase, mitochondrial OS=Xenopus laevis OX=8355 GN=aco2.S PE=2 SV=1	1064	4	C	UR	309.824	326.285	280.093	331.634	340.852	382.999
sp|Q7ZWV9|MAP1_XENLA	metap1	Methionine aminopeptidase 1 OS=Xenopus laevis OX=8355 GN=metap1 PE=2 SV=2	1065	12	C	UR	1570.01	1349.01	1294.52	1117.97	1524.77	1378.93
tr|Q7SYZ8|Q7SYZ8_XENLA	metap1.S	Methionine aminopeptidase OS=Xenopus laevis OX=8355 GN=metap1.S PE=2 SV=1	1065	3	C	UR	247.606	200.619	198.311	201.405	216.15	214.301
tr|A0A1L8EW91|A0A1L8EW91_XENLA	XELAEV_18044672mg	E3 ubiquitin-protein ligase OS=Xenopus laevis OX=8355 GN=XELAEV_18044672mg PE=1 SV=1	1066	15	C	UR	2002.68	1612.48	1404.51	1413.35	1910.48	1595.47
tr|A0A1L8HTT4|A0A1L8HTT4_XENLA	XELAEV_18005307mg	Uncharacterized protein OS=Xenopus laevis OX=8355 GN=XELAEV_18005307mg PE=4 SV=1	1067	3	C	UR	381.544	350.858	235.406	223.698	248.596	209.873
tr|A0A1L8EV76|A0A1L8EV76_XENLA	dtx3l.L	E3 ubiquitin-protein ligase OS=Xenopus laevis OX=8355 GN=dtx3l.L PE=1 SV=1	1068	3	C	UR	496.47	558.31	375.217	323.495	273.747	268.833
tr|A0A1L8EM66|A0A1L8EM66_XENLA	XELAEV_18046471mg	UBX domain-containing protein OS=Xenopus laevis OX=8355 GN=XELAEV_18046471mg PE=1 SV=1	1069	6	C	UR	826.515	791.553	928.83	1017.72	1083.95	1153.38
tr|Q6PCH4|Q6PCH4_XENLA	g6pd.L	Glucose-6-phosphate 1-dehydrogenase OS=Xenopus laevis OX=8355 GN=g6pd.L PE=2 SV=2	1070	8	C	UR	1239.08	1210.45	1350.99	1595.57	1489.51	1618.54
tr|A0A1L8F1J8|A0A1L8F1J8_XENLA	XELAEV_18041692mg	Glucose-6-phosphate 1-dehydrogenase OS=Xenopus laevis OX=8355 GN=XELAEV_18041692mg PE=1 SV=1	1070	7	C	UR	640.341	565.044	585.211	626.459	628.183	644.997
sp|P63282|UBC9_XENLA	ube2i	SUMO-conjugating enzyme UBC9 OS=Xenopus laevis OX=8355 GN=ube2i PE=1 SV=1	1071	2	C	UR	468.575	576.891	574.212	666.658	552.847	523.446
sp|P43690|DRG1_XENLA	drg1	Developmentally-regulated GTP-binding protein 1 OS=Xenopus laevis OX=8355 GN=drg1 PE=1 SV=1	1072	5	C	UR	650.657	619.913	519.982	530.245	498.581	612.025
tr|Q5PPZ0|Q5PPZ0_XENLA	cbr1.1.S	LOC496039 protein OS=Xenopus laevis OX=8355 GN=cbr1.1.S PE=1 SV=1	1073	13	C	UR	1590.37	1623.38	2375.76	2678.49	3154.06	2922.29
tr|A0A1L8HCP8|A0A1L8HCP8_XENLA	cbr1.3.L	Uncharacterized protein OS=Xenopus laevis OX=8355 GN=cbr1.3.L PE=3 SV=1	1073	4	C	UR	311.161	357.402	365.193	439.03	479.241	524.223
tr|A0A1L8HCF0|A0A1L8HCF0_XENLA	cbr1.1.L	Uncharacterized protein OS=Xenopus laevis OX=8355 GN=cbr1.1.L PE=3 SV=1	1073	5	C	UR	519.558	690.608	700.026	852.546	890.371	1018.45
tr|Q6DFM0|Q6DFM0_XENLA	smarca5.S	ISWI protein OS=Xenopus laevis OX=8355 GN=smarca5.S PE=1 SV=1	1074	8	C	UR	1133.6	1176.7	1017.21	965.014	791.605	745.006
sp|Q5HZM6|ELP3_XENLA	elp3	Elongator complex protein 3 OS=Xenopus laevis OX=8355 GN=elp3 PE=2 SV=1	1075	4	C	UR	373.296	369.299	526.216	465.587	363.852	327.279
tr|A0A1L8GMU7|A0A1L8GMU7_XENLA	snx7.L	PX domain-containing protein OS=Xenopus laevis OX=8355 GN=snx7.L PE=1 SV=1	1078	3	C	UR	313.794	286.741	240.219	291.307	291.785	295.162
tr|Q6NUA2|Q6NUA2_XENLA	wars1.L	T1-TrpRS OS=Xenopus laevis OX=8355 GN=wars1.L PE=2 SV=1	1079	5	C	UR	534.163	579.812	625.569	621.91	701.321	728.662
sp|P15126|RL5B_XENLA	rpl5-b	60S ribosomal protein L5-B OS=Xenopus laevis OX=8355 GN=rpl5-b PE=2 SV=2	1080	7	C	UR	689.355	770.735	1183.49	962.634	1600.09	1167.3
tr|Q8AVI7|Q8AVI7_XENLA	rpl5.L	Rpl5-b protein OS=Xenopus laevis OX=8355 GN=rpl5.L PE=2 SV=1	1080	4	C	UR	565.574	828.026	1230.4	1375.84	1799.83	1670.65
tr|Q8AVX2|Q8AVX2_XENLA	rpl5.S	Rpl5-a protein OS=Xenopus laevis OX=8355 GN=rpl5.S PE=2 SV=1	1080	4	C	UR	225.681	272.186	366.166	330.619	428.856	345.424
sp|Q6DE87|CHK1_XENLA	chek1	Serine/threonine-protein kinase Chk1 OS=Xenopus laevis OX=8355 GN=chek1 PE=1 SV=2	1082	9	C	UR	919.64	845.592	1660.22	1515.45	1864.58	1601.17
tr|A0A1L8FFS1|A0A1L8FFS1_XENLA	chek1.S	CHK1 checkpoint homolog OS=Xenopus laevis OX=8355 GN=chek1.S PE=1 SV=1	1082	1	C	UR	72.9362	68.9825	77.5094	80.5328	104.888	99.6092
tr|A0A1L8FL95|A0A1L8FL95_XENLA	chek1.L	CHK1 checkpoint homolog OS=Xenopus laevis OX=8355 GN=chek1.L PE=1 SV=1	1082	1	C	UR	126.959	115.259	196.815	219.252	236.291	202.904
sp|Q91819|AURAB_XENLA	aurka-b	Aurora kinase A-B OS=Xenopus laevis OX=8355 GN=aurka-b PE=2 SV=3	1083	5	C	UR	762.373	825.831	791.055	817.305	567.367	549.458
sp|Q91820|AURAA_XENLA	aurka-a	Aurora kinase A-A OS=Xenopus laevis OX=8355 GN=aurka-a PE=1 SV=1	1083	2	C	UR	224.17	253.921	291.604	276.528	200.733	204.401
tr|A0A1L8FGT4|A0A1L8FGT4_XENLA	gsk3a.S	[Tau protein] kinase OS=Xenopus laevis OX=8355 GN=gsk3a.S PE=3 SV=1	1084	9	C	UR	2374.95	1834.87	1337.31	1078.27	619.034	523.042
tr|A0A1L8H5Q6|A0A1L8H5Q6_XENLA	XELAEV_18014462mg	Glycogen synthase kinase-3 beta OS=Xenopus laevis OX=8355 GN=XELAEV_18014462mg PE=3 SV=1	1084	1	C	UR	62.8218	51.1929	53.2178	52.6325	35.0841	25.3192
tr|A0A1L8FGK7|A0A1L8FGK7_XENLA	ube2m.S	UBC core domain-containing protein OS=Xenopus laevis OX=8355 GN=ube2m.S PE=3 SV=1	1085	1	C	UR	205.415	174.224	185.031	199.196	209.97	261.414
sp|Q6DCZ9|UBC12_XENLA	ube2m	NEDD8-conjugating enzyme Ubc12 OS=Xenopus laevis OX=8355 GN=ube2m PE=2 SV=1	1085	3	C	UR	408.068	480.891	437.829	531.945	526.263	677.07
tr|A0A1L8G5F0|A0A1L8G5F0_XENLA	wdr35.S	WD repeat-containing protein 35 OS=Xenopus laevis OX=8355 GN=wdr35.S PE=1 SV=1	1086	8	C	UR	787.009	798.961	1076.8	968.059	861.236	760.07
sp|P39017|RS6_XENLA	rps6	40S ribosomal protein S6 OS=Xenopus laevis OX=8355 GN=rps6 PE=2 SV=1	1087	7	C	UR	819.744	1056.78	1299.73	1764.01	1568.19	1696.46
tr|Q7ZYU0|Q7ZYU0_XENLA	rps6.L	40S ribosomal protein S6 OS=Xenopus laevis OX=8355 GN=rps6.L PE=1 SV=1	1087	2	C	UR	136.997	117.061	150.254	194.461	191.546	214.89
tr|A0A1L8HQT2|A0A1L8HQT2_XENLA	trafd1.S	Uncharacterized protein OS=Xenopus laevis OX=8355 GN=trafd1.S PE=4 SV=1	1088	4	C	UR	858.338	963.417	491.96	473.021	351.068	374.633
tr|A0A1L8I1A6|A0A1L8I1A6_XENLA	trafd1.L	Uncharacterized protein OS=Xenopus laevis OX=8355 GN=trafd1.L PE=4 SV=1	1088	9	C	UR	1687.73	1777.08	915.089	823.296	625.155	653.282
tr|A0A1L8HWA9|A0A1L8HWA9_XENLA	wrn.L	DNA helicase OS=Xenopus laevis OX=8355 GN=wrn.L PE=1 SV=1	1089	14	C	UR	2409.39	4130.83	1928.26	1880.75	1596.81	1559.52
tr|Q8AVN8|Q8AVN8_XENLA	cdc37.S	Hsp90 chaperone protein kinase-targeting subunit OS=Xenopus laevis OX=8355 GN=cdc37.S PE=1 SV=1	1090	8	C	UR	928.6	1163.13	1290.43	1444.73	1608.62	1549.05
tr|A0A1L8FYG2|A0A1L8FYG2_XENLA	cep192.L	ASH domain-containing protein OS=Xenopus laevis OX=8355 GN=cep192.L PE=1 SV=1	1091	8	C	UR	629.718	956.027	675.592	546.492	535.938	558.677
tr|Q6AZL7|Q6AZL7_XENLA	rps26.L	40S ribosomal protein S26 OS=Xenopus laevis OX=8355 GN=rps26.L PE=2 SV=1	1092	1	C	UR	110.243	102.54	116.554	91.0915	128.984	97.843
sp|Q32NS4|ARI1_XENLA	arih1	E3 ubiquitin-protein ligase arih1 OS=Xenopus laevis OX=8355 GN=arih1 PE=2 SV=1	1094	5	C	UR	955.433	777.928	738.093	692.606	873.483	811.742
sp|Q5J6M8|RTN3A_XENLA	rtn3-a	Reticulon-3-A OS=Xenopus laevis OX=8355 GN=rtn3-a PE=2 SV=2	1095	2	C	UR	145.31	189.315	206.21	303.376	272.417	352.093
tr|A0A1L8G7S0|A0A1L8G7S0_XENLA	ttc27.L	Tetratricopeptide repeat protein 27 OS=Xenopus laevis OX=8355 GN=ttc27.L PE=1 SV=1	1096	10	C	UR	950.765	918.356	945.167	1073.84	1031.87	1038.94
sp|Q6P9I7|SMC6_XENLA	smc6	Structural maintenance of chromosomes protein 6 OS=Xenopus laevis OX=8355 GN=smc6 PE=2 SV=1	1097	5	C	UR	843.09	810.909	1146.91	1002.63	805.862	650.959
tr|A0A1L8FEM1|A0A1L8FEM1_XENLA	oga.S	Uncharacterized protein OS=Xenopus laevis OX=8355 GN=oga.S PE=1 SV=1	1098	3	C	UR	283.797	334.97	332.302	383.481	403.114	440.824
tr|A0A1L8HZZ7|A0A1L8HZZ7_XENLA	dao.L	DAO domain-containing protein OS=Xenopus laevis OX=8355 GN=dao.L PE=1 SV=1	1099	4	C	UR	434.854	455.829	1375.89	1549.31	321.955	325.468
tr|A2RV57|A2RV57_XENLA	atp2a2.S	Calcium-transporting ATPase OS=Xenopus laevis OX=8355 GN=atp2a2.S PE=2 SV=1	1100	5	C	UR	554.3	555.54	579.015	704.848	648.801	772.331
tr|Q5HZL6|Q5HZL6_XENLA	LOC496363	DNA primase large subunit (Fragment) OS=Xenopus laevis OX=8355 GN=LOC496363 PE=2 SV=1	1101	6	C	UR	707.228	757.038	780.951	915.312	631.736	726.491
tr|A0A1L8GLI9|A0A1L8GLI9_XENLA	XELAEV_18022826mg	Protein VAC14 homolog OS=Xenopus laevis OX=8355 GN=XELAEV_18022826mg PE=1 SV=1	1102	13	C	UR	2445.1	2420.4	1908.81	1828.79	1316.03	1311.09
tr|Q6NTK4|Q6NTK4_XENLA	MGC83233	26S proteasome non-ATPase regulatory subunit 2 OS=Xenopus laevis OX=8355 GN=MGC83233 PE=2 SV=1	1103	4	C	UR	553.35	444.561	538.023	434.647	633.159	475.042
tr|A0A1L8GA35|A0A1L8GA35_XENLA	XELAEV_18027426mg	26S proteasome non-ATPase regulatory subunit 2 OS=Xenopus laevis OX=8355 GN=XELAEV_18027426mg PE=1 SV=1	1103	32	C	UR	5191.48	5185.2	5854.67	5660.58	6336.34	5892.42
tr|Q7ZWU4|Q7ZWU4_XENLA	cacybp.S	Calcyclin-binding protein OS=Xenopus laevis OX=8355 GN=cacybp.S PE=2 SV=1	1104	1	C	UR	95.6093	107.665	83.9609	72.6798	87.2997	93.0604
sp|Q5XGL8|NPLB_XENLA	npl-b	N-acetylneuraminate lyase B OS=Xenopus laevis OX=8355 GN=npl-b PE=2 SV=1	1105	2	C	UR	137.944	152.345	144.912	192.787	178.132	200.798
tr|A0A1L8G6X4|A0A1L8G6X4_XENLA	XELAEV_180263553mg	Kinesin motor domain-containing protein (Fragment) OS=Xenopus laevis OX=8355 GN=XELAEV_180263553mg PE=3 SV=1	1106	2	C	UR	608.613	534.022	493.391	377.356	207.079	198.31
tr|A0A1L8HYH7|A0A1L8HYH7_XENLA	hnrnpk.L	Heterogeneous nuclear ribonucleoprotein K OS=Xenopus laevis OX=8355 GN=hnrnpk.L PE=1 SV=1	1107	9	C	UR	1181.25	1182.59	1009.34	974.953	1021.77	1147.6
tr|Q7ZXK8|Q7ZXK8_XENLA	hnrnpk.S	Heterogeneous nuclear ribonucleoprotein K OS=Xenopus laevis OX=8355 GN=hnrnpk.S PE=2 SV=1	1107	1	C	UR	103.891	68.371	71.8304	51.6794	50.4733	60.5997
sp|Q9YHY6|CND1_XENLA	ncapd2	Condensin complex subunit 1 OS=Xenopus laevis OX=8355 GN=ncapd2 PE=1 SV=1	1108	2	C	UR	212.059	206.77	207.317	192.26	204.912	226.292
tr|Q90X16|Q90X16_XENLA	anxa4.L	Annexin OS=Xenopus laevis OX=8355 GN=anxa4.L PE=1 SV=1	1109	6	C	UR	715.739	968.839	851.704	1056.75	1058.8	1061.26
sp|Q6GPB6|KCMF1_XENLA	kcmf1	E3 ubiquitin-protein ligase KCMF1 OS=Xenopus laevis OX=8355 GN=kcmf1 PE=2 SV=1	1110	2	C	UR	373.667	341.901	366.883	321.654	335.999	323.463
tr|Q5EAV1|Q5EAV1_XENLA	katnbl1.L	MGC85168 protein OS=Xenopus laevis OX=8355 GN=katnbl1.L PE=2 SV=1	1111	1	C	UR	224.136	164.193	71.0626	78.8493	88.2203	89.109
sp|Q8AVF4|MLECB_XENLA	mlec-b	Malectin-B OS=Xenopus laevis OX=8355 GN=mlec-b PE=2 SV=2	1112	3	C	UR	499.283	490.327	489.548	561.613	590.978	701.637
tr|A0A1L8GE34|A0A1L8GE34_XENLA	edc4.S	Enhancer of mRNA-decapping protein 4 OS=Xenopus laevis OX=8355 GN=edc4.S PE=3 SV=1	1113	7	C	UR	694.242	906.274	1092.32	1019.35	984.1	985.851
sp|Q7ZXT3|EDC4_XENLA	edc4	Enhancer of mRNA-decapping protein 4 OS=Xenopus laevis OX=8355 GN=edc4 PE=2 SV=1	1113	7	C	UR	840.519	1046.69	1072.95	1084.52	982.207	918.97
sp|Q6PAB3|MDHC_XENLA	mdh1	Malate dehydrogenase, cytoplasmic OS=Xenopus laevis OX=8355 GN=mdh1 PE=2 SV=1	1114	17	C	UR	3318.37	3887.53	4968.47	5666.16	5065.75	5674.95
tr|A0A1L8G769|A0A1L8G769_XENLA	mdh1.L	Malate dehydrogenase OS=Xenopus laevis OX=8355 GN=mdh1.L PE=3 SV=1	1114	7	C	UR	1525.44	2122.41	2533.52	3273.02	2614.51	3325.34
tr|Q05AW6|Q05AW6_XENLA	rtcb.L	RNA-splicing ligase RtcB homolog OS=Xenopus laevis OX=8355 GN=rtcb.L PE=2 SV=1	1116	26	C	UR	4550.15	3735.03	4026.17	3170.52	3319.5	2833.61
tr|A0A1L8GQR4|A0A1L8GQR4_XENLA	rtcb.S	RNA-splicing ligase RtcB homolog OS=Xenopus laevis OX=8355 GN=rtcb.S PE=1 SV=1	1116	12	C	UR	2061.89	1823.45	1641.72	1483.42	1363.65	1263.16
tr|A0A1L8FZ29|A0A1L8FZ29_XENLA	XELAEV_18032055mg	Uncharacterized protein OS=Xenopus laevis OX=8355 GN=XELAEV_18032055mg PE=1 SV=1	1117	1	C	UR	57.1975	70.6987	58.3124	73.2549	84.6754	91.5858
tr|A0A1L8FAK5|A0A1L8FAK5_XENLA	XELAEV_18039911mg	Non-specific serine/threonine protein kinase OS=Xenopus laevis OX=8355 GN=XELAEV_18039911mg PE=1 SV=1	1118	1	C	UR	410.046	432.574	318.173	321.768	319.346	281.534
tr|A0A1L8FS49|A0A1L8FS49_XENLA	txndc5.S	Uncharacterized protein OS=Xenopus laevis OX=8355 GN=txndc5.S PE=1 SV=1	1120	4	C	UR	807.497	570.356	466.499	585.135	564.014	700.561
tr|Q7ZX44|Q7ZX44_XENLA	txndc5.L	Txndc5-prov protein OS=Xenopus laevis OX=8355 GN=txndc5.L PE=2 SV=1	1120	5	C	UR	236.629	273.343	220.279	266.547	255.81	301.735
tr|A0A1L8FA08|A0A1L8FA08_XENLA	ckb.L	Creatine kinase OS=Xenopus laevis OX=8355 GN=ckb.L PE=1 SV=1	1121	32	C	UR	4152.77	4097.95	4035.82	4524.41	4417.56	5215.01
tr|A0A1L8EZY5|A0A1L8EZY5_XENLA	XELAEV_18041172mg	Creatine kinase OS=Xenopus laevis OX=8355 GN=XELAEV_18041172mg PE=1 SV=1	1121	6	C	UR	847.924	833.691	807.805	884.91	890.427	1019.73
tr|A0A1L8G9H1|A0A1L8G9H1_XENLA	syncrip.L	Uncharacterized protein OS=Xenopus laevis OX=8355 GN=syncrip.L PE=4 SV=1	1122	4	C	UR	293.722	343.122	446.971	404.048	483.073	516.177
tr|A0A1L8GJG6|A0A1L8GJG6_XENLA	XELAEV_18022120mg	Calcium-activated neutral proteinase 1 OS=Xenopus laevis OX=8355 GN=XELAEV_18022120mg PE=1 SV=1	1123	6	C	UR	749.335	771.442	817.723	796.941	777.631	1387.01
tr|Q6AX93|Q6AX93_XENLA	capn1.S	Calcium-activated neutral proteinase 1 OS=Xenopus laevis OX=8355 GN=capn1.S PE=2 SV=1	1123	12	C	UR	1121.02	1083.82	1112.54	1136.81	1103.22	1196.63
tr|A0A1L8GER1|A0A1L8GER1_XENLA	psmd7.S	MPN domain-containing protein OS=Xenopus laevis OX=8355 GN=psmd7.S PE=3 SV=1	1124	7	C	UR	889.018	878.482	1028.75	1174.8	1154.09	1201.58
tr|A0A1L8GYM3|A0A1L8GYM3_XENLA	XELAEV_18017584mg	TPR_REGION domain-containing protein OS=Xenopus laevis OX=8355 GN=XELAEV_18017584mg PE=1 SV=1	1125	3	C	UR	272.39	302.435	406.129	351.349	307.725	253.183
sp|Q5HZN1|KD3AB_XENLA	kdm3a-b	Lysine-specific demethylase 3A-B OS=Xenopus laevis OX=8355 GN=kdm3a-b PE=2 SV=1	1126	6	C	UR	847.914	1393.81	1057.66	780.413	511.822	526.131
sp|Q6IRB8|KD3AA_XENLA	kdm3a-a	Lysine-specific demethylase 3A-A OS=Xenopus laevis OX=8355 GN=kdm3a-a PE=2 SV=1	1126	2	C	UR	141.883	300.202	227.104	142.91	78.7038	104.493
tr|A0A1L8GMF3|A0A1L8GMF3_XENLA	nrdc.L	Uncharacterized protein OS=Xenopus laevis OX=8355 GN=nrdc.L PE=3 SV=1	1127	2	C	UR	224.081	268.031	337.267	339.58	386.15	369.435
tr|A0A1L8GFX3|A0A1L8GFX3_XENLA	nrdc.S	Uncharacterized protein OS=Xenopus laevis OX=8355 GN=nrdc.S PE=1 SV=1	1127	1	C	UR	90.1089	117.618	120.827	109.692	144.79	158.838
tr|A0A1L8GJG1|A0A1L8GJG1_XENLA	pola2.L	DNA polymerase alpha subunit B OS=Xenopus laevis OX=8355 GN=pola2.L PE=1 SV=1	1128	5	C	UR	756.293	796.455	837.568	798.291	793.434	881.694
tr|Q76LD2|Q76LD2_XENLA	rfc4.L	RFC2 protein OS=Xenopus laevis OX=8355 GN=rfc4.L PE=1 SV=1	1129	2	C	UR	78.5953	83.7637	107.712	94.1559	84.1685	95.5511
tr|A0A1L8H974|A0A1L8H974_XENLA	XELAEV_18015607mg	ATP-dependent (S)-NAD(P)H-hydrate dehydratase OS=Xenopus laevis OX=8355 GN=XELAEV_18015607mg PE=1 SV=1	1130	1	C	UR	141.278	133.062	147.819	170.17	165.923	237.754
tr|A0A1L8H261|A0A1L8H261_XENLA	ikbkb.L	I-kappa-B kinase OS=Xenopus laevis OX=8355 GN=ikbkb.L PE=4 SV=1	1131	1	C	UR	72.9345	62.3213	99.8475	116.475	82.3403	70.7043
tr|O73613|O73613_XENLA	map3k7.L	Mitogen-activated protein kinase kinase kinase 7 OS=Xenopus laevis OX=8355 GN=map3k7.L PE=2 SV=1	1132	9	C	UR	1814.42	1727.67	544.81	502.376	449.887	466.563
tr|A0A1L8FD53|A0A1L8FD53_XENLA	XELAEV_18040826mg	40S ribosomal protein S27 OS=Xenopus laevis OX=8355 GN=XELAEV_18040826mg PE=3 SV=1	1133	3	C	UR	196.584	260.285	417.239	442.085	517.717	556.477
tr|A0A1L8GZY5|A0A1L8GZY5_XENLA	rps27l.L	40S ribosomal protein S27 OS=Xenopus laevis OX=8355 GN=rps27l.L PE=3 SV=1	1133	4	C	UR	427.251	465.242	631.576	684.636	709.404	845.234
tr|A0A1L8GTE8|A0A1L8GTE8_XENLA	XELAEV_18020804mg	40S ribosomal protein S27 (Fragment) OS=Xenopus laevis OX=8355 GN=XELAEV_18020804mg PE=3 SV=1	1133	1	C	UR	53.5999	45.2524	76.6545	111.385	66.3405	94.065
tr|A0A1L8GWQ5|A0A1L8GWQ5_XENLA	XELAEV_18016912mg	WD_REPEATS_REGION domain-containing protein OS=Xenopus laevis OX=8355 GN=XELAEV_18016912mg PE=1 SV=1	1134	17	C	UR	1703.39	3204.8	3325.5	2859.96	2988.09	3329.98
tr|A0A1L8GB86|A0A1L8GB86_XENLA	XELAEV_18027838mg	Uncharacterized protein OS=Xenopus laevis OX=8355 GN=XELAEV_18027838mg PE=4 SV=1	1135	1	C	UR	101.527	242.598	131.249	69.5957	101.754	373.571
tr|Q7ZYU4|Q7ZYU4_XENLA	XELAEV_18037805mg	40S ribosomal protein S9 OS=Xenopus laevis OX=8355 GN=XELAEV_18037805mg PE=1 SV=1	1136	3	C	UR	464.716	356.404	414.441	466.969	546.21	562.185
tr|Q6GNX6|Q6GNX6_XENLA	rps9.S	40S ribosomal protein S9 OS=Xenopus laevis OX=8355 GN=rps9.S PE=2 SV=1	1136	14	C	UR	1689.82	2100.93	3415.27	3430.86	3885.31	3863.07
sp|Q7ZXV3|ARP2B_XENLA	actr2-b	Actin-related protein 2-B OS=Xenopus laevis OX=8355 GN=actr2-b PE=2 SV=1	1137	12	C	UR	1287.72	1196.78	1360.38	1116.38	1247.01	1155.94
tr|A0A1L8GDI3|A0A1L8GDI3_XENLA	fbxo3.S	Uncharacterized protein OS=Xenopus laevis OX=8355 GN=fbxo3.S PE=4 SV=1	1138	4	C	UR	1119.21	961.788	566.049	435.564	796.583	528.54
tr|A0A1L8FG92|A0A1L8FG92_XENLA	MGC115716.S	KRAB domain-containing protein OS=Xenopus laevis OX=8355 GN=MGC115716.S PE=4 SV=1	1140	1	C	UR	330.063	505.018	943.03	899.546	877.597	776.043
tr|A0A1L8G7R5|A0A1L8G7R5_XENLA	hnrnpu.L	Uncharacterized protein OS=Xenopus laevis OX=8355 GN=hnrnpu.L PE=1 SV=1	1141	1	C	UR	109.731	99.2236	146.123	125.466	157.087	156.594
tr|A0A1L8G218|A0A1L8G218_XENLA	XELAEV_18028958mg	Uncharacterized protein OS=Xenopus laevis OX=8355 GN=XELAEV_18028958mg PE=4 SV=1	1142	3	C	UR	514.814	713.075	786.218	605.962	820.59	784.55
sp|Q6GPR5|TPC13_XENLA	trappc13	Trafficking protein particle complex subunit 13 OS=Xenopus laevis OX=8355 GN=trappc13 PE=2 SV=2	1143	1	C	UR	130.628	111.222	95.7059	105.443	64.1401	92.3124
tr|A0A1L8GYM9|A0A1L8GYM9_XENLA	tbc1d15.L	Rab-GAP TBC domain-containing protein OS=Xenopus laevis OX=8355 GN=tbc1d15.L PE=1 SV=1	1144	1	C	UR	28.9388	45.495	54.6945	42.9615	45.96	54.2549
tr|Q52KX1|Q52KX1_XENLA	arl10b.L	MGC114718 protein OS=Xenopus laevis OX=8355 GN=arl10b.L PE=2 SV=1	1145	1	C	UR	129.638	132.624	115.919	150.316	137.635	159.01
tr|Q8UW98|Q8UW98_XENLA	lgals9c.S	Galectin OS=Xenopus laevis OX=8355 GN=lgals9c.S PE=2 SV=1	1146	1	C	UR	74.4962	78.9647	92.0094	91.7074	99.9987	115.97
tr|A0A1L8HQN1|A0A1L8HQN1_XENLA	vps33a.S	Uncharacterized protein OS=Xenopus laevis OX=8355 GN=vps33a.S PE=3 SV=1	1147	7	C	UR	1981.2	1743.38	1665.77	2019.05	1190.76	1020.67
tr|A0A1L8G354|A0A1L8G354_XENLA	ttk.S	Protein kinase domain-containing protein OS=Xenopus laevis OX=8355 GN=ttk.S PE=1 SV=1	1148	1	C	UR	172.274	381.744	239.255	153.849	129.564	142.682
sp|A1A5K6|TBC24_XENLA	tbc1d24	TBC1 domain family member 24 OS=Xenopus laevis OX=8355 GN=tbc1d24 PE=2 SV=1	1149	16	C	UR	2416.04	2144.19	4591.31	4084.85	1915.07	1906.59
tr|Q6AX83|Q6AX83_XENLA	lars1.L	Leucyl-tRNA synthetase OS=Xenopus laevis OX=8355 GN=lars1.L PE=1 SV=1	1151	18	C	UR	2125.05	2250.81	2315.47	2394.43	2816.18	2467.56
tr|A8WH35|A8WH35_XENLA	naa15.S	NMDA receptor regulated 1-like OS=Xenopus laevis OX=8355 GN=naa15.S PE=2 SV=1	1152	17	C	UR	2692.48	3030.28	3224.01	3601.3	4296.96	3839.62
tr|A0A1L8HUJ1|A0A1L8HUJ1_XENLA	naa16.L	Uncharacterized protein OS=Xenopus laevis OX=8355 GN=naa16.L PE=1 SV=1	1152	2	C	UR	288.286	327.373	317.874	334.062	371.166	407.854
tr|A0A310U4L3|A0A310U4L3_XENLA	XELAEV_18004265mg	ANK_REP_REGION domain-containing protein OS=Xenopus laevis OX=8355 GN=XELAEV_18004265mg PE=1 SV=1	1153	2	C	UR	302.212	215.18	118.958	146.27	157.167	161.504
tr|Q505N1|Q505N1_XENLA	anp32e.S	MGC114736 protein OS=Xenopus laevis OX=8355 GN=anp32e.S PE=2 SV=1	1154	1	C	UR	12.0543	19.4213	22.1751	43.5914	54.1225	64.6467
sp|Q7ZY40|AN32E_XENLA	anp32e	Acidic leucine-rich nuclear phosphoprotein 32 family member E OS=Xenopus laevis OX=8355 GN=anp32e PE=1 SV=1	1154	1	C	UR	79.0201	75.0644	66.6764	78.2448	79.0848	85.3562
tr|A0A1L8GI47|A0A1L8GI47_XENLA	uevld.L	UEV domain-containing protein OS=Xenopus laevis OX=8355 GN=uevld.L PE=1 SV=1	1155	4	C	UR	867.656	647.225	360.519	352.839	313.893	326.091
sp|Q6DD27|TAOK3_XENLA	taok3	Serine/threonine-protein kinase TAO3 OS=Xenopus laevis OX=8355 GN=taok3 PE=2 SV=1	1156	7	C	UR	1474.65	1433.75	1116.24	900.704	807.979	742.949
tr|Q4KLD2|Q4KLD2_XENLA	dcps.L	m7GpppX diphosphatase OS=Xenopus laevis OX=8355 GN=dcps.L PE=2 SV=1	1157	5	C	UR	550.014	528.232	494.831	640.179	674.537	732.475
tr|Q7ZY99|Q7ZY99_XENLA	LOC398472	Annexin (Fragment) OS=Xenopus laevis OX=8355 GN=LOC398472 PE=2 SV=1	1158	11	C	UR	1083.09	1179.75	1100	1537.26	1436.06	1626.75
tr|Q6GR36|Q6GR36_XENLA	anxa5.S	Annexin OS=Xenopus laevis OX=8355 GN=anxa5.S PE=1 SV=1	1158	1	C	UR	55.4406	79.7105	65.516	98.7477	83.5261	84.2432
tr|Q641H0|Q641H0_XENLA	anxa11.S	Annexin OS=Xenopus laevis OX=8355 GN=anxa11.S PE=2 SV=1	1158	2	C	UR	395.595	390.84	388.063	501.331	438.609	504.845
tr|A0A310TRB4|A0A310TRB4_XENLA	fuca1.S	Alpha-L-fucosidase OS=Xenopus laevis OX=8355 GN=fuca1.S PE=1 SV=1	1159	9	C	UR	879.807	825.353	790.369	748.407	952.181	960.364
tr|A9UMN2|A9UMN2_XENLA	fuca1.L	Alpha-L-fucosidase OS=Xenopus laevis OX=8355 GN=fuca1.L PE=2 SV=1	1159	2	C	UR	340.19	287.551	266.069	250.69	260.79	312.726
tr|A0A1L8G6Z4|A0A1L8G6Z4_XENLA	XELAEV_18026559mg	Acyl-coenzyme A oxidase OS=Xenopus laevis OX=8355 GN=XELAEV_18026559mg PE=1 SV=1	1160	1	C	UR	35.8192	24.6784	53.2594	70.9041	33.5267	27.4454
tr|A0A1L8GL56|A0A1L8GL56_XENLA	XELAEV_18022695mg	Uncharacterized protein OS=Xenopus laevis OX=8355 GN=XELAEV_18022695mg PE=1 SV=1	1161	8	C	UR	1349.43	1290.1	979.414	935.845	1135.18	1130.08
tr|A0A1L8HZM9|A0A1L8HZM9_XENLA	dnaja4.1.L	Uncharacterized protein OS=Xenopus laevis OX=8355 GN=dnaja4.1.L PE=3 SV=1	1162	11	C	UR	840.501	1117.59	821.472	701.66	608.957	685.741
tr|A0A1L8G8E9|A0A1L8G8E9_XENLA	XELAEV_18026827mg	Uncharacterized protein OS=Xenopus laevis OX=8355 GN=XELAEV_18026827mg PE=1 SV=1	1163	4	C	UR	601.06	616.672	388.875	332.314	348.545	348.157
tr|A0A1L8G2E5|A0A1L8G2E5_XENLA	XELAEV_18029066mg	Uncharacterized protein OS=Xenopus laevis OX=8355 GN=XELAEV_18029066mg PE=4 SV=1	1163	2	C	UR	146.622	114.461	72.4786	73.8658	73.1313	89.2879
tr|Q6AZR6|Q6AZR6_XENLA	xrcc6.L	ATP-dependent DNA helicase 2 subunit 1 OS=Xenopus laevis OX=8355 GN=xrcc6.L PE=2 SV=1	1164	5	C	UR	259.275	295.649	280.261	316.629	327.342	344.882
tr|A0A1L8GTJ9|A0A1L8GTJ9_XENLA	XELAEV_18020836mg	3-hydroxy-3-methylglutarate-CoA lyase OS=Xenopus laevis OX=8355 GN=XELAEV_18020836mg PE=1 SV=1	1165	1	C	UR	267.605	283.487	227.76	249.261	299.287	270.462
tr|Q91673|Q91673_XENLA	zp4.S	Lzpb-a protein OS=Xenopus laevis OX=8355 GN=zp4.S PE=2 SV=1	1167	12	C	UR	870.358	754.813	799.656	772.348	828.828	3109.33
tr|Q05AT7|Q05AT7_XENLA	zp4.L	MGC154888 protein OS=Xenopus laevis OX=8355 GN=zp4.L PE=2 SV=1	1167	3	C	UR	432.21	391.692	440.128	397.095	491.203	1270.08
tr|A0A1L8HH08|A0A1L8HH08_XENLA	cul4a.L	CULLIN_2 domain-containing protein OS=Xenopus laevis OX=8355 GN=cul4a.L PE=1 SV=1	1168	5	C	UR	756.32	659.882	523.926	581.531	597.395	525.839
tr|A0A1L8FPX3|A0A1L8FPX3_XENLA	XELAEV_18032592mg	Uncharacterized protein (Fragment) OS=Xenopus laevis OX=8355 GN=XELAEV_18032592mg PE=1 SV=1	1169	14	C	UR	1582.01	1932.4	1923.59	2062.68	1824.82	1969.18
tr|A0A1L8FJM6|A0A1L8FJM6_XENLA	herc4.L	HECT domain-containing protein OS=Xenopus laevis OX=8355 GN=herc4.L PE=4 SV=1	1170	13	C	UR	1853.41	1737.9	1202.37	1113.79	1241.89	1172.31
sp|P25183|RCC1_XENLA	rcc1	Regulator of chromosome condensation OS=Xenopus laevis OX=8355 GN=rcc1 PE=2 SV=1	1171	3	C	UR	258.337	284.464	294.202	271.922	279.502	328.593
tr|A0A1L8FWJ0|A0A1L8FWJ0_XENLA	dnajc13.L	J domain-containing protein OS=Xenopus laevis OX=8355 GN=dnajc13.L PE=1 SV=1	1172	5	C	UR	315.761	286.644	315.895	317.176	294.519	299.089
tr|A0A1L8FRK8|A0A1L8FRK8_XENLA	dnajc13.S	J domain-containing protein OS=Xenopus laevis OX=8355 GN=dnajc13.S PE=4 SV=1	1172	1	C	UR	60.034	55.8454	72.5775	73.765	56.0266	66.5842
tr|Q7T0T8|Q7T0T8_XENLA	XELAEV_18010093mg	MGC68999 protein OS=Xenopus laevis OX=8355 GN=XELAEV_18010093mg PE=2 SV=1	1173	3	C	UR	678.025	744.841	412.511	387.736	314.079	370.513
tr|A0A1L8H3R0|A0A1L8H3R0_XENLA	wrap53.L	WD_REPEATS_REGION domain-containing protein OS=Xenopus laevis OX=8355 GN=wrap53.L PE=1 SV=1	1174	2	C	UR	261.626	291.374	323.662	329.189	312.759	330.753
tr|A0A1L8GT63|A0A1L8GT63_XENLA	tjp1.S	Uncharacterized protein OS=Xenopus laevis OX=8355 GN=tjp1.S PE=1 SV=1	1175	4	C	UR	627.881	602.497	342.806	337.24	343.266	373.197
tr|A0A1L8H090|A0A1L8H090_XENLA	XELAEV_18018146mg	Uncharacterized protein OS=Xenopus laevis OX=8355 GN=XELAEV_18018146mg PE=1 SV=1	1175	1	C	UR	65.9036	64.685	28.6232	28.0218	38.0177	33.8464
tr|Q9IA93|Q9IA93_XENLA	rngtt.S	mRNA-capping enzyme OS=Xenopus laevis OX=8355 GN=rngtt.S PE=2 SV=1	1176	1	C	UR	80.7391	74.7961	85.7781	89.1799	87.0303	87.4286
tr|Q7T0Q4|Q7T0Q4_XENLA	pitpnb.L	Pitpn-prov protein OS=Xenopus laevis OX=8355 GN=pitpnb.L PE=2 SV=1	1177	2	C	UR	265.394	300.005	277.95	314.849	380.209	388.671
sp|Q0IH88|ARC2A_XENLA	arpc2-a	Actin-related protein 2/3 complex subunit 2-A OS=Xenopus laevis OX=8355 GN=arpc2-a PE=2 SV=1	1178	4	C	UR	827.077	835.302	723.789	690.803	750.516	711.355
tr|A0A1L8EW34|A0A1L8EW34_XENLA	XELAEV_18044625mg	Uncharacterized protein OS=Xenopus laevis OX=8355 GN=XELAEV_18044625mg PE=1 SV=1	1179	5	C	UR	786.833	759.987	638.864	646.85	852.624	795.8
tr|A0A1L8GT87|A0A1L8GT87_XENLA	XELAEV_18020741mg	40S ribosomal protein S17 (Fragment) OS=Xenopus laevis OX=8355 GN=XELAEV_18020741mg PE=3 SV=1	1180	2	C	UR	101.533	106.775	151.449	212.699	165.845	240.38
sp|Q05116|MP2K1_XENLA	map2k1	Dual specificity mitogen-activated protein kinase kinase 1 OS=Xenopus laevis OX=8355 GN=map2k1 PE=1 SV=2	1181	14	C	UR	3286.4	2960.13	2628.49	2755.68	2861.09	3050.23
tr|A0A1L8GSC6|A0A1L8GSC6_XENLA	map2k1.S	Protein kinase domain-containing protein OS=Xenopus laevis OX=8355 GN=map2k1.S PE=1 SV=1	1181	2	C	UR	137.499	107.823	97.1456	106.423	124.208	124.542
sp|Q9W704|RIPA_XENLA	rpain-a	RPA-interacting protein A OS=Xenopus laevis OX=8355 GN=rpain-a PE=1 SV=1	1182	2	C	UR	228.918	237.559	240.702	220.156	229.507	273.406
tr|A0A1L8HTL5|A0A1L8HTL5_XENLA	pgm2l1.L	Uncharacterized protein OS=Xenopus laevis OX=8355 GN=pgm2l1.L PE=1 SV=1	1183	5	C	UR	732.142	978.156	878.092	974.069	1069.39	1145.01
tr|Q6NU20|Q6NU20_XENLA	rab9a.L	Rab9a-a protein OS=Xenopus laevis OX=8355 GN=rab9a.L PE=1 SV=1	1184	1	C	UR	53.9711	55.8974	44.8956	59.067	51.2081	55.7605
tr|Q6PA99|Q6PA99_XENLA	rab7a.L	MGC68523 protein OS=Xenopus laevis OX=8355 GN=rab7a.L PE=2 SV=1	1186	5	C	UR	833.373	841.709	766.092	778.075	713.62	817.331
tr|A1A5J1|A1A5J1_XENLA	LOC398610	LOC398610 protein OS=Xenopus laevis OX=8355 GN=LOC398610 PE=1 SV=1	1187	3	C	UR	662.594	583.423	379.407	453.385	419.144	458.177
tr|A0A1L8EYA2|A0A1L8EYA2_XENLA	amdhd2.L	N-acetylglucosamine-6-phosphate deacetylase OS=Xenopus laevis OX=8355 GN=amdhd2.L PE=3 SV=1	1188	2	C	UR	168.338	189.526	193.114	209.038	259.482	281.209
tr|A0A1L8H748|A0A1L8H748_XENLA	sars1.S	Seryl-tRNA synthetase OS=Xenopus laevis OX=8355 GN=sars1.S PE=1 SV=1	1189	9	C	UR	937.823	1027.27	991.254	1189.95	1278.14	1325.55
tr|Q7ZY49|Q7ZY49_XENLA	sars1.L	Seryl-tRNA synthetase OS=Xenopus laevis OX=8355 GN=sars1.L PE=1 SV=1	1189	2	C	UR	250.692	244.922	239.732	291.504	331.942	345.145
tr|A0A1L8HT72|A0A1L8HT72_XENLA	acox3.L	Acyl-coenzyme A oxidase OS=Xenopus laevis OX=8355 GN=acox3.L PE=1 SV=1	1190	6	C	UR	371.063	348.915	909.7	933.26	362.068	357.311
tr|Q7ZTL2|Q7ZTL2_XENLA	Psmd12	Psmd12 protein (Fragment) OS=Xenopus laevis OX=8355 GN=Psmd12 PE=2 SV=1	1191	14	C	UR	2400.18	2449.39	2454.72	2602.63	3053.73	2428.66
tr|A0A1L8EUZ9|A0A1L8EUZ9_XENLA	XELAEV_18044260mg	PCI domain-containing protein OS=Xenopus laevis OX=8355 GN=XELAEV_18044260mg PE=3 SV=1	1191	5	C	UR	824.682	731.899	769.292	796.071	952.099	683.525
tr|Q6I803|Q6I803_XENLA	s100a11.L	Calcium-binding protein p26olf OS=Xenopus laevis OX=8355 GN=s100a11.L PE=1 SV=1	1192	1	C	UR	82.5334	71.1454	72.3129	96.1632	78.0582	96.5269
tr|A0A1L8G7U7|A0A1L8G7U7_XENLA	igf2r.L	Uncharacterized protein OS=Xenopus laevis OX=8355 GN=igf2r.L PE=4 SV=1	1193	1	C	UR	40.7342	44.5973	60.1067	45.1406	88.3812	82.5
tr|Q52KN6|Q52KN6_XENLA	LOC779032	Exocyst complex component Sec8 (Fragment) OS=Xenopus laevis OX=8355 GN=LOC779032 PE=2 SV=1	1195	4	C	UR	390.509	498.662	384.306	386.114	354.276	365.297
tr|A0A1L8G7R0|A0A1L8G7R0_XENLA	XELAEV_18026753mg	Sulfotransferase OS=Xenopus laevis OX=8355 GN=XELAEV_18026753mg PE=1 SV=1	1197	1	C	UR	32.3336	38.1699	40.8801	44.3336	54.0171	52.5782
sp|Q6P6Z0|DDB1_XENLA	ddb1	DNA damage-binding protein 1 OS=Xenopus laevis OX=8355 GN=ddb1 PE=2 SV=1	1198	34	C	UR	5595.27	4866.67	4475.74	3720.02	4434.71	3810.05
tr|Q6DDW1|Q6DDW1_XENLA	txnl1.S	MGC81675 protein OS=Xenopus laevis OX=8355 GN=txnl1.S PE=1 SV=1	1199	12	C	UR	1274.17	1418.67	1510.66	1394.74	1882.9	1844.37
sp|Q6GN16|PI4KB_XENLA	pi4kb	Phosphatidylinositol 4-kinase beta OS=Xenopus laevis OX=8355 GN=pi4kb PE=2 SV=1	1200	6	C	UR	815.853	899.447	579.907	522.713	533.796	555.158
tr|A0A1L8F577|A0A1L8F577_XENLA	XELAEV_18042987mg	PIK helical domain-containing protein OS=Xenopus laevis OX=8355 GN=XELAEV_18042987mg PE=3 SV=1	1200	1	C	UR	108.505	92.7957	72.33	79.2171	69.2479	76.5431
tr|A0A1L8F9T4|A0A1L8F9T4_XENLA	nemf.L	Uncharacterized protein OS=Xenopus laevis OX=8355 GN=nemf.L PE=1 SV=1	1202	4	C	UR	427.406	406.863	430.573	446.707	437.678	453.735
tr|Q8AVN1|Q8AVN1_XENLA	traf7.S	Rfwd1-prov protein OS=Xenopus laevis OX=8355 GN=traf7.S PE=2 SV=1	1203	1	C	UR	114.635	132.96	61.1778	52.3478	65.4009	69.8057
tr|A0A1L8HFL6|A0A1L8HFL6_XENLA	txlna.L	Uncharacterized protein OS=Xenopus laevis OX=8355 GN=txlna.L PE=3 SV=1	1204	3	C	UR	455.124	469.174	477.726	483.214	525.109	504.733
tr|A0A1L8HW32|A0A1L8HW32_XENLA	hnrnpm.L	Uncharacterized protein OS=Xenopus laevis OX=8355 GN=hnrnpm.L PE=1 SV=1	1205	7	C	UR	1017.78	1111.47	761.439	524.266	511.971	555.11
tr|A0A1L8GZD8|A0A1L8GZD8_XENLA	upf2.L	Uncharacterized protein OS=Xenopus laevis OX=8355 GN=upf2.L PE=4 SV=1	1206	1	C	UR	76.9803	113.074	82.856	76.6982	48.2898	54.3605
tr|Q3B8M1|Q3B8M1_XENLA	fkbp3.L	Peptidylprolyl isomerase OS=Xenopus laevis OX=8355 GN=fkbp3.L PE=1 SV=1	1207	4	C	UR	461.489	572.901	574.536	635.216	766.663	749.653
tr|A0A1L8EZL1|A0A1L8EZL1_XENLA	XELAEV_18040989mg	Uncharacterized protein OS=Xenopus laevis OX=8355 GN=XELAEV_18040989mg PE=1 SV=1	1209	1	C	UR	39.2301	30.1934	32.1024	49.3774	39.5559	42.2178
tr|Q4V7H4|Q4V7H4_XENLA	LOC733268	LOC733268 protein (Fragment) OS=Xenopus laevis OX=8355 GN=LOC733268 PE=2 SV=1	1210	11	C	UR	1647.86	1980.53	2096.47	1707.34	1786.58	1814.64
sp|Q6NU27|I4E3B_XENLA	eif4e3-b	Eukaryotic translation initiation factor 4E type 3-B OS=Xenopus laevis OX=8355 GN=eif4e3-b PE=2 SV=1	1211	3	C	UR	860.478	602.462	343.099	363.302	219.525	253.675
sp|Q6GR08|I4E3A_XENLA	eif4e3-a	Eukaryotic translation initiation factor 4E type 3-A OS=Xenopus laevis OX=8355 GN=eif4e3-a PE=2 SV=1	1211	1	C	UR	58.3979	45.1351	37.1263	44.9737	39.6456	40.2555
tr|A0A1L8HYZ3|A0A1L8HYZ3_XENLA	XELAEV_18006924mg	Uncharacterized protein OS=Xenopus laevis OX=8355 GN=XELAEV_18006924mg PE=3 SV=1	1212	3	C	UR	306.309	313.349	217.289	196.751	216.231	227.801
tr|Q7ZX62|Q7ZX62_XENLA	spsb1.S	Ns:zf-e326 protein OS=Xenopus laevis OX=8355 GN=spsb1.S PE=2 SV=1	1213	1	C	UR	35.6947	42.6114	39.3015	31.517	36.6841	47.6383
sp|Q6DFL5|THO5A_XENLA	thoc5-a	THO complex subunit 5 homolog A OS=Xenopus laevis OX=8355 GN=thoc5-a PE=1 SV=1	1215	1	C	UR	165.892	139.062	121.457	124.778	115.361	134.936
tr|A0A1L8I0N8|A0A1L8I0N8_XENLA	klhl22.L	Kelch-like protein 22 OS=Xenopus laevis OX=8355 GN=klhl22.L PE=4 SV=1	1216	1	C	UR	46.6989	48.9704	42.5871	34.8627	32.4306	42.8482
tr|A0A1L8GIK6|A0A1L8GIK6_XENLA	XELAEV_18021810mg	Fe2OG dioxygenase domain-containing protein OS=Xenopus laevis OX=8355 GN=XELAEV_18021810mg PE=1 SV=1	1217	9	C	UR	2279.91	1769.08	1278.84	1296.93	802.04	912.955
tr|A0A1L8H7T6|A0A1L8H7T6_XENLA	khdrbs1.S	KH domain-containing protein OS=Xenopus laevis OX=8355 GN=khdrbs1.S PE=1 SV=1	1218	3	C	UR	682.184	813.52	429.723	337.22	313.016	286.041
tr|A0A1L8EWS5|A0A1L8EWS5_XENLA	XELAEV_18044893mg	WD_REPEATS_REGION domain-containing protein OS=Xenopus laevis OX=8355 GN=XELAEV_18044893mg PE=1 SV=1	1219	9	C	UR	1197.13	988.458	1450.38	1464.74	968.595	962.486
tr|Q498I8|Q498I8_XENLA	cops7b.S	MGC114836 protein OS=Xenopus laevis OX=8355 GN=cops7b.S PE=1 SV=1	1220	1	C	UR	110.158	109.665	101.828	104.2	112.505	136.678
tr|A0A1L8GPM1|A0A1L8GPM1_XENLA	ift122.L	Intraflagellar transport protein 122 homolog OS=Xenopus laevis OX=8355 GN=ift122.L PE=1 SV=1	1221	2	C	UR	301.783	253.769	254.739	234.621	250.013	248.485
tr|A0A1L8HU84|A0A1L8HU84_XENLA	hpf1.L	Uncharacterized protein OS=Xenopus laevis OX=8355 GN=hpf1.L PE=1 SV=1	1222	4	C	UR	326.609	276.695	267.799	261.334	273.865	274.417
tr|A0A1L8F1U7|A0A1L8F1U7_XENLA	XELAEV_18041757mg	Non-specific serine/threonine protein kinase OS=Xenopus laevis OX=8355 GN=XELAEV_18041757mg PE=4 SV=1	1223	2	C	UR	97.1834	97.4259	126.786	139.536	128.405	134.928
tr|A0A1L8GQX6|A0A1L8GQX6_XENLA	XELAEV_18019880mg	Non-specific serine/threonine protein kinase OS=Xenopus laevis OX=8355 GN=XELAEV_18019880mg PE=1 SV=1	1223	2	C	UR	127.422	196.294	210.232	177.194	234.13	245.536
sp|Q7ZWS1|DUS3L_XENLA	dus3l	tRNA-dihydrouridine(47) synthase [NAD(P)(+)]-like OS=Xenopus laevis OX=8355 GN=dus3l PE=2 SV=1	1224	1	C	UR	138.57	220.432	223.294	234.703	173.096	188.312
sp|Q6NU56|MET14_XENLA	mettl14	N6-adenosine-methyltransferase non-catalytic subunit OS=Xenopus laevis OX=8355 GN=mettl14 PE=2 SV=1	1226	1	C	UR	327.297	355.339	299.658	261.367	227.604	211.318
tr|Q7ZYM5|Q7ZYM5_XENLA	sdcbp.S	Sdcbp protein OS=Xenopus laevis OX=8355 GN=sdcbp.S PE=2 SV=1	1227	4	C	UR	258.666	297.118	317.659	399.261	326.228	470.345
sp|P87378|CRK_XENLA	crk	Adapter molecule crk OS=Xenopus laevis OX=8355 GN=crk PE=2 SV=1	1228	2	C	UR	129.969	137.171	120.479	120.737	124.492	133.463
tr|A0A1L8FAA4|A0A1L8FAA4_XENLA	XELAEV_18039823mg	Uncharacterized protein OS=Xenopus laevis OX=8355 GN=XELAEV_18039823mg PE=1 SV=1	1229	1	C	UR	103.449	100.882	84.8364	87.6705	65.9428	85.173
tr|A0A1L8EZZ0|A0A1L8EZZ0_XENLA	XELAEV_18041117mg	Uncharacterized protein OS=Xenopus laevis OX=8355 GN=XELAEV_18041117mg PE=1 SV=1	1229	3	C	UR	237.016	188.423	140.563	134.693	156.221	141.326
sp|Q76BK2|MIF_XENLA	mif	Macrophage migration inhibitory factor OS=Xenopus laevis OX=8355 GN=mif PE=1 SV=1	1230	9	C	UR	1200.89	1726.27	2293.21	2633.47	3184.5	3504.25
tr|A0A1L8G9D7|A0A1L8G9D7_XENLA	fig4.L	SAC domain-containing protein OS=Xenopus laevis OX=8355 GN=fig4.L PE=1 SV=1	1231	4	C	UR	669.364	496.523	411.823	376.49	352.503	352.912
tr|A0A310TK71|A0A310TK71_XENLA	XELAEV_18000698mg	Peptidase S59 domain-containing protein OS=Xenopus laevis OX=8355 GN=XELAEV_18000698mg PE=1 SV=1	1232	1	C	UR	113.812	101.083	114.782	112.282	108.894	116.01
sp|Q6NRT3|SMU1_XENLA	smu1	WD40 repeat-containing protein SMU1 OS=Xenopus laevis OX=8355 GN=smu1 PE=2 SV=1	1233	10	C	UR	2387.31	1735.12	908.457	829.996	846.718	683.966
tr|A1L1H7|A1L1H7_XENLA	supt5h.S	Transcription elongation factor SPT5 OS=Xenopus laevis OX=8355 GN=supt5h.S PE=2 SV=1	1234	1	C	UR	76.0929	75.5975	63.8324	64.8725	54.3277	63.6963
tr|A0A1L8GS13|A0A1L8GS13_XENLA	ciao1.S	Probable cytosolic iron-sulfur protein assembly protein CIAO1 OS=Xenopus laevis OX=8355 GN=ciao1.S PE=1 SV=1	1235	1	C	UR	232.423	234.922	237.443	213.056	253.361	296.706
sp|Q66IY8|I2BLA_XENLA	irf2bpl-a	Interferon regulatory factor 2-binding protein-like A OS=Xenopus laevis OX=8355 GN=irf2bpl-a PE=2 SV=1	1236	2	C	UR	163.026	131.144	126.276	115.204	117.813	115.22
tr|Q7ZWZ9|Q7ZWZ9_XENLA	dnm1l.L	Dynamin-1-like protein OS=Xenopus laevis OX=8355 GN=dnm1l.L PE=2 SV=1	1237	3	C	UR	454.208	579.134	425.489	460.819	431.026	470.909
tr|Q5XGR3|Q5XGR3_XENLA	ppib.S	Peptidyl-prolyl cis-trans isomerase OS=Xenopus laevis OX=8355 GN=ppib.S PE=2 SV=1	1238	6	C	UR	1126.04	1086.63	1064.98	1510.04	1581.12	1753.8
tr|Q7SZ26|Q7SZ26_XENLA	ppib.L	Peptidyl-prolyl cis-trans isomerase OS=Xenopus laevis OX=8355 GN=ppib.L PE=1 SV=1	1238	6	C	UR	1183.78	1295.63	1360.22	1721	1905.66	2075.75
tr|Q3KPU5|Q3KPU5_XENLA	LOC733374	Peptidyl-prolyl cis-trans isomerase (Fragment) OS=Xenopus laevis OX=8355 GN=LOC733374 PE=2 SV=1	1238	1	C	UR	146.009	109.625	106.441	114.066	121.848	151.681
tr|P79929|P79929_XENLA	ranbp1.L	LOC397932 protein OS=Xenopus laevis OX=8355 GN=ranbp1.L PE=1 SV=2	1239	6	C	UR	899.457	823.141	916.121	992.871	1181.59	1278.97
tr|A0A1L8G1I6|A0A1L8G1I6_XENLA	rtn4.S	Reticulon OS=Xenopus laevis OX=8355 GN=rtn4.S PE=1 SV=1	1240	8	C	UR	1035.31	1277.42	1413.98	1504.08	1824.28	2006.72
tr|A0A1L8G5R6|A0A1L8G5R6_XENLA	rtn4.L	Reticulon OS=Xenopus laevis OX=8355 GN=rtn4.L PE=4 SV=1	1240	2	C	UR	145.743	129.401	140.749	140.332	169.345	177.174
sp|Q6INU3|PDLI7_XENLA	pdlim7	PDZ and LIM domain protein 7 OS=Xenopus laevis OX=8355 GN=pdlim7 PE=2 SV=1	1241	3	C	UR	282.707	299.988	234.75	248.784	217.396	247.391
tr|Q6NRX1|Q6NRX1_XENLA	ovos2.L	MGC81160 protein OS=Xenopus laevis OX=8355 GN=ovos2.L PE=2 SV=1	1242	6	C	UR	669.182	656.274	665.792	650.197	756.25	759.168
tr|A0A1L8HPG1|A0A1L8HPG1_XENLA	XELAEV_18010218mg	Phosphoenolpyruvate carboxykinase (GTP) OS=Xenopus laevis OX=8355 GN=XELAEV_18010218mg PE=1 SV=1	1243	5	C	UR	792.751	823.318	671.537	793.943	843.065	879.537
sp|Q7T0P4|POC1A_XENLA	poc1a	POC1 centriolar protein homolog A OS=Xenopus laevis OX=8355 GN=poc1a PE=1 SV=2	1244	2	C	UR	186.575	220.12	163.239	146.442	108.545	119.032
tr|Q6GLZ2|Q6GLZ2_XENLA	prkcsh.S	Glucosidase 2 subunit beta OS=Xenopus laevis OX=8355 GN=prkcsh.S PE=2 SV=1	1245	5	C	UR	996.777	1076.19	1045.78	1144.05	1506.04	1536.01
tr|Q6AZH1|Q6AZH1_XENLA	prkcsh.L	Glucosidase 2 subunit beta OS=Xenopus laevis OX=8355 GN=prkcsh.L PE=2 SV=1	1245	2	C	UR	193.518	199.389	173.561	219.256	224.846	282.685
tr|A0A1L8FT16|A0A1L8FT16_XENLA	lypla1.S	Abhydrolase_2 domain-containing protein OS=Xenopus laevis OX=8355 GN=lypla1.S PE=3 SV=1	1246	1	C	UR	106.129	100.71	112.246	129.106	152.707	155.529
tr|Q6GNX0|Q6GNX0_XENLA		GATOR complex protein SEC13 OS=Xenopus laevis OX=8355 PE=2 SV=1	1247	9	C	UR	757.769	759.769	989.566	773.847	3168.81	2180.62
tr|Q6IRQ1|Q6IRQ1_XENLA	abcd3.S	70 kDa peroxisomal membrane protein OS=Xenopus laevis OX=8355 GN=abcd3.S PE=1 SV=1	1248	7	C	UR	356.419	325.313	787.365	1018.53	348.969	370.606
tr|Q32NN1|Q32NN1_XENLA	recql.L	ATP-dependent DNA helicase OS=Xenopus laevis OX=8355 GN=recql.L PE=2 SV=1	1249	1	C	UR	45.6009	34.6242	30.4977	36.2227	37.3954	29.4907
tr|A0A1L8ETY8|A0A1L8ETY8_XENLA	rpl27.L	60S ribosomal protein L27 OS=Xenopus laevis OX=8355 GN=rpl27.L PE=3 SV=1	1250	4	C	UR	678.381	967.509	1238.22	1551.52	1607.24	1485.42
sp|Q6NRM6|MCM9_XENLA	mcm9	DNA helicase MCM9 OS=Xenopus laevis OX=8355 GN=mcm9 PE=1 SV=1	1251	3	C	UR	301.661	444.42	439.174	369.738	236.667	235.383
sp|Q6P423|MED23_XENLA	med23	Mediator of RNA polymerase II transcription subunit 23 OS=Xenopus laevis OX=8355 GN=med23 PE=2 SV=1	1252	2	C	UR	133.951	118.599	149.63	164.244	129.451	119.854
tr|Q7ZY09|Q7ZY09_XENLA	rps12.L	40S ribosomal protein S12 OS=Xenopus laevis OX=8355 GN=rps12.L PE=2 SV=1	1253	8	C	UR	550.042	785.843	1151.18	1375.1	1560.02	1786.58
tr|A0A1L8GH49|A0A1L8GH49_XENLA	tptep2-csnk1e.S	Protein kinase domain-containing protein OS=Xenopus laevis OX=8355 GN=tptep2-csnk1e.S PE=3 SV=1	1254	2	C	UR	297.668	287.965	227.046	295.967	166.048	187.824
tr|Q66J07|Q66J07_XENLA	nnt.L	Proton-translocating NAD(P)(+) transhydrogenase OS=Xenopus laevis OX=8355 GN=nnt.L PE=1 SV=1	1255	3	C	UR	275.212	303.63	273.098	325.185	311.365	403.799
tr|Q7T0Y0|Q7T0Y0_XENLA	lrrc47.L	MGC68895 protein OS=Xenopus laevis OX=8355 GN=lrrc47.L PE=1 SV=1	1256	4	C	UR	471.996	470.379	472.577	519.943	523.913	535.582
sp|Q8QHA5|DNA2_XENLA	dna2	DNA replication ATP-dependent helicase/nuclease DNA2 OS=Xenopus laevis OX=8355 GN=dna2 PE=1 SV=1	1258	9	C	UR	845.217	875.695	794.588	962.085	773.963	795.762
tr|A0A1L8FYP6|A0A1L8FYP6_XENLA	smchd1.L	SMC hinge domain-containing protein OS=Xenopus laevis OX=8355 GN=smchd1.L PE=1 SV=1	1259	13	C	UR	1757.07	1578.17	1588.05	1521.58	1717.24	1604.45
tr|A0A310TYU6|A0A310TYU6_XENLA	XELAEV_18000304mg	Dihydrolipoamide acetyltransferase component of pyruvate dehydrogenase complex OS=Xenopus laevis OX=8355 GN=XELAEV_18000304mg PE=3 SV=1	1260	1	C	UR	128.23	140.416	130.055	140.777	158.728	154.923
tr|Q90X60|Q90X60_XENLA		Delta-tubulin OS=Xenopus laevis OX=8355 PE=2 SV=1	1262	2	C	UR	338.072	337.674	270.193	302.562	226.034	245.487
tr|A0A1L8H7G7|A0A1L8H7G7_XENLA	XELAEV_18015072mg	Nuclear distribution protein C homolog OS=Xenopus laevis OX=8355 GN=XELAEV_18015072mg PE=1 SV=1	1263	14	C	UR	2020.52	2347.91	2186.3	2626.57	2756.91	2734.93
sp|Q6DCQ0|P4R2B_XENLA	ppp4r2-b	Serine/threonine-protein phosphatase 4 regulatory subunit 2-B OS=Xenopus laevis OX=8355 GN=ppp4r2-b PE=2 SV=1	1264	1	C	UR	70.7603	75.8805	67.1951	66.0332	87.4267	74.4995
sp|Q5M7D6|P4R2A_XENLA	ppp4r2-a	Serine/threonine-protein phosphatase 4 regulatory subunit 2-A OS=Xenopus laevis OX=8355 GN=ppp4r2-a PE=2 SV=1	1264	2	C	UR	187.625	146.208	138.07	138.892	146.068	159.402
tr|A0A1L8EYS2|A0A1L8EYS2_XENLA	XELAEV_18045528mg	WD_REPEATS_REGION domain-containing protein OS=Xenopus laevis OX=8355 GN=XELAEV_18045528mg PE=1 SV=1	1265	2	C	UR	89.6324	112.48	103.837	104.18	110.477	131.734
tr|Q66IX2|Q66IX2_XENLA	psmd13.S	26S proteasome non-ATPase regulatory subunit 13 OS=Xenopus laevis OX=8355 GN=psmd13.S PE=2 SV=1	1266	9	C	UR	1884	1779.41	1835.85	2039.83	1942.53	1748.41
sp|Q498L2|SLTM_XENLA	sltm	SAFB-like transcription modulator OS=Xenopus laevis OX=8355 GN=sltm PE=2 SV=1	1267	3	C	UR	465.796	457.632	293.452	267.208	251.993	264.444
tr|A0A1L8FWK3|A0A1L8FWK3_XENLA	acad11.L	Uncharacterized protein OS=Xenopus laevis OX=8355 GN=acad11.L PE=1 SV=1	1268	9	C	UR	624.721	582.354	1276.51	1604.75	609.468	658.526
tr|A0A1L8HUA1|A0A1L8HUA1_XENLA	trim2.L	Uncharacterized protein OS=Xenopus laevis OX=8355 GN=trim2.L PE=3 SV=1	1269	5	C	UR	570.143	694.618	701.619	541.052	467.601	455.963
tr|A0A1L8HBL9|A0A1L8HBL9_XENLA	XELAEV_18016562mg	Uncharacterized protein OS=Xenopus laevis OX=8355 GN=XELAEV_18016562mg PE=3 SV=1	1269	1	C	UR	62.1012	93.5516	79.7839	58.0423	50.4185	44.5824
tr|A0A1L8GTQ4|A0A1L8GTQ4_XENLA	gdi2.S	Rab GDP dissociation inhibitor OS=Xenopus laevis OX=8355 GN=gdi2.S PE=1 SV=1	1270	17	C	UR	1716.88	1899.48	2022.77	2514.39	2266.75	2592.32
tr|A0A1L8GZG8|A0A1L8GZG8_XENLA	gdi2.L	Rab GDP dissociation inhibitor OS=Xenopus laevis OX=8355 GN=gdi2.L PE=3 SV=1	1270	7	C	UR	477.643	564.961	732.225	827.999	808.101	943.725
tr|A0A1L8FKS3|A0A1L8FKS3_XENLA	wdfy4.L	Uncharacterized protein OS=Xenopus laevis OX=8355 GN=wdfy4.L PE=4 SV=1	1271	1	C	UR	74.8232	58.2223	47.2859	45.2994	43.7203	40.1033
tr|Q66IN5|Q66IN5_XENLA	XB5768883.L	MGC86492 protein OS=Xenopus laevis OX=8355 GN=XB5768883.L PE=2 SV=1	1272	9	C	UR	611.886	556.914	610.531	621.99	797.901	803.695
sp|P13549|EF1A0_XENLA	eef1as	Elongation factor 1-alpha, somatic form OS=Xenopus laevis OX=8355 GN=eef1as PE=2 SV=1	1273	24	C	UR	5761.28	5819.43	6063.58	5680.53	5799.67	6072.68
sp|P17507|EF1A2_XENLA	eef1ao	Elongation factor 1-alpha, oocyte form OS=Xenopus laevis OX=8355 GN=eef1ao PE=1 SV=1	1273	56	C	UR	5616	5498.23	5778.39	5859.78	5728.3	6084.62
sp|P17508|EF1A3_XENLA		Elongation factor 1-alpha, oocyte form OS=Xenopus laevis OX=8355 PE=1 SV=2	1273	13	C	UR	1040.99	1279.75	1348.19	1126.92	1271.52	1257.25
tr|Q7SYT0|Q7SYT0_XENLA	eef1a2.S	Elongation factor 1-alpha OS=Xenopus laevis OX=8355 GN=eef1a2.S PE=2 SV=1	1273	1	C	UR	48.1155	33.4255	55.4485	39.4754	29.952	34.567
tr|Q640D9|Q640D9_XENLA	LOC494720	Elongation factor 1-alpha OS=Xenopus laevis OX=8355 GN=LOC494720 PE=2 SV=1	1273	1	C	UR	76.9281	82.7282	88.1985	72.4042	95.4946	69.6783
tr|Q8AVQ1|Q8AVQ1_XENLA		60S ribosomal protein L13 OS=Xenopus laevis OX=8355 PE=2 SV=1	1274	5	C	UR	548	1006.92	1185.65	1565.15	1511.56	1471.48
tr|A0A1L8H0S7|A0A1L8H0S7_XENLA	unc45a.L	TPR_REGION domain-containing protein OS=Xenopus laevis OX=8355 GN=unc45a.L PE=1 SV=1	1275	1	C	UR	46.1608	50.0251	39.3245	41.8268	44.3299	44.8789
tr|Q70PC5|Q70PC5_XENLA	kpna6.L	Importin subunit alpha OS=Xenopus laevis OX=8355 GN=kpna6.L PE=1 SV=1	1276	3	C	UR	452.368	432.175	399.804	458.137	437.02	493.97
tr|Q6IP69|Q6IP69_XENLA	kpna6.S	Importin subunit alpha OS=Xenopus laevis OX=8355 GN=kpna6.S PE=2 SV=1	1276	4	C	UR	313.689	321.331	303.118	342.903	307.674	314.839
sp|Q6INR1|EIF3J_XENLA	eif3j	Eukaryotic translation initiation factor 3 subunit J OS=Xenopus laevis OX=8355 GN=eif3j PE=2 SV=1	1278	7	C	UR	938.437	987.97	992.071	1111.38	1359.11	1427.34
tr|A0A1L8H192|A0A1L8H192_XENLA	XELAEV_18018480mg	Eukaryotic translation initiation factor 3 30 kDa subunit (Fragment) OS=Xenopus laevis OX=8355 GN=XELAEV_18018480mg PE=1 SV=1	1278	2	C	UR	254.778	351.369	372.762	472.078	459.703	508.093
tr|Q6DCU1|Q6DCU1_XENLA	myl9.L	MGC80742 protein OS=Xenopus laevis OX=8355 GN=myl9.L PE=2 SV=1	1279	1	C	UR	57.1697	44.4012	45.1944	49.3118	50.3952	112.81
sp|P0DP34|CAM2A_XENLA	calm2-a	Calmodulin-2 A OS=Xenopus laevis OX=8355 GN=calm2-a PE=1 SV=1	1280	1	C	UR	178.528	176.928	165.227	313.353	247.441	327.015
tr|A0A1L8FZ14|A0A1L8FZ14_XENLA	XELAEV_18032029mg	Kinesin-like protein OS=Xenopus laevis OX=8355 GN=XELAEV_18032029mg PE=3 SV=1	1281	7	C	UR	743.317	748.77	853.722	883.935	615.119	719.877
tr|A0A310UHU0|A0A310UHU0_XENLA	XELAEV_18003956mg	Uncharacterized protein (Fragment) OS=Xenopus laevis OX=8355 GN=XELAEV_18003956mg PE=4 SV=1	1282	2	C	UR	97.5533	151.276	152.557	172.823	190.017	234.682
tr|A0A1L8HC69|A0A1L8HC69_XENLA	XELAEV_18011331mg	Protein maelstrom homolog OS=Xenopus laevis OX=8355 GN=XELAEV_18011331mg PE=1 SV=1	1283	5	C	UR	1071.32	1250.61	1016.48	911.216	646.795	640.87
sp|Q8AY68|SHC1_XENLA	shc1	SHC-transforming protein 1 OS=Xenopus laevis OX=8355 GN=shc1 PE=1 SV=2	1284	3	C	UR	492.458	419.554	387.078	412.792	393.61	405.995
tr|A0A1L8H2V9|A0A1L8H2V9_XENLA	dnajb1.L	J domain-containing protein OS=Xenopus laevis OX=8355 GN=dnajb1.L PE=1 SV=1	1285	9	C	UR	2601.83	2624.96	1276.22	1095.4	834.981	839.21
tr|A0A1L8F7C6|A0A1L8F7C6_XENLA	picalml.L	ENTH domain-containing protein OS=Xenopus laevis OX=8355 GN=picalml.L PE=3 SV=1	1286	1	C	UR	237.94	351.102	265.344	191.162	144.973	187.605
tr|Q9PTK7|Q9PTK7_XENLA	snap91.S	Clathrin assembly protein AP180 OS=Xenopus laevis OX=8355 GN=snap91.S PE=2 SV=1	1286	1	C	UR	121.892	82.4603	152.063	115.865	90.2449	92.0728
tr|A0A1L8EQF0|A0A1L8EQF0_XENLA	trrap.S	Uncharacterized protein OS=Xenopus laevis OX=8355 GN=trrap.S PE=1 SV=1	1288	2	C	UR	81.0092	78.4127	129.417	125.969	72.3008	74.1305
sp|Q9DE46|DPOLA_XENLA	pola1	DNA polymerase alpha catalytic subunit OS=Xenopus laevis OX=8355 GN=pola1 PE=1 SV=1	1289	7	C	UR	1630.27	1652.51	1544.05	1574.95	1383.38	1427.52
tr|A0A1L8G246|A0A1L8G246_XENLA	XELAEV_180289841mg	Uncharacterized protein (Fragment) OS=Xenopus laevis OX=8355 GN=XELAEV_180289841mg PE=1 SV=1	1290	2	C	UR	469.673	687.684	525.898	281.812	347.864	262.715
tr|A0A1L8G7P0|A0A1L8G7P0_XENLA	XELAEV_18026729mg	Uncharacterized protein OS=Xenopus laevis OX=8355 GN=XELAEV_18026729mg PE=3 SV=1	1290	10	C	UR	2192.62	2445.26	1913.89	1430.77	1685.08	1540.67
tr|A0A1L8FAY4|A0A1L8FAY4_XENLA	XELAEV_18039986mg	Uncharacterized protein OS=Xenopus laevis OX=8355 GN=XELAEV_18039986mg PE=1 SV=1	1290	5	C	UR	276.168	328.099	309.386	265.369	273.659	260.873
tr|A0A1L8GYG0|A0A1L8GYG0_XENLA	XELAEV_18017471mg	FYVE-type domain-containing protein OS=Xenopus laevis OX=8355 GN=XELAEV_18017471mg PE=1 SV=1	1291	2	C	UR	128.978	172.303	158.729	144.172	164.985	189.678
tr|A0A1L8HF09|A0A1L8HF09_XENLA	capza1.L	F-actin-capping protein subunit alpha OS=Xenopus laevis OX=8355 GN=capza1.L PE=1 SV=1	1292	3	C	UR	456.362	515.995	474.415	649.059	623.565	674.325
tr|Q7SY64|Q7SY64_XENLA	pepd.S	MGC64570 protein OS=Xenopus laevis OX=8355 GN=pepd.S PE=2 SV=1	1293	12	C	UR	2064.63	2347.33	2682.74	2506.12	3055.75	3169.04
tr|A0A1L8EU11|A0A1L8EU11_XENLA	plcg1.L	1-phosphatidylinositol 4,5-bisphosphate phosphodiesterase gamma OS=Xenopus laevis OX=8355 GN=plcg1.L PE=1 SV=1	1294	3	C	UR	303.459	291.568	258.731	308.13	312.428	346.066
tr|A0A1L8I0W3|A0A1L8I0W3_XENLA	XELAEV_18007770mg	Uncharacterized protein OS=Xenopus laevis OX=8355 GN=XELAEV_18007770mg PE=3 SV=1	1295	1	C	UR	40.2659	41.0537	64.9669	65.1704	43.9531	50.9148
tr|A0A1L8HGB4|A0A1L8HGB4_XENLA	mybbp1a.L	Uncharacterized protein OS=Xenopus laevis OX=8355 GN=mybbp1a.L PE=3 SV=1	1296	6	C	UR	494.834	581.105	867.696	828.841	792.284	871.199
tr|Q6DJK7|Q6DJK7_XENLA	vps4b.L	Vesicle-fusing ATPase OS=Xenopus laevis OX=8355 GN=vps4b.L PE=2 SV=1	1298	7	C	UR	1140.64	1189.34	1227.33	1455.83	1109.43	1188.1
tr|Q6GNH1|Q6GNH1_XENLA	rpl23.S	60S ribosomal protein L23 OS=Xenopus laevis OX=8355 GN=rpl23.S PE=1 SV=1	1299	16	C	UR	1398.68	1712.25	2333.78	2483.6	2724.48	2837.16
tr|B9UR70|B9UR70_XENLA	kif13b.L	Kinesin 13B OS=Xenopus laevis OX=8355 GN=kif13b.L PE=2 SV=1	1300	2	C	UR	202.311	278.947	155.529	174.299	152.743	168.29
sp|Q8AXM9|CTND1_XENLA	ctnnd1	Catenin delta-1 OS=Xenopus laevis OX=8355 GN=ctnnd1 PE=1 SV=1	1301	7	C	UR	1384.36	1449.61	1436.19	1013.41	849.199	795.55
tr|A0A1L8FAF7|A0A1L8FAF7_XENLA	XELAEV_18039848mg	Uncharacterized protein OS=Xenopus laevis OX=8355 GN=XELAEV_18039848mg PE=3 SV=1	1302	11	C	UR	1787.52	1878.32	2166.02	2086.5	1858.98	1952.09
tr|A0A1L8EZW9|A0A1L8EZW9_XENLA	XELAEV_18041102mg	Uncharacterized protein OS=Xenopus laevis OX=8355 GN=XELAEV_18041102mg PE=1 SV=1	1302	3	C	UR	197.682	172.468	214.912	208.877	193.808	196.602
tr|Q4KL86|Q4KL86_XENLA	dlgap5.L	MGC116559 protein OS=Xenopus laevis OX=8355 GN=dlgap5.L PE=2 SV=1	1302	3	C	UR	127.208	133.847	167.598	169.923	154.713	166.507
sp|Q68F70|INT4_XENLA	ints4	Integrator complex subunit 4 OS=Xenopus laevis OX=8355 GN=ints4 PE=2 SV=1	1303	1	C	UR	171.428	256.719	186.948	178.959	66.1055	58.9301
tr|A0A1L8GQA7|A0A1L8GQA7_XENLA	XELAEV_18019685mg	WD_REPEATS_REGION domain-containing protein OS=Xenopus laevis OX=8355 GN=XELAEV_18019685mg PE=4 SV=1	1304	5	C	UR	353.616	361.509	335.077	405.123	396.166	447.402
tr|A0A1L8GVT1|A0A1L8GVT1_XENLA	XELAEV_18016577mg	WD_REPEATS_REGION domain-containing protein OS=Xenopus laevis OX=8355 GN=XELAEV_18016577mg PE=1 SV=1	1304	1	C	UR	161.284	151.877	141.31	142.452	155.087	180.467
sp|P49401|RS4_XENLA	rps4	40S ribosomal protein S4 OS=Xenopus laevis OX=8355 GN=rps4 PE=2 SV=4	1305	16	C	UR	1533.77	1870.51	2419.68	2836.33	2629.62	3003.92
tr|A0A1L8F6K6|A0A1L8F6K6_XENLA	XELAEV_18038505mg	40S ribosomal protein S4 OS=Xenopus laevis OX=8355 GN=XELAEV_18038505mg PE=3 SV=1	1305	1	C	UR	326.302	461.137	658.508	718.905	697.918	837.049
tr|Q5FWM5|Q5FWM5_XENLA	tasp1.S	Tasp1 protein OS=Xenopus laevis OX=8355 GN=tasp1.S PE=1 SV=1	1306	5	C	UR	369.293	346.038	500.854	582.395	588.645	515.331
tr|Q6GQB3|Q6GQB3_XENLA	prdx1.S	MGC80194 protein OS=Xenopus laevis OX=8355 GN=prdx1.S PE=2 SV=1	1307	2	C	UR	260.659	316.761	337.848	394.109	374.047	472.284
tr|G3GBS3|G3GBS3_XENLA	PRDX2	Peroxiredoxin 2 OS=Xenopus laevis OX=8355 GN=PRDX2 PE=1 SV=1	1307	13	C	UR	2540.62	2396.32	2791.88	3206.73	2942.96	3403.04
tr|Q6IND2|Q6IND2_XENLA	prdx1.L	MGC83501 protein OS=Xenopus laevis OX=8355 GN=prdx1.L PE=1 SV=1	1307	6	C	UR	938.181	997.4	1040.97	1197.52	1219.76	1390.01
tr|B7ZQY0|B7ZQY0_XENLA	LOC398655	Velo1 splice variant 1 OS=Xenopus laevis OX=8355 GN=LOC398655 PE=2 SV=1	1308	4	C	UR	405.782	514.066	610.571	657.739	691.188	779.01
tr|Q7ZX55|Q7ZX55_XENLA	dcaf11.L	DDB1- and CUL4-associated factor 11 OS=Xenopus laevis OX=8355 GN=dcaf11.L PE=1 SV=1	1309	3	C	UR	581.5	409.676	381.689	345.446	339.353	291.79
sp|Q9W6K1|MRE11_XENLA	mre11	Double-strand break repair protein MRE11 OS=Xenopus laevis OX=8355 GN=mre11 PE=2 SV=1	1310	3	C	UR	372.427	398.69	400.22	408.234	434.682	425.33
tr|A0A1L8GCQ0|A0A1L8GCQ0_XENLA	sf3b2.S	PSP domain-containing protein OS=Xenopus laevis OX=8355 GN=sf3b2.S PE=1 SV=1	1311	4	C	UR	288.799	280.09	298.23	286.721	290.365	332.374
tr|A0A1L8H602|A0A1L8H602_XENLA	XELAEV_18014553mg	Eukaryotic translation initiation factor 4C OS=Xenopus laevis OX=8355 GN=XELAEV_18014553mg PE=3 SV=1	1312	1	C	UR	90.9917	55.6793	68.2587	72.6339	99.3483	65.7957
sp|Q0IHJ3|HAUS8_XENLA	haus8	HAUS augmin-like complex subunit 8 OS=Xenopus laevis OX=8355 GN=haus8 PE=2 SV=1	1313	2	C	UR	250.8	250.26	250.895	235.926	214.094	213.952
tr|A0A1L8G7I3|A0A1L8G7I3_XENLA	dstn.L	ADF-H domain-containing protein OS=Xenopus laevis OX=8355 GN=dstn.L PE=1 SV=1	1314	1	C	UR	46.8337	37.6699	39.033	57.9654	49.9246	51.398
tr|Q7ZXT8|Q7ZXT8_XENLA	impdh2.L	Inosine-5'-monophosphate dehydrogenase OS=Xenopus laevis OX=8355 GN=impdh2.L PE=1 SV=1	1315	1	C	UR	229.642	304.306	348.198	339.46	292.53	333.217
tr|Q7ZWN1|Q7ZWN1_XENLA	impdh1.L	Inosine-5'-monophosphate dehydrogenase OS=Xenopus laevis OX=8355 GN=impdh1.L PE=1 SV=1	1315	3	C	UR	456.663	585.556	516.261	565.374	447.322	626.098
tr|A0A1L8GTM2|A0A1L8GTM2_XENLA	IMPDH	Inosine-5'-monophosphate dehydrogenase OS=Xenopus laevis OX=8355 GN=IMPDH PE=1 SV=1	1315	3	C	UR	419.8	522.768	425.663	485.44	439.189	546.444
tr|A0A1L8HEB9|A0A1L8HEB9_XENLA	XELAEV_18012108mg	ARID domain-containing protein (Fragment) OS=Xenopus laevis OX=8355 GN=XELAEV_18012108mg PE=4 SV=1	1316	2	C	UR	344.806	310.792	285.866	277.638	279.05	274.738
tr|Q6GPV7|Q6GPV7_XENLA	gga1.S	MGC82581 protein OS=Xenopus laevis OX=8355 GN=gga1.S PE=1 SV=1	1317	2	C	UR	211.237	225.611	174.107	216.319	224.238	293.24
tr|A0A1L8GS48|A0A1L8GS48_XENLA	XELAEV_18020350mg	Glutamine--fructose-6-phosphate transaminase (isomerizing) OS=Xenopus laevis OX=8355 GN=XELAEV_18020350mg PE=1 SV=1	1319	7	C	UR	621.825	781.028	815.74	906.414	899.394	1092.58
tr|A0A1L8HCY3|A0A1L8HCY3_XENLA	cxadr.L	Uncharacterized protein OS=Xenopus laevis OX=8355 GN=cxadr.L PE=4 SV=1	1320	3	C	UR	225.038	216.548	226.896	226.394	420.853	478.193
tr|A0A1L8G2S7|A0A1L8G2S7_XENLA	marcks.S	Uncharacterized protein OS=Xenopus laevis OX=8355 GN=marcks.S PE=1 SV=1	1321	1	C	UR	76.3671	80.4281	87.4234	93.0577	101.632	132.364
sp|Q6DFB7|POC5_XENLA	poc5	Centrosomal protein POC5 OS=Xenopus laevis OX=8355 GN=poc5 PE=2 SV=1	1322	4	C	UR	322.012	377.681	274.255	240.177	154.208	157.185
tr|A0A1L8END8|A0A1L8END8_XENLA	trim25.S	Uncharacterized protein OS=Xenopus laevis OX=8355 GN=trim25.S PE=1 SV=1	1323	4	C	UR	411.293	623.85	684.619	571.906	477.406	591
tr|A0A1L8H2N6|A0A1L8H2N6_XENLA	XELAEV_18018974mg	BTB domain-containing protein OS=Xenopus laevis OX=8355 GN=XELAEV_18018974mg PE=1 SV=1	1324	2	C	UR	102.947	98.7307	95.1547	79.3462	83.7091	104.894
tr|A0A1L8HPU6|A0A1L8HPU6_XENLA	XELAEV_18010314mg	DNA-(apurinic or apyrimidinic site) endonuclease OS=Xenopus laevis OX=8355 GN=XELAEV_18010314mg PE=1 SV=1	1325	2	C	UR	197.123	186.938	214.965	244.095	240.227	269.279
tr|Q6IP62|Q6IP62_XENLA	apex1.L	DNA-(apurinic or apyrimidinic site) endonuclease OS=Xenopus laevis OX=8355 GN=apex1.L PE=1 SV=1	1325	3	C	UR	593.084	520.519	496.164	486.656	612.296	533.874
tr|Q8UVU2|Q8UVU2_XENLA	lig3.L	DNA ligase OS=Xenopus laevis OX=8355 GN=lig3.L PE=2 SV=1	1326	2	C	UR	232.373	263.198	253.111	231.025	239.893	238.668
tr|Q63ZN3|Q63ZN3_XENLA	LOC494771	LOC494771 protein (Fragment) OS=Xenopus laevis OX=8355 GN=LOC494771 PE=2 SV=1	1328	7	C	UR	1150.47	1111.66	1108.22	1072.88	1217.11	1259.72
tr|A0A1L8G6Q2|A0A1L8G6Q2_XENLA	esf1.L	NUC153 domain-containing protein OS=Xenopus laevis OX=8355 GN=esf1.L PE=1 SV=1	1329	1	C	UR	91.9678	85.1709	77.8714	78.0113	90.3093	99.1443
tr|Q5DQT9|Q5DQT9_XENLA	Nogo-B2	Reticulon OS=Xenopus laevis OX=8355 GN=Nogo-B2 PE=2 SV=1	1330	1	C	UR	31.0657	51.1243	67.3258	69.8649	90.7014	93.072
sp|P10999-2|LAML3_XENLA		Isoform 2 of Lamin-L(III) OS=Xenopus laevis OX=8355	1331	2	C	UR	915.042	808.701	390.627	458.166	429.527	448.563
tr|A0A1L8FJX2|A0A1L8FJX2_XENLA	XELAEV_18034877mg	SEC7 domain-containing protein OS=Xenopus laevis OX=8355 GN=XELAEV_18034877mg PE=1 SV=1	1332	8	C	UR	956.237	947.567	923.906	860.612	974.928	1046.66
tr|A0A1L8FER8|A0A1L8FER8_XENLA	hnrnph3.S	Uncharacterized protein OS=Xenopus laevis OX=8355 GN=hnrnph3.S PE=4 SV=1	1333	5	C	UR	948.002	933.139	527.167	496.928	520.27	562.069
tr|A0A1L8FJQ2|A0A1L8FJQ2_XENLA	hnrnph3.L	Uncharacterized protein OS=Xenopus laevis OX=8355 GN=hnrnph3.L PE=4 SV=1	1333	1	C	UR	82.5086	75.177	48.944	36.0644	44.8004	39.2303
tr|Q6DDF2|Q6DDF2_XENLA	acad9.S	Acad9-prov protein OS=Xenopus laevis OX=8355 GN=acad9.S PE=2 SV=1	1334	4	C	UR	245.176	305.574	238.401	258.626	206.118	266.309
tr|A0A1L8G8J3|A0A1L8G8J3_XENLA	XELAEV_18026974mg	FERM domain-containing protein OS=Xenopus laevis OX=8355 GN=XELAEV_18026974mg PE=1 SV=1	1335	10	C	UR	1123.3	1314.79	1505.76	1427.12	1876.21	1877.23
tr|A0A1L8FAR9|A0A1L8FAR9_XENLA	fmn1.L	FH2 domain-containing protein OS=Xenopus laevis OX=8355 GN=fmn1.L PE=3 SV=1	1336	1	C	UR	34.8968	161.803	52.2855	22.0627	34.5823	255.213
tr|A0A1L8HBE3|A0A1L8HBE3_XENLA	XELAEV_18016499mg	Nuclear pore complex protein Nup96 OS=Xenopus laevis OX=8355 GN=XELAEV_18016499mg PE=1 SV=1	1337	3	C	UR	218.343	288.167	814.992	481.797	313.775	328.487
tr|Q6DCP4|Q6DCP4_XENLA	Nup98	Nup98 protein (Fragment) OS=Xenopus laevis OX=8355 GN=Nup98 PE=2 SV=1	1337	1	C	UR	51.6275	93.2046	287.176	135.463	62.1743	80.1978
tr|A0A1L8HJT4|A0A1L8HJT4_XENLA	XELAEV_18013967mg	Nuclear pore complex protein Nup96 OS=Xenopus laevis OX=8355 GN=XELAEV_18013967mg PE=1 SV=1	1337	1	C	UR	95.3942	159.033	117.026	99.4256	71.5438	69.1583
tr|A0A1L8EYB5|A0A1L8EYB5_XENLA	XELAEV_18045456mg	Coronin OS=Xenopus laevis OX=8355 GN=XELAEV_18045456mg PE=1 SV=1	1338	1	C	UR	81.5527	68.1088	70.2192	63.9569	68.0723	72.4828
tr|Q5XHD0|Q5XHD0_XENLA	commd8.S	LOC495034 protein OS=Xenopus laevis OX=8355 GN=commd8.S PE=1 SV=1	1339	2	C	UR	206.619	150.672	180.885	190.209	144.496	162.703
tr|A0A1L8G4K3|A0A1L8G4K3_XENLA	XELAEV_18029833mg	Uncharacterized protein OS=Xenopus laevis OX=8355 GN=XELAEV_18029833mg PE=4 SV=1	1340	12	C	UR	1792.22	2383.58	1701.38	1697.98	2768.91	2489.41
tr|Q6DFG8|Q6DFG8_XENLA	gyg1.L	Gyg protein OS=Xenopus laevis OX=8355 GN=gyg1.L PE=2 SV=1	1340	2	C	UR	138.592	163.583	120.821	136.479	180.934	179.412
sp|Q66KU4|RL36_XENLA	rpl36	60S ribosomal protein L36 OS=Xenopus laevis OX=8355 GN=rpl36 PE=3 SV=1	1341	2	C	UR	195.71	162.599	172.533	197.589	205.544	230.434
tr|A0A1L8EKW4|A0A1L8EKW4_XENLA	calcoco2.S	C2H2-type domain-containing protein OS=Xenopus laevis OX=8355 GN=calcoco2.S PE=4 SV=1	1342	1	C	UR	135.756	99.8113	116.759	120.334	115.044	116.005
tr|Q6INV2|Q6INV2_XENLA	araf.S	ARAF protein OS=Xenopus laevis OX=8355 GN=araf.S PE=1 SV=1	1344	5	C	UR	488.152	424.064	300.509	310.103	269.765	294.381
tr|A0A1L8HV39|A0A1L8HV39_XENLA	XELAEV_18005728mg	Serine/threonine-protein phosphatase OS=Xenopus laevis OX=8355 GN=XELAEV_18005728mg PE=1 SV=1	1345	2	C	UR	206.431	215.706	160.447	171.68	167.92	188.126
tr|A0A310TNC6|A0A310TNC6_XENLA	ppp3cc.S	Serine/threonine-protein phosphatase OS=Xenopus laevis OX=8355 GN=ppp3cc.S PE=1 SV=1	1345	3	C	UR	329.811	367.969	298.818	325.884	347.873	390.131
sp|Q6IRM9|ZWILC_XENLA	zwilch	Protein zwilch homolog OS=Xenopus laevis OX=8355 GN=zwilch PE=2 SV=1	1346	16	C	UR	3349.31	2647.13	3002.35	2482.24	1552.49	1354.83
tr|Q91980|Q91980_XENLA	tcea1.L	LOC594866 protein OS=Xenopus laevis OX=8355 GN=tcea1.L PE=1 SV=1	1347	2	C	UR	207.972	152.563	153.85	176.023	185.247	176.938
tr|Q91860|Q91860_XENLA	tcea1.S	TFIIS elongation factor OS=Xenopus laevis OX=8355 GN=tcea1.S PE=2 SV=1	1347	3	C	UR	252.884	279.018	286.973	298.274	363.872	350.056
tr|A0A1L8GM75|A0A1L8GM75_XENLA	XELAEV_18023071mg	Alcohol dehydrogenase (NADP(+)) OS=Xenopus laevis OX=8355 GN=XELAEV_18023071mg PE=1 SV=1	1348	8	C	UR	731.217	949.675	922.136	1132.48	1077.09	1302.56
sp|Q98SM3|EZH2A_XENLA	ezh2-a	Histone-lysine N-methyltransferase EZH2 OS=Xenopus laevis OX=8355 GN=ezh2-a PE=2 SV=1	1349	1	C	UR	98.6251	60.7913	40.7763	44.2374	22.3308	36.3099
tr|Q0IHC0|Q0IHC0_XENLA	nudt9.L	Nudt9 protein OS=Xenopus laevis OX=8355 GN=nudt9.L PE=2 SV=1	1350	2	C	UR	151.388	119.532	127.835	106.588	138.604	117.982
tr|Q6NUD9|Q6NUD9_XENLA	rcbtb1.S	MGC81035 protein OS=Xenopus laevis OX=8355 GN=rcbtb1.S PE=2 SV=1	1351	1	C	UR	82.9963	115.287	113.819	90.8691	31.4196	29.5849
tr|A0A1L8HIU1|A0A1L8HIU1_XENLA	XELAEV_18013653mg	BTB domain-containing protein OS=Xenopus laevis OX=8355 GN=XELAEV_18013653mg PE=4 SV=1	1351	2	C	UR	596.308	522.426	483.328	484.373	396.088	401.186
tr|A0A1L8GBE5|A0A1L8GBE5_XENLA	XELAEV_18027898mg	FABP domain-containing protein (Fragment) OS=Xenopus laevis OX=8355 GN=XELAEV_18027898mg PE=3 SV=1	1352	4	C	UR	415.945	588.067	647.913	742.344	824.138	833.819
tr|Q5FWN5|Q5FWN5_XENLA	msh6.L	DNA mismatch repair protein OS=Xenopus laevis OX=8355 GN=msh6.L PE=2 SV=1	1353	13	C	UR	809.936	1523.61	1536.35	1398.98	1270.93	1560.47
tr|A0A1L8FY28|A0A1L8FY28_XENLA	XELAEV_18031690mg	Uncharacterized protein OS=Xenopus laevis OX=8355 GN=XELAEV_18031690mg PE=1 SV=1	1354	1	C	UR	230.136	250.507	202.449	219.076	210.025	269.263
tr|A0A1L8GF45|A0A1L8GF45_XENLA	ddah1.S	Dimethylargininase OS=Xenopus laevis OX=8355 GN=ddah1.S PE=1 SV=1	1356	4	C	UR	519.559	568.413	614.321	749.85	614.125	888.248
tr|A0A1L8FD43|A0A1L8FD43_XENLA	tdrd10.L	Uncharacterized protein OS=Xenopus laevis OX=8355 GN=tdrd10.L PE=4 SV=1	1357	1	C	UR	83.8955	98.9608	70.8097	71.9959	52.84	58.0194
tr|A0A1L8FYX9|A0A1L8FYX9_XENLA	trappc8.L	Uncharacterized protein OS=Xenopus laevis OX=8355 GN=trappc8.L PE=1 SV=1	1358	2	C	UR	473.474	363.586	341.486	350.28	266.402	273.616
sp|Q640K3|NCKP1_XENLA	nckap1	Nck-associated protein 1 OS=Xenopus laevis OX=8355 GN=nckap1 PE=2 SV=1	1359	2	C	UR	131.869	173.175	116.941	155.123	138.954	152.072
tr|Q4FZW8|Q4FZW8_XENLA	pwp2.S	MGC115367 protein OS=Xenopus laevis OX=8355 GN=pwp2.S PE=2 SV=1	1360	2	C	UR	354.996	400.417	415.178	313.949	318.081	301.662
sp|Q6DD19|GPBP1_XENLA	gpbp1	Vasculin OS=Xenopus laevis OX=8355 GN=gpbp1 PE=2 SV=1	1362	1	C	UR	68.928	94.936	70.787	74.3642	58.2029	58.7937
tr|A0A1L8G6E2|A0A1L8G6E2_XENLA	XELAEV_18026267mg	Uncharacterized protein OS=Xenopus laevis OX=8355 GN=XELAEV_18026267mg PE=3 SV=1	1363	5	C	UR	584.961	580.765	662.846	730.1	741.597	787.024
tr|Q7ZTL9|Q7ZTL9_XENLA	ube3a.S	Ubiquitin-protein ligase E3A OS=Xenopus laevis OX=8355 GN=ube3a.S PE=1 SV=1	1366	6	C	UR	809.326	717.331	638.103	734.708	769.792	738.544
tr|A0A1L8HGV0|A0A1L8HGV0_XENLA	ube3a.L	Ubiquitin-protein ligase E3A OS=Xenopus laevis OX=8355 GN=ube3a.L PE=1 SV=1	1366	1	C	UR	122.241	108.018	101.927	118.218	129.195	135.232
tr|Q6GQK6|Q6GQK6_XENLA	cryzl1.L	MGC79085 protein OS=Xenopus laevis OX=8355 GN=cryzl1.L PE=1 SV=1	1367	6	C	UR	1060.51	1053.94	869.639	1022.11	949.759	1127.3
tr|A0A1L8H1C2|A0A1L8H1C2_XENLA	PROSC	Pyridoxal phosphate homeostasis protein OS=Xenopus laevis OX=8355 GN=PROSC PE=1 SV=1	1368	3	C	UR	490.847	481.32	620.004	754.522	781.967	721.106
tr|A0A1L8F977|A0A1L8F977_XENLA	XELAEV_18039438mg	Aldedh domain-containing protein OS=Xenopus laevis OX=8355 GN=XELAEV_18039438mg PE=3 SV=1	1369	2	C	UR	250.098	235.104	232.931	261.173	275.646	347.552
tr|A0A1L8F0L7|A0A1L8F0L7_XENLA	aldh6a1.S	Aldedh domain-containing protein OS=Xenopus laevis OX=8355 GN=aldh6a1.S PE=1 SV=1	1369	1	C	UR	87.2903	81.2467	54.4524	74.7731	76.8	93.2554
tr|A0A1L8G560|A0A1L8G560_XENLA	trappc12.S	TPR_REGION domain-containing protein OS=Xenopus laevis OX=8355 GN=trappc12.S PE=4 SV=1	1370	4	C	UR	487.138	385.31	373.621	405.287	361.213	349.492
tr|Q66KP7|Q66KP7_XENLA	rps28p9.L	40S ribosomal protein S28 OS=Xenopus laevis OX=8355 GN=rps28p9.L PE=2 SV=1	1371	5	C	UR	579.878	602.085	678.603	743.257	856.118	1116.52
tr|A0A1L8G584|A0A1L8G584_XENLA	XELAEV_18030133mg	PKS_ER domain-containing protein OS=Xenopus laevis OX=8355 GN=XELAEV_18030133mg PE=1 SV=1	1372	3	C	UR	484.308	366.443	350.209	414.789	409.584	480.591
sp|Q6GPC6|TB1RB_XENLA	tbl1xr1-b	F-box-like/WD repeat-containing protein TBL1XR1-B OS=Xenopus laevis OX=8355 GN=tbl1xr1-b PE=2 SV=1	1373	8	C	UR	1925.43	1712.02	943.301	757.23	772.912	703.714
tr|Q6DJK5|Q6DJK5_XENLA	cndp2.L	CNDP dipeptidase 2 (Metallopeptidase M20 family) OS=Xenopus laevis OX=8355 GN=cndp2.L PE=2 SV=1	1374	25	C	UR	2321.71	2394.82	2768.83	3047.98	3029.36	3333.03
tr|Q05AY3|Q05AY3_XENLA	cn2	Cn2 protein OS=Xenopus laevis OX=8355 GN=cn2 PE=2 SV=1	1374	10	C	UR	1376.08	1783.57	2030.8	2148.45	2280.44	2559.96
sp|Q5XGU5|DNJ6B_XENLA	dnajb6-b	DnaJ homolog subfamily B member 6-B OS=Xenopus laevis OX=8355 GN=dnajb6-b PE=2 SV=1	1376	3	C	UR	1102.45	1919.18	491.254	273.682	318.485	339.593
sp|Q5FWN8|DNJ6A_XENLA	dnajb6-a	DnaJ homolog subfamily B member 6-A OS=Xenopus laevis OX=8355 GN=dnajb6-a PE=2 SV=1	1376	3	C	UR	1096.63	2358.33	657.523	404.192	340.263	358.253
sp|Q566H4|MED16_XENLA	med16	Mediator of RNA polymerase II transcription subunit 16 OS=Xenopus laevis OX=8355 GN=med16 PE=2 SV=1	1378	4	C	UR	476.515	455.725	495.944	438.621	362.208	298.727
tr|Q7ZWR6|Q7ZWR6_XENLA	atp5f1b.S	ATP synthase subunit beta OS=Xenopus laevis OX=8355 GN=atp5f1b.S PE=1 SV=1	1379	9	C	UR	960.316	1083.11	1020.05	1309.15	1119.35	1667.83
sp|P47817|WEE2A_XENLA	wee2-a	Wee1-like protein kinase 2-A OS=Xenopus laevis OX=8355 GN=wee2-a PE=1 SV=2	1380	3	C	UR	362.474	577.164	409.011	375.304	311.066	300.039
tr|Q6DD57|Q6DD57_XENLA	hnrnph1.L	Hnrph2 protein OS=Xenopus laevis OX=8355 GN=hnrnph1.L PE=2 SV=1	1381	3	C	UR	412.617	623.43	363.076	377.027	231.359	253.254
tr|Q6IRC9|Q6IRC9_XENLA	hnrnph1.S	MGC78776 protein OS=Xenopus laevis OX=8355 GN=hnrnph1.S PE=1 SV=1	1381	4	C	UR	514.062	577.074	426.904	331.865	356.557	359.788
tr|Q6GPN8|Q6GPN8_XENLA	LOC443622	LOC443622 protein (Fragment) OS=Xenopus laevis OX=8355 GN=LOC443622 PE=2 SV=1	1382	1	C	UR	83.9207	100.899	64.8717	67.1755	69.1551	73.221
sp|Q68EY9|GMPBA_XENLA	gmppb-a	Mannose-1-phosphate guanyltransferase beta-A OS=Xenopus laevis OX=8355 GN=gmppb-a PE=2 SV=1	1383	2	C	UR	290.624	344.803	399.714	438.596	440.943	518.364
sp|A2VD83|GMPBB_XENLA	gmppb-b	Mannose-1-phosphate guanyltransferase beta-B OS=Xenopus laevis OX=8355 GN=gmppb-b PE=2 SV=1	1383	1	C	UR	75.2472	68.5027	61.369	85.5207	76.3353	84.9823
tr|Q4V7J3|Q4V7J3_XENLA	XB5727280.S	LOC494706 protein OS=Xenopus laevis OX=8355 GN=XB5727280.S PE=2 SV=1	1384	4	C	UR	653.566	670.03	1104.99	1400.99	928.804	1168.04
tr|Q58E16|Q58E16_XENLA	gpx1.L	Glutathione peroxidase OS=Xenopus laevis OX=8355 GN=gpx1.L PE=1 SV=1	1386	3	C	UR	393.905	379.372	360.371	462.726	411.59	492.777
sp|Q6GME2|CK054_XENLA		Ester hydrolase C11orf54 homolog OS=Xenopus laevis OX=8355 PE=2 SV=1	1387	5	C	UR	532.945	441.84	467.862	464.023	503.229	559.736
tr|Q5U4I5|Q5U4I5_XENLA	dnpep.S	Aspartyl aminopeptidase OS=Xenopus laevis OX=8355 GN=dnpep.S PE=1 SV=1	1388	8	C	UR	777.14	753.681	715.859	872.617	960.516	1003.76
tr|Q6GQ61|Q6GQ61_XENLA	dnpep.L	Aspartyl aminopeptidase OS=Xenopus laevis OX=8355 GN=dnpep.L PE=1 SV=1	1388	5	C	UR	587.152	469.289	441.194	519.098	501.765	579.794
sp|Q7ZXB5|RBM22_XENLA	rbm22	Pre-mRNA-splicing factor RBM22 OS=Xenopus laevis OX=8355 GN=rbm22 PE=2 SV=1	1389	2	C	UR	464.14	472.999	320.716	292.528	125.996	135.597
sp|Q6PI79|H33_XENLA		Histone H3.3 OS=Xenopus laevis OX=8355 PE=1 SV=3	1390	2	C	UR	542.611	829.931	1198.24	1875.49	1370.13	2301.57
sp|P84233|H32_XENLA		Histone H3.2 OS=Xenopus laevis OX=8355 PE=1 SV=2	1390	1	C	UR	170.942	276.854	396.904	654.04	453.975	754.421
tr|A0A1L8GKY1|A0A1L8GKY1_XENLA	XELAEV_18022671mg	Lysine--tRNA ligase OS=Xenopus laevis OX=8355 GN=XELAEV_18022671mg PE=1 SV=1	1391	5	C	UR	549.286	546.386	566.117	669.91	659.873	632.926
tr|A0A1L8GF86|A0A1L8GF86_XENLA	kars1.S	Lysine--tRNA ligase OS=Xenopus laevis OX=8355 GN=kars1.S PE=3 SV=1	1391	14	C	UR	2634.88	2478.31	2483.61	3114.34	2766.25	2426.06
tr|A0A1L8HZX9|A0A1L8HZX9_XENLA	XELAEV_18007470mg	BTB domain-containing protein OS=Xenopus laevis OX=8355 GN=XELAEV_18007470mg PE=4 SV=1	1392	2	C	UR	229.568	154.739	113.691	117.977	88.6597	88.8458
tr|A0A1L8EKI7|A0A1L8EKI7_XENLA	kif3b.S	Kinesin-like protein OS=Xenopus laevis OX=8355 GN=kif3b.S PE=3 SV=1	1393	5	C	UR	603.935	625.31	635.982	570.657	466.654	506.09
tr|A0A1L8HPJ8|A0A1L8HPJ8_XENLA	XELAEV_18010209mg	NEDD8 OS=Xenopus laevis OX=8355 GN=XELAEV_18010209mg PE=3 SV=1	1394	2	C	UR	178.612	170.629	164.159	205.767	221.594	253.393
tr|A0A1L8EX65|A0A1L8EX65_XENLA	XB5885669.L	Methyltransf_11 domain-containing protein OS=Xenopus laevis OX=8355 GN=XB5885669.L PE=4 SV=1	1396	2	C	UR	142.954	127.898	151.026	180.405	168.231	188.889
sp|Q6GQD0|NBP1B_XENLA	ncbp1-b	Nuclear cap-binding protein subunit 1-B OS=Xenopus laevis OX=8355 GN=ncbp1-b PE=2 SV=1	1397	2	C	UR	528.469	489.974	398.572	477.195	470.862	439.148
tr|A0A1L8HX88|A0A1L8HX88_XENLA	XELAEV_18006488mg	Uncharacterized protein OS=Xenopus laevis OX=8355 GN=XELAEV_18006488mg PE=3 SV=1	1398	9	C	UR	782.25	939.575	966.024	942.729	1171.8	1240.26
tr|A0A1L8EZX7|A0A1L8EZX7_XENLA	exoc5.S	Exocyst complex component 5 OS=Xenopus laevis OX=8355 GN=exoc5.S PE=1 SV=1	1399	2	C	UR	118.784	94.6254	77.9537	61.2099	59.6746	63.9335
tr|Q498F9|Q498F9_XENLA	cwf19l2.L	MGC115403 protein OS=Xenopus laevis OX=8355 GN=cwf19l2.L PE=2 SV=1	1400	4	C	UR	896.227	717.043	626.089	628.037	648.405	563.055
tr|Q6AZV2|Q6AZV2_XENLA	gcdh.L	Gcdh-prov protein OS=Xenopus laevis OX=8355 GN=gcdh.L PE=1 SV=1	1401	2	C	UR	267.404	232.428	306.947	318.878	260.998	230.9
tr|A0A1L8HH71|A0A1L8HH71_XENLA	XELAEV_18013111mg	Propanoyl-CoA:carbon dioxide ligase subunit alpha OS=Xenopus laevis OX=8355 GN=XELAEV_18013111mg PE=1 SV=1	1402	2	C	UR	330.743	340.562	269.191	308.95	334.359	357.203
tr|A0A1L8GLK0|A0A1L8GLK0_XENLA	XELAEV_18022865mg	PH domain-containing protein OS=Xenopus laevis OX=8355 GN=XELAEV_18022865mg PE=4 SV=1	1403	2	C	UR	163.95	247.868	214.43	223.995	205.899	257.655
tr|A0A1L8GAT4|A0A1L8GAT4_XENLA	ift80.L	WD_REPEATS_REGION domain-containing protein OS=Xenopus laevis OX=8355 GN=ift80.L PE=1 SV=1	1404	1	C	UR	67.7548	59.9202	48.1219	55.1398	50.9109	59.1835
tr|A0A1L8HWX4|A0A1L8HWX4_XENLA	safb.L	Uncharacterized protein OS=Xenopus laevis OX=8355 GN=safb.L PE=1 SV=1	1405	2	C	UR	386.048	494.268	332.289	275.15	240.654	246.838
tr|A0A1L8HNK7|A0A1L8HNK7_XENLA	safb.S	Uncharacterized protein OS=Xenopus laevis OX=8355 GN=safb.S PE=4 SV=1	1405	2	C	UR	319.265	217.226	108.465	123.635	107.582	111.21
sp|A5D8N2|DPCD_XENLA	dpcd	Protein DPCD OS=Xenopus laevis OX=8355 GN=dpcd PE=2 SV=1	1406	4	C	UR	1233.27	928.179	928.494	1193.64	708.209	665.553
tr|A0A1L8HIN4|A0A1L8HIN4_XENLA	XELAEV_18013645mg	LIM zinc-binding domain-containing protein OS=Xenopus laevis OX=8355 GN=XELAEV_18013645mg PE=4 SV=1	1407	6	C	UR	868.055	770.32	704.601	745.844	921.419	936.712
tr|Q6IRP2|Q6IRP2_XENLA	nans.S	MGC83164 protein OS=Xenopus laevis OX=8355 GN=nans.S PE=2 SV=1	1408	8	C	UR	312.707	302.192	592.75	680.098	705.01	632.177
tr|Q66KH0|Q66KH0_XENLA	nans.L	MGC84329 protein OS=Xenopus laevis OX=8355 GN=nans.L PE=1 SV=1	1408	4	C	UR	174.023	175.932	232.712	246.779	298.531	279.112
tr|A0A1L8GFH9|A0A1L8GFH9_XENLA	XELAEV_18025048mg	Glyco_18 domain-containing protein OS=Xenopus laevis OX=8355 GN=XELAEV_18025048mg PE=1 SV=1	1409	8	C	UR	794.523	888.854	858.745	969.532	1218.65	1305.08
sp|Q05AY2|EI3EA_XENLA	eif3e-a	Eukaryotic translation initiation factor 3 subunit E-A OS=Xenopus laevis OX=8355 GN=eif3e-a PE=2 SV=1	1410	6	C	UR	879.937	1310.48	1251.59	1580.83	1402.82	1465.75
tr|A0A1L8FJU1|A0A1L8FJU1_XENLA	XELAEV_18034826mg	J domain-containing protein OS=Xenopus laevis OX=8355 GN=XELAEV_18034826mg PE=1 SV=1	1411	2	C	UR	450.525	434.957	436.991	424.253	477.657	384.54
sp|Q5PQA5|ISOC1_XENLA	isoc1	Isochorismatase domain-containing protein 1 OS=Xenopus laevis OX=8355 GN=isoc1 PE=2 SV=1	1412	5	C	UR	498.52	544.68	734.583	664.077	540.035	513.94
tr|Q68F26|Q68F26_XENLA	upb1.S	MGC82230 protein OS=Xenopus laevis OX=8355 GN=upb1.S PE=2 SV=1	1413	2	C	UR	165.682	154.469	135.587	139.971	161.888	168.779
tr|A0A1L8G117|A0A1L8G117_XENLA	capn2.S	Calcium-activated neutral proteinase 2 OS=Xenopus laevis OX=8355 GN=capn2.S PE=3 SV=1	1414	4	C	UR	430.726	440.737	458.432	478.047	541.425	606.911
tr|A0A1L8G6L2|A0A1L8G6L2_XENLA	XELAEV_18026270mg	Calcium-activated neutral proteinase 2 OS=Xenopus laevis OX=8355 GN=XELAEV_18026270mg PE=1 SV=1	1414	2	C	UR	147.818	173.921	278.925	281.02	278.67	249.919
tr|A0A1L8FVT7|A0A1L8FVT7_XENLA	vps50.L	Uncharacterized protein OS=Xenopus laevis OX=8355 GN=vps50.L PE=1 SV=1	1415	3	C	UR	286.142	317.261	200.467	200.365	162.339	162.409
tr|A0A1L8HFY0|A0A1L8HFY0_XENLA	lypla2.L	Abhydrolase_2 domain-containing protein OS=Xenopus laevis OX=8355 GN=lypla2.L PE=3 SV=1	1416	3	C	UR	423.204	351.488	366.574	378.423	434.934	431.049
tr|Q7ZXQ6|Q7ZXQ6_XENLA	lypla2.S	MGC52664 protein OS=Xenopus laevis OX=8355 GN=lypla2.S PE=2 SV=1	1416	10	C	UR	826.578	858.496	955.307	1133.3	1105.07	1246.46
tr|Q9DDL0|Q9DDL0_XENLA	dync1li1.S	Dynein light intermediate chain OS=Xenopus laevis OX=8355 GN=dync1li1.S PE=2 SV=1	1418	8	C	UR	829.485	775.65	938.942	1045.89	998.302	921.018
tr|Q7ZXE7|Q7ZXE7_XENLA	dync1li1.L	Dynein light intermediate chain OS=Xenopus laevis OX=8355 GN=dync1li1.L PE=1 SV=1	1418	4	C	UR	428.734	334.117	388.69	346.009	450.242	387.029
tr|A0A1L8GEJ7|A0A1L8GEJ7_XENLA	XELAEV_18024790mg	Uncharacterized protein OS=Xenopus laevis OX=8355 GN=XELAEV_18024790mg PE=1 SV=1	1419	3	C	UR	504.125	448.318	317.813	321.584	264.891	249.086
tr|A0A1L8FPI2|A0A1L8FPI2_XENLA	haus5.L	Uncharacterized protein OS=Xenopus laevis OX=8355 GN=haus5.L PE=1 SV=1	1420	4	C	UR	805.766	564.216	465.621	489.259	361.978	336.128
tr|A0A1L8HRB9|A0A1L8HRB9_XENLA	rasa1.S	Uncharacterized protein OS=Xenopus laevis OX=8355 GN=rasa1.S PE=1 SV=1	1422	6	C	UR	559.318	547.249	565.953	682.624	697.917	712.154
tr|A0A1L8GAQ6|A0A1L8GAQ6_XENLA	ppp1r7.L	Protein phosphatase 1 regulatory subunit 22 OS=Xenopus laevis OX=8355 GN=ppp1r7.L PE=1 SV=1	1423	8	C	UR	741.632	784.78	795.246	895.375	885.094	1066.21
tr|Q76EZ1|Q76EZ1_XENLA	ube2e3.S	Ubiquitin conjugating enzyme E2 OS=Xenopus laevis OX=8355 GN=ube2e3.S PE=2 SV=1	1425	1	C	UR	78.4368	63.6927	73.8492	69.3582	70.9057	77.2146
tr|A0A1L8FF12|A0A1L8FF12_XENLA	ecd.S	Uncharacterized protein OS=Xenopus laevis OX=8355 GN=ecd.S PE=1 SV=1	1427	4	C	UR	600.128	533.117	531.711	576.564	596.977	602.102
sp|Q6DDI6|TBC31_XENLA	tbc1d31	TBC1 domain family member 31 OS=Xenopus laevis OX=8355 GN=tbc1d31 PE=2 SV=1	1428	1	C	UR	147.388	129.517	156.192	164.831	104.976	51.9853
tr|A0A1L8FA40|A0A1L8FA40_XENLA	XELAEV_18039747mg	Uncharacterized protein OS=Xenopus laevis OX=8355 GN=XELAEV_18039747mg PE=4 SV=1	1429	5	C	UR	449.307	620.811	696.2	564.537	568.962	660.811
tr|A0A1L8F002|A0A1L8F002_XENLA	XELAEV_18041159mg	Apoptosis regulatory protein Siva OS=Xenopus laevis OX=8355 GN=XELAEV_18041159mg PE=1 SV=1	1429	2	C	UR	145.518	200.95	276.291	187.252	206.483	194.66
tr|A0A1L8FNN9|A0A1L8FNN9_XENLA	XB5850668.L	Sulfotransferase OS=Xenopus laevis OX=8355 GN=XB5850668.L PE=3 SV=1	1430	6	C	UR	698.114	637.64	1053.84	1153.6	1108.29	978.625
sp|A8DZJ1|BAZ1B_XENLA	baz1b	Tyrosine-protein kinase BAZ1B OS=Xenopus laevis OX=8355 GN=baz1b PE=2 SV=2	1431	1	C	UR	45.881	50.2237	43.8299	54.5769	60.31	49.7887
sp|Q05AV1|COMD6_XENLA	commd6	COMM domain-containing protein 6 OS=Xenopus laevis OX=8355 GN=commd6 PE=2 SV=1	1433	2	C	UR	581.01	409.383	402.108	402.56	228.805	234.906
tr|Q91349|Q91349_XENLA	nup62.L	IL4I1 protein OS=Xenopus laevis OX=8355 GN=nup62.L PE=1 SV=1	1434	6	C	UR	491.872	617.382	539.538	489.232	421.127	466.435
tr|Q5XGZ1|Q5XGZ1_XENLA	cpsf3.L	LOC495111 protein OS=Xenopus laevis OX=8355 GN=cpsf3.L PE=1 SV=1	1436	7	C	UR	866.773	710.322	1125.02	1037.46	525.349	567.243
tr|A0A1L8HKJ7|A0A1L8HKJ7_XENLA	XELAEV_18008801mg	U-box domain-containing protein OS=Xenopus laevis OX=8355 GN=XELAEV_18008801mg PE=1 SV=1	1438	2	C	UR	276.364	552.819	306.932	214.522	140.921	153.775
tr|A0A1L8FFV6|A0A1L8FFV6_XENLA	XELAEV_18037389mg	SGNH_hydro domain-containing protein OS=Xenopus laevis OX=8355 GN=XELAEV_18037389mg PE=1 SV=1	1439	1	C	UR	38.0449	29.4665	36.6076	34.8776	35.7774	44.0204
tr|A0A1L8GL91|A0A1L8GL91_XENLA	XELAEV_18022758mg	Uncharacterized protein OS=Xenopus laevis OX=8355 GN=XELAEV_18022758mg PE=4 SV=1	1440	1	C	UR	254.441	263.973	241.778	263.664	271.301	234.402
tr|A0A1L8EKV1|A0A1L8EKV1_XENLA	XELAEV_18045974mg	Pyridoxal 5'-phosphate synthase OS=Xenopus laevis OX=8355 GN=XELAEV_18045974mg PE=1 SV=1	1441	3	C	UR	390.998	519.007	562.546	731.622	750.275	798.706
tr|Q0IH25|Q0IH25_XENLA	ndc80.L	Kinetochore protein Hec1 OS=Xenopus laevis OX=8355 GN=ndc80.L PE=2 SV=1	1442	3	C	UR	530.082	437.154	321.326	285.76	315.313	295.871
sp|Q6DKE0|DHDH_XENLA	dhdh	Trans-1,2-dihydrobenzene-1,2-diol dehydrogenase OS=Xenopus laevis OX=8355 GN=dhdh PE=2 SV=1	1445	3	C	UR	386.194	428.84	472.782	656.466	452.561	722.11
tr|A0A1L8HTP6|A0A1L8HTP6_XENLA	fryl.L	Uncharacterized protein OS=Xenopus laevis OX=8355 GN=fryl.L PE=4 SV=1	1446	1	C	UR	73.7099	124.565	119.809	91.7263	78.179	97.0358
sp|Q4V7Z0|GPN3_XENLA	gpn3	GPN-loop GTPase 3 OS=Xenopus laevis OX=8355 GN=gpn3 PE=2 SV=1	1447	2	C	UR	210.419	179.611	166.941	201.68	122.069	137.408
tr|A0A1L8H306|A0A1L8H306_XENLA	XELAEV_18019093mg	Alpha-mannosidase OS=Xenopus laevis OX=8355 GN=XELAEV_18019093mg PE=1 SV=1	1448	3	C	UR	394.436	379.235	334.286	411.429	468.002	515.161
tr|Q5PPX3|Q5PPX3_XENLA	ap3m2.S	LOC496052 protein OS=Xenopus laevis OX=8355 GN=ap3m2.S PE=2 SV=1	1449	2	C	UR	279.562	358.966	318.81	326.914	247.554	273.406
sp|Q6P7H4|NIPA_XENLA	zc3hc1	NIPA-like protein OS=Xenopus laevis OX=8355 GN=zc3hc1 PE=2 SV=1	1450	4	C	UR	659.535	625.269	662.839	609.735	743.057	734.41
tr|A0A1L8F7F0|A0A1L8F7F0_XENLA	alg13.L	Ubiquitinyl hydrolase 1 OS=Xenopus laevis OX=8355 GN=alg13.L PE=1 SV=1	1451	3	C	UR	250.108	455.72	246.619	183.124	216.717	242.564
tr|A0A1L8GRZ7|A0A1L8GRZ7_XENLA	mat2a.S	S-adenosylmethionine synthase OS=Xenopus laevis OX=8355 GN=mat2a.S PE=3 SV=1	1452	5	C	UR	1269.4	944.102	584.128	684.299	707.312	809.708
tr|A0A1L8H9I4|A0A1L8H9I4_XENLA	pibf1.S	Uncharacterized protein OS=Xenopus laevis OX=8355 GN=pibf1.S PE=4 SV=1	1454	1	C	UR	134.631	189.15	141.823	168.442	142.888	162.267
tr|A0A1L8ENH8|A0A1L8ENH8_XENLA	snx4.S	PX domain-containing protein OS=Xenopus laevis OX=8355 GN=snx4.S PE=3 SV=1	1455	1	C	UR	37.3969	47.7728	41.6149	58.6923	49.2134	52.8799
tr|Q0P3R1|Q0P3R1_XENLA	rbbp9.L	Uncharacterized protein OS=Xenopus laevis OX=8355 GN=rbbp9.L PE=1 SV=1	1456	1	C	UR	114.499	119.863	134.951	126.564	142.453	167.815
tr|A0A1L8GMU2|A0A1L8GMU2_XENLA	XELAEV_18023317mg	GCS light chain OS=Xenopus laevis OX=8355 GN=XELAEV_18023317mg PE=1 SV=1	1457	2	C	UR	185.067	191.85	195.438	214.814	219.134	355.068
tr|A0A1L8ETF2|A0A1L8ETF2_XENLA	faap100.L	Uncharacterized protein OS=Xenopus laevis OX=8355 GN=faap100.L PE=1 SV=1	1458	2	C	UR	219.543	232.629	115.87	109.605	130.553	117.219
tr|A0A1L8F376|A0A1L8F376_XENLA	klhl13.S	BTB domain-containing protein OS=Xenopus laevis OX=8355 GN=klhl13.S PE=4 SV=1	1459	9	C	UR	1241.73	892.251	863.364	729.901	1010.27	729.192
tr|A0A1L8F7W1|A0A1L8F7W1_XENLA	XELAEV_18038984mg	BTB domain-containing protein OS=Xenopus laevis OX=8355 GN=XELAEV_18038984mg PE=4 SV=1	1459	1	C	UR	54.5044	45.0956	59.015	51.8937	59.5948	60.6425
tr|Q3C2L7|Q3C2L7_XENLA	phr.L	DNA photolyase OS=Xenopus laevis OX=8355 GN=phr.L PE=2 SV=1	1461	6	C	UR	553.433	399.931	374.898	378.089	339.766	349.697
sp|Q6PA41|SYCM_XENLA	cars2	Probable cysteine--tRNA ligase, mitochondrial OS=Xenopus laevis OX=8355 GN=cars2 PE=2 SV=1	1462	1	C	UR	206.16	172.46	184.196	219.309	148.366	142.17
tr|Q7ZY43|Q7ZY43_XENLA	rangap1.L	Rangap1-prov protein OS=Xenopus laevis OX=8355 GN=rangap1.L PE=1 SV=1	1463	7	C	UR	566.651	1089.58	1414.86	1177.42	631.591	752.233
tr|A0A1L8HI37|A0A1L8HI37_XENLA	XELAEV_18013450mg	STAS domain-containing protein OS=Xenopus laevis OX=8355 GN=XELAEV_18013450mg PE=3 SV=1	1464	1	C	UR	185.67	204.714	202.959	232.154	261.917	326.65
tr|B7ZS90|B7ZS90_XENLA		Uncharacterized protein OS=Xenopus laevis OX=8355 PE=2 SV=1	1465	5	C	UR	331.731	334.025	371.805	358.726	254.207	257.041
tr|A0A1L8GP12|A0A1L8GP12_XENLA	atrip.L	Uncharacterized protein OS=Xenopus laevis OX=8355 GN=atrip.L PE=1 SV=1	1465	4	C	UR	701.981	610.32	655.827	584.006	410.283	329.781
tr|A0A1L8GJX8|A0A1L8GJX8_XENLA	XELAEV_18022296mg	Uncharacterized protein OS=Xenopus laevis OX=8355 GN=XELAEV_18022296mg PE=3 SV=1	1466	1	C	UR	340.877	271.83	69.3227	98.2493	141.08	104.55
tr|A0A1L8HG06|A0A1L8HG06_XENLA	XELAEV_18012705mg	HTH_Tnp_Tc3_2 domain-containing protein OS=Xenopus laevis OX=8355 GN=XELAEV_18012705mg PE=1 SV=1	1467	1	C	UR	125.977	64.5821	59.4863	53.0326	84.1612	67.818
sp|Q5U247|EXOC8_XENLA	exoc8	Exocyst complex component 8 OS=Xenopus laevis OX=8355 GN=exoc8 PE=2 SV=1	1468	3	C	UR	327.159	293.92	188.532	195.589	211.341	211.769
tr|A0A1L8HUP6|A0A1L8HUP6_XENLA	bbs7.L	Bardet-Biedl syndrome 7 protein homolog OS=Xenopus laevis OX=8355 GN=bbs7.L PE=1 SV=1	1469	3	C	UR	467.907	400.466	314.764	273.79	241.263	289.87
tr|Q7ZWL0|Q7ZWL0_XENLA	nup155.L	Nup155-prov protein OS=Xenopus laevis OX=8355 GN=nup155.L PE=1 SV=1	1470	10	C	UR	1304.12	1247.96	1050.35	926.961	1062.71	1016.78
tr|A0A1L8GJS1|A0A1L8GJS1_XENLA	XELAEV_18022201mg	Peroxiredoxin-5 OS=Xenopus laevis OX=8355 GN=XELAEV_18022201mg PE=1 SV=1	1471	5	C	UR	369.438	365.687	638.815	707.113	567.338	729.754
tr|A0A1L8GCQ9|A0A1L8GCQ9_XENLA	prdx5.S	Peroxiredoxin-5 OS=Xenopus laevis OX=8355 GN=prdx5.S PE=3 SV=1	1471	3	C	UR	309.68	290.214	352.484	390.924	312.816	364.696
tr|Q8AXK5|Q8AXK5_XENLA	tube1.L	Epsilon-tubulin OS=Xenopus laevis OX=8355 GN=tube1.L PE=2 SV=1	1472	1	C	UR	47.7131	47.5215	46.126	38.2355	27.9537	29.5417
tr|A0A1L8HU26|A0A1L8HU26_XENLA	cep135.L	Uncharacterized protein OS=Xenopus laevis OX=8355 GN=cep135.L PE=1 SV=1	1473	8	C	UR	797.82	748.974	1621.13	1794.23	896.672	759.287
tr|A0A1L8G8L2|A0A1L8G8L2_XENLA	XELAEV_18027049mg	Protein-L-isoaspartate O-methyltransferase OS=Xenopus laevis OX=8355 GN=XELAEV_18027049mg PE=1 SV=1	1475	2	C	UR	400.816	510.788	477.801	588.264	601.828	629.128
tr|A0A1L8GF27|A0A1L8GF27_XENLA	cotl1.S	ADF-H domain-containing protein OS=Xenopus laevis OX=8355 GN=cotl1.S PE=1 SV=1	1476	1	C	UR	162.577	182.817	173.851	265.975	280.543	348.55
tr|A0A1L8F5Q6|A0A1L8F5Q6_XENLA	traf2.L	TNF receptor-associated factor OS=Xenopus laevis OX=8355 GN=traf2.L PE=3 SV=1	1477	1	C	UR	279.32	265.417	189.805	203.478	181.955	169.684
sp|Q6GN29|ATLA2_XENLA	atl2	Atlastin-2 OS=Xenopus laevis OX=8355 GN=atl2 PE=2 SV=1	1478	2	C	UR	205.591	182.596	208.351	206.35	235.14	246.325
tr|Q7ZWZ1|Q7ZWZ1_XENLA	LOC398555	Tetraspanin (Fragment) OS=Xenopus laevis OX=8355 GN=LOC398555 PE=2 SV=1	1479	2	C	UR	313.282	297.473	306.931	354.507	421.708	400.581
tr|Q66IS4|Q66IS4_XENLA	pmm1.L	Phosphomannomutase OS=Xenopus laevis OX=8355 GN=pmm1.L PE=1 SV=1	1480	2	C	UR	387.294	406.212	371.854	379.959	483.746	501.942
sp|Q4KLA0|CCNC_XENLA	ccnc	Cyclin-C OS=Xenopus laevis OX=8355 GN=ccnc PE=2 SV=1	1481	4	C	UR	684.762	530.037	657.088	689.487	724.429	573.391
tr|A0A1L8F0D2|A0A1L8F0D2_XENLA	XELAEV_18041266mg	Protein-histidine N-methyltransferase OS=Xenopus laevis OX=8355 GN=XELAEV_18041266mg PE=1 SV=1	1482	3	C	UR	206.58	282.666	305.031	333.887	389.093	413.057
tr|A0A1L8HW57|A0A1L8HW57_XENLA	XELAEV_18006059mg	DNA-directed RNA polymerase subunit beta OS=Xenopus laevis OX=8355 GN=XELAEV_18006059mg PE=1 SV=1	1483	9	C	UR	1165.5	1346.29	1176.18	1252.18	1002.88	1065.69
tr|A0A1L8I1Q4|A0A1L8I1Q4_XENLA	cep120.L	Uncharacterized protein OS=Xenopus laevis OX=8355 GN=cep120.L PE=4 SV=1	1484	1	C	UR	46.42	44.6097	32.0763	37.7599	29.6538	27.2731
tr|A0A1L8F231|A0A1L8F231_XENLA	pdcl.S	Phosducin domain-containing protein OS=Xenopus laevis OX=8355 GN=pdcl.S PE=1 SV=1	1485	1	C	UR	188.599	128.647	140.729	141.145	190.933	192.345
tr|A0A1L8FES6|A0A1L8FES6_XENLA	kifbp.S	KIF-binding protein OS=Xenopus laevis OX=8355 GN=kifbp.S PE=1 SV=1	1486	1	C	UR	74.6608	119.857	110.651	125.72	136.379	101.746
tr|A0A1L8EQ87|A0A1L8EQ87_XENLA	parn.S	Poly(A)-specific ribonuclease PARN OS=Xenopus laevis OX=8355 GN=parn.S PE=3 SV=1	1487	1	C	UR	76.9198	57.4999	88.495	78.4272	58.6242	54.9098
sp|Q90ZA1|PARN_XENLA	parn	Poly(A)-specific ribonuclease PARN OS=Xenopus laevis OX=8355 GN=parn PE=1 SV=1	1487	6	C	UR	722.357	719.628	848.045	782.059	672.553	706.268
tr|A0A1L8GAL1|A0A1L8GAL1_XENLA	xrn1.L	5'-3' exoribonuclease 1 OS=Xenopus laevis OX=8355 GN=xrn1.L PE=1 SV=1	1488	16	C	UR	4370.49	4117.73	2352.06	2242.66	1607.32	1519.61
tr|A0A1L8FTP4|A0A1L8FTP4_XENLA	ubr5.S	Uncharacterized protein OS=Xenopus laevis OX=8355 GN=ubr5.S PE=1 SV=1	1489	7	C	UR	966.961	929.05	771.561	754.302	769.558	847.518
tr|A0A1L8F1A4|A0A1L8F1A4_XENLA	tsc1.S	Uncharacterized protein OS=Xenopus laevis OX=8355 GN=tsc1.S PE=1 SV=1	1490	3	C	UR	259.054	313.101	401.818	378.012	281.97	346.747
tr|A0A1L8HI43|A0A1L8HI43_XENLA	pip4k2c.L	PIPK domain-containing protein OS=Xenopus laevis OX=8355 GN=pip4k2c.L PE=1 SV=1	1491	4	C	UR	540.614	502.318	549.149	738.501	752.937	750.208
tr|Q7ZYI5|Q7ZYI5_XENLA	actl6a.S	Baf53a-pending-prov protein OS=Xenopus laevis OX=8355 GN=actl6a.S PE=1 SV=1	1492	3	C	UR	460.221	365.711	430.467	427.697	427.423	457.57
tr|A0A1L8FWE4|A0A1L8FWE4_XENLA	stt3b.L	Dolichyl-diphosphooligosaccharide--protein glycotransferase OS=Xenopus laevis OX=8355 GN=stt3b.L PE=3 SV=1	1493	2	C	UR	601.628	516.424	541.953	559.708	643.708	693.052
tr|A0A1L8FQH6|A0A1L8FQH6_XENLA	XELAEV_18032813mg	Uncharacterized protein OS=Xenopus laevis OX=8355 GN=XELAEV_18032813mg PE=4 SV=1	1494	5	C	UR	1094.72	1279.04	1171.73	1258.72	1447.29	1669.05
tr|A0A310U8E7|A0A310U8E7_XENLA	XELAEV_18000136mg	Uncharacterized protein OS=Xenopus laevis OX=8355 GN=XELAEV_18000136mg PE=1 SV=1	1495	1	C	UR	36.1501	38.9054	48.5082	41.7489	58.3	61.7294
tr|Q6DDT8|Q6DDT8_XENLA	POLD3	DNA polymerase delta subunit 3 (Fragment) OS=Xenopus laevis OX=8355 GN=POLD3 PE=2 SV=1	1496	2	C	UR	438.466	461.228	400.359	351.182	225.342	360.801
tr|A0A1L8ETF4|A0A1L8ETF4_XENLA	XELAEV_18043651mg	Protein kinase domain-containing protein OS=Xenopus laevis OX=8355 GN=XELAEV_18043651mg PE=3 SV=1	1497	11	C	UR	1392.12	1106.04	1046.91	941.116	1039.96	959.337
tr|Q6DD18|Q6DD18_XENLA	nars1.L	Asparagine--tRNA ligase OS=Xenopus laevis OX=8355 GN=nars1.L PE=2 SV=1	1498	5	C	UR	458.643	427.991	428.854	483.025	527.974	527.769
tr|A0A1L8G1E7|A0A1L8G1E7_XENLA	XELAEV_18028769mg	Thyroglobulin type-1 domain-containing protein OS=Xenopus laevis OX=8355 GN=XELAEV_18028769mg PE=1 SV=1	1499	4	C	UR	348.89	348.022	364.205	354.78	638.631	507.063
tr|I6N3H5|I6N3H5_XENLA	rif1.S	Rif1 protein OS=Xenopus laevis OX=8355 GN=rif1.S PE=2 SV=1	1500	11	C	UR	843.881	1181.3	1706.63	1414.95	1295.81	1494.81
tr|A0A1L8GQ52|A0A1L8GQ52_XENLA	XELAEV_18024130mg	Uncharacterized protein OS=Xenopus laevis OX=8355 GN=XELAEV_18024130mg PE=4 SV=1	1501	2	C	UR	112.651	94.3207	96.6451	56.0921	89.3718	87.1344
sp|Q6PB03|PLD3_XENLA	pld3	5'-3' exonuclease PLD3 OS=Xenopus laevis OX=8355 GN=pld3 PE=2 SV=1	1502	4	C	UR	376.522	377.672	354.028	367.972	514.519	492.107
tr|A0A1L8GT89|A0A1L8GT89_XENLA	znf609.S	C2H2-type domain-containing protein OS=Xenopus laevis OX=8355 GN=znf609.S PE=1 SV=1	1503	5	C	UR	967.403	863.259	494.021	421.839	439.352	415.691
tr|A0A1L8GV76|A0A1L8GV76_XENLA	XELAEV_18021441mg	Uncharacterized protein OS=Xenopus laevis OX=8355 GN=XELAEV_18021441mg PE=1 SV=1	1504	1	C	UR	245.926	217.912	248.594	167.862	219.226	187.48
tr|A0A1L8GXN8|A0A1L8GXN8_XENLA	XELAEV_18017214mg	Uncharacterized protein OS=Xenopus laevis OX=8355 GN=XELAEV_18017214mg PE=4 SV=1	1504	4	C	UR	363.287	403.765	467.949	431.573	411.749	405.332
tr|Q7SYW1|Q7SYW1_XENLA	necap1.L	MGC64450 protein OS=Xenopus laevis OX=8355 GN=necap1.L PE=2 SV=1	1505	4	C	UR	359.66	385.788	546.055	484.692	649.857	569.622
tr|Q6AX72|Q6AX72_XENLA	necap2.L	MGC83534 protein OS=Xenopus laevis OX=8355 GN=necap2.L PE=2 SV=1	1505	1	C	UR	105.983	94.4369	62.4976	86.634	81.8587	85.0468
tr|Q6GQA0|Q6GQA0_XENLA	necap1.S	MGC80231 protein OS=Xenopus laevis OX=8355 GN=necap1.S PE=2 SV=1	1505	4	C	UR	916.117	889.994	944.494	891.473	1169.61	1070.42
sp|Q4V847|INT8_XENLA	ints8	Integrator complex subunit 8 OS=Xenopus laevis OX=8355 GN=ints8 PE=2 SV=1	1506	4	C	UR	370.193	439.538	348.593	324.278	227.838	231.4
tr|A0A1L8FNK2|A0A1L8FNK2_XENLA	XELAEV_18036139mg	Fes1 domain-containing protein OS=Xenopus laevis OX=8355 GN=XELAEV_18036139mg PE=1 SV=1	1507	1	C	UR	46.7562	41.8935	35.7354	41.2441	46.0263	58.1701
[truncated: 843 more rows]
