# Supplementary material for: The conserved centrosomin motif, γTuNA, forms a dimer that directly activates microtubule nucleation by the γ-tubulin ring complex (γTuRC)
Source: eLife journal article supplement (doi:10.7554/elife.80053), 2022-12-14
Supplement: fig4-data1 [file Figure 4 - Source Data 1.xlsx]

## Sheet: Figure 4B
Raw Counts			Averaged by conditions in each set			Averaged by conditions in each set (dataset 2 has an internal replicate)			Fold-change relative to buffer level			Fold-change relative to wildtype's activation effect				Combined average fold-changes across all experiments
Dataset ID: Condition	# EB1 spots		Dataset ID: Condition	Mean		Dataset ID: Condition	Mean		Dataset ID: Condition	Fold-change		Dataset ID: Condition	Fold-change			Condition	Mean Fold	Std. Dev	SEM
Dataset1: Buffer	61		Dataset1: Buffer	40.75		Dataset1: Buffer	40.75		Dataset1: Buffer	1		Dataset1: Buffer	0.112881			Buffer	0.0835366	0.0436838	0.0252209
Dataset1: Buffer	49		Dataset1: WT	361		Dataset1: WT	361		Dataset1: WT	8.8589		Dataset1: WT	1			Wildtype	1	0	0
Dataset1: Buffer	16		Dataset1: I67A	59.75		Dataset1: I67A	59.75		Dataset1: I67A	1.46626		Dataset1: I67A	0.165512			I67A	0.432113	0.250969	0.144897
Dataset1: Buffer	37		Dataset1: L70A	7		Dataset1: L70A	7		Dataset1: L70A	0.171779		Dataset1: L70A	0.0193906			L70A	0.0353065	0.0402065	0.0232132
Dataset1: WT	462		Dataset1: F75A	29		Dataset1: F75A	29		Dataset1: F75A	0.711656		Dataset1: F75A	0.0803324			F75A	0.147269	0.109439	0.0631849
Dataset1: WT	425		Dataset1: L77A	7.25		Dataset1: L77A	7.25		Dataset1: L77A	0.177914		Dataset1: L77A	0.0200831			L77A	0.074121	0.0486318	0.0280776
Dataset1: WT	252		Dataset2: Buffer	7.25		Dataset2: Buffer	7.25		Dataset2: Buffer	1		Dataset2: Buffer	0.0333333
Dataset1: WT	305		Dataset2: WT	217.5		Dataset2: WT	217.5		Dataset2: WT	30		Dataset2: WT	1
Dataset1: F75A	11		Dataset2: I67A #1	125.5		Dataset2: I67A	144.375		Dataset2: I67A	19.9138		Dataset2: I67A	0.663793
Dataset1: F75A	27		Dataset2: I67A #2	163.25		Dataset2: L70A	17.625		Dataset2: L70A	2.43103		Dataset2: L70A	0.0810345
Dataset1: F75A	57		Dataset2: L70A #1	17		Dataset2: F75A	59.5		Dataset2: F75A	8.2069		Dataset2: F75A	0.273563
Dataset1: F75A	21		Dataset2: L70A #2	18.25		Dataset2: L77A	24.875		Dataset2: L77A	3.43103		Dataset2: L77A	0.114368
Dataset1: I67A	65		Dataset2: F75A	59.5		Dataset3: Buffer	4.75		Dataset3: Buffer	1		Dataset3: Buffer	0.104396
Dataset1: I67A	51		Dataset2: L77A #1	16		Dataset3: WT	45.5		Dataset3: WT	9.57895		Dataset3: WT	1
Dataset1: I67A	53		Dataset2: L77A #2	33.75		Dataset3: I67A	21.25		Dataset3: I67A	4.47368		Dataset3: I67A	0.467033
Dataset1: I67A	70		Dataset3: Buffer	4.75		Dataset3: L70A	0.25		Dataset3: L70A	0.0526316		Dataset3: L70A	0.00549451
Dataset1: L70A	3		Dataset3: WT	45.5		Dataset3: F75A	4		Dataset3: F75A	0.842105		Dataset3: F75A	0.0879121
Dataset1: L70A	5		Dataset3: I67A	21.25		Dataset3: L77A	4		Dataset3: L77A	0.842105		Dataset3: L77A	0.0879121
Dataset1: L70A	6		Dataset3: L70A	0.25
Dataset1: L70A	14		Dataset3: F75A	4
Dataset1: L77A	12		Dataset3: L77A	4
Dataset1: L77A	4
Dataset1: L77A	8
Dataset1: L77A	5
Dataset2: I67A #2	236
Dataset2: I67A #2	117
Dataset2: I67A #2	127
Dataset2: I67A #2	173
Dataset2: L70A #2	19
Dataset2: L70A #2	23
Dataset2: L70A #2	21
Dataset2: L70A #2	10
Dataset2: L77A #2	24
Dataset2: L77A #2	33
Dataset2: L77A #2	26
Dataset2: L77A #2	52
Dataset2: I67A #1	129
Dataset2: I67A #1	90
Dataset2: I67A #1	124
Dataset2: I67A #1	159
Dataset2: L70A #1	9
Dataset2: L70A #1	13
Dataset2: L70A #1	15
Dataset2: L70A #1	31
Dataset2: L77A #1	12
Dataset2: L77A #1	24
Dataset2: L77A #1	16
Dataset2: L77A #1	12
Dataset2: Buffer	15
Dataset2: Buffer	4
Dataset2: Buffer	8
Dataset2: Buffer	2
Dataset2: WT	278
Dataset2: WT	175
Dataset2: WT	221
Dataset2: WT	196
Dataset2: F75A	70
Dataset2: F75A	69
Dataset2: F75A	38
Dataset2: F75A	61
Dataset3: I67A	15
Dataset3: I67A	25
Dataset3: I67A	33
Dataset3: I67A	12
Dataset3: L70A	0
Dataset3: L70A	0
Dataset3: L70A	1
Dataset3: L70A	0
Dataset3: L77A	7
Dataset3: L77A	2
Dataset3: L77A	5
Dataset3: L77A	2
Dataset3: Buffer	2
Dataset3: Buffer	9
Dataset3: Buffer	5
Dataset3: Buffer	3
Dataset3: WT	48
Dataset3: WT	49
Dataset3: WT	26
Dataset3: WT	59
Dataset3: F75A	3
Dataset3: F75A	6
Dataset3: F75A	4
Dataset3: F75A	3
