# Supplementary material for: The conserved centrosomin motif, γTuNA, forms a dimer that directly activates microtubule nucleation by the γ-tubulin ring complex (γTuRC)
Source: eLife journal article supplement (doi:10.7554/elife.80053), 2022-12-14
Supplement: fig5-data1 [file Figure 5 - Source Data 1.xlsx]

## Sheet: Figure 5B-Mass_microtubules
	Buffer							Wildtype									F75A						L77A				Averaged per condition					Standard error per condition					Normalized to buffer endpoint (300 sec)					Normalized error
	Mean intensities measured for each frame using ImageJ, first frame background subtracted for all																										Values calculated in MATLAB					Values calculated in MATLAB					Values calculated in MATLAB					Values calculated in MATLAB
Time (sec)	Dataset 1	Dataset 2	Dataset 3	Dataset 4	Dataset 5	Dataset 6		Dataset 1	Dataset 2	Dataset 3	Dataset 4	Dataset 5	Dataset 6	Dataset 7	Dataset 8		Dataset 1	Dataset 2	Dataset 3	Dataset 4	Dataset 5		Dataset 1	Dataset 2	Dataset 3		Buffer	Wildtype	F75A	L77A		Buffer	Wildtype	F75A	L77A		Buffer	Wildtype	F75A	L77A		Buffer	Wildtype	F75A	L77A
2.02	0	0	0	0	0	0		0	0	0	0	0	0	0	0		0	0	0	0	0		0	0	0		0	0	0	0		0	0	0	0		0	0	0	0		0	0	0	0
4.04	-0.24093	-0.200775	-0.0120465	-0.0481859	-0.172666	-0.0562169		0.0883409	-0.0481859	-0.0803099	-0.0562169	-0.0923564	-0.269038	-0.421627	-0.0923564		-0.252976	-0.244945	-0.0562169	0.032124	0.144558		0	0.0120465	-0.20479		-0.121803	-0.121469	-0.0754913	-0.0642479		0.038636	0.0549202	0.0776497	0.0703572		-0.00488522	-0.0048718	-0.00302777	-0.00257682		0.00154959	0.00220271	0.00311433	0.00282185
6.06	-0.293131	-0.329271	-0.032124	-0.0562169	-0.317224	-0.0200775		-0.196759	0.32124	-0.024093	-0.040155	-0.196759	-0.65051	-0.220852	-0.0803099		-0.562169	-0.421627	-0.100387	0.112434	0.385488		0	0.0441704	-0.20479		-0.174674	-0.136025	-0.117252	-0.0535399		0.0623178	0.0957287	0.172682	0.0766926		-0.00700573	-0.00545561	-0.0047027	-0.00214735		0.00249941	0.00383944	0.00692584	0.00307594
8.08	-0.329271	-0.417611	-0.0522014	0.538076	-0.449735	-0.144558		0.0923564	0.582247	0.0441704	2.82289	0.441704	-0.309193	-0.36541	-0.024093		-0.626417	-0.501937	-0.0803099	0.0602324	0.373441		0.0481859	-0.0200775	-0.128496		-0.14255	0.410584	-0.154998	-0.0334625		0.150145	0.363377	0.183542	0.0514408		-0.00571732	0.0164675	-0.00621658	-0.00134209		0.00602193	0.0145741	0.0073614	0.00206316
10.1	-0.377457	-0.36541	-0.032124	0.5702	-0.421627	-0.104403		0.325255	0.959703	-0.0120465	3.05178	0.646495	3.90306	0.0682634	0.120465		-0.542092	-0.433673	-0.0722789	0.0642479	0.457766		0.0200775	0.252976	-0.12448		-0.121803	1.13287	-0.105206	0.0495244		0.15295	0.530231	0.179652	0.109953		-0.00488522	0.0454366	-0.00421955	0.0019863		0.00613444	0.0212662	0.00720539	0.00440992
12.12	-0.473828	-0.329271	0.016062	0.437689	-0.522014	-0.164635		0.16062	1.35724	0.0361395	3.60591	1.08017	4.10785	0.754913	0.220852		-0.0441704	0.847269	-0.0522014	0.208806	0.429658		0.0722789	0.20479	-0.212821		-0.172666	1.41546	0.277872	0.021416		0.146684	0.559072	0.16803	0.123207		-0.00692521	0.0567706	0.0111448	0.000858941		0.00588312	0.022423	0.00673926	0.00494153
14.14	-0.48989	-0.373441	0.0441704	0.44572	-0.469813	0.947657		0.369426	2.58196	0.0722789	4.42508	1.56604	4.47326	8.38034	0.473828		-0.0602324	0.73082	-0.0803099	0.265023	0.433673		0.0883409	0.289116	-0.0040155		0.0174005	2.79278	0.257795	0.12448		0.23784	1.00809	0.153329	0.0865275		0.000697889	0.112011	0.0103395	0.00499259		0.00953914	0.040432	0.00614963	0.0034704
16.16	-0.345333	-0.289116	0.457766	0.630433	-0.40155	0.863331		0.329271	2.85903	0.313209	5.1559	1.63431	4.91095	8.72567	0.534061		-0.0762944	0.903486	-0.0803099	0.337302	0.534061		0.112434	0.208806	-0.0522014		0.152589	3.0578	0.323649	0.0896794		0.229254	1.0638	0.187591	0.0762004		0.00611995	0.122641	0.0129807	0.00359681		0.0091948	0.0426664	0.0075238	0.00305621
18.18	-0.244945	-0.325255	0.437689	0.783022	-0.441704	0.859316		0.626417	3.73039	0.301162	6.23606	2.37316	5.16393	9.21155	0.582247		2.01979	0.738851	0.164635	0.40958	0.586262		0.100387	0.325255	-0.0762944		0.17802	3.52811	0.783825	0.116449		0.239016	1.12755	0.323429	0.116195		0.00713994	0.141504	0.0314372	0.00467049		0.00958634	0.0452231	0.0129719	0.0046603
20.2	-0.337302	-0.20479	0.453751	1.01994	-0.345333	1.04001		0.73082	5.03543	1.33716	6.98696	2.50165	5.53335	10.1472	0.76696		1.6062	0.89144	0.144558	0.381472	0.987812		0.0602324	0.413596	-0.0602324		0.271046	4.12994	0.802296	0.137865		0.26845	1.19876	0.254788	0.142184		0.010871	0.165641	0.0321781	0.00552943		0.0107668	0.0480793	0.0102189	0.00570262
22.22	-0.341317	-0.0522014	0.48989	1.03198	-0.345333	1.15245		1.07615	5.68594	1.36125	8.08721	2.72251	6.09552	11.5486	0.879393		1.5018	1.06411	0.168651	0.469813	0.995843		0.0803099	0.429658	-0.100387		0.322578	4.68207	0.840042	0.136527		0.273694	1.36329	0.234545	0.155571		0.0129378	0.187786	0.0336919	0.00547575		0.0109772	0.0546783	0.00940703	0.00623957
24.24	-0.357379	1.44558	0.566185	1.08017	-0.148573	1.38133		1.25283	7.01507	1.815	9.05896	3.32885	6.77012	12.3356	1.12434		1.61824	1.39739	0.265023	0.52603	0.951672		0.0883409	0.493906	-0.0642479		0.661218	5.3376	0.951672	0.172666		0.31684	1.45508	0.254523	0.16655		0.0265198	0.214077	0.0381692	0.00692521		0.0127077	0.0583598	0.0102083	0.00667991
26.26	-0.289116	1.44558	0.702712	1.07615	-0.148573	1.61021		1.45361	8.06713	1.82705	10.4604	3.94723	7.03515	13.1066	1.34921		1.71462	1.62628	0.281085	0.554138	1.01994		0.0963719	0.60634	0.0200775		0.732828	5.90579	1.03921	0.24093		0.327507	1.57887	0.283834	0.184028		0.0293919	0.236866	0.0416801	0.00966308		0.0131355	0.0633245	0.0113839	0.00738089
28.28	-0.188728	1.24882	0.610355	1.10426	-0.164635	1.5018		4.68608	8.7337	1.97964	11.0788	4.76238	7.52504	13.1347	1.4255		1.77886	1.85114	0.305178	0.666572	1.23276		0.0923564	0.586262	-0.0040155		0.685311	6.66572	1.1669	0.224868		0.297303	1.48383	0.303308	0.182826		0.0274861	0.267345	0.0468015	0.00901888		0.0119241	0.0595127	0.0121649	0.0073327
30.3	-0.309193	1.40944	0.690665	1.25685	0.0120465	1.87122		4.22029	9.74159	2.29285	12.2312	13.476	7.53708	14.4478	1.49376		1.69052	2.10412	0.357379	0.630433	1.18859		0.16062	0.762944	-0.0040155		0.821838	8.18007	1.19421	0.306516		0.345828	1.80099	0.323452	0.23311		0.0329618	0.328082	0.0478967	0.0122936		0.0138703	0.0722332	0.0129728	0.00934946
32.32	-0.0843254	1.70659	0.722789	1.16449	0.164635	1.66643		4.11187	12.1549	2.81888	13.2953	13.5202	8.11933	15.4677	1.59415		1.97964	2.43741	0.317224	0.642479	1.46164		0.212821	0.722789	-0.0762944		0.890101	8.88529	1.36768	0.286439		0.308136	1.92856	0.397304	0.233594		0.0356997	0.356366	0.0548541	0.0114883		0.0123585	0.0773496	0.0159349	0.00936886
34.34	0.522014	1.77886	0.803099	1.34519	0.252976	1.83107		4.32469	13.7491	3.2646	14.2149	15.2629	8.97062	16.1182	1.6584		1.90736	2.66227	0.373441	0.562169	1.1926		0.156604	0.770975	-0.0803099		1.08887	9.69541	1.33957	0.282423		0.270454	2.0892	0.426104	0.253669		0.0436718	0.388858	0.0537267	0.0113273		0.0108472	0.0837924	0.0170899	0.010174
36.36	0.317224	1.86319	0.807115	1.23276	0.228883	1.90736		5.06755	15.6564	3.31278	15.4998	16.1744	9.23162	17.7565	5.32856		1.91539	2.97548	0.389503	0.702712	1.036		0.188728	0.899471	-0.0281085		1.05942	11.0035	1.40382	0.353364		0.299967	2.0871	0.468375	0.280137		0.0424907	0.441321	0.0563035	0.0141725		0.0120309	0.0837083	0.0187854	0.0112356
38.38	0.256992	1.97562	0.883409	1.35724	0.413596	2.0479		5.63374	16.9133	3.89101	24.627	17.877	9.53279	20.2702	5.09566		1.96759	3.22043	0.457766	0.746882	1.04804		0.256992	0.93561	0.0281085		1.15579	12.9801	1.48814	0.406904		0.313127	2.79947	0.501772	0.272486		0.0463559	0.520598	0.0596856	0.0163199		0.0125587	0.11228	0.0201248	0.0109287
40.4	0.554138	1.92342	0.915533	1.45762	0.437689	2.13223		5.99513	18.3267	4.34878	25.0246	18.921	10.5126	21.3223	5.36069		2.19246	3.07587	0.530045	0.762944	1.2167		0.244945	1.04403	0.104403		1.23677	13.7265	1.5556	0.464459		0.290392	2.87079	0.47496	0.292611		0.0496038	0.550534	0.0623913	0.0186283		0.0116469	0.11514	0.0190494	0.0117359
42.42	0.534061	2.10412	1.07214	1.28094	0.594293	2.18844		6.61352	20.5031	5.00732	26.2413	20.0253	10.9262	22.9767	5.45706		1.92744	3.24452	0.469813	0.807115	1.30905		0.269038	1.0882	0.164635		1.29567	14.7188	1.55159	0.507291		0.292848	3.05529	0.489417	0.292014		0.0519659	0.590334	0.0622302	0.0203462		0.0117454	0.12254	0.0196293	0.0117119
44.44	0.513983	1.93547	1.10025	1.38133	0.574216	2.32096		7.56921	21.8322	5.64579	27.1447	21.2861	11.5486	23.8199	5.91081		1.69052	3.57379	0.509968	0.779006	1.30102		0.281085	1.16048	0.128496		1.30437	15.5947	1.57086	0.523353		0.296488	3.1222	0.540897	0.321594		0.0523148	0.625463	0.0630033	0.0209904		0.0118914	0.125224	0.021694	0.0128983
46.46	0.774991	2.29686	1.34118	1.51384	0.698696	2.32096		7.83022	23.2818	5.9349	28.7349	22.8562	11.6771	25.3739	6.46896		1.70257	3.6541	0.509968	0.831207	1.5018		0.261007	1.23276	0.164635		1.49109	16.5197	1.63993	0.5528		0.288769	3.3421	0.548212	0.341115		0.0598037	0.662565	0.0657734	0.0221714		0.0115818	0.134043	0.0219874	0.0136813
48.48	0.538076	1.98767	1.34519	1.71863	0.722789	2.49764		8.27594	25.5707	6.80225	30.4656	24.9161	12.8134	26.3698	6.88256		1.57407	3.8348	0.513983	0.887424	1.74272		0.305178	1.34118	0.200775		1.46833	17.762	1.7106	0.615709		0.30704	3.53701	0.576255	0.363983		0.0588911	0.71239	0.0686079	0.0246945		0.0123146	0.14186	0.0231121	0.0145984
50.5	0.750898	2.47756	1.28094	1.90334	0.634448	2.81486		8.26389	29.1686	7.42465	31.3771	25.5747	12.7813	28.9919	7.32025		1.63431	4.0958	0.566185	0.831207	1.95956		0.325255	1.46566	0.24093		1.64368	18.8628	1.81741	0.67728		0.368856	3.83556	0.623818	0.394939		0.0659237	0.756539	0.0728918	0.027164		0.0147939	0.153835	0.0250198	0.01584
52.52	0.911517	2.52575	1.3733	2.01578	0.646495	3.29271		7.91053	30.2688	8.67347	33.18	27.3817	14.002	30.3531	8.13539		1.63832	4.19218	0.562169	0.947657	1.81099		0.36541	1.59014	0.449735		1.79426	19.9881	1.83026	0.801761		0.412444	3.99112	0.63257	0.394939		0.0719631	0.801673	0.0734072	0.0321566		0.0165421	0.160074	0.0253708	0.01584
54.54	1.09623	2.77872	1.50983	2.05995	0.754913	3.32885		8.90235	32.8708	9.6131	34.0715	28.9035	15.3633	32.4091	8.40042		1.87524	4.6138	0.630433	1.04001	2.08003		0.437689	1.77886	0.550123		1.92141	21.3168	2.0479	0.922225		0.406041	4.16222	0.694253	0.429547		0.0770631	0.854961	0.0821362	0.0369881		0.0162853	0.166936	0.0278447	0.0172281
56.56	1.09623	2.73455	1.46164	2.08404	0.750898	3.05579		9.23162	34.7541	10.7655	36.268	30.2969	15.6243	32.8628	8.55702		2.75463	4.71018	0.718774	1.10025	2.1764		0.329271	1.93948	0.558154		1.86386	22.295	2.29204	0.942303		0.374923	4.35684	0.706055	0.50295		0.0747547	0.894197	0.0919281	0.0377934		0.0150372	0.174742	0.0283181	0.020172
58.58	1.24079	2.79077	1.83508	2.23262	0.779006	2.96344		10.1753	37.4565	11.408	37.9625	31.1562	17.3469	34.5413	9.59302		2.43339	5.11574	0.907502	1.23276	2.25671		0.493906	2.072	0.674603		1.97362	23.705	2.38922	1.08017		0.351088	4.51024	0.741159	0.498649		0.0791567	0.950746	0.0958255	0.0433228		0.0140813	0.180894	0.029726	0.0199996
60.6	1.22071	3.22444	2.03586	2.48961	0.754913	2.95139		10.2475	39.8578	12.5765	39.8658	32.7584	17.8288	36.9586	10.4162		2.29285	5.3125	0.875378	1.34519	2.36914		0.534061	2.14829	0.682634		2.11282	25.0637	2.43901	1.12166		0.396928	4.7828	0.772159	0.515103		0.0847398	1.00524	0.0978226	0.044987		0.0159198	0.191826	0.0309693	0.0206595
62.62	1.31708	3.14413	2.06798	2.54181	0.76696	3.19633		11.4442	42.3675	13.2792	41.1187	34.983	18.5958	38.9061	11.9381		2.63416	5.37273	0.995843	1.49778	2.39324		0.517999	2.0479	0.678619		2.17238	26.5791	2.57875	1.08151		0.40195	4.94126	0.758878	0.485417		0.0871288	1.06602	0.103427	0.0433765		0.0161212	0.198181	0.0304367	0.0194689
64.64	1.70257	3.65812	2.34906	2.73054	0.931595	3.45734		11.9742	44.3592	13.8735	43.2027	36.5249	19.4912	40.8456	11.155		2.79077	5.28439	1.09221	1.64234	2.60204		0.630433	2.34505	0.68665		2.47154	27.6783	2.68235	1.22071		0.425229	5.25788	0.721075	0.562404		0.0991271	1.11011	0.107582	0.0489596		0.0170549	0.21088	0.0289205	0.0225566
66.66	1.72666	3.58985	2.58999	3.09193	1.06411	3.25255		12.0063	46.6601	14.9256	45.4755	39.3759	20.21	43.279	12.436		2.99154	5.34462	1.12434	1.58612	2.71849		0.642479	2.55385	0.8553		2.55252	29.296	2.75302	1.35054		0.398158	5.56243	0.734464	0.604784		0.102375	1.17499	0.110417	0.0541669		0.0159691	0.223095	0.0294575	0.0242563
68.68	1.89531	3.81472	2.60606	3.22444	0.947657	3.79464		12.2834	48.7642	17.5276	47.8326	40.6448	21.1617	45.4514	12.8938		3.03973	5.50123	1.25685	1.94752	2.6944		0.754913	2.99154	0.887424		2.71381	30.8199	2.88794	1.54463		0.463386	5.75846	0.72231	0.724469		0.108844	1.23611	0.115828	0.0619511		0.0185852	0.230957	0.02897	0.0290566
70.7	1.70257	3.90306	2.61409	3.16421	1.10025	3.74646		13.3314	58.4094	15.9696	49.6355	43.789	22.4386	46.64	13.7812		2.79077	5.50926	1.23276	2.01176	2.7466		0.726805	3.39309	1.07615		2.70511	32.9993	2.85823	1.73202		0.458956	6.52279	0.721236	0.836639		0.108495	1.32352	0.114636	0.0694668		0.0184076	0.261613	0.028927	0.0335555
72.72	1.8391	3.99542	2.66629	3.30074	2.73054	4.12391		13.5965	58.2688	15.9214	50.6715	45.612	23.9163	49.1336	14.3996		3.65812	5.08362	1.40542	2.26474	2.94737		0.76696	3.56978	1.18457		3.10933	33.94	3.07185	1.84044		0.35611	6.62753	0.625892	0.873033		0.124707	1.36125	0.123204	0.0738152		0.0142827	0.265813	0.0251029	0.0350152
74.74	1.90736	4.64191	2.88313	3.57781	2.58196	4.14801		14.1024	58.8953	16.2427	52.093	46.5958	24.9884	49.9247	15.4717		3.4734	5.42092	1.5299	2.17238	3.06382		0.919548	3.90708	1.3733		3.29003	34.7892	3.13209	2.06664		0.417342	6.66834	0.665129	0.929493		0.131955	1.39531	0.12562	0.0828878		0.0167385	0.26745	0.0266766	0.0372796
76.76	2.01979	4.7423	3.01564	3.43726	2.86305	4.55357		14.7489	59.7907	16.3832	53.631	49.0252	26.177	51.2658	16.5398		3.84283	5.81444	1.6584	2.45347	2.98753		0.979781	4.03557	1.44156		3.4386	35.9452	3.35133	2.15231		0.426848	6.80223	0.71109	0.951023		0.137914	1.44167	0.134413	0.0863235		0.0171198	0.27282	0.02852	0.0381431
78.78	2.30088	4.55759	2.95139	3.67819	2.85502	5.06755		15.801	61.5214	17.0418	55.462	51.1373	27.1046	52.9282	17.5598		3.94723	5.50926	1.79493	2.65023	3.03973		1.07615	4.39295	1.62628		3.56844	37.3195	3.38827	2.36513		0.437197	6.96736	0.633086	1.02627		0.143121	1.49679	0.135895	0.0948592		0.0175349	0.279443	0.0253915	0.0411612
80.8	2.42134	4.53349	3.0317	3.77055	2.97147	5.35265		16.4716	64.2078	16.849	56.5703	53.2254	28.3815	54.7192	18.2825		4.02353	5.66185	2.02783	2.95139	3.19633		1.13237	4.98724	1.99169		3.6802	38.5884	3.57218	2.70377		0.448737	7.23632	0.611641	1.16838		0.147604	1.54768	0.143271	0.108441		0.0179977	0.290231	0.0245314	0.0468606
82.82	2.56189	4.54152	3.38105	3.88298	3.36097	5.39683		17.2586	65.0309	17.2706	59.7626	54.5706	28.8955	56.3414	19.2302		4.5094	5.79436	2.30891	2.9273	3.14815		1.25283	5.22416	1.93547		3.85421	39.7951	3.73762	2.80415		0.407847	7.42174	0.627341	1.22594		0.154582	1.59608	0.149907	0.112468		0.0163577	0.297667	0.0251611	0.0491695
84.84	2.39324	5.03945	3.53765	4.18816	3.54167	5.52532		18.0336	66.593	17.7927	60.5376	56.9718	29.6464	56.5743	19.5675		4.70616	5.86262	2.44544	3.12807	3.36498		1.38133	5.36069	2.06396		4.03758	40.7146	3.90146	2.93533		0.463304	7.54512	0.612358	1.22859		0.161937	1.63296	0.156477	0.117729		0.0185819	0.302616	0.0245601	0.0492755		95% Confidence Interval for last timepoint:
86.86	2.55787	5.0274	3.65009	3.88298	3.7585	6.03127		19.0134	67.9823	18.3789	63.3685	57.265	31.3972	57.5581	20.5995		5.20007	5.86664	2.40528	3.37302	3.34491		1.48172	5.68996	2.10412		4.15135	41.9454	4.03798	3.09193		0.493909	7.63391	0.643532	1.31138		0.1665	1.68232	0.161953	0.12401		0.0198094	0.306177	0.0258104	0.0525961			Buffer	Wildtype
88.88	2.7466	5.38879	3.6541	3.93519	3.92715	6.34047		19.8125	70.1507	18.5958	65.2558	59.5377	31.7666	59.1884	22.1173		5.50524	5.90278	2.68637	3.26058	3.68221		1.52187	7.31222	2.18844		4.33205	43.3031	4.20744	3.67418		0.530571	7.86358	0.634214	1.82917		0.173748	1.73678	0.16875	0.147362		0.0212799	0.315388	0.0254367	0.0733633		95CI	0.2799	0.863365
90.9	2.52575	5.94695	3.66615	4.0677	4.12391	6.74202		20.0694	71.5561	19.4631	66.4002	60.5376	32.4171	61.9711	22.7036		5.69397	6.24008	2.98351	3.34892	4.13194		1.47369	7.55716	2.86706		4.51208	44.3898	4.47969	3.96597		0.633528	8.03872	0.640764	1.8401		0.180968	1.78036	0.179669	0.159065		0.0254092	0.322413	0.0256994	0.0738016		Upper bound	1.2799	6.02587
92.92	2.50968	5.97506	3.84684	4.30863	4.49334	7.01105		20.6557	73.1944	19.9891	68.665	62.465	33.3527	63.5332	24.4102		5.68594	7.04719	3.00359	3.63001	4.08777		1.77485	7.6455	2.65023		4.69077	45.7832	4.6909	4.02353		0.65032	8.21186	0.737513	1.82853		0.188135	1.83625	0.18814	0.161373		0.0260827	0.329357	0.0295798	0.0733379		Lower bound	0.7201	4.29914
94.94	2.40127	6.05135	3.95526	4.06368	5.01134	6.86248		21.5351	75.2945	20.2863	70.1668	63.4569	33.5535	64.4085	25.2294		6.33645	7.11144	3.35294	3.60591	4.18415		1.7869	7.78604	3.05579		4.72423	46.7414	4.91818	4.20958		0.654207	8.37458	0.759365	1.82536		0.189477	1.87468	0.197256	0.168835		0.0262386	0.335883	0.0304562	0.0732107
96.96	2.4093	6.38062	4.08376	4.09982	5.31652	7.42867		22.5149	75.8206	21.2781	72.8049	65.3442	34.3365	65.4004	26.2694		6.37661	7.38048	3.41719	3.62198	4.50137		1.75477	8.55702	3.28066		4.95311	47.9711	5.05952	4.53082		0.73605	8.46771	0.780926	2.06073		0.198657	1.924	0.202925	0.18172		0.0295211	0.339618	0.0313209	0.0826506
98.98	2.6703	6.39668	4.02353	4.15202	5.68594	7.29615		23.3862	76.4028	21.3664	75.1179	66.9945	35.2721	66.0509	27.9358		6.75005	8.01091	3.57379	3.6541	4.88284		1.85516	8.75378	3.50553		5.03744	49.0658	5.37434	4.70482		0.702026	8.5559	0.874267	2.07978		0.202039	1.96791	0.215551	0.188698		0.0281565	0.343155	0.0350646	0.0834148		Mean MT mass at 300s (no normalization)
101	2.92328	6.83437	4.3006	4.36886	6.31236	7.73384		24.7475	77.732	22.017	77.226	69.0264	35.9628	66.8781	28.8232		7.12349	8.87023	4.04762	3.7063	5.0796		1.76682	9.31193	3.77858		5.41222	50.3016	5.76545	4.95244		0.747035	8.68363	0.9784	2.25578		0.21707	2.01747	0.231238	0.19863		0.0299617	0.348278	0.0392412	0.0904737			Buffer	Wildtype
103.02	2.71849	7.18774	4.40098	4.50539	6.23205	7.92257		25.7152	77.8564	22.792	79.6915	70.8695	37.7537	67.7294	30.1363		7.56921	9.57696	3.91511	3.5497	4.95111		1.89933	9.88213	4.11187		5.49454	51.568	5.91241	5.29778		0.799727	8.72428	1.15476	2.3795		0.220372	2.06826	0.237132	0.21248		0.032075	0.349909	0.0463147	0.0954358		Mean MT mass	24.933	128.717
105.04	2.83092	7.39253	4.51342	4.49735	6.4529	8.03099		26.5826	78.8563	23.3461	81.896	72.0862	38.36	70.0102	31.7626		8.36428	9.44444	4.28052	3.94723	5.0274		2.01176	10.7896	4.3006		5.61969	52.8625	6.21277	5.70066		0.814703	8.86365	1.1257	2.62887		0.225391	2.12018	0.249179	0.228639		0.0326757	0.355498	0.045149	0.105437		Error (St Dev)	8.72162	31.0641
107.06	3.00761	7.81817	4.46523	4.70214	6.44487	8.51285		27.7631	79.5068	24.2737	83.7231	74.1943	40.1911	70.6607	33.1037		8.73772	9.17139	4.5616	3.98739	5.29242		1.99972	11.5245	4.60979		5.82514	54.1771	6.3501	6.04466		0.868504	8.88273	1.08536	2.84162		0.233632	2.1729	0.254687	0.242436		0.0348335	0.356264	0.0435311	0.11397		SEM	3.90043	10.9828
109.08	2.96745	7.99485	4.7945	4.94709	6.85043	8.56505		29.2649	80.6432	24.5708	84.9398	75.1821	40.0626	71.536	34.6336		9.32398	8.32011	4.71419	4.05967	6.37661		2.17238	11.8578	5.26431		6.0199	55.1041	6.55891	6.43148		0.876318	8.92506	1.01069	2.85618		0.241443	2.21009	0.263061	0.257951		0.0351469	0.357962	0.0405362	0.114554
111.1	3.32885	8.2398	4.80655	5.10771	6.90665	8.93849		29.5701	83.197	25.655	87.0519	76.4269	41.7491	73.327	35.8423		9.87009	8.38034	4.89087	4.30461	5.23219		2.48559	12.2714	5.702		6.22134	56.6024	6.53562	6.81965		0.885721	9.10971	1.09323	2.87965		0.249522	2.27018	0.262127	0.273519		0.035524	0.365367	0.0438468	0.115495		Mean fold-change in MT mass at 300s (normalized to buffer)
113.12	3.32483	8.3964	4.8708	5.441	7.18774	9.04289		31.2406	83.8596	26.1288	88.373	78.1134	42.7449	75.4913	37.0389		10.2797	8.03902	5.42895	4.50539	5.30447		2.5659	12.444	6.12765		6.37728	57.8738	6.7115	7.04586		0.900051	9.16664	1.07205	2.88829		0.255776	2.32117	0.269181	0.282591		0.0360988	0.367651	0.0429971	0.115842			Buffer	Wildtype
115.14	3.28869	8.66142	5.03945	5.6498	7.87037	9.27981		30.9555	84.4378	26.8315	89.7584	80.5227	44.2508	77.8765	38.5728		10.878	8.56104	5.95498	4.85473	5.36069		2.80282	13.3314	6.26016		6.63159	59.1508	7.12188	7.46481		0.954667	9.32417	1.1354	3.09846		0.265976	2.37239	0.285641	0.299394		0.0382893	0.373969	0.0455382	0.124271		Mean MT mass	1	5.1625
117.16	3.26861	8.52088	5.08362	5.88672	8.08319	9.49665		32.7945	86.2046	27.3977	92.8061	82.5224	44.1584	78.1576	40.1228		11.2354	8.75779	6.08348	5.07559	5.40486		2.9795	15.1384	6.60549		6.72328	60.5205	7.31141	8.24113		0.967735	9.49325	1.17539	3.60399		0.269654	2.42733	0.293242	0.330531		0.0388134	0.38075	0.0471421	0.144547		Error (St Dev)	0.349802	1.2459
119.18	3.56978	8.98266	5.47312	5.83451	8.6293	9.39626		33.0837	86.5861	28.6305	95.0869	84.3816	45.6642	79.9726	41.2432		11.0788	9.33201	5.9349	5.17999	5.37675		3.28467	15.4235	6.71391		6.98094	61.8311	7.38048	8.47403		0.962317	9.60871	1.19232	3.613		0.279988	2.47989	0.296012	0.339872		0.0385961	0.385381	0.0478209	0.144908		SEM	0.156436	0.440492
121.2	4.03156	9.32398	5.8305	6.17182	8.72166	10.0146		34.7461	94.8259	29.6143	97.3436	85.9155	46.399	80.2095	42.1426		11.4923	9.37217	6.02324	5.58555	5.65382		3.57379	15.9897	6.81028		7.34903	63.8996	7.62543	8.79126		0.958948	10.0274	1.19623	3.71851		0.294751	2.56285	0.305837	0.352595		0.038461	0.402173	0.0479779	0.14914
123.22	5.04748	10.1953	5.8305	5.88672	9.03085	9.97047		36.8743	92.6174	30.5941	100.363	87.5779	47.4832	81.5266	43.6002		11.4803	9.64923	6.46093	6.04332	5.48517		3.6019	16.9855	6.94681		7.66023	65.0796	7.82379	9.17808		0.948022	9.94245	1.16617	4.02138		0.307232	2.61018	0.313792	0.36811		0.0380228	0.398767	0.046772	0.161287		Student's T-test, two-sample unpaired, unequal variance
125.24	4.05967	10.9342	5.94695	5.92286	9.1473	10.4483		38.3801	88.4332	30.8551	101.929	90.0515	48.4831	84.0363	44.2066		11.6008	9.89418	6.93074	6.30834	5.67791		3.83078	17.6682	7.60535		7.74321	65.7969	8.08239	9.70144		1.14863	9.88997	1.13835	4.12971		0.310561	2.63895	0.324164	0.3891		0.0460684	0.396661	0.0456561	0.165632			Buffer	Wildtype
127.26	3.74646	12.0907	6.28023	6.12363	9.39224	10.376		39.1149	89.4974	31.5297	105.475	91.6738	49.4508	84.6225	45.1824		11.6369	9.67734	6.72997	6.9709	6.15977		3.8348	18.7363	8.44459		8.00154	67.0683	8.23498	10.3386		1.27656	10.1114	1.04458	4.4047		0.320922	2.68994	0.330284	0.414654		0.0511997	0.405543	0.0418955	0.176661		p-value	1	1.22266e-05
129.28	3.67016	15.4476	8.15949	6.42479	9.79379	10.4644		40.0385	89.5817	31.606	106.089	92.9788	49.1858	87.2206	46.1943		11.7012	10.0709	7.35237	7.25198	6.19591		3.96329	19.957	9.24367		8.99337	67.8619	8.51446	11.0547		1.63392	10.217	1.02219	4.70494		0.360701	2.72177	0.341493	0.443374		0.0655326	0.409776	0.0409974	0.188703		Less than p = 0.05?
131.3	3.73039	13.7972	7.08333	6.69383	10.0548	10.8137		40.5123	90.8626	32.0677	109.189	94.5569	51.2016	88.7625	47.3909		11.7413	10.0026	7.68967	7.79408	6.57738		4.22029	20.1578	9.50468		8.69555	69.318	8.76101	11.2942		1.45626	10.4329	0.929373	4.68696		0.348757	2.78017	0.351382	0.452984		0.0584067	0.418437	0.0372748	0.187982		Significant?	FALSE	TRUE
133.32	3.91109	12.4761	6.89862	6.5814	10.625	10.8981		42.0824	92.1837	32.6098	110.916	97.0103	51.4746	88.4132	49.2019		12.1348	9.7175	7.79006	8.03501	6.87854		4.49334	21.2339	10.8659		8.56505	70.4865	8.91119	12.1977		1.33359	10.5103	0.927315	4.87826		0.343523	2.82703	0.357405	0.48922		0.0534871	0.421541	0.0371922	0.195655
135.34	4.05967	12.7452	6.79422	6.93074	10.6933	11.0707		43.1184	93.6895	34.3485	113.281	98.5081	51.4987	89.1801	49.8202		12.8817	9.01077	8.23176	8.56505	7.0753		4.55759	21.5753	11.4482		8.71563	71.6806	9.15292	12.527		1.34475	10.6365	0.985766	4.9421		0.349562	2.87493	0.3671	0.502427		0.0539344	0.426605	0.0395366	0.198215
137.36	3.76653	13.4479	6.57738	6.91468	10.7575	11.5004		43.4035	95.2757	35.3564	114.522	99.0823	52.4424	90.714	51.0289		13.0704	9.4083	8.23578	8.5008	7.3082		4.59774	22.5671	12.1469		8.8274	72.7281	9.30471	13.1039		1.48944	10.7005	0.999158	5.20933		0.354045	2.91694	0.373188	0.525564		0.0597375	0.429172	0.0400737	0.208933
139.38	4.28453	14.0221	6.97893	7.20781	10.894	11.5967		44.4074	97.0385	36.0792	116.698	100.741	53.0487	92.0392	52.077		13.211	9.70545	8.70559	8.86621	7.3082		4.88686	23.3381	13.1387		9.16403	74.0161	9.55929	13.7879		1.47109	10.8789	0.990776	5.33628		0.367546	2.9686	0.383399	0.552997		0.0590016	0.436327	0.0397375	0.214025
141.4	4.36083	13.4559	7.34033	7.19175	11.2474	12.0826		45.9252	98.6206	37.3642	119.148	102.094	54.1369	91.2401	53.8799		13.3596	9.81387	10.5608	9.071	7.20781		5.36069	23.5991	14.5441		9.27981	75.3011	10.0026	14.5013		1.43161	10.8949	1.00735	5.26501		0.37219	3.02014	0.401179	0.58161		0.0574182	0.436968	0.0404022	0.211166
143.42	3.92715	13.4077	7.55716	7.43268	11.8818	12.3476		46.5958	100.982	37.8019	120.095	102.608	54.691	90.967	54.8838		13.729	9.94237	9.25572	9.26776	7.72983		5.36069	24.7756	14.7168		9.42571	76.0781	9.98493	14.951		1.50692	10.9578	1.00377	5.60583		0.378041	3.0513	0.40047	0.599648		0.0604389	0.43949	0.0402589	0.224836
145.44	4.16808	13.745	7.94666	7.46481	12.179	13.0022		47.0375	102.809	37.8099	122.32	103.415	55.8716	90.5052	56.1567		14.3313	9.85001	9.20351	9.38823	7.57724		5.5976	26.2172	15.817		9.75096	76.9906	10.0701	15.8773		1.54993	11.1119	1.13218	5.95243		0.391086	3.0879	0.403885	0.636797		0.062164	0.445672	0.0454088	0.238737
147.46	4.37287	13.3395	8.15949	8.19563	12.1589	13.227		47.431	104.535	40.0626	122.42	103.873	55.6347	92.1516	57.779		14.0382	9.95843	9.64923	9.78175	7.48488		5.75822	27.0765	16.0459		9.9089	77.9859	10.1825	16.2935		1.46612	11.0436	1.06392	6.1553		0.397421	3.12782	0.408394	0.653493		0.0588022	0.442929	0.0426711	0.246873
149.48	5.10771	13.6366	8.5249	8.53694	12.5725	13.6768		48.3988	107.326	41.2672	123.914	106.483	56.7068	93.3643	58.9153		14.3875	10.0709	10.0106	9.60506	7.52905		6.00718	27.9238	16.7888		10.3426	79.547	10.3206	16.9066		1.42488	11.2118	1.1181	6.32704		0.414815	3.19043	0.413934	0.67808		0.0571483	0.449678	0.0448442	0.253762
151.5	5.04346	13.3555	8.41246	8.37632	12.8576	13.9659		49.9046	108.671	42.5803	124.388	108.776	57.273	95.0829	60.2003		14.5481	10.0588	10.1753	10.2516	7.79809		6.66974	28.6586	17.4955		10.3352	80.8595	10.5664	17.6079		1.46291	11.2254	1.09607	6.34788		0.414519	3.24307	0.423791	0.70621		0.0586738	0.450221	0.0439607	0.254598
153.52	5.08763	13.7049	8.38435	8.90637	12.9219	14.0623		50.7639	109.776	41.7812	125.291	111.081	56.8996	96.2032	60.8307		14.9256	9.69341	10.3881	10.6652	7.79809		6.69383	29.7106	18.6761		10.5112	81.5783	10.6941	18.3602		1.47349	11.4666	1.17022	6.64626		0.421579	3.2719	0.428912	0.73638		0.0590979	0.459896	0.0469346	0.266565
155.54	5.01937	13.6286	8.65339	8.88629	12.4922	14.5762		50.7318	111.37	42.3836	126.428	113.317	59.4052	106.949	61.678		15.1304	9.328	10.9824	11.1229	8.32412		7.33229	30.2327	19.0455		10.5427	84.0328	10.9776	18.8701		1.48787	11.8602	1.16252	6.61135		0.42284	3.37034	0.440282	0.756834		0.0596749	0.475684	0.0466256	0.265164
157.56	5.25227	13.4037	8.93849	8.88629	12.5484	14.6445		51.2217	113.249	43.4436	126.291	114.582	60.2886	114.891	62.5012		15.6444	9.29186	11.1791	11.6369	8.40845		7.52504	30.5178	20.1216		10.6123	85.8086	11.2321	19.3881		1.44118	12.1384	1.25244	6.64755		0.425632	3.44157	0.450493	0.77761		0.0578021	0.486841	0.0502324	0.266617
159.58	5.09968	13.4158	9.13525	9.57696	12.8456	14.8654		51.8441	114.241	44.8772	126.729	115.305	60.7585	101.455	64.011		15.8813	9.09911	11.6891	11.9019	8.32011		7.50094	31.0759	20.8404		10.8231	84.9026	11.3783	19.8058		1.46414	11.5903	1.32655	6.82514		0.434087	3.40523	0.456355	0.794359		0.0587231	0.464858	0.0532047	0.273739
161.6	5.184	13.8133	8.94251	9.58499	12.4922	15.4797		53.6269	116.614	45.5237	129.468	116.867	61.3407	98.7531	65.2036		15.6203	9.37217	11.8939	12.6167	8.42049		7.89848	31.5337	21.7359		10.9161	85.9246	11.5847	20.3893		1.53002	11.7024	1.27189	6.85603		0.437818	3.44622	0.464633	0.817765		0.0613651	0.469352	0.0510122	0.274978
163.62	5.26431	14.006	9.44444	9.88213	12.8857	15.9054		53.2776	118.429	46.375	131.712	119.136	63.1878	99.5682	66.091		15.3874	9.32398	11.7694	12.6408	8.19964		8.0069	33.0355	22.5149		11.2313	87.2221	11.4642	21.1858		1.55886	11.9291	1.26702	7.25563		0.450461	3.49826	0.459802	0.849707		0.0625219	0.478447	0.0508169	0.291005
165.64	5.60162	13.8856	9.46051	9.84198	12.9379	16.8651		53.651	118.967	46.5316	125.842	121.055	62.963	100.705	66.6371		16.1543	9.22359	12.3958	13.219	8.42852		8.35223	33.4772	22.9686		11.4321	87.0439	11.8843	21.5993		1.61467	11.6653	1.40175	7.28519		0.458513	3.49111	0.476648	0.866295		0.0647602	0.467864	0.0562207	0.292191
167.66	5.88672	14.1667	9.41232	9.84198	13.476	16.6844		55.2974	120.971	48.2301	125.649	122.179	63.3605	101.729	67.5888		16.6041	9.34004	12.4159	13.0463	8.79795		8.81803	34.8344	23.7436		11.578	88.1256	12.0409	22.4654		1.59659	11.6004	1.41042	7.53743		0.464365	3.53449	0.482929	0.901029		0.0640354	0.465264	0.0565682	0.302307
169.68	6.26417	14.5843	9.5368	10.0187	13.4519	16.584		55.8836	122.766	49.7921	124.99	123.119	64.7418	103.768	68.7332		16.849	9.22761	12.5805	13.2873	8.97865		9.23965	36.4125	23.9966		11.74	89.2243	12.1846	23.2163		1.55227	11.5344	1.45175	7.85383		0.47086	3.57856	0.488694	0.931145		0.0622578	0.462616	0.0582259	0.314997
171.7	6.11961	13.8133	9.82592	10.5367	13.733	17.0899		56.4498	125.444	49.8965	123.822	124.701	63.758	104.009	68.9139		16.8771	9.16336	12.8576	13.484	8.95857		9.43641	37.4686	24.6832		11.8531	89.6243	12.2681	23.8627		1.56542	11.7006	1.47752	8.10258		0.475397	3.59461	0.492044	0.957074		0.0627851	0.469283	0.0592597	0.324974
173.72	5.7542	13.8454	9.87812	10.6892	14.2108	17.0779		57.7549	125.203	50.3985	123.754	125.155	65.4927	103.813	69.8897		17.0177	8.83409	12.6368	13.5322	9.21155		9.56491	38.2596	26.4099		11.9093	90.1825	12.2465	24.7448		1.62542	11.5093	1.50707	8.32519		0.477651	3.61699	0.491174	0.992452		0.0651914	0.46161	0.0604446	0.333902
175.74	5.69799	13.8374	10.0829	10.8378	13.9619	17.1743		58.8431	127.291	50.788	122.059	126.287	66.083	104.403	71.4397		16.5398	9.36012	13.5563	14.0703	8.9144		9.7697	40.0947	28.249		11.932	90.8993	12.4882	26.0378		1.61979	11.465	1.45973	8.82362		0.478564	3.64574	0.50087	1.04431		0.0649657	0.459833	0.0585463	0.353893
177.76	6.12363	13.8856	10.9703	11.4281	14.1466	17.6601		60.2485	127.869	52.093	122.268	127.572	66.7697	104.74	71.5882		16.4113	9.06297	14.1707	14.4638	8.74976		9.91024	40.6489	27.7029		12.3691	91.6436	12.5717	26.0873		1.58432	11.4044	1.54593	8.91017		0.496092	3.67559	0.50422	1.0463		0.0635431	0.457401	0.0620033	0.357364
179.78	6.20796	14.3193	11.3759	11.2434	14.761	17.5156		60.9432	128.958	52.5829	121.661	127.03	66.352	106.105	71.8974		16.6161	9.08707	14.9256	15.042	8.89432		10.1793	41.9097	27.8234		12.5705	91.9413	12.913	26.6375		1.59144	11.3797	1.62917	9.17896		0.504171	3.68753	0.517909	1.06836		0.0638286	0.456412	0.065342	0.368145
181.8	6.67777	14.7208	11.0065	11.4201	15.2428	17.9854		63.1959	130.351	53.125	122.316	128.749	68.5686	105.17	72.2307		16.4314	8.82606	15.5721	14.9939	9.08305		10.6732	43.0863	28.7349		12.8422	92.9632	12.9813	27.4981		1.62416	11.3288	1.66024	9.37726		0.515069	3.72852	0.520647	1.10288		0.0651411	0.45437	0.0665882	0.376098
183.82	6.79422	15.4356	10.8579	11.4241	15.4516	18.3107		63.5171	130.829	54.4059	120.405	129.56	68.1068	106.852	73.3912		17.0056	8.99069	16.0539	15.4155	9.09911		11.2032	44.5359	28.3695		13.0457	93.3833	13.313	28.0362		1.69033	11.2379	1.76079	9.62374		0.523229	3.74537	0.53395	1.12446		0.067795	0.450725	0.070621	0.385984
185.84	7.26805	15.0139	11.3076	11.8296	NaN	18.3107		65.565	131.002	54.944	121.24	129.383	69.0264	106.704	73.7606		16.7607	9.07502	16.7888	16.5519	9.31595		11.6008	45.4875	29.273		12.746	93.953	13.6985	28.7871		1.6959	11.0935	1.83918	9.78528		0.511209	3.76822	0.549411	1.15458		0.0680181	0.444933	0.073765	0.392463
187.86	6.95484	15.6243	11.2354	11.9341	NaN	18.8969		65.9746	132.126	56.6466	120.987	130.869	69.6729	108.009	75.4271		16.7687	8.83409	17.9452	16.5318	9.13927		11.9782	46.399	29.8913		12.9291	94.9639	13.8438	29.4229		1.85326	11.0579	1.9979	9.9392		0.518553	3.80876	0.555241	1.18008		0.0743295	0.443503	0.0801307	0.398636
189.88	7.75392	16.0218	11.6771	11.8818	NaN	18.6078		66.1272	132.644	57.7147	119.646	132.242	70.1467	108.326	76.6558		16.7808	8.74976	18.411	16.4796	8.9144		12.2794	48.0815	30.321		13.1885	95.4378	13.8671	30.2273		1.71905	10.9915	2.08181	10.3353		0.528957	3.82777	0.556175	1.21234		0.0689467	0.440841	0.083496	0.414523
191.9	8.32011	16.1222	12.0224	11.6931	NaN	19.7402		66.6934	132.817	58.5419	119.69	133.19	70.4478	109.96	78.0853		17.4634	8.70559	19.6639	17.2546	8.98266		12.3798	48.9248	30.317		13.5796	96.1781	14.414	30.5405		1.80351	10.9628	2.31316	10.5502		0.544643	3.85746	0.57811	1.2249		0.0723342	0.43969	0.092775	0.423143
193.92	8.33617	15.9335	12.171	12.1268	NaN	19.7402		67.3479	133.246	60.381	120.83	134.575	69.3998	107.676	79.4385		17.1582	9.20753	20.5473	17.0217	9.20351		12.3356	50.4426	31.1522		13.6615	96.6118	14.6276	31.3102		1.76834	10.9354	2.30191	11.0008		0.547929	3.87486	0.586678	1.25577		0.0709235	0.438593	0.092324	0.441216
195.94	8.77787	16.3551	12.5886	13.1427	NaN	19.684		69.1629	135.013	62.722	120.485	134.764	70.1668	108.848	79.6393		17.2345	9.36815	20.8083	17.5879	9.47657		12.6167	51.053	31.3811		14.1096	97.6001	14.8951	31.6836		1.68067	10.7997	2.31945	11.0966		0.565902	3.91449	0.597404	1.27075		0.0674073	0.433148	0.0930274	0.445058
197.96	9.19147	16.8169	12.1629	12.9098	NaN	19.8727		69.5403	136.27	64.5611	120.075	135.591	70.1467	109.358	81.0447		17.9854	8.79795	21.242	18.0818	9.16336		12.9821	52.5387	32.1521		14.1908	98.3234	15.0541	32.5576		1.70693	10.7608	2.54842	11.4208		0.569155	3.9435	0.603781	1.3058		0.0684607	0.43159	0.102211	0.45806
199.98	9.68537	17.7485	12.5765	12.9379	NaN	20.202		70.8936	136.334	67.6009	119.826	137.258	70.0342	109.651	81.6993		17.9774	8.71362	22.2177	18.4954	9.44444		13.0825	54.3136	32.9311		14.6301	99.1621	15.3697	33.4424		1.73567	10.6223	2.6728	11.9051		0.586774	3.97714	0.61644	1.34129		0.0696132	0.426034	0.107199	0.477485
202	9.56089	18.2906	12.6327	12.97	NaN	20.5553		71.3835	136.876	69.1549	122.075	135.407	70.0222	110.442	83.3456		17.5236	8.76984	22.4868	18.5436	9.37217		13.9659	55.6387	33.1519		14.8019	99.8383	15.3392	34.2522		1.83487	10.4847	2.69155	12.0425		0.593667	4.00426	0.615216	1.37377		0.0735919	0.420513	0.107951	0.482993
204.02	10.095	18.4914	12.7853	13.484	NaN	20.6959		72.3151	137.699	71.0341	122.918	137.205	71.4959	111.269	83.9961		18.3508	8.90637	23.7075	19.2423	9.36012		14.3112	56.759	33.429		15.1103	100.992	15.9134	34.8331		1.77757	10.4574	2.91388	12.2737		0.606036	4.05052	0.638246	1.39707		0.0712937	0.419418	0.116868	0.492268
206.04	10.7374	18.9371	12.689	13.6487	NaN	21.0854		72.825	137.326	72.4757	123.93	138.454	72.4395	111.494	84.2692		18.6319	9.42035	24.3379	19.5836	9.14328		15.3593	57.6424	34.0634		15.4195	101.652	16.2234	35.6884		1.79105	10.4009	2.99455	12.2331		0.618437	4.07699	0.65068	1.43137		0.0718345	0.417154	0.120104	0.490639
208.06	11.0788	19.8887	12.8857	13.8414	NaN	21.2219		73.9132	138.466	75.4431	125.813	139.081	72.2829	111.49	85.5582		18.4914	9.1473	24.7435	19.953	9.071		16.4113	60.3007	33.6458		15.7833	102.756	16.2812	36.786		1.83408	10.3552	3.10529	12.7667		0.633028	4.12128	0.652999	1.47539		0.0735604	0.415322	0.124545	0.512039
210.08	10.8981	19.8285	13.4158	13.5362	NaN	21.3303		74.4914	139.257	77.5231	127.665	138.551	73.2667	112.398	85.4778		18.5676	9.15533	25.8196	20.3505	9.48058		16.3672	61.156	33.0796		15.8018	103.579	16.6747	36.8676		1.84449	10.2864	3.23281	13.0674		0.633769	4.15428	0.668782	1.47867		0.0739779	0.41256	0.12966	0.524101
212.1	10.8338	20.9047	13.227	14.0101	NaN	21.8563		75.5676	139.836	80.069	129.331	139.157	74.2385	112.462	86.9114		19.3627	9.50468	26.8275	20.4027	9.58097		16.4153	61.3367	32.5576		16.1664	104.697	17.1357	36.7699		2.00575	10.1669	3.35314	13.1376		0.648393	4.19911	0.687271	1.47475		0.0804455	0.407767	0.134486	0.526916
214.12	10.7615	20.6396	13.8294	13.8936	NaN	22.4587		75.7162	139.816	81.0407	130.544	139.338	74.3469	112.008	87.1925		19.2342	9.58097	29.0923	20.5754	10.2315		17.0739	62.2482	32.8909		16.3166	105	17.7429	37.4043		2.03439	10.1604	3.62004	13.2345		0.654416	4.21129	0.711621	1.50019		0.0815942	0.407509	0.145191	0.530803
216.14	10.4122	21.0171	13.6527	14.3072	NaN	22.4065		76.8566	139.538	83.2171	132.234	140.245	74.2626	113.49	87.7908		19.0575	9.53279	29.7669	21.0291	10.1431		17.359	63.3565	32.2003		16.3591	105.954	17.9059	37.6386		2.09333	10.1323	3.75588	13.5539		0.656123	4.24956	0.71816	1.50959		0.083958	0.40638	0.150639	0.543612
218.16	10.7133	21.6556	13.8053	14.2952	NaN	22.6394		77.0373	140.779	85.4538	134.362	140.831	75.3829	111.844	88.8348		19.2021	9.59703	30.5218	21.0051	10.3439		17.7164	64.8021	32.0718		16.6217	106.816	18.134	38.1967		2.13898	10.1323	3.84971	13.9332		0.666656	4.28411	0.727308	1.53197		0.0857891	0.40638	0.154402	0.558825
220.18	10.8659	21.5753	13.8896	14.2831	NaN	22.7277		78.0773	139.771	87.4575	134.977	140.928	76.2181	111.185	89.2765		19.5073	9.84198	31.2205	21.7439	10.633		18.0135	66.1111	32.2725		16.6683	107.236	18.5893	38.7991		2.12007	9.91474	3.93801	14.2629		0.668524	4.30098	0.745571	1.55613		0.0850305	0.397655	0.157944	0.572049
222.2	10.8418	21.76	14.0864	14.1707	NaN	22.8241		77.8323	140.273	88.7746	135.186	141.61	76.178	111.976	89.919		19.7281	9.72151	31.4775	21.7158	10.4403		18.4271	66.4364	32.2444		16.7366	107.719	18.6166	39.036		2.14716	9.95053	4.01383	14.269		0.671262	4.32032	0.746666	1.56563		0.0861173	0.399091	0.160985	0.572295
224.22	10.9824	21.8282	14.5321	14.3915	NaN	23.069		78.3744	140.711	89.5375	137.346	142.566	76.8405	112.072	91.742		20.4589	10.1793	32.3368	22.0571	10.9101		18.4793	68.4963	32.1882		16.9606	108.649	19.1884	39.7213		2.1335	9.99375	4.07688	14.9219		0.680249	4.35763	0.7696	1.59312		0.0855692	0.400824	0.163513	0.598478
226.24	10.637	22.282	14.6244	14.8011	NaN	22.8602		79.5229	140.358	91.224	137.033	142.217	76.5875	111.012	91.5774		21.1817	10.1231	33.2443	22.4466	10.9021		19.1499	70.6848	32.2525		17.041	108.691	19.5796	40.6957		2.17178	9.83324	4.2558	15.4642		0.68347	4.35934	0.785286	1.6322		0.0871044	0.394386	0.170689	0.620231
228.26	11.0788	22.4426	14.5682	15.0099	NaN	23.2216		78.8764	138.278	92.9748	136.736	142.819	77.9006	111.731	92.525		21.0693	10.2355	34.2361	22.6313	10.7214		19.8486	71.516	32.9833		17.2642	108.98	19.7787	41.4493		2.16907	9.61813	4.42678	15.5041		0.692424	4.37091	0.793274	1.66243		0.0869958	0.385759	0.177547	0.621831
230.28	10.7495	22.4707	14.5722	14.3474	NaN	23.3019		80.3902	137.679	95.1833	137.294	142.703	78.6635	112.265	92.7419		21.0091	10.4443	35.5291	23.1815	10.8579		20.5192	73.5398	32.2404		17.0883	109.615	20.2044	42.0998		2.25096	9.4118	4.62046	16.08		0.68537	4.39638	0.810346	1.68852		0.0902802	0.377484	0.185315	0.644929
232.3	10.4001	22.9526	14.769	15.1424	NaN	23.1413		80.6673	137.474	94.9102	136.9	143.08	78.6635	112.518	93.0551		21.2339	10.376	36.4768	23.322	11.0587		21.7158	73.7767	32.5817		17.2811	109.659	20.4935	42.6914		2.2798	9.38786	4.77175	15.856		0.693101	4.39813	0.821942	1.71224		0.091437	0.376523	0.191383	0.635944
234.32	10.5608	23.1052	14.8413	15.8853	NaN	23.6031		82.1851	136.551	96.1631	136.322	143.658	80.073	113.41	93.3964		21.4588	10.4925	36.6334	23.7637	11.4401		21.8483	75.4913	32.4211		17.5991	110.22	20.7577	43.2536		2.29534	9.14014	4.76317	16.4053		0.705856	4.42064	0.832539	1.73479		0.0920601	0.366588	0.191039	0.657974
236.34	10.6611	22.9405	14.8694	15.8773	NaN	23.8801		82.0245	135.997	96.4883	136.109	145.297	79.31	112.908	93.6173		21.7238	10.8218	37.2156	24.5026	11.5365		22.9646	76.7682	32.0356		17.6457	110.219	21.1601	43.9228		2.29604	9.24557	4.8413	16.6302		0.707724	4.4206	0.848676	1.76163		0.0920883	0.370816	0.194172	0.666994
238.36	10.376	22.8241	15.2227	16.2226	NaN	23.9846		81.0809	134.519	98.0423	136.687	144.867	80.069	113.325	94.1513		22.4466	10.7294	38.0709	24.888	11.4964		24.3901	78.262	33.172		17.726	110.343	21.5263	45.2747		2.30677	9.12765	5.0152	16.6873		0.710945	4.42557	0.863364	1.81585		0.0925186	0.366087	0.201147	0.669287
240.38	10.2957	23.057	15.6926	16.592	NaN	24.3379		82.6831	133.575	99.006	136.904	145.156	80.0609	113.273	94.5328		22.3221	10.7174	38.1793	25.0205	11.5847		24.4624	80.0248	32.8869		17.995	110.649	21.5648	45.7914		2.3488	8.98968	5.02905	17.2886		0.721735	4.43785	0.86491	1.83658		0.0942044	0.360553	0.201703	0.693403
242.4	10.4282	23.1533	15.7448	17.4714	NaN	24.0608		84.3093	132.387	98.5925	136.471	145.927	81.2335	112.562	95.8539		22.8321	10.613	39.6972	25.5867	11.3398		24.7475	80.86	33.2483		18.1717	110.917	22.0137	46.2853		2.28984	8.77316	5.33878	17.4607		0.728822	4.4486	0.882916	1.85639		0.0918396	0.351869	0.214125	0.700304
244.42	10.3801	22.5671	15.8612	17.8208	NaN	23.836		85.261	133.282	98.5844	135.551	144.975	82.3538	114.952	96.2032		23.9042	11.0948	39.3157	25.8558	11.7895		25.5265	81.7394	32.7263		18.093	111.395	22.392	46.6641		2.21306	8.58169	5.19969	17.6604		0.725665	4.46779	0.898087	1.87158		0.0887604	0.34419	0.208547	0.708314
246.44	10.5246	23.2015	15.4155	18.5837	NaN	24.2094		85.0602	132.347	99.4076	136.659	147.887	82.7393	115.104	96.4602		25.0848	10.9743	40.1228	25.8558	11.8698		25.4783	83.2412	32.8829		18.387	111.958	22.7815	47.2008		2.30729	8.76432	5.35701	18.1465		0.737454	4.49035	0.913709	1.8931		0.0925395	0.351515	0.214856	0.727812
248.46	10.5005	23.6954	15.7407	19.2262	NaN	24.7796		86.5821	131.913	99.006	137.31	156.255	81.4704	114.703	96.2273		24.9202	11.5245	39.5928	26.1087	11.7774		26.5866	84.8836	33.6498		18.7885	112.933	22.7847	48.3733		2.39915	9.44127	5.22529	18.3686		0.753559	4.52947	0.913838	1.94013		0.096224	0.378665	0.209573	0.736719
250.48	10.9864	24.3821	16.066	19.1619	NaN	25.1972		85.9918	133.033	98.8053	137.527	145.586	82.8437	116.554	97.5725		25.1611	11.1671	39.7132	26.9279	11.657		27.3295	85.5421	33.4451		19.1587	112.239	22.9253	48.7722		2.41608	8.60966	5.32956	18.4695		0.768408	4.50163	0.919474	1.95613		0.096903	0.345312	0.213755	0.740765
252.5	11.0225	24.7314	16.2748	19.3948	NaN	25.3779		86.8672	132.387	98.5684	137.43	145.044	82.7473	115.538	98.5121		26.2212	11.3598	40.0505	26.8275	11.9822		28.2169	87.072	33.7302		19.3603	112.137	23.2883	49.673		2.45035	8.46873	5.34891	18.7671		0.776493	4.49752	0.934033	1.99226		0.0982772	0.339659	0.214531	0.752701
254.52	10.8579	25.3579	16.6161	19.431	NaN	25.8236		88.0678	133.957	97.3637	138.406	145.783	83.6307	116.67	98.9779		26.2372	11.2193	41.1628	26.8155	12.2633		29.5701	88.4895	34.4971		19.6173	112.857	23.5396	50.8522		2.55964	8.55439	5.5115	18.8723		0.7868	4.52641	0.944115	2.03955		0.102661	0.343095	0.221052	0.75692
256.54	10.8258	25.8598	16.6362	19.5956	NaN	25.8518		88.3168	133.587	98.2551	139.326	145.859	83.9921	117.365	99.8011		26.438	11.5526	41.1468	27.8796	11.9702		31.0036	90.2603	34.5694		19.7538	113.313	23.7974	51.9444		2.61345	8.51175	5.54282	19.1856		0.792276	4.54469	0.954455	2.08336		0.104819	0.341385	0.222308	0.769484
258.56	11.1149	26.8516	16.1664	19.3266	NaN	26.422		88.9593	133.636	97.7572	138.824	145.341	83.96	117.971	100.5		26.9319	12.4119	41.2833	28.4658	11.8176		32.0155	91.3043	34.8143		19.9763	113.368	24.1821	52.7114		2.75589	8.42204	5.52169	19.3134		0.801198	4.54692	0.969883	2.11412		0.110532	0.337787	0.221461	0.77461
260.58	11.4	26.2654	17.0016	19.4109	NaN	26.7512		89.7664	134.567	98.5081	138.595	147.345	85.1124	118.196	101.014		27.6708	12.5002	40.9781	28.5301	11.9341		31.879	92.4247	35.4207		20.1658	114.138	24.3227	53.2414		2.6457	8.43847	5.47524	19.6183		0.8088	4.57778	0.97552	2.13538		0.106112	0.338446	0.219598	0.786839
262.6	11.5767	26.7994	17.0739	19.7241	NaN	27.0644		90.5976	136.125	97.2794	139.675	148.983	84.4659	117.803	102.178		28.3574	12.697	39.8417	28.8192	11.7654		33.5776	93.8461	36.6334		20.4477	114.638	24.2962	54.6857		2.6982	8.68393	5.33937	19.6001		0.820106	4.59785	0.974457	2.1933		0.108218	0.348291	0.214149	0.78611
264.62	12.2553	27.1488	16.7647	20.1176	NaN	27.1126		91.0875	136.093	96.3799	138.988	150.099	85.3413	118.525	101.973		28.9999	12.4681	40.0666	28.3414	11.8497		34.4971	95.4041	36.8301		20.6798	114.811	24.3451	55.5771		2.66024	8.69349	5.39444	19.9249		0.829414	4.60478	0.976422	2.22906		0.106696	0.348674	0.216357	0.799137
266.64	12.2914	27.5021	16.6201	20.1538	NaN	28.3333		91.6778	137.997	96.7252	139.318	150.432	86.1565	119.658	102.367		29.546	12.7452	39.9863	29.3974	11.9541		35.1918	96.1229	37.4485		20.9802	115.541	24.7258	56.2544		2.82689	8.72643	5.40644	19.9449		0.841461	4.63407	0.99169	2.25622		0.11338	0.349995	0.216839	0.799939
268.66	12.3557	28.1928	17.0016	20.2381	NaN	28.514		91.4127	140.064	97.0023	140.028	151.244	85.3614	118.549	103.375		29.3171	13.1106	40.4641	29.2569	12.0666		35.2239	98.0825	37.4084		21.2604	115.88	24.8431	56.9049		2.88061	8.9328	5.40559	20.5984		0.852702	4.64764	0.996392	2.28231		0.115534	0.358272	0.216804	0.826151
270.68	12.187	27.9679	17.4232	20.5232	NaN	28.5502		92.1998	142.932	97.8777	139.787	153.215	85.8593	118.75	103.483		29.6022	13.3917	39.7695	30.2046	11.5967		38.36	98.8374	37.7778		21.3303	116.763	24.9129	58.3251		2.85555	9.10163	5.38873	20.2569		0.855505	4.68307	0.999195	2.33927		0.114529	0.365043	0.216128	0.812451
272.7	12.6327	28.8393	17.375	20.4067	NaN	28.6947		92.6134	142.843	98.9659	140.474	154.432	86.5299	118.228	104.134		29.8151	13.8615	40.0546	30.1122	11.8015		38.9423	100.428	39.5727		21.5897	117.278	25.129	59.6475		2.90422	9.09753	5.3579	20.3908		0.865909	4.70371	1.00786	2.39231		0.116481	0.364879	0.214892	0.817824
274.72	12.6488	28.5863	17.8368	20.6196	NaN	28.9678		92.5371	145.445	98.6085	142.333	156.536	86.289	117.807	104.539		29.55	13.5844	39.8096	30.4656	11.9581		39.1752	101.435	40.416		21.7319	118.012	25.0736	60.3422		2.87411	9.48832	5.33984	20.5497		0.87161	4.73316	1.00564	2.42017		0.115273	0.380552	0.214168	0.824198
276.74	12.1228	28.8353	18.1259	21.25	NaN	28.775		92.8583	146.762	98.8414	141.888	157.5	87.2607	117.654	105.001		29.8753	14.4237	40.7814	30.4053	11.8096		39.7976	102.58	39.8176		21.8218	118.471	25.459	60.7317		2.92684	9.51455	5.41678	20.9241		0.875217	4.75156	1.0211	2.43579		0.117388	0.381604	0.217253	0.839212
278.76	12.5083	29.4697	18.3428	21.5471	NaN	28.8473		94.0991	147.61	99.9256	142.98	158.672	88.3048	117.048	105.507		29.7749	14.8774	40.8697	31.361	11.5727		40.1469	103.471	40.6087		22.143	119.268	25.6911	61.409		2.93153	9.52329	5.45656	21.0316		0.888102	4.78355	1.03041	2.46296		0.117576	0.381955	0.218849	0.843523
280.78	11.9702	29.1123	18.142	21.5672	NaN	28.9638		95.5929	149.192	100.126	145.212	161.543	89.1159	117.208	105.234		30.309	15.4998	40.7854	31.9593	11.6289		41.9619	105.073	41.713		21.9511	120.403	26.0365	62.9161		2.99121	9.80406	5.42893	21.0788		0.880403	4.82906	1.04426	2.52341		0.11997	0.393216	0.21774	0.845417
282.8	12.2673	29.55	18.4552	21.8523	NaN	28.6385		96.4602	151.179	102.086	145.208	161.804	89.4974	116.831	105.387		30.5378	16.1383	40.7854	31.6903	11.8176		42.6526	105.989	42.5402		22.1527	121.057	26.1939	63.7272		2.94582	9.79735	5.33753	21.1309		0.888488	4.85528	1.05057	2.55594		0.118149	0.392947	0.214075	0.847507
284.82	12.4882	29.5059	18.6801	21.6315	NaN	29.1886		96.8859	151.729	102.532	146.301	162.652	89.7784	117.188	107.013		30.2367	16.853	41.5925	32.2685	11.657		43.5199	107.651	43.5521		22.2988	121.76	26.5215	64.9078		2.9524	9.83996	5.42402	21.3718		0.89435	4.88348	1.06371	2.60329		0.118413	0.394656	0.217544	0.857169
286.84	12.97	30.1684	19.0495	21.76	NaN	29.2208		98.3194	153.344	102.491	147.951	163.559	90.3125	116.433	107.362		30.068	16.845	41.3395	32.1199	11.8618		45.5036	109.956	44.2186		22.6337	122.472	26.4469	66.5595		2.93795	9.97494	5.34794	21.7016		0.907782	4.91203	1.06072	2.66953		0.117834	0.400069	0.214492	0.870395
288.86	13.1869	30.6824	19.1539	22.6956	NaN	29.1244		100.351	155.36	102.668	149.601	164.7	90.0756	117.662	107.503		30.6463	17.351	40.938	33.0034	12.2312		47.2704	110.137	45.359		22.9686	123.49	26.8339	67.5888		2.94183	10.1513	5.26634	21.2812		0.921214	4.95287	1.07624	2.71082		0.117989	0.407142	0.211219	0.853537
290.88	13.1989	30.5981	18.7002	22.6313	NaN	29.0521		101.223	156.769	102.7	150.376	165.105	91.5613	115.831	107.599		30.4455	17.877	41.6086	33.2162	11.9702		47.2262	110.892	46.2183		22.8361	123.896	27.0235	68.1122		2.95035	10.1941	5.35278	21.3919		0.915899	4.96914	1.08384	2.73181		0.118331	0.40886	0.214686	0.857973
292.9	12.9741	32.0677	18.8889	22.2699	NaN	29.8994		100.239	157.363	103.656	151.473	166.362	91.5734	116.465	108.671		30.1965	18.7002	41.8134	33.0556	11.396		48.1699	112.028	47.0496		23.22	124.475	27.0323	69.0826		3.21155	10.3357	5.37908	21.4753		0.931295	4.99239	1.0842	2.77073		0.128807	0.414538	0.215741	0.86132
294.92	12.448	32.0838	19.2704	22.7518	NaN	30.1925		100.757	158.785	104.708	154.311	167.265	92.9386	115.494	110.434		30.2327	19.4511	43.4115	33.2603	11.3116		48.9529	113.454	47.6238		23.3493	125.587	27.5334	70.0102		3.28477	10.449	5.57076	21.7252		0.936481	5.03696	1.1043	2.80793		0.131744	0.419082	0.223429	0.871343
296.94	12.6649	32.8869	19.5836	22.7799	NaN	30.8109		101.419	159.773	105.539	156.247	167.916	91.7139	115.445	110.454		30.0078	19.7522	42.488	32.6379	11.4683		49.3063	114.526	48.7602		23.7452	126.063	27.2708	70.8641		3.38206	10.6602	5.35775	21.8315		0.952361	5.05609	1.09376	2.84218		0.135646	0.427554	0.214886	0.875605
298.96	12.705	34.1638	19.945	22.8642	NaN	30.839		101.628	160.535	106.411	158.765	168.121	92.1074	116.269	109.896		30.1122	20.471	43.9657	32.6098	11.0185		51.061	115.759	50.0772		24.1034	126.716	27.6354	72.299		3.50792	10.7875	5.5902	21.7317		0.966727	5.08228	1.10839	2.89973		0.140694	0.43266	0.224209	0.871604
300.98	13.2431	34.4971	19.9811	23.2055	NaN	30.7988		102.439	161.045	105.118	161.435	168.912	92.8864	116.293	109.286		29.6424	20.8364	44.3511	32.903	10.89		51.7517	117.931	51.9444		24.3451	127.177	27.7246	73.8757		3.46598	10.9996	5.64706	22.0277		0.976422	5.10074	1.11196	2.96297		0.139012	0.441164	0.226489	0.883477
303	12.9781	35.4849	20.6557	23.575	NaN	30.8832		103.556	161.628	106.772	163.688	168.57	94.1513	116.148	109.996		30.1724	20.8605	45.2386	32.405	10.7816		52.9162	118.132	52.8198		24.7154	128.064	27.8916	74.6226		3.59149	10.9454	5.78221	21.7546		0.991271	5.13631	1.11866	2.99292		0.144045	0.43899	0.23191	0.872523
305.02	13.464	35.7821	20.8966	23.5268	NaN	30.9956		103.652	161.861	107.117	164.953	168.88	93.9385	118.61	110.723		30.068	21.6556	46.0095	32.2284	10.886		54.0325	118.814	53.7193		24.933	128.717	28.1695	75.5221		3.56058	10.9828	5.82879	21.6464		1	5.1625	1.12981	3.029		0.142806	0.440492	0.233778	0.868182
[truncated: 2 more columns]

## Sheet: Figure 5C - N_microtubules
Each frame is ~2.02 seconds.
	Buffer								Wildtype										F75A							L77A					Mean MT number per frame					Error in MT number per frame (st.dev)					SEM per frame
	Manual MT counts per frame								Manual MT counts per frame										Manual MT counts per frame							Manual MT counts per frame				Frame	Buffer	Wildtype	F75A	L77A		Buffer	Wildtype	F75A	L77A		Buffer	Wildtype	F75A	L77A
Frame	Dataset 1	Dataset 2	Dataset 3	Dataset 4	Dataset 5	Dataset 6		Frame	Dataset 1	Dataset 2	Dataset 3	Dataset 4	Dataset 5	Dataset 6	Dataset 7	Dataset 8		Frame	Dataset 1	Dataset 2	Dataset 3	Dataset 4	Dataset 5		Frame	Dataset 1	Dataset 2	Dataset 3		1	2	14.125	3.8	1		0.894427	7.3957	3.70135	0		0.365148	2.61478	1.65529	0
1	3	3	1	1	2	2		1	26	18	11	4	18	6	11	19		1	1	0	6	3	9		1	1	1	1		2	6.33333	72.75	16.2	5.33333		1.0328	31.7389	11.3004	2.51661		0.421637	11.2214	5.05371	1.45297
2	7	5	6	8	6	6		2	81	104	58	26	118	37	69	89		2	9	5	12	22	33		2	8	3	5		3	8.66667	112	20.8	11		1.96638	38.4113	14.5499	4.3589		0.802773	13.5804	6.50692	2.51661
3	8	8	7	12	7	10		3	90	145	84	81	175	69	106	146		3	12	7	16	25	44		3	16	9	8		4	11.3333	141.375	23.4	14.3333		3.07679	43.0944	15.7099	3.05505		1.2561	15.2362	7.02567	1.76383
4	9	11	8	16	10	14		4	94	165	101	167	210	92	134	168		4	15	9	17	27	49		4	17	15	11		5	13.1667	160.875	24.8	20.3333		3.97073	51.1509	15.4661	5.85947		1.62104	18.0846	6.91665	3.38296
5	9	12	9	19	14	16		5	95	179	111	217	236	122	143	184		5	19	9	19	27	50		5	18	27	16		6	14.6667	175.25	27.4	24.3333		5.27889	53.843	15.3721	9.2376		2.1551	19.0364	6.87459	5.33333
6	9	13	10	22	14	20		6	99	187	121	243	248	143	166	195		6	19	13	24	28	53		6	19	35	19		7	15.5	186.875	30.6	28.3333		5.54076	55.8939	14.2583	9.29157		2.26201	19.7615	6.37652	5.36449
7	9	13	11	22	16	22		7	103	196	130	260	257	156	189	204		7	22	19	29	28	55		7	22	39	24		8	17.6667	198.625	33.8	31.6667		6.121	61.9538	14.6697	11.7189		2.49889	21.904	6.56049	6.76593
8	11	14	14	23	17	27		8	108	208	134	280	278	165	199	217		8	24	19	40	30	56		8	23	45	27		9	19	206	38.6	34		6.66333	64.2251	14.893	13.0767		2.72029	22.707	6.66033	7.54983
9	11	18	15	23	17	30		9	112	215	145	290	292	168	202	224		9	30	22	50	33	58		9	25	49	28		10	19.6667	214	41.4	36.3333		6.59293	64.1093	18.0914	12.8582		2.69155	22.6661	8.09074	7.42369
10	11	18	16	24	19	30		10	116	224	160	299	298	177	204	234		10	31	22	57	33	64		10	27	51	31		11	20.8333	218.875	42.8	38.6667		6.99762	66.3786	18.4716	13.6137		2.85677	23.4684	8.26075	7.85988
11	11	21	17	26	19	31		11	120	230	164	304	310	178	204	241		11	33	23	61	33	64		11	28	54	34		12	23.1667	224.75	44	40.3333		7.75672	67.7258	18.7617	13.6504		3.16667	23.9447	8.39047	7.88106
12	11	25	19	29	22	33		12	124	241	169	309	318	180	209	248		12	34	24	62	34	66		12	31	56	34		13	23.3333	231.5	45.4	43.6667		7.65942	68.856	18.636	13.2791		3.12694	24.3443	8.33427	7.66667
13	11	25	20	29	22	33		13	136	248	172	317	328	181	212	258		13	35	27	64	34	67		13	36	59	36		14	24.1667	236.75	46.2	46.6667		8.4004	69.9954	19.1885	15.885		3.42945	24.7471	8.58138	9.17121
14	11	25	21	31	22	35		14	146	256	173	322	339	183	215	260		14	35	28	66	34	68		14	38	65	37		15	26.1667	241.875	48	50.6667		9.49561	73.1133	20.2608	14.5717		3.87657	25.8495	9.06091	8.41295
15	11	27	22	34	25	38		15	150	261	176	328	355	186	218	261		15	35	29	70	36	70		15	46	67	39		16	26.8333	246.25	49.2	54.3333		9.41099	76.3165	21.0523	16.6233		3.84202	26.982	9.41488	9.59745
16	11	27	23	34	28	38		16	151	265	178	335	367	189	221	264		16	36	29	71	37	73		16	52	72	39		17	29	249.75	50.2	56		8.60233	78.0453	20.9571	19.3132		3.51188	27.5932	9.3723	11.1505
17	15	29	25	35	30	40		17	152	268	179	337	374	192	222	274		17	37	31	73	37	73		17	52	77	39		18	30	253.5	51.4	58.6667		8.39047	80.0089	22.1653	19.4251		3.4254	28.2874	9.91262	11.2151
18	17	31	25	36	30	41		18	155	270	181	350	377	195	222	278		18	37	32	78	37	73		18	54	80	42		19	30.6667	257.25	52.6	60.3333		8.4538	82.1719	21.5476	19.2959		3.45125	29.0521	9.63639	11.1405
19	17	31	27	36	31	42		19	158	274	184	361	382	196	223	280		19	39	34	79	38	73		19	54	82	45		20	31.5	260.125	54.2	61		8.80341	83.6872	22.0159	19.4679		3.59398	29.5879	9.84581	11.2398
20	17	31	28	37	33	43		20	160	275	185	366	387	196	227	285		20	41	35	82	39	74		20	54	83	46		21	32.5	261.375	55.8	62		8.8261	83.5942	22.0839	19.4679		3.60324	29.555	9.87623	11.2398
21	17	34	30	38	33	43		21	162	278	186	368	387	197	227	286		21	43	37	85	40	74		21	55	84	47		22	34.1667	264	56.2	63		9.38971	84.9084	22.2755	19.4679		3.83333	30.0196	9.96193	11.2398
22	18	35	30	42	36	44		22	163	280	188	373	392	200	228	288		22	44	37	86	40	74		22	56	85	48		23	35	265.5	57	66.3333		9.59166	85.1604	23.1193	18.0093		3.91578	30.1087	10.3392	10.3976
23	18	36	31	43	38	44		23	163	285	188	374	393	202	230	289		23	44	37	89	41	74		23	58	87	54		24	35.5	267.375	57.4	68.3333		9.60729	84.8106	23.1689	19.6554		3.92216	29.9851	10.3615	11.348
24	18	37	32	43	39	44		24	165	287	194	375	395	202	230	291		24	45	37	89	41	75		24	58	91	56		25	36.8333	268.625	58.2	69.3333		10.6097	84.6808	24.077	19.7315		4.33141	29.9392	10.7675	11.392
25	18	39	32	45	40	47		25	166	288	199	376	397	202	230	291		25	46	37	92	41	75		25	60	92	56		26	38	270.125	59.2	70.6667		10.7703	84.6006	24.2631	20.232		4.39697	29.9108	10.8508	11.6809
26	19	39	34	45	41	50		26	167	289	202	377	399	203	232	292		26	47	38	94	42	75		26	60	94	58		27	38.6667	271.125	60	72		11.1833	84.5871	24.4847	19.0788		4.56557	29.9061	10.9499	11.0151
27	19	41	34	46	41	51		27	168	291	204	377	401	204	232	292		27	48	38	95	43	76		27	62	94	60		28	39.5	272.75	61.2	73.3333		10.8582	84.9231	24.3146	20.5508		4.43283	30.0248	10.8738	11.865
28	20	41	36	47	42	51		28	171	293	206	380	403	204	232	293		28	49	39	96	45	77		28	63	97	60		29	40.6667	274	62	75		10.8382	84.4985	25.03	21		4.42468	29.8747	11.1937	12.1244
29	21	41	38	48	44	52		29	173	294	206	381	403	206	234	295		29	49	39	98	46	78		29	66	99	60		30	41.6667	275	63	76.3333		11.1116	84.5627	25.6223	19.8578		4.53627	29.8974	11.4586	11.4649
30	21	42	40	50	45	52		30	173	296	208	381	404	206	235	297		30	50	39	100	47	79		30	68	99	62		31	42.3333	276.25	63.2	78		11.639	84.4034	25.4696	19.1572		4.75161	29.8411	11.3903	11.0604
31	21	42	40	50	47	54		31	176	296	210	381	407	207	235	298		31	50	39	100	48	79		31	69	100	65		32	43.6667	277.5	63.8	79		11.0393	84.0425	24.954	19.975		4.50679	29.7135	11.1597	11.5326
32	23	42	44	51	48	54		32	178	299	212	382	407	208	235	299		32	51	40	100	49	79		32	69	102	66		33	45.3333	278.25	64.2	80.6667		10.1522	83.7918	24.4888	20.306		4.14461	29.6249	10.9517	11.7237
33	26	44	48	51	48	55		33	181	300	212	383	407	208	235	300		33	51	42	100	49	79		33	71	104	67		34	45.5	279.5	64.8	81.3333		10.2127	83.4865	25.0739	19.7315		4.16933	29.5169	11.2134	11.392
34	26	44	48	51	49	55		34	183	304	213	383	408	210	235	300		34	51	42	102	50	79		34	72	104	68		35	46.3333	280.75	65.2	82.6667		10.6333	83.8787	25.223	20.306		4.34102	29.6556	11.2801	11.7237
35	26	45	48	51	52	56		35	184	308	213	384	410	212	235	300		35	51	43	103	50	79		35	73	106	69		36	47.1667	281	66.4	83.3333		11.0167	83.9353	25.9384	20.6478		4.49753	29.6756	11.6	11.921
36	26	46	49	51	55	56		36	185	308	213	384	411	212	235	300		36	53	43	106	51	79		36	74	107	69		37	48.1667	281.5	66.6	84.3333		11.9903	83.9285	25.7934	20.5508		4.89501	29.6732	11.5352	11.865
37	26	46	49	51	58	59		37	185	309	215	385	411	212	235	300		37	53	43	106	52	79		37	74	108	71		38	49.5	282.25	66.8	86.3333		12.1943	84.0234	25.5676	21.4554		4.97829	29.7068	11.4342	12.3873				Mean # of MTs at 150 sec (frame 75)
38	27	47	51	52	59	61		38	186	310	216	385	413	213	235	300		38	53	44	106	52	79		38	76	111	72		39	50.1667	282.75	67.4	87.3333		12.0899	83.5391	26.1973	20.502		4.9357	29.5355	11.7158	11.8369					Buffer
39	28	47	52	53	59	62		39	188	310	216	385	413	213	237	300		39	53	44	108	53	79		39	76	111	75		40	50.8333	283.375	67.8	89		12.0069	83.3563	25.9268	19.9249		4.90181	29.4709	11.5948	11.5036				Mean	59.1667
40	29	47	53	54	59	63		40	190	310	217	385	414	213	237	301		40	54	44	108	54	79		40	78	112	77		41	51.6667	283.625	68.8	90		12.0111	83.2276	26.5556	19.0788		4.90351	29.4254	11.876	11.0151				Error (std)	15.7406
41	30	47	56	54	59	64		41	191	310	217	385	414	213	237	302		41	56	44	110	54	80		41	78	112	80		42	52.5	283.875	69.4	91		12.661	83.0343	27.2176	19.9249		5.16882	29.3571	12.1721	11.5036				SEM	6.42608
42	30	47	57	55	60	66		42	191	310	218	385	414	213	238	302		42	57	44	112	54	80		42	79	114	80		43	53.3333	284.375	69.6	92		13.2313	83.3854	27.1072	19.975		5.40165	29.4812	12.1227	11.5326
43	30	47	58	56	62	67		43	191	310	218	386	415	213	239	303		43	58	44	112	54	80		43	79	115	82		44	54	284.625	70.2	92.3333		13.8564	83.104	28.2878	20.5508		5.65685	29.3817	12.6507	11.865
44	30	47	59	56	63	69		44	192	310	218	386	415	214	239	303		44	58	44	115	54	80		44	79	116	82		45	54.5	285	70.8	94		13.9678	82.8199	27.941	19.0526		5.70234	29.2813	12.4956	11				Student's T-test, two-sample unpaired, unequal variance
45	31	47	59	56	63	71		45	194	310	218	386	415	214	239	304		45	60	44	115	55	80		45	83	116	83		46	55.1667	285.25	71	95		14.2185	82.7315	27.8478	18.2483		5.80469	29.25	12.4539	10.5357					Buffer
46	31	47	60	58	64	71		46	194	310	218	386	415	215	239	305		46	61	44	115	55	80		46	83	116	86		47	55.5	285.5	71.2	96		14.2373	82.8199	27.7074	18.3576		5.81234	29.2813	12.3911	10.5987				p-value	1
47	31	48	60	58	65	71		47	194	312	218	386	415	215	239	305		47	61	44	115	56	80		47	83	117	88		48	55.8333	285.625	71.4	97		14.3585	82.7405	28.1034	18.3576		5.86184	29.2532	12.5682	10.5987				Less than p = 0.05?
48	31	49	60	58	65	72		48	194	312	218	386	415	215	240	305		48	61	44	116	56	80		48	84	118	89		49	56.1667	286	71.4	97.3333		14.4557	82.8027	28.1034	18.1475		5.90151	29.2752	12.5682	10.4775				Significant?	FALSE
49	31	49	61	59	65	72		49	195	313	218	387	415	215	240	305		49	61	44	116	56	80		49	84	118	90		50	56.1667	286.375	71.8	97.6667		14.4557	83.2465	28.2613	18.7172		5.90151	29.4321	12.6388	10.8064
50	31	49	61	59	65	72		50	195	314	218	388	416	215	240	305		50	61	45	117	56	80		50	84	119	90		51	56.1667	286.375	72.6	98		14.4557	83.2465	29.3309	18.3576		5.90151	29.4321	13.1172	10.5987
51	31	49	61	59	65	72		51	195	314	218	388	416	215	240	305		51	61	45	120	57	80		51	85	119	90		52	56.3333	286.875	72.8	98		14.6788	83.3828	29.0981	18.3576		5.99259	29.4803	13.0131	10.5987
52	31	49	61	59	65	73		52	197	314	218	388	418	215	240	305		52	61	46	120	57	80		52	85	119	90		53	56.8333	287	73	98		14.9321	83.2655	29	18.3576		6.09599	29.4388	12.9692	10.5987
53	31	50	61	59	66	74		53	197	314	219	388	418	215	240	305		53	62	46	120	57	80		53	85	119	90		54	57.3333	287	73	98.3333		14.5556	83.2655	29	18.0093		5.94232	29.4388	12.9692	10.3976
54	32	51	62	59	66	74		54	197	314	219	388	418	215	240	305		54	62	46	120	57	80		54	86	119	90		55	57.6667	287.125	73.4	99		14.8549	83.1856	29.3138	17.3494		6.06447	29.4105	13.1095	10.0167
55	32	51	63	59	66	75		55	197	314	219	388	418	215	241	305		55	63	46	121	57	80		55	88	119	90		56	58	287.25	73.4	99.3333		14.9933	83.2325	29.3138	17.0392		6.121	29.4271	13.1095	9.83757
56	32	51	63	60	67	75		56	197	315	219	388	418	215	241	305		56	63	46	121	57	80		56	89	119	90		57	58.5	287.25	73.6	100.333		15.3721	83.2325	29.7204	17.0392		6.27561	29.4271	13.2914	9.83757
57	32	51	63	61	68	76		57	197	315	219	388	418	215	241	305		57	63	46	122	57	80		57	90	120	91		58	58.6667	287.375	73.6	100.333		15.6034	83.116	29.7204	17.0392		6.37007	29.3859	13.2914	9.83757
58	32	51	63	61	68	77		58	197	315	220	388	418	215	241	305		58	63	46	122	57	80		58	90	120	91		59	58.6667	287.375	73.6	100.333		15.6034	83.116	29.7204	17.0392		6.37007	29.3859	13.2914	9.83757
59	32	51	63	61	68	77		59	197	315	220	388	418	215	241	305		59	63	46	122	57	80		59	90	120	91		60	58.8333	287.375	73.6	100.667		15.6386	83.116	29.7204	17.6163		6.38444	29.3859	13.2914	10.1708
60	32	51	63	62	68	77		60	197	315	220	388	418	215	241	305		60	63	46	122	57	80		60	90	121	91		61	58.8333	287.375	73.6	100.667		15.6386	83.116	29.7204	17.6163		6.38444	29.3859	13.2914	10.1708
61	32	51	63	62	68	77		61	197	315	220	388	418	215	241	305		61	63	46	122	57	80		61	90	121	91		62	59	287.625	73.6	100.667		15.6971	83.3717	29.7204	17.6163		6.40833	29.4763	13.2914	10.1708
62	32	51	64	62	68	77		62	197	315	220	388	419	215	241	306		62	63	46	122	57	80		62	90	121	91		63	59	287.75	73.6	100.667		15.6971	83.2479	29.7204	17.6163		6.40833	29.4326	13.2914	10.1708
63	32	51	64	62	68	77		63	197	315	220	388	419	216	241	306		63	63	46	122	57	80		63	90	121	91		64	59	287.75	73.6	100.667		15.6971	83.2479	29.7204	17.6163		6.40833	29.4326	13.2914	10.1708
64	32	51	64	62	68	77		64	197	315	220	388	419	216	241	306		64	63	46	122	57	80		64	90	121	91		65	59.1667	287.875	73.6	100.667		15.7406	83.4205	29.7204	17.6163		6.42608	29.4936	13.2914	10.1708
65	32	51	64	63	68	77		65	197	315	220	389	419	216	241	306		65	63	46	122	57	80		65	90	121	91		66	59.1667	287.875	73.6	100.667		15.7406	83.4205	29.7204	17.6163		6.42608	29.4936	13.2914	10.1708
66	32	51	64	63	68	77		66	197	315	220	389	419	216	241	306		66	63	46	122	57	80		66	90	121	91		67	59.1667	287.875	73.6	100.667		15.7406	83.4205	29.7204	17.6163		6.42608	29.4936	13.2914	10.1708
67	32	51	64	63	68	77		67	197	315	220	389	419	216	241	306		67	63	46	122	57	80		67	90	121	91		68	59.1667	287.875	73.6	100.667		15.7406	83.4205	29.7204	17.6163		6.42608	29.4936	13.2914	10.1708
68	32	51	64	63	68	77		68	197	315	220	389	419	216	241	306		68	63	46	122	57	80		68	90	121	91		69	59.1667	287.875	73.6	100.667		15.7406	83.4205	29.7204	17.6163		6.42608	29.4936	13.2914	10.1708
69	32	51	64	63	68	77		69	197	315	220	389	419	216	241	306		69	63	46	122	57	80		69	90	121	91		70	59.1667	287.875	73.6	100.667		15.7406	83.4205	29.7204	17.6163		6.42608	29.4936	13.2914	10.1708
70	32	51	64	63	68	77		70	197	315	220	389	419	216	241	306		70	63	46	122	57	80		70	90	121	91		71	59.1667	287.875	73.6	100.667		15.7406	83.4205	29.7204	17.6163		6.42608	29.4936	13.2914	10.1708
71	32	51	64	63	68	77		71	197	315	220	389	419	216	241	306		71	63	46	122	57	80		71	90	121	91		72	59.1667	287.875	73.6	100.667		15.7406	83.4205	29.7204	17.6163		6.42608	29.4936	13.2914	10.1708
72	32	51	64	63	68	77		72	197	315	220	389	419	216	241	306		72	63	46	122	57	80		72	90	121	91		73	59.1667	287.875	73.6	100.667		15.7406	83.4205	29.7204	17.6163		6.42608	29.4936	13.2914	10.1708
73	32	51	64	63	68	77		73	197	315	220	389	419	216	241	306		73	63	46	122	57	80		73	90	121	91		74	59.1667	287.875	73.6	100.667		15.7406	83.4205	29.7204	17.6163		6.42608	29.4936	13.2914	10.1708
74	32	51	64	63	68	77		74	197	315	220	389	419	216	241	306		74	63	46	122	57	80		74	90	121	91		75	59.1667	287.875	73.6	100.667		15.7406	83.4205	29.7204	17.6163		6.42608	29.4936	13.2914	10.1708
75	32	51	64	63	68	77		75	197	315	220	389	419	216	241	306		75	63	46	122	57	80		75	90	121	91		76	59.1667	287.875	73.6	100.667		15.7406	83.4205	29.7204	17.6163		6.42608	29.4936	13.2914	10.1708
76	32	51	64	63	68	77		76	197	315	220	389	419	216	241	306		76	63	46	122	57	80		76	90	121	91
[truncated: 3 more columns]

## Sheet: Figure 5D-Nucleation Rate
Fitting "Equation 1" (see Methods) to the curves in Fig. 5C:
Generates the initial nucleation rate (k), which is number of MTs nucleated/sec
equivalent to: number of new gTuRCs nucleating /sec
Nucleation Rates (k) in #MTs/sec
Buffer			Wildtype			F75A			L77A
	k (#MTs/sec)			k (#MTs/sec)			k (#MTs/sec)			k (#MTs/sec)
Dataset 1	0.631273		Dataset 1	10.3903		Dataset 1	1.8166		Dataset 1	2.01502
Dataset 2	1.3762		Dataset 2	24.6528		Dataset 2	1.6237		Dataset 2	3.53455
Dataset 3	1.01885		Dataset 3	14.882		Dataset 3	3.45739		Dataset 3	1.75583
Dataset 4	1.60878		Dataset 4	31.3085		Dataset 4	2.15088
Dataset 5	1.22136		Dataset 5	33.2744
Dataset 6	1.58417		Dataset 6	28.3941
			Dataset 7	28.8347
Mean Nucleation Rates (k) in #MTs/sec
	Buffer	Wildtype	F75A	L77A
Mean	1.2401	24.5338	2.26214	2.43513
Error (std)	0.372239	8.64969	0.826059	0.960903
SEM	0.151966	3.26928	0.413029	0.554778
Student's T-test, two-sample unpaired, unequal variance
	Buffer	Wildtype	F75A	L77A
p-value	1	0.000379521	0.0839377	0.156168
Less than p = 0.05?
Significant?	FALSE	TRUE	FALSE	FALSE

## Sheet: Figure 5E-MT_growth_speed
Manual MT growth speed measurements
Buffer (n = 355 MTs)		Wildtype (n = 2303 MTs)		F75A (n = 368 MTs)		L77A (n = 302 MTs)			Buffer	Wildtype	F75A	L77A
µm/min		µm/min		µm/min		µm/min		Mean speed	2.1943	2.43014	2.11893	2.69371	µm/min
2.639		2.6371		1.3294		2.3869		St. deviation	0.80875	0.879488	0.629482	0.782045
1.6964		2.59		2.2687		1.2709
2.5659		2.0419		1.4669		1.9934		Student's T-test, two-sample unpaired, unequal variance
1.4643		2.1991		1.6015		2.1073			Buffer	Wildtype	F75A	L77A
2.1654		2.1443		1.305		1.2107		p-value	1	6.13997e-07	0.0817371	4.62765e-15
2.4906		2.4287		1.9995		2.3869		Less than p = 0.05?
2.8374		1.6968		2.6796		2.9128		Significant?	FALSE	TRUE	FALSE	TRUE
2.9808		2.4023		1.5654		2.5037
2.5899		3.3776		2.1392		2.0419
2.1933		3.9155		2.5759		2.7491
2.1758		2.734		2.4626		2.802
3.0006		1.7775		2.0792		1.8034
2.7754		3.129		2.6204		2.1054
1.5125		1.7968		2.0295		1.3639
2.8864		2.909		1.2096		2.1149
2.4805		2.5404		3.3209		1.9629
2.3982		2.533		1.7481		3.8944
1.8394		2.4578		1.6301		3.4547
1.8274		2.4456		2.01		2.8642
1.8133		3.5569		2.352		2.0867
2.3334		1.4472		1.8186		1.6295
1.2808		3.3271		2.4853		2.6879
2.1068		2.3512		2.5374		3.3416
2.4557		2.5733		2.4586		2.0402
1.7014		2.2452		1.6416		2.723
0.9923		2.9455		2.6209		5.7756
2.2223		2.3708		2.3717		4.1372
1.6848		2.0228		1.8047		2.8864
2.3445		1.941		1.6362		2.297
4.0099		1.6744		1.2979		3.2195
1.7901		1.8068		1.4568		2.8964
3.3183		4.0551		1.2539		1.9167
1.6604		3.7284		2.0314		1.5574
2.4607		2.5705		1.5052		2.6685
2.1031		2.9532		2.4415		2.4122
1.6367		3.0951		2.2518		4.384
1.9205		2.3675		3.8787		2.0755
1.2583		1.8666		2.0314		3.2273
2.6585		3.3026		1.8525		2.1243
1.954		3.4387		2.3454		1.9819
2.1346		3.7129		2.2277		2.9987
1.9622		3.1548		2.2935		2.2557
2.0333		2.401		2.6484		1.6848
2.2114		2.1217		2.1137		2.183
1.5638		3.1213		3.0057		2.8642
2.7695		2.2561		3.2502		1.1232
1.3931		2.3668		2.4836		2.0809
1.5912		2.8521		2.1013		2.078
2.6039		2.5647		1.3432		2.6338
2.3697		2.1167		2.0846		2.2691
0.8911		2.9947		1.6044		1.8273
1.8516		2.0125		1.3113		1.9353
2.6142		2.1543		1.721		2.1217
2.0421		2.4721		1.6291		2.1895
2.8642		2.7123		2.2791		2.4084
2.6115		4.2146		1.5634		2.4273
1.883		3.9402		1.9975		1.6006
1.2115		2.5528		2.8439		2.4179
1.7653		2.5646		1.8704		2.6304
1.4355		2.2758		2.4684		1.6939
4.698		3.0234		1.8599		2.5546
2.2217		1.9006		2.0983		2.533
1.3891		1.8785		1.675		2.0831
1.3687		3.5625		2.3394		2.3749
2.5334		1.3616		2.1511		3.0313
1.7872		1.5912		2.2385		2.3869
6.0842		5.3964		1.9731		2.0414
1.1227		2.5847		3.9313		1.9378
1.6693		2.8807		1.0492		2.0213
1.6157		2.9057		2.4256		2.1181
2.5987		3.2322		1.515		1.7933
1.8978		3.2314		2.6824		3.3611
3.2326		1.8826		1.9891		1.6387
1.8864		3.045		1.6451		2.6282
2.3539		2.6255		1.4545		1.9235
2.1912		2.4787		1.0812		1.4545
2.1554		2.0428		1.404		2.7898
1.7836		2.4156		1.5376		1.8377
1.3245		2.814		0.9628		2.4161
1.4738		1.9672		1.4183		4.531
0.9877		2.4863		1.5758		3.9187
1.566		2.5753		1.8878		4.6942
1.7518		3.1029		2.3293		2.6544
2.1217		3.0742		4.1862		3.3978
3.9653		2.4721		2.1288		4.1249
2.281		2.2122		2.177		1.8609
1.8092		2.6096		3.3534		1.6575
1.0893		3.2213		1.4539		1.738
0.9427		3.3416		1.5534		2.3555
2.1181		3.314		0.7161		2.7006
1.3232		1.3904		1.4708		2.5318
3.7687		2.25		1.2629		2.0716
2.1099		2.4721		2.2853		3.3989
2.5005		2.4984		2.1959		1.5482
1.8943		2.5837		2.8773		2.9116
2.7493		1.8958		2.5957		3.493
1.3346		2.6791		1.7576		2.6187
1.1437		3.3578		1.5847		1.9095
0.8371		4.4387		1.7456		3.2086
1.4864		2.5062		2.1141		1.3663
1.5406		2.7135		1.3639		3.9268
2.2277		2.9026		2.5951		2.3869
1.2783		3.758		3.015		2.7248
1.9569		3.0057		2.4906		3.6214
1.5566		3.6296		1.1934		4.4034
1.8816		2.9343		2.9218		1.8075
2.4813		3.873		2.8208		1.9958
1.3681		1.8195		2.9293		3.1357
4.6291		1.496		1.9362		3.2863
1.8186		2.4127		2.0764		2.3293
2.2866		1.4788		2.2194		3.4311
2.4437		1.6848		2.8064		2.5941
3.4098		2.2033		1.5319		2.2695
1.3559		1.9606		2.2377		2.3464
2.2007		2.9108		1.8885		3.0601
1.1016		2.6266		2.4685		1.659
1.6053		2.6588		2.4995		1.4428
5.5693		2.0412		2.3711		2.6722
2.8999		2.1421		1.6362		2.511
1.9891		3.3787		1.8741		1.1809
1.701		1.4866		2.3869		2.6039
2.9293		2.8153		2.2261		2.6811
1.6006		1.2391		1.515		3.5525
1.9539		1.6461		2.3869		1.5912
1.273		1.9597		1.8778		2.5203
1.1201		2.3123		2.4514		2.3272
1.8726		2.4328		2.5749		2.8553
0.9187		2.511		2.5644		2.6521
1.4321		1.822		2.533		1.579
1.9873		2.5705		1.7851		2.0356
1.8321		2.6872		1.7386		2.3224
2.8262		2.4146		2.2033		1.9498
1.0353		2.5074		2.1438		1.785
1.3046		2.9485		1.7642		2.8642
2.2465		1.9594		2.3457		3.4885
1.0989		1.1654		2.1474		1.7496
1.0729		2.0033		2.3681		2.5925
1.9382		2.5171		1.6904		2.5396
1.7308		3.368		2.3253		2.128
1.9177		2.0921		2.5556		1.8075
0.8951		2.1339		2.5615		2.7541
1.9438		2.1521		1.3815		2.2365
1.3095		1.3694		1.0678		2.1329
1.8328		2.1522		1.5912		3.2493
2.2422		3.0017		1.4899		1.5451
2.192		2.7876		1.2553		2.4948
2.4112		1.6246		2.0412		3.1223
1.7544		2.9766		1.0974		3.2558
3.0563		2.1253		3.1398		2.7145
1.9821		1.5003		2.0686		2.7749
2.3632		2.2164		1.717		2.396
1.9095		2.8841		3.3607		2.6982
1.9357		2.9717		2.0225		2.5725
2.239		3.6466		2.1065		1.9131
2.2323		3.6165		2.8864		1.8739
1.4003		2.8996		1.4575		2.7754
3.275		2.8026		1.2225		3.155
3.4337		2.7803		2.4082		2.1912
2.5273		3.0918		1.9211		2.3869
2.6408		4.4815		0.8951		1.8964
2.1261		1.5748		4.6245		1.8274
2.8319		1.5438		1.748		2.6644
2.3012		2.3521		2.139		2.2747
1.802		3.5895		1.6679		2.3869
2.0962		1.8282		2.0482		2.696
2.9401		2.175		1.4725		1.9095
1.4439		2.9187		2.2203		2.7094
2.1306		2.5622		4.2596		2.3246
1.9382		3.6394		2.1508		1.836
2.8642		2.6501		1.8125		5.2733
2.2219		1.9211		2.0708		3.9118
3.2131		2.6312		1.2425		2.213
2.6558		2.3118		1.4864		2.887
1.9138		2.1424		1.7359		3.3334
2.2234		1.8237		1.961		2.6521
2.1554		2.4371		2.2465		1.725
2.8028		3.6753		3.7898		3.3229
5.0318		1.4321		1.6169		2.1011
2.8729		3.4919		1.4397		3.4013
2.8669		1.7299		1.8399		1.545
4.4045		4.4512		3.5874		2.4163
2.1298		2.1622		2.2675		2.8115
2.5717		2.0975		1.9576		1.9522
2.2553		1.868		2.3563		2.0218
2.5962		1.8438		2.5024		2.2764
1.7404		2.4474		2.6353		3.5971
3.526		2.4497		1.6405		3.0355
1.7193		2.4352		2.515		2.9947
2.9173		2.1648		2.8446		2.4175
2.6588		1.7321		2.8384		1.9861
2.696		1.5492		2.5811		3.4187
2.27		4.4445		2.1586		2.5748
2.41		1.0962		2.0134		2.19
1.5246		3.1576		2.8642		2.1195
3.0552		2.4678		1.6009		1.805
3.2419		4.3993		2.9975		2.5273
2.8242		1.6127		2.3193		2.781
3.0889		1.9597		2.2395		2.3569
2.1482		2.8564		1.9211		2.4131
3.1155		1.7778		1.9279		3.9058
2.8881		2.8153		2.2661		3.4421
3.5152		3.0951		2.2353		2.6884
2.8463		2.5077		3.7129		2.6623
2.7847		2.8642		1.538		2.2612
1.5618		2.3869		2.33		2.3069
2.4942		3.3957		2.6142		3.104
2.3727		1.8816		2.111		2.7082
2.467		2.7637		2.4649		3.9612
4.7737		1.4992		3.0081		1.8247
1.1038		1.7261		3.2086		2.278
1.7005		1.5175		2.1261		2.1681
1.8328		2.4084		2.0503		2.9572
3.0042		4.012		1.1382		2.6521
2.1898		1.2659		2.2277		2.0625
3.3814		2.2643		3.0499		3.2682
2.0912		2.9766		2.7179		3.5132
2.3869		3.9268		1.8697		3.1825
2.5491		3.163		2.7718		3.3814
2.2072		1.6051		1.8533		2.5679
4.828		2.4761		2.3078		4.4672
1.8937		3.1825		3.2186		2.5195
1.4294		3.8377		2.0228		3.5007
1.9694		3.6611		1.4192		2.4465
2.3751		1.3799		1.6848		3.0727
1.7866		3.9587		2.4382		3.5803
2.0486		2.0695		2.8309		4.3645
1.8988		1.5524		1.9793		2.6902
1.9564		2.6326		2.2641		3.4499
0.9064		6.2203		1.901		3.0071
3.2734		1.8464		4.1465		2.6958
2.4782		2.9772		1.4815		1.9211
1.547		0.7889		2.005		4.0278
2.721		1.4373		1.5091		3.5691
2.1348		1.5515		2.6733		2.1004
2.1317		3.0413		2.5876		3.137
0.9391		2.1183		3.1709		3.1994
2.0415		2.1959		1.7194		2.7796
2.5631		3.5652		2.2856		4.9328
2.211		2.7153		1.9428		3.5569
3.8409		2.4799		2.8182		2.7468
5.036		2.3099		2.072		4.2855
2.4156		2.9879		1.9606		3.2182
1.8794		1.3908		2.4937		2.2821
1.8704		3.1825		3.4028		2.5655
1.0061		2.2366		2.5166		3.8383
1.1255		2.5931		2.4487		2.3243
1.2014		2.8745		2.8131		3.3938
2.6142		2.3869		1.9711		2.7657
2.602		1.9423		2.2021		3.0715
3.0688		2.0156		2.5969		2.9032
2.1699		1.6645		2.4673		4.1875
2.4775		1.9963		2.6912		2.8242
2.3996		2.6521		1.5057		4.7019
1.4904		2.5766		2.9662		3.3789
2.7405		2.2345		3.0107		2.0951
1.7854		1.3894		2.446		3.467
2.003		2.3371		2.2477		3.0272
1.6995		1.6244		1.5818		2.6096
1.5588		2.2194		1.6927		3.1896
2.8918		2.8642		2.8932		3.3179
3.0889		5.9925		2.69		1.4426
1.8637		2.6134		2.1084		3.3102
2.5882		2.116		1.7826		2.7977
1.094		3.9313		2.5432		2.8642
3.01		1.5912		1.4512		3.2574
4.7737		1.1075		1.7515		3.8787
1.6088		2.2636		1.6708		4.6128
2.2307		2.2505		1.5218		2.7904
2.1607		3.2574		2.5733		3.1017
1.4112		2.2465		2.5949		2.8533
2.5419		1.5793		2.145		2.4986
1.8082		3.6888		2.0654		2.4344
1.7267		3.3209		2.118		4.7195
2.4551		3.1262		2.6721		2.5644
1.8479		2.4388		2.4558		3.5943
1.7428		1.5784		2.113		3.0727
2.3869		4.1868		2.2819		2.446
1.2128		2.1185		1.9564		3.7571
2.2229		0.9321		2.269		2.2122
3.0563		1.2035		3.1967		2.4668
4.3191		1.9866		2.349		3.7526
3.3359		1.8282		2.0596		2.0459
2.3286		2.4753		2.0416		3.23
2.6472		2.5027		1.9766		1.7296
1.9163		3.385		2.3136		3.4636
2.1662		1.9922		1.9623		3.5277
1.4888		1.2818		1.3787		2.6839
2.9406		1.9657		1.7314		4.0544
2.7032		3.3326		2.0438		1.413
2.467		1.2247		3.8346		3.2587
1.2748		2.5062		2.3118		3.9966
2.1269		2.2732		1.8047		2.5637
2.0175		2.4232		1.6649		3.4568
2.8999		4.3896		2.0734		2.9134
1.3447		4.5789		2.0983		2.5962
2.4225		3.9943		2.3869		2.9695
1.2485		3.1029		1.7459		3.1113
1.7999		2.3145		2.3557		3.1432
1.2376		3.2961		0.9291		3.4699
1.6549		5.3655		1.2311		1.5221
2.3322		1.7731		2.7462		3.7687
1.662		4.0265		2.1271		3.7687
1.8959		1.6306		1.7478
1.7169		2.8518		1.6334
1.8736		3.2043		1.8402
2.0658		1.1934		2.4115
1.8525		3.4518		5.2077
2.6653		2.2107		1.8158
1.1787		2.3355		2.1399
1.7329		2.4105		3.6614
1.3883		2.1156		2.5574
1.9215		3.3611		1.3842
2.3089		1.9829		1.6438
2.1167		2.0541		1.6387
1.1481		0.3644		1.5862
3.4311		1.6127		2.0178
3.2886		2.8026		2.3869
2.7617		1.5762		1.6754
2.4787		2.8253		2.3123
1.4356		1.872		1.5661
3.2461		2.5255		1.9783
2.0042		2.1379		2.0838
2.2299		2.5665		1.3894
1.9622		1.8768		1.4214
2.0734		1.5003		2.5134
1.8839		2.3016		1.8377
1.9419		2.8812		2.0907
1.5169		2.1679		1.4634
2.3534		2.8807		1.5092
2.8524		2.524		2.1954
1.9925		3.3015		1.3019
2.3617		1.967		2.6521
1.9193		2.098		2.9149
2.1814		2.2791		1.6372
1.0747		2.3869		2.4287
1.6132		3.4718		2.0667
2.0519		1.8691		2.4325
1.3743		2.4337		2.1134
1.641		1.4437		2.4043
0.8832		1.0608		1.7983
1.5912		3.1825		1.7712
1.4023		2.0606		2.7199
2.1323		2.178		1.6999
3.0111		2.8344		1.8335
4.0835		1.836		2.2303
2.2985		2.4964		1.2562
4.3759		2.0755		1.39
1.7717		2.2557		2.4551
2.0608		2.2898		1.1785
1.3931		2.0215		1.2906
2.2971		4.4407		1.257
1.3808		2.1837		1.3544
2.4105		1.9869		2.01
1.3278		2.049		1.755
1.2052		4.1411		2.2612
		2.2868		1.7318
		1.9834		1.7709
		1.6549		1.7227
		2.0213		1.3528
		3.7823		1.6867
		1.879		1.9285
		3.493		1.4411
		1.3283		1.5658
		1.7901		1.4144
		2.768		2.9406
		3.0095		1.3544
		2.7661		1.0721
		2.6178		1.9231
		2.6072
		1.5035
		1.7901
		1.1437
		7.9562
		2.8112
		2.1298
		1.7833
		2.1625
		2.5655
		3.2488
		1.9873
		2.2007
		3.9937
		3.8909
		1.9825
		1.7975
		2.4877
		1.7812
		9.3673
		1.8618
		0.8311
		2.0619
		1.9958
		2.424
		1.7302
		2.5144
		2.6106
		1.6085
		1.4807
		2.2385
		3.3461
		1.5317
		2.2154
		4.9051
		2.6075
		1.5432
		2.3401
		4.664
		1.6264
		1.2065
		3.0987
		1.4613
		1.8741
		1.9365
		5.8941
		2.6936
		1.5912
		4.7245
		2.4715
		2.7135
		1.4759
		2.5243
		1.3785
		1.9393
		2.6963
		1.8171
		2.0333
		3.8751
		3.2264
		2.3338
		2.6688
		1.3537
		3.3271
		2.0964
		2.1867
		1.5912
		4.0627
		2.2067
		1.1457
		3.3326
		2.1399
		3.1486
		1.5753
		2.3249
		1.5758
		2.7315
		5.2407
		4.1456
		2.8794
		4.0918
		2.9324
		5.2651
		2.3082
		2.8902
		3.2178
		4.0727
		5.8437
		3.8346
		3.2255
		1.3044
		1.8054
		4.9813
		2.4308
		2.9874
		2.8393
		2.5605
		3.9943
		1.7936
		2.5677
		2.8886
		2.1948
		3.0951
		4.2074
		3.4141
		4.7737
		6.4198
		4.5009
		1.8241
		2.3164
		2.7138
		2.0599
		3.9725
		3.4031
		2.0395
		1.1983
		3.526
		2.91
		1.8099
		2.198
		2.9036
		2.3196
		5.0124
		2.0903
		3.0057
		2.1508
		3.7198
		1.9529
		2.8564
		2.5936
		3.3351
		2.0241
		2.5195
		2.0142
		2.8475
		2.8961
		2.113
		2.3224
		3.4772
		2.1093
		2.4787
		2.6521
		2.6449
		1.4293
		2.2543
		3.1825
		2.2685
		2.1678
		1.5703
		3.654
		2.7718
		2.2767
		2.546
		2.5642
		3.1029
		4.7737
		2.9675
		1.905
		2.4507
		4.0561
		3.0688
		3.2912
		1.2093
		1.6204
		2.4125
		2.5115
		1.5052
		2.5928
		3.4718
		1.1619
		3.2099
		4.0551
		4.9522
		2.8894
		4.1578
		2.2154
		3.0123
		2.1013
		3.1029
		4.1372
		2.5705
		3.1276
		3.2745
		2.9173
		5.1409
		2.9258
		3.7226
		2.4384
		2.3671
		3.4205
		1.2402
		1.7376
		3.475
		1.7177
		2.4399
		2.3706
		2.3959
		3.4568
		3.7571
		1.678
		1.868
		2.8095
		2.2632
		3.0107
		2.9723
		2.5205
		1.9701
		1.7469
		2.7503
		1.8099
		2.3422
		3.9966
		2.6881
		2.3064
		8.8473
		1.5841
		3.1383
		2.317
		1.4423
		3.0278
		2.5301
		1.9023
		2.8757
		3.0299
		1.9016
		2.4212
		3.0851
		2.4535
		2.8232
		4.6676
		2.7379
		2.6444
		1.7921
		2.3187
		2.1115
		2.5609
		4.2245
		3.1706
		4.7737
		2.1699
		2.1728
		3.1055
		2.5705
		2.8081
		2.7123
		2.4538
		3.0406
		2.3464
		1.4541
		1.8638
		2.2543
		2.3869
		3.3315
		4.3483
		1.9891
		2.4922
		2.1344
		3.9277
		2.4967
		1.7952
		2.136
		4.7737
		3.3727
		3.2662
		1.224
		3.6913
		1.8431
		1.987
		1.8909
		2.5662
		2.349
		2.3689
		1.6917
		3.4799
		2.4639
		2.7637
		2.5598
		2.9017
		2.0306
		1.2096
		3.2593
		2.7626
		1.6478
		2.7278
		2.0614
		2.7588
		3.332
		4.9622
		2.0926
		2.9145
		2.1984
		3.9841
		2.2227
		2.4218
		2.7623
		1.8341
		2.4711
		2.5891
		2.5563
		3.3255
		2.1823
		1.9634
		4.0828
		2.6824
		2.0765
		2.4966
		2.531
		1.8747
		2.9615
		1.934
		2.7666
		3.4433
		3.8315
		1.9362
		3.172
		1.675
		2.15
		3.5666
		2.98
		2.7085
		5.0422
		2.6148
		2.8852
		1.9529
		2.6431
		3.6996
		1.7303
		2.671
		2.3199
		3.1665
		4.0599
		1.7901
		2.1053
		3.1652
		2.8107
		1.9963
		2.9108
		1.7418
		3.087
		2.0353
		5.2792
		3.9996
		2.8972
		2.4656
		4.7125
		3.3904
		2.5772
		1.2665
		1.8609
		2.1447
		1.2983
		1.7621
		2.9123
		2.2612
		2.4986
		2.9104
		2.4481
		3.4885
		1.4444
		3.9313
		2.5813
		2.4715
		2.2047
		1.6621
		3.5921
		1.5312
		1.3056
		2.4906
		2.5804
		1.4856
		2.5027
		2.8642
		2.8191
		2.3711
		3.9781
		3.9291
		2.345
		1.4717
		1.0009
		1.1779
		1.7859
		2.0777
		1.6723
		2.4773
		1.523
		2.1654
		3.9058
		1.4668
		2.3745
		1.715
		2.9138
		3.1825
		3.6256
		4.2903
		1.9915
		3.6584
		1.7238
		4.5114
		2.2223
		1.4224
		4.4493
		3.9863
		2.192
		3.3661
		1.5326
		2.963
		2.9744
		1.497
		1.7642
		2.2732
		2.7379
		2.3099
		2.1768
		2.6658
		1.6083
		1.7335
		1.9058
		3.1486
		2.6326
		2.1123
		1.3187
		3.6929
		2.9467
		2.8439
		4.48
		1.5041
		2.4112
		1.1934
		3.1406
		2.0885
		0.9757
		1.2047
		2.3692
		2.2407
		1.4711
		3.1825
		2.2689
		1.6575
		3.3934
		2.4225
		1.9622
		1.3516
		2.1382
		2.8873
		0.5543
		1.7254
		1.2048
		4.1875
		5.4647
		2.8642
		1.0608
		1.9866
		3.4439
		1.5241
		2.6521
		3.6763
		2.8642
		3.353
		2.9777
		1.9428
		1.0771
		1.822
		2.7417
		4.3222
		1.5155
		4.1712
		1.4253
		2.1617
		2.5534
		1.8516
		3.99
		1.128
		2.711
		2.15
		1.4052
		1.4736
		2.3459
		1.1612
		2.0071
		1.435
		2.3099
		1.8205
		2.1177
		2.01
		4.8167
		2.0397
		2.1187
		1.5751
		3.1328
		2.8103
		2.1641
		1.5736
		1.262
		1.545
		0.6434
		2.2732
		2.1754
		2.3523
		2.1217
		3.2662
		1.8479
		2.567
		1.2453
		1.4346
		1.6568
		2.5005
		2.2684
		1.2618
		1.6931
		3.1475
		2.9352
		2.3869
		1.0401
		5.4557
		2.5753
		1.5626
		1.2716
		3.3192
		2.8911
		3.6454
		1.4564
		2.7954
		1.8668
		3.5803
		3.2378
		1.1819
		2.1217
		3.4592
		1.8519
		1.8689
		2.2846
		2.7405
		5.3559
		1.1508
		4.1669
		2.7556
		2.692
		2.4717
		2.9116
		1.1588
		0.9141
		1.9718
		3.923
		0.936
		1.9095
		1.8782
		4.3147
		2.0509
		2.2087
		3.3246
		1.807
		3.7846
		3.9639
		2.5071
		1.2227
		1.7556
		3.7598
		2.2465
		2.3022
		1.4873
		1.9576
		1.9891
		1.8896
		1.7164
		1.4158
		2.826
		1.9095
		3.3474
		5.4978
		1.3604
		2.0252
		3.5318
		1.0022
		1.5256
		2.2422
		2.2492
		2.8932
		1.1511
		3.5874
		1.851
		2.8709
		3.39
		1.7822
		1.9316
		0.9451
		3.6005
		1.6642
		5.1354
		3.819
		1.4738
		1.2212
		4.0169
		2.1793
		2.3566
		4.2596
		1.5536
		3.3465
		2.5591
		1.6524
		1.2747
		2.1814
		2.0937
		2.4906
		1.2462
		1.6832
		2.8313
		5.6161
		2.1482
		2.1898
		1.8336
		2.4128
		1.3938
		2.0545
		2.6929
		2.4692
		1.8241
		2.3581
		1.6587
		2.7278
		3.8065
		1.6207
		6.6563
		0.8533
		3.0688
		2.1783
		1.8299
		1.5912
		1.1327
		1.1885
		1.7834
		1.2941
		1.6524
		1.903
		2.0019
		2.6079
		1.667
		2.8153
		2.0561
		2.567
		4.9473
		2.8036
		2.2211
		2.4502
		1.9929
		1.3238
		1.53
		1.3914
		3.7928
		1.6439
		3.053
		3.2314
		2.5906
		2.0178
		2.335
		1.4373
		1.4214
		2.6096
		2.9419
		0.9877
		1.7839
		2.0019
		2.4656
		2.8239
		0.8211
		2.0843
		2.1123
		2.3314
		2.2203
		1.7936
		1.3987
		2.5306
		2.4481
		1.6674
		2.1588
		3.0478
		2.8289
		1.6883
		1.0518
		2.2465
		1.2677
		1.9184
		1.3056
		1.7245
		1.516
		1.1696
		2.8178
		2.9069
		2.0118
		3.1118
		2.4521
		3.0582
		3.7628
		3.6763
		4.0055
		2.7515
		3.1709
		1.5615
		2.2277
		2.9963
		1.6725
		2.2716
		1.836
		2.9333
		2.4007
		1.2453
		2.5508
		1.5968
		1.6301
		2.1534
		2.4349
		3.783
		2.8355
		1.5499
		2.4742
		1.9419
		1.2434
		3.0707
		2.2634
		2.0608
		1.5177
		1.6579
		1.5418
		2.5705
		2.5741
		1.0768
		2.2933
		1.0522
		1.4133
		2.5655
		2.0755
		2.9896
		2.4415
		1.523
		1.5258
		1.6287
		0.8918
		1.8329
		1.239
		2.0771
		2.2485
		2.2956
		1.9208
		2.0851
		1.5252
		2.1053
		2.2528
		1.7691
		1.1845
		2.4441
		3.9129
		1.0978
		1.2003
		2.6688
		2.2518
		2.1551
		2.751
		2.0268
		2.1111
		1.9428
		1.8773
		1.7063
		3.0538
		2.1237
		2.461
		2.704
		1.4167
		2.2675
		2.6824
		2.5574
		2.3115
		1.9272
		3.1525
		1.7822
		1.9262
		3.5691
		1.7642
		1.949
		2.2361
		1.9095
		2.8642
		2.5088
		0.7359
		2.4457
		2.1574
		1.9245
		2.0975
		1.5033
		1.9972
		1.8909
		2.3869
		1.8428
		2.6362
		3.2156
		2.1793
		0.8964
		2.755
		1.5344
		2.2277
		1.9517
		2.7208
		1.8844
		1.5667
		3.7836
		4.1819
		1.6287
		2.0775
		1.9491
		2.0962
		3.4098
		2.8642
		1.8028
		2.6972
		2.5325
		2.8229
		2.3394
		2.4906
		1.8915
		2.7405
		1.7185
		1.6892
		1.763
		1.9567
		1.4406
		2.8475
		1.7833
		2.7187
		1.8873
		2.0656
		2.9212
		3.7593
		1.9934
		3.0846
		1.5602
		3.2641
		1.8992
		2.1298
		1.9479
		3.1825
		1.9304
		4.2712
		1.8715
		2.01
		1.8732
		2.2296
		2.9227
		2.1768
		2.4481
		3.6482
		0.4805
		1.5722
		1.8198
		2.2894
		1.4717
		3.0201
		1.8305
		1.7901
		2.696
		3.0712
		1.7271
		3.6252
		2.01
		2.3505
		2.038
		1.4363
		2.1747
		1.6536
		1.8195
		0.4177
		1.7167
		2.5152
		2.8232
		2.6521
		1.4992
		2.0073
		1.5041
		2.5386
		1.7626
		1.4072
		2.7815
		2.0148
		1.9095
		2.7478
		3.5958
		1.7049
		2.9569
		2.5439
		2.2143
		2.7847
		2.9723
		1.4586
		1.4688
		3.3108
		2.1261
		2.6766
		4.9101
		2.3407
		2.5337
		3.2406
		2.3625
		1.8429
		2.6751
		2.7009
		1.5268
		1.4962
		2.1037
		2.1015
		1.9279
		2.6444
		2.1944
		2.2849
		2.4592
		2.4933
		2.1145
		2.0424
		3.2761
		1.3758
		1.8951
		1.9934
		3.1175
		1.4558
		1.6653
		2.8964
		1.7113
		1.0849
		2.8459
		1.9959
		3.7207
		2.3623
		1.9387
		1.9519
		2.5055
		2.3435
		2.078
		1.4545
		2.7818
		1.2587
		2.5763
		1.8896
		1.9726
		2.7607
		1.3819
		1.0658
		2.3187
		1.5675
		3.3919
		2.1068
		3.0499
		2.4649
		1.9542
		2.9675
		2.9057
		2.9149
		1.5366
		1.0674
		2.7202
		2.2339
		1.3587
		3.1917
		2.2704
		5.342
		1.6518
		1.1789
		3.259
		1.8906
		2.6322
		1.7512
		2.5103
		3.1825
		1.5832
		5.0165
		3.8525
		2.6362
		2.3706
		2.0983
		4.0604
		2.8208
		3.015
		2.4
		1.9368
		2.2968
		2.1941
		3.0646
		1.4263
		2.7882
		2.7105
		1.9436
		1.7861
		3.7508
		3.1825
		6.1449
		1.4537
		3.6534
		3.2761
		3.3377
		2.8698
		2.3606
		1.6967
		2.1586
		3.0688
		1.9095
		3.0333
		2.0716
		1.8859
		3.9678
		2.5188
		2.0197
		2.5074
		1.5784
		2.7693
		2.6733
		2.1482
		3.4353
		2.6444
		3.5659
		1.5491
		1.2391
		2.4205
		2.5975
		1.3099
		5.1669
		3.5382
		2.2016
		1.5912
		2.2231
		2.3145
		3.2843
		3.3151
		1.6759
		1.5537
		2.4376
		2.2087
		2.412
		2.6014
		2.2179
		1.6604
		2.7847
		1.9692
		3.7728
		1.9539
		2.0755
		1.7958
		3.3271
		3.2502
		2.1041
		2.463
		3.0688
		2.4782
		1.5983
		2.5705
		2.2033
		2.3869
		2.1033
		1.0126
		2.1178
		2.2892
		1.2624
		1.9462
		1.6562
		2.2067
		3.7762
		2.9997
		1.8273
		1.5617
		2.6277
		2.2767
		2.5421
		1.5117
		1.6813
		2.0948
		3.2697
		2.2033
		1.326
		2.3026
		1.4286
		2.4558
		1.1031
		3.8353
		2.4143
		3.1989
		2.2033
		3.5418
		3.1406
		1.2547
		2.9138
		1.8548
		2.3581
		2.4863
		1.9529
		1.8252
		3.0068
		2.8642
		1.9259
		3.6445
		2.7954
		2.2675
		2.7145
		2.4753
		2.0643
		2.5813
		2.6187
		2.2745
		2.9377
		2.323
		3.0089
		2.0459
		1.9891
		1.1406
		1.7856
		1.4901
		2.0809
		1.1515
		1.9034
		3.0718
		2.2593
		2.6126
		3.8596
		3.6888
		1.4586
		1.4824
		2.0755
		2.2951
		2.5632
		3.053
		2.7613
		1.6824
		2.4526
		3.1825
		2.3016
		3.685
		3.7235
		1.9945
		2.6009
		3.0912
		3.69
		2.2549
		1.4459
		2.398
		1.6532
		2.2636
		2.0738
		3.35
		2.8814
		2.7588
		2.1375
		1.5411
		2.6757
		2.3689
		3.6578
		1.4447
		2.68
		1.1745
		1.7873
		2.6009
		1.8082
		2.6486
		2.2551
		2.274
		1.4554
		1.9712
		1.7901
		1.7901
		2.6039
		2.2164
		1.6374
		2.2704
		2.4225
		2.0382
		2.2732
		2.8319
		1.8078
		1.387
		2.2298
		2.4481
		2.3424
		1.5488
		5.2127
		2.2488
		1.9786
		2.1127
		1.0215
		1.6488
		1.6029
		1.8701
		1.7217
		1.893
		1.9983
		2.344
		4.0736
		2.9244
		1.6911
		3.0727
		1.2069
		1.7293
		1.7169
		1.5736
		2.2173
		1.218
		2.3594
		1.6963
		1.1612
		1.9167
		3.0345
		2.3719
		3.0129
		2.6408
		1.5552
		3.4553
		2.3418
		0.9583
		2.2033
		1.7396
		1.2303
		2.8983
		2.3869
		2.6958
		2.4772
		1.4242
		2.128
		1.3316
		1.15
		2.5705
		3.2876
		1.7205
		2.8319
		1.7812
		2.8313
		3.6358
		1.7936
		1.0813
		1.2107
		1.0946
		0.7323
		2.1952
		1.7853
		1.2485
		2.3623
		2.3136
		2.6667
		2.0851
		2.4914
		2.0067
		2.3734
		2.251
		1.9245
		1.9692
		2.1399
		2.2301
		3.6114
		2.222
		2.0867
		3.7129
		2.0241
		2.421
		3.3365
		1.3913
		2.0041
		2.7603
		3.872
		1.8092
		2.7705
		1.7329
		3.0129
		2.1811
		1.5262
		1.1397
		1.8107
		2.0885
		2.0343
		2.0264
		3.9251
		2.1984
		7.7289
		1.8782
		3.0822
		3.2393
		4.2741
		2.4823
		1.9891
		1.9143
		1.6085
		1.7809
		3.654
		1.7359
		1.7267
		2.3375
		2.0333
		1.3949
		5.442
		1.9594
		2.0008
		1.5052
		3.7861
		3.1591
		2.9005
		1.9974
		2.275
		2.1505
		2.2305
		2.5931
		1.6759
		1.6783
		1.3872
		1.3366
		0.9465
		2.6197
		1.2306
		4.2229
		1.692
		2.8642
		1.6146
		2.6426
		1.1993
		1.8656
		2.2882
		1.243
		2.0278
		2.5871
		1.5338
		1.9564
		2.0252
		2.8923
		1.4073
		2.6779
		1.7686
		3.4885
		1.785
		2.8905
		2.3418
		2.0734
		1.5857
		2.0863
		3.0095
		1.3079
		1.664
		1.6773
		2.3138
		1.3169
		2.8539
		1.0561
		1.4993
		1.7771
		1.7118
		3.5635
		2.2093
		3.3049
		2.8642
		2.1864
		2.0343
		2.6811
		1.851
		1.9548
		1.7822
		1.4835
		2.19
		1.5146
		1.0884
		2.4313
		1.5542
		1.7267
		2.7435
		1.7061
		1.8063
		1.8262
		2.8131
		1.7049
		1.7963
		2.1067
		1.411
		1.2938
		1.5846
		0.9798
		2.6216
		1.3605
		1.7901
		1.3348
		1.4073
		2.0858
		1.273
		3.6534
		1.6761
		1.404
		2.4163
		1.6342
		2.536
		1.788
		2.583
		1.9095
		2.1763
		2.4137
		2.0347
		2.2939
		1.6575
		3.39
		2.0597
		3.1406
		3.0921
		2.309
		1.5453
		5.5437
		2.0791
		2.3008
		3.0746
		4.8192
		3.3893
		2.6039
		2.0587
		2.9287
		2.0165
		3.635
		2.1823
		3.5132
		2.2377
		3.0272
		3.6165
		5.2
		2.2258
		2.3869
		1.4688
		3.1328
		2.2419
		1.4558
		2.6039
		3.0601
		3.0978
		2.5978
		1.8472
		2.8611
		5.3875
		2.9869
		2.9138
		2.0414
		2.3869
		1.9804
		2.0958
		1.901
		2.01
		2.4601
		2.7938
		2.518
		2.895
		1.9873
		2.5705
		2.4753
		2.2416
		2.6819
		3.5586
		2.3675
		2.2968
		2.7582
		4.4396
		2.1421
		2.8384
		3.5284
		2.4615
		2.0728
		1.7031
		1.2644
		1.7284
		2.0288
		2.3407
		3.0764
		2.1823
		1.1484
		1.8338
		2.9473
		1.6814
		2.3594
		2.9989
		2.09
		1.9853
		2.802
		1.9387
		2.6794
		3.2568
		3.6721
		2.4823
		1.6075
		2.0662
		1.6461
		2.1674
		3.0378
		2.3532
		2.3724
		1.8986
		1.5509
		1.7208
		2.3532
		3.3365
		3.819
		3.1825
		2.9282
		1.9535
		2.3637
		4.177
		2.9138
		2.8372
		1.3346
		3.0688
		2.6039
		2.1662
		1.3019
		2.3729
		2.6418
		2.7278
		1.1934
		2.3427
		3.1825
		1.836
		2.5082
		4.2872
		2.7944
		3.6721
		1.8107
		2.0118
		2.2139
		2.3943
		1.1317
		2.874
		3.1497
		4.2728
		2.7199
		2.9398
		2.612
		1.8635
		2.2585
		2.2277
		1.4886
		1.8292
		2.7278
		2.1823
		1.8536
		1.3141
		1.5699
		3.1513
		1.3867
		1.866
		1.462
		2.6852
		2.3738
		2.3343
		2.7847
		2.3556
		1.9466
		2.9448
		2.1852
		3.1911
		1.3534
		1.5658
		1.4635
		1.6689
		2.1725
		3.0851
		1.8549
		1.6387
		2.8377
		2.463
		2.0862
		2.1712
		3.0378
		2.1475
		1.3187
		3.7508
		1.8826
		1.9147
		2.2508
		2.2483
		1.8216
		2.0459
		2.3368
		3.0453
		3.8631
		2.9423
		2.0069
		2.8686
		2.4352
		1.4052
		1.6812
		1.9657
		2.6733
		2.2427
		2.8822
		2.1641
		2.6592
		1.9309
		2.4384
		3.2273
		2.3086
		2.0459
		1.7023
		2.9749
		1.7128
		2.9836
		2.629
		1.9718
		0.9803
		2.0149
		3.1463
		2.0527
		2.2437
		2.1988
		2.6014
		2.077
		1.8892
		1.5562
		1.9546
		2.1115
		3.6958
		1.9195
		2.4202
		2.8996
		3.6268
		3.698
		4.5684
		1.8656
		5.1506
		2.5345
		3.1092
		2.3974
		1.9657
		2.3671
		1.8313
		2.5705
		1.4492
		1.8265
		2.078
		2.2226
		2.2465
		1.9799
		1.4061
[truncated: 306 more rows]

## Sheet: Figure 5F-MT_lengths
Manual MT length measurements
Buffer (n = 355 MTs)		Wildtype (n = 2303 MTs)		F75A (n = 368 MTs)		L77A (n = 302 MTs)			Buffer	Wildtype	F75A	L77A
microns (µm)		microns (µm)		microns (µm)		microns (µm)		Mean length	3.19632	3.23783	3.2894	3.86897	µm
5.8478		3.5405		2.1084		3.4013		St. deviation	1.17347	1.1023	1.10504	1.38423
2.0089		4.1571		3.4013		3.7195
1.6111		3.5405		4.0577		2.7648		Student's T-test, two-sample unpaired, unequal variance
2.4266		1.7901		4.3759		2.2874			Buffer	Wildtype	F75A	L77A
4.9925		5.8677		1.7901		3.6996		p-value	1	0.532122	0.136481	6.55787e-11
3.7195		3.3018		2.2476		2.1084		Less than p = 0.05?
5.5495		2.5261		5.0522		1.4918		Significant?	FALSE	FALSE	FALSE	TRUE
3.4013		4.1571		4.8533		3.7593
5.3307		2.6852		4.177		4.8135
2.2476		5.6887		3.3814		4.6544
2.4664		3.3217		2.0885		4.0179
5.4898		3.4212		3.5604		1.8697
4.9726		4.177		5.0522		3.6201
4.2964		4.4754		5.0522		1.5515
4.7538		5.3704		3.083		1.6907
3.6002		3.5206		2.0288		3.8389
2.546		5.9075		3.3615		5.9473
1.9493		4.3958		4.3361		3.1228
3.0631		4.8135		1.2332		2.1681
3.819		2.8245		4.7538		3.0035
3.6599		3.1228		2.2874		4.0776
1.8896		3.7991		3.0432		3.6996
3.7792		2.725		4.6544		1.9095
4.7538		2.1283		4.6146		4.3162
3.1626		6.4644		3.3018		5.8876
4.4953		3.7593		3.461		3.0432
5.1516		5.808		5.5097		3.64
3.461		4.4555		1.81		3.6599
2.0885		5.9672		3.4013		4.4555
3.5206		3.6002		2.5659		3.7593
2.1681		4.7737		3.1825		2.1681
5.3506		4.8732		1.9692		4.9925
3.7991		4.8334		4.6942		5.2312
4.5947		2.9239		2.6454		3.8787
1.7305		4.6146		2.8245		5.3704
4.4953		3.998		6.0865		3.0432
3.8588		2.6454		4.2765		1.7504
3.6002		6.2257		2.4068		3.7593
5.1715		3.9383		4.5748		4.2964
3.0432		2.0885		3.3018		6.0268
4.7936		4.2765		2.7847		5.1715
2.7648		3.3217		2.1084		7.2004
3.262		1.8896		3.5405		2.0288
2.6852		5.9473		2.3272		3.5405
2.6057		2.7051		2.6255		5.987
3.3814		2.2675		0.8553		3.4212
1.8896		4.8334		3.2024		4.7141
2.5858		7.8766		3.9184		2.3073
3.1029		3.8588		3.2422		4.356
2.1681		4.2168		4.6942		6.7827
3.6996		3.1626		2.188		4.2367
2.8642		5.092		3.083		2.9637
2.2277		3.0234		4.1173		5.0522
4.1372		5.3903		2.904		3.0035
3.3615		5.1914		2.188		2.3073
3.8787		5.092		5.2312		2.5858
2.6057		3.1029		4.0776		1.7703
3.6797		5.7484		4.3759		1.2929
3.7991		4.4555		1.631		2.2476
2.0885		1.8896		2.4465		2.725
3.0234		1.273		2.7051		3.4808
1.9692		4.2964		2.367		4.1969
2.0288		5.4301		1.8498		5.1715
2.0089		1.8498		3.1825		3.0631
3.0035		3.6201		2.2078		3.2819
3.3416		2.7449		2.7051		3.7792
2.0089		3.461		1.8299		3.4013
2.7051		4.5748		1.9493		4.4157
1.8896		3.1427		2.4863		3.6599
2.4664		1.81		3.461		3.7792
2.7449		2.6852		1.3923		3.4411
3.4212		3.1825		2.6255		2.6255
1.8697		5.1715		1.9891		0.7757
1.6907		5.808		2.7847		4.7737
3.7195		2.5062		1.6509		4.4555
4.1372		3.4212		1.9692		3.1029
4.7737		3.998		2.5062		2.6255
3.1427		3.7394		2.8642		2.4266
1.8697		5.5296		1.7305		4.9328
3.5206		3.64		1.8299		3.8985
1.9294		2.725		2.8841		3.6599
3.5007		2.5659		2.8443		3.2024
1.81		4.177		2.1681		4.8533
1.9493		4.9527		2.8443		4.6544
3.2422		1.6907		2.4863		3.3615
4.2367		3.9781		2.188		5.7285
3.3018		3.6201		2.6454		2.725
1.6708		3.4013		2.4266		4.0179
1.8896		3.5803		1.8299		5.9274
2.7648		3.3217		1.7305		3.6599
2.0885		3.7195		2.3272		3.998
3.1029		4.0974		1.3526		4.8931
3.5604		3.8787		3.0035		3.9383
3.7991		5.6489		2.3471		4.9527
1.7901		5.1516		2.6653		3.0035
3.3615		5.1516		2.1482		3.6599
1.5714		4.5549		2.4068		4.5947
1.5316		3.7195		2.3272		4.5947
2.2078		3.262		1.5316		2.8046
1.6111		1.9095		1.6509		2.5062
3.3018		1.5515		1.8697		3.3018
3.6201		4.0378		2.3272		2.7051
3.3615		2.1681		1.6509		4.2964
3.5405		4.7538		1.8299		4.3162
1.9294		6.0268		2.3869		3.9582
2.4266		2.9438		1.8498		1.9493
3.083		3.083		2.9836		4.7737
3.2223		4.1969		4.4356		2.5659
1.4122		5.0522		4.177		3.7792
2.7648		7.0412		6.0666		5.5495
2.9438		1.8498		2.1084		2.8245
1.0542		2.0089		3.1825		5.8876
1.9891		3.5007		3.9781		3.0631
1.4918		3.1427		3.2223		4.7538
2.1482		3.4212		3.6599		1.8498
3.8787		3.6002		4.8732		5.6489
1.5316		4.5549		4.2964		3.5405
2.725		2.8841		2.2476		3.3615
1.4321		5.3108		3.2422		2.9637
1.3327		4.7936		3.4013		2.8245
1.1338		2.1681		2.2078		2.7648
2.5261		2.5062		3.1228		4.8135
3.5803		2.6454		2.7449		1.6509
2.725		2.4465		2.5261		1.3923
1.3526		1.2929		3.8389		2.4465
2.4266		2.1482		2.9239		2.7648
2.6255		2.3272		3.461		2.2078
2.2476		4.3759		3.4808		3.3217
2.3869		3.5405		4.1571		2.9637
3.4808		4.5549		2.8443		4.4555
2.7051		3.0234		3.2422		2.5659
3.262		3.5007		2.6057		3.6797
2.4068		1.6708		4.8732		2.9239
2.2476		2.2476		3.6002		3.9582
2.7449		2.2277		3.3217		2.7449
3.6201		3.3814		4.1571		4.8931
3.8787		2.3073		2.904		5.3307
1.7901		3.8787		4.2168		4.7538
2.5062		4.2964		5.8279		3.0035
1.81		4.8334		2.0487		1.5316
1.5117		3.0234		3.461		3.819
3.1029		5.7086		3.262		3.7593
3.5007		3.4411		1.7504		3.0631
1.6111		3.6797		2.0885		4.1173
1.6708		6.1263		3.9184		4.0378
1.6708		4.913		2.1084		2.7051
3.0035		3.8389		1.8896		2.8245
2.188		4.4356		1.6907		4.5947
5.8478		3.4013		3.3018		1.1735
4.1969		1.7703		2.4465		5.8677
1.273		3.1228		3.0432		6.2655
5.5892		3.0631		2.1681		2.725
5.0721		2.5261		4.0776		2.7449
4.1571		3.5007		4.7538		3.2024
3.3018		2.1482		2.4266		6.9219
3.7195		2.3471		2.725		5.7484
4.2765		3.4212		1.6111		4.8334
4.6345		1.5714		4.7936		5.3108
2.8245		4.0776		1.8498		3.3615
5.3307		1.6907		1.9493		1.0144
6.3053		1.4321		3.2223		0.8553
6.6832		3.6002		4.2964		4.8334
3.8389		4.4356		2.7648		1.81
4.535		3.083		2.9239		4.0179
4.5947		1.9692		4.7936		3.8389
3.8389		2.8046		2.1482		2.3073
3.9383		4.913		2.0885		2.2675
4.5151		2.6852		2.5659		3.5803
1.4122		3.5405		3.9781		4.6544
2.5261		3.9781		3.2223		5.5892
3.3814		4.2964		3.5405		5.2909
3.6002		4.3361		3.4411		3.461
3.9184		5.9274		1.7901		2.8642
3.3217		6.6037		2.3073		2.0288
3.8985		2.1482		3.7991		2.1482
5.9274		3.1029		2.4664		4.3361
6.6037		3.0234		3.6201		3.0432
2.5261		3.6599		2.7847		5.3108
5.1914		3.4013		3.1825		2.8046
6.0666		3.262		2.9836		5.0124
4.7737		2.0885		3.4411		3.4212
2.0686		1.9493		5.3903		2.7847
5.7285		4.7339		5.4699		3.4808
2.2277		4.3958		2.7449		4.2566
5.3903		2.7648		4.7936		3.6599
4.8931		5.5495		3.3814		4.2168
5.4699		2.6057		4.0378		3.9184
4.5748		6.6434		3.4808		3.9383
5.2113		4.356		2.188		3.5007
6.1064		4.7936		2.8443		3.3814
3.0035		3.3814		3.0631		4.9527
5.0522		3.9582		2.7449		6.1661
1.2531		3.5604		2.4465		3.3416
4.6345		4.7141		1.2929		5.1914
5.5097		2.3471		3.2819		3.1427
2.1283		3.3018		1.7703		3.8787
5.3704		3.8787		3.461		4.2765
4.1571		4.177		4.0378		3.3217
2.7449		4.5947		3.2819		3.0234
7.5584		2.1283		5.6091		5.092
4.5151		2.4664		4.0378		4.3162
2.367		2.0686		3.4212		4.1372
3.8389		4.9925		3.64		4.0776
2.8046		1.9294		2.5261		3.5206
1.7305		2.2874		4.2168		3.1626
5.0124		2.0288		2.9438		4.9328
3.0432		3.6996		3.9383		2.3471
3.7394		3.7195		5.5495		2.3869
2.0686		1.6509		3.0631		4.8533
1.8896		2.0885		4.0179		6.0268
2.7847		1.8896		4.1372		5.1119
2.8841		2.6653		1.8697		2.5261
3.4212		2.0686		2.0686		4.8931
2.0288		4.1173		2.9836		3.998
3.2024		4.8135		2.0686		5.7881
4.4754		2.0089		3.3615		6.0666
2.5062		4.0179		3.6797		2.725
1.6708		3.5405		3.0631		4.8732
1.2332		4.1571		2.5062		2.4465
2.1482		4.1372		4.1372		4.535
1.5714		1.3724		3.2024		6.365
1.4918		4.1969		1.7901		4.1173
4.8931		5.3903		1.6509		2.6255
4.9726		1.81		1.6509		3.4411
3.6002		4.4953		3.8588		4.2168
3.9781		3.4212		5.0323		5.4301
3.9383		3.5007		4.1969		2.4266
3.3615		4.8533		3.0432		2.1681
2.5062		4.0378		3.7792		5.092
3.3018		1.6907		2.9836		6.1064
3.1825		3.7195		2.5858		3.998
2.4068		2.2078		3.1427		6.4843
2.2078		1.3724		4.3958		3.083
4.7141		1.6111		2.1084		3.3814
4.7141		3.2422		4.1372		1.4719
3.0631		1.9095		2.367		4.1173
4.7737		3.1228		2.7449		4.535
2.4068		3.0631		2.904		4.1969
2.5261		6.3252		2.4465		3.8787
2.2874		3.6797		5.629		8.9706
3.4411		2.904		3.819		4.2964
3.7991		2.8046		4.3361		3.083
3.0234		1.7901		6.0467		2.9637
2.546		2.8841		4.4953		2.8245
3.0631		4.7141		2.188		6.9219
2.2078		2.2675		3.1228		2.8841
3.4013		2.9637		1.7504		3.819
3.1825		3.5206		1.9493		3.083
3.8389		3.0234		5.3903		3.461
3.5206		4.5151		2.546		6.9418
2.8443		2.4266		2.4266		5.1914
2.5261		3.461		4.8533		3.5803
3.2819		4.3361		2.8245		3.5007
2.3073		4.356		2.188		6.8224
3.7195		2.2874		3.9383		4.2964
3.9383		1.7901		3.1825		4.5549
3.5206		1.5515		4.8732		3.3416
2.8642		3.461		4.2367		5.3903
2.9836		3.8787		5.5097		6.2456
4.0974		3.2024		3.4013		4.7339
2.7847		3.5206		3.5803		2.3272
2.6653		3.2819		1.6907		2.9438
2.1681		4.8931		2.546		6.4644
2.2476		4.2765		3.4013		3.0631
4.4953		3.7792		3.7195		5.3108
4.6345		2.4068		2.7449		3.8985
2.3272		3.6599		5.9672		4.2964
3.8588		2.0686		3.9781		4.1372
3.6996		3.0234		4.9328		3.083
2.2078		4.356		3.4212		5.7086
4.1173		2.8841		4.0577		3.262
4.913		2.4465		4.7141		3.8985
3.1825		3.5206		4.5151		2.2675
2.8642		2.1681		2.1084		3.3217
1.81		1.7901		4.535		5.3903
2.7847		2.8046		6.5838		2.367
2.7051		2.9239		4.913		5.5097
3.9184		3.8787		4.7737		1.8896
1.7504		2.4863		6.365		5.092
2.7648		2.1681		3.1427		7.996
3.1825		4.7141		4.3958		4.4356
2.8443		4.1571		2.8841		3.9582
1.3128		5.5892		2.0089		6.3451
3.0234		4.0378		4.2367		2.188
4.9328		2.8841		2.8841		7.6579
2.8245		2.5062		4.4157		6.9617
2.9438		3.0631		2.546		6.2257
3.8985		3.0035		2.8245		3.8588
2.6057		2.4068		4.1969		3.2024
2.8642		4.356		3.9383		4.2367
2.0885		4.1571		4.2964		2.5261
3.4212		2.2476		4.5151		2.3272
2.2277		3.7394		4.9527		4.356
2.7449		3.6002		3.6599		5.1715
3.0631		4.3958		3.7593		3.6201
1.7703		2.3869		3.2223		5.3704
3.4411		1.7901		2.4863		6.4246
2.6653		4.0577		4.9925		6.4047
2.6852		4.6544		2.7847		4.0179
3.9781		4.7339		0.9746		1.9493
2.4068		3.1029		4.3958		3.2223
1.7703		1.8697		5.1914		1.5912
1.7106		2.4863		2.7847
3.5604		1.8697		5.808
4.2765		2.3272		4.2367
2.9836		2.8642		2.3272
3.5405		2.0487		2.8046
4.1372		3.5604		2.546
3.3615		3.1825		5.271
2.9637		5.7285		3.083
2.6454		4.7936		4.6345
2.2476		3.1228		5.1516
3.5206		2.2277		4.1372
2.2078		2.904		3.2223
3.3018		1.8896		3.4013
2.546		4.7141		2.904
1.6708		3.6201		2.3272
3.3615		3.9383		4.4754
3.64		3.3018		3.083
2.725		2.8841		4.8533
1.3128		3.5206		4.1372
2.8245		2.6057		3.7792
3.6996		4.3162		3.6002
3.3615		1.9095		3.3814
5.3903		4.1372		5.6091
2.7449		4.5549		2.5062
1.9294		5.808		3.1427
2.725		3.0234		5.7086
4.3759		2.188		3.5206
4.8931		1.9891		3.4411
1.6509		2.4465		3.998
4.1173		3.6002		3.083
3.7195		2.1681		2.4863
4.4555		3.2819		2.9239
2.7051		3.4411		1.7106
3.998		2.9637		2.7051
1.9095		2.2078		2.9637
3.819		2.3272		5.0323
3.4411		3.8389		3.2024
1.4918		2.0288		3.7991
2.2476		2.8245		2.4465
1.6111		3.5405		3.9383
3.0432		2.6057		4.177
3.5604		2.2476		3.3615
2.5261		3.2819		4.6743
2.0089		2.7847		2.2277
2.546		2.6653		4.7141
3.3018		2.7847		2.9438
5.1914		3.3018		2.8245
3.3615		3.8787		3.2422
2.0686		4.5151		4.3361
4.1969		3.7792		2.1681
2.1084		3.2024		4.7538
3.3018		4.6743		2.4863
3.3814		3.9582		3.1427
		3.3615		4.7936
		3.1427		2.9438
		2.8245		2.7648
		3.1029		3.7593
		3.3615		3.5803
		3.3814		3.4212
		4.3162		3.8389
		1.6509		2.725
		1.8498		4.3759
		2.2078		2.8245
		1.5912		3.6002
		3.7792		2.7847
		4.6942		2.725
		3.461
		1.9294
		2.8443
		1.7305
		2.8245
		1.9891
		4.0974
		3.2819
		4.5151
		4.2964
		3.1427
		5.0522
		1.7305
		2.6057
		3.0631
		3.7195
		2.3869
		2.725
		2.367
		3.5803
		3.0631
		2.0487
		3.3615
		3.3018
		3.3615
		5.1715
		3.2819
		2.0089
		2.188
		3.9383
		4.535
		4.1969
		2.3272
		3.4013
		4.1969
		1.7504
		3.1228
		1.3327
		2.546
		2.2874
		1.5117
		4.5947
		3.5405
		3.8588
		4.0577
		3.1825
		3.262
		2.5062
		3.1228
		4.2566
		4.0179
		3.4212
		4.5549
		3.3018
		2.4664
		2.1283
		2.1681
		3.4411
		4.177
		4.5549
		2.3073
		3.2819
		2.5659
		4.0974
		2.9239
		2.904
		2.5062
		2.4465
		4.1571
		0.915
		3.461
		3.7792
		1.7305
		1.6111
		4.2964
		3.4808
		3.6599
		2.4664
		3.8787
		2.5261
		3.8985
		2.2277
		4.356
		2.6255
		3.3615
		4.5947
		4.5947
		4.6743
		4.8334
		1.9294
		3.3416
		1.5912
		4.0378
		3.6599
		2.4266
		3.8588
		2.8841
		3.4013
		2.0288
		3.5604
		4.0974
		2.4863
		3.7593
		2.367
		3.8588
		1.6111
		4.1173
		2.6057
		2.5261
		4.7737
		5.5693
		2.5858
		3.2223
		2.5062
		3.3416
		3.5604
		3.083
		2.6852
		3.4411
		2.8046
		2.2874
		2.2874
		5.1516
		4.177
		2.7449
		2.3869
		2.0288
		2.5659
		3.0432
		3.8985
		3.1825
		2.2476
		1.6509
		5.4898
		4.6743
		2.5062
		2.4465
		3.7593
		2.6454
		1.8697
		3.1029
		2.7847
		1.0542
		1.7504
		5.2312
		3.3814
		3.64
		3.0631
		3.7394
		5.1119
		5.4301
		5.3704
		2.7648
		4.7936
		5.5296
		3.0432
		4.3361
		4.7141
		6.4445
		3.3018
		2.3471
		4.8334
		6.1064
		5.4102
		5.45
		7.1407
		3.5206
		4.5748
		3.3217
		2.8046
		4.0776
		5.4301
		4.7936
		6.8423
		3.1029
		4.6544
		5.6091
		3.083
		2.9239
		2.1482
		6.6633
		4.3162
		3.7991
		2.3272
		1.6509
		4.356
		2.7449
		4.6942
		1.7504
		2.6852
		2.2277
		5.3903
		4.6544
		3.6002
		3.64
		3.7195
		4.7141
		1.6708
		2.5858
		3.4013
		3.2422
		3.9781
		4.3162
		3.5803
		5.2312
		3.2819
		1.9294
		4.0179
		5.3704
		4.0974
		3.5007
		3.2223
		4.3361
		1.9294
		4.3759
		4.2367
		3.461
		3.64
		3.4808
		4.4356
		4.0776
		3.1228
		2.9438
		3.3217
		4.8931
		4.0776
		4.5947
		3.8787
		1.1735
		1.6907
		2.5062
		2.1482
		4.0577
		5.3108
		4.8334
		4.0378
		3.7195
		4.4754
		4.7141
		2.4465
		4.3361
		3.6996
		3.5803
		2.5659
		3.4013
		3.8588
		2.7051
		4.0974
		3.1228
		2.8642
		1.631
		4.6942
		4.4356
		2.6852
		2.6852
		3.9383
		2.9239
		3.4212
		4.177
		3.0631
		4.3361
		4.4157
		3.9781
		2.8841
		3.3217
		5.4102
		4.4754
		5.0124
		1.6509
		5.7683
		4.2367
		4.9328
		3.7593
		4.0179
		4.7141
		3.5007
		5.2312
		4.4754
		3.4212
		3.2819
		5.2113
		5.7285
		5.2113
		3.6797
		3.5803
		5.8279
		3.461
		3.2422
		2.4266
		2.9438
		2.2675
		4.3958
		5.0323
		4.1969
		3.461
		2.8443
		3.5206
		3.9383
		2.5062
		4.7737
		3.9781
		4.913
		2.4664
		5.4301
		4.8533
		5.6489
		2.6852
		5.4301
		2.2874
		2.7648
		3.262
		3.3217
		3.0432
		4.5549
		3.8389
		3.7792
		2.0288
		3.8389
		4.8732
		2.9836
		4.0378
		5.3506
		3.7792
		3.2422
		5.5296
		3.3615
		5.9473
		2.6653
		4.7936
		4.3759
		2.7051
		6.2854
		4.2566
		3.0631
		4.0378
		3.4411
		2.3272
		0.7956
		2.4068
		4.0974
		2.8245
		3.2819
		3.5604
		2.9438
		4.535
		4.2964
		2.9637
		4.2765
		5.3506
		1.7901
		4.2566
		3.8787
		5.6489
		3.5405
		6.0268
		5.5296
		4.177
		3.7394
		4.3759
		1.8498
		3.6201
		2.8841
		3.3814
		4.0776
		2.4863
		3.1825
		2.2277
		2.904
		3.262
		4.2964
		2.9239
		2.4863
		2.5858
		1.9891
		1.631
		3.1427
		2.8841
		3.4212
		1.7901
		2.2476
		2.3073
		3.1029
		3.2223
		3.8389
		2.2078
		2.6454
		1.3923
		1.6907
		2.6852
		3.4212
		3.262
		1.9095
		1.9493
		3.1427
		2.3869
		2.8245
		1.2133
		2.5261
		2.2675
		2.8841
		2.3272
		1.4719
		1.7106
		1.3526
		2.6454
		3.0631
		3.2223
		3.461
		1.5515
		2.6255
		3.1228
		2.4266
		1.9493
		5.5495
		3.083
		3.083
		2.8443
		3.4411
		3.1228
		2.4863
		2.6057
		1.2531
		1.4719
		1.9692
		2.0487
		1.7901
		2.3471
		1.3128
		2.5062
		2.367
		1.3327
		3.2223
		4.0179
		3.3814
		3.0035
		1.5912
		3.2223
		3.5405
		3.3615
		2.4465
		1.6907
		3.4212
		1.81
		1.9294
		1.3724
		2.7847
		2.4068
		1.2332
		2.2476
		1.8299
		2.2277
		1.9095
		1.9493
		1.7504
		3.2024
		2.3073
		2.546
		2.7051
		2.9637
		2.3869
		2.8642
		2.4863
		2.4068
		2.2874
		1.4918
		2.8046
		3.5007
		2.9637
		2.3073
		2.1681
		2.9836
		3.5803
		2.4863
		2.188
		2.5062
		2.1084
		2.6057
		3.3018
		3.5206
		1.4719
		2.4664
		2.0288
		3.7792
		1.6907
		2.6057
		3.3217
		2.4266
		1.9692
		2.8245
		2.2277
		3.0432
		2.9438
		4.7936
		3.7394
		2.0089
		2.0885
		3.1228
		1.81
		2.4863
		2.8443
		2.5858
		3.6797
		3.1427
		1.9692
		2.5659
		1.2332
		2.6852
		1.9493
		2.9637
		1.7305
		2.5062
		3.3217
		2.7449
		2.2277
		1.273
		5.1119
		3.5206
		3.4013
		2.4068
		3.3018
		3.6002
		2.0487
		2.4863
		3.7991
		2.9438
		3.7394
		3.5803
		1.631
		1.8498
		2.8642
		2.6653
		2.9438
		2.8245
		2.6255
		3.1427
		2.188
		3.0432
		3.5206
		2.9836
		3.3615
		1.4321
		2.6454
		2.8245
		2.6653
		3.1427
		2.7449
		3.2819
		2.3272
		1.9692
		2.725
		2.2078
		2.9637
		3.2422
		3.0234
		2.1482
		2.4863
		2.367
		3.083
		3.262
		3.3615
		4.3958
		3.1029
		3.8985
		2.6454
		2.4465
		1.9493
		2.1084
		3.64
		4.535
		2.6852
		2.6454
		2.5858
		2.4068
		2.3869
		3.6797
		3.6996
		2.9637
		4.2964
		3.2223
		2.367
		2.1084
		2.5261
		3.4212
		2.3471
		2.8245
		3.2024
		2.2277
		3.6599
		3.3416
		2.1681
		3.2819
		1.9294
		2.2476
		2.2675
		2.5062
		2.7051
		1.7901
		2.9438
		1.9095
		2.7847
		2.725
		2.2675
		3.1228
		3.3018
		2.7648
		2.904
		3.9184
		3.5007
		2.188
		1.7504
		2.5659
		2.0487
		2.4068
		1.8498
		2.8245
		2.1283
		2.2476
		2.0686
		2.0686
		3.3217
		2.725
		2.9438
		1.452
		1.9493
		2.7648
		2.4266
		2.6454
		1.5912
		2.1084
		3.9184
		2.546
		2.2874
		2.1482
		2.4664
		2.3869
		3.2819
		2.3272
		3.5206
		1.8896
		2.3272
		2.6653
		2.0288
		2.6255
		1.9891
		1.9493
		2.8046
		3.6996
		2.7847
		1.7901
		2.367
		1.8896
		2.725
		1.81
		2.3471
		1.1735
		1.5714
		1.8299
		2.9239
		1.1139
		2.0288
		2.3869
		3.2024
		3.2819
		2.3272
		2.6454
		2.0487
		3.5604
		2.0686
		2.6454
		3.0234
		2.8642
		3.4013
		2.5659
		2.904
		2.5858
		2.5261
		2.3471
		2.1482
		2.6454
		2.7648
		3.5604
		2.2675
		3.5405
		2.9637
		3.3615
		3.2024
		2.9637
		2.1482
		2.8841
		3.1825
		2.5858
		2.725
		2.5261
		3.2819
		3.1626
		2.6454
		2.0288
		2.0089
		2.0885
		2.4266
		2.4465
		2.0686
		2.1283
		3.7792
		3.0234
		2.4068
		2.2476
		2.5062
		2.0885
		2.5659
		2.0885
		3.1626
		2.7648
		3.8985
		2.9239
		3.7394
		3.1029
		1.7305
		2.6454
		2.2675
		2.3272
		1.3327
		2.8046
		3.1427
		3.1228
		2.1283
		2.4266
		1.9493
		2.904
		3.461
		2.7051
		2.8841
		3.0234
		2.4068
		2.4664
		1.8697
		3.262
		5.2909
		1.9493
		2.7449
		2.3869
		2.904
		3.083
		2.8046
		3.1825
		3.461
		3.1427
		3.0035
		3.6201
		1.1735
		2.1482
		2.546
		1.6708
		1.9891
		4.6544
		3.3018
		2.6653
		4.9726
		3.4808
		2.9637
		3.5007
		3.4013
		2.9836
		2.6454
		3.3217
		3.9184
		2.6255
		3.0432
		4.7339
		3.4212
		4.6146
		2.1283
		3.6996
		2.546
		2.9836
		2.3073
		4.0577
		3.0631
		3.0234
		2.6454
		1.8498
		1.4321
		3.0234
		2.8642
		3.0631
		1.631
		2.8443
		2.6653
		3.4013
		3.64
		5.4898
		5.5097
		4.177
		2.7648
		2.0487
		3.8389
		2.5858
		2.5062
		4.4157
		5.1119
		1.9692
		3.6201
		3.0631
		4.3759
		2.367
		1.2531
		3.4411
		3.7991
		2.2078
		1.3327
		1.7901
		3.5007
		3.3018
		3.819
		3.1427
		2.367
		3.0631
		2.6852
		4.3361
		3.5604
		3.8389
		4.8135
		1.5515
		4.6743
		3.7195
		3.0432
		3.2223
		4.6544
		2.2277
		2.904
		4.1571
		3.6797
		2.8642
		2.9239
		1.2929
		1.9493
		1.7901
		3.6201
		2.1084
		3.6002
		2.3272
		2.9239
		1.5714
		2.8841
		2.2476
		1.8498
		2.0487
		3.1427
		2.546
		3.3018
		3.1825
		3.0432
		4.0577
		2.8245
		2.8642
		1.9095
		4.3958
		2.725
		3.1029
		2.5062
		3.1626
		3.5803
		4.4754
		2.5261
		3.6002
		2.2874
		3.083
		1.3724
		3.0234
		1.2531
		1.8299
		1.452
		2.7051
		3.7593
		3.1029
		3.7394
		1.81
		3.5405
		1.9692
		3.6002
		1.3128
		3.2223
		2.5858
		3.1029
		2.6057
		1.7504
		3.8985
		3.6599
		2.3471
		3.3018
		1.9891
		2.2277
		3.0234
		3.819
		2.2874
		3.6797
		3.3615
		4.4157
		3.083
		3.8985
		3.083
		1.2332
		3.4013
		2.8245
		5.4301
		4.4356
		4.1969
		3.6201
		1.9493
		1.631
		2.6255
		3.8787
		1.6708
		2.2874
		1.631
		1.7901
		2.5261
		4.5151
		3.2819
		2.6454
		2.3272
		2.367
		3.7195
		3.6599
		2.725
		4.2765
		3.5007
		2.5659
		3.1427
		2.9438
		3.7991
		5.1715
		4.4555
		3.2422
		2.6255
		1.8299
		3.4411
		3.1626
		3.7792
		1.273
		1.8299
		3.2422
		3.9184
		3.2422
		3.1626
		3.262
		5.0522
		2.725
		2.5062
		2.1482
		3.3814
		1.7901
		4.7538
		2.0288
		3.9184
		1.9692
		1.4719
		5.0721
		1.5515
		2.6653
		3.083
		2.6653
		2.1482
		2.0686
		2.188
		3.6002
		1.81
		1.5912
		3.3615
		2.8245
		3.083
		2.7847
		2.9239
		5.2909
		1.9692
		1.4918
		3.4212
		3.1029
		2.367
		1.7106
		3.8787
		2.2874
		1.9095
		1.6907
		1.8697
		2.5261
		2.7648
		2.8841
		4.2566
		4.1571
		4.0974
		3.9582
		2.1482
		3.461
		3.0432
		3.6797
		3.0432
		3.2819
		2.4465
		4.2168
		2.0487
		1.7106
		1.3526
		3.4013
		5.8279
		2.0686
		1.8299
		5.0522
		3.7991
		2.5659
		2.4068
		3.819
		2.7051
		1.7901
		2.1482
		2.7051
		1.4719
		2.3272
		2.3471
		2.6653
		3.3217
		2.367
		3.5007
		3.7991
		2.6653
		3.9582
		4.0179
		2.6057
		1.9692
		3.2223
		3.5604
		2.5858
		3.4212
		3.262
		2.0686
		2.9438
		2.725
		2.0089
		3.5604
		4.177
		4.3759
		4.3162
		2.6057
		2.5261
		3.5405
		2.3471
		3.5206
		3.0234
		2.2874
		3.6797
		3.1228
		2.6852
		1.6708
		3.7792
		3.262
		5.6489
		3.3217
		2.1283
		3.8588
		1.9294
		2.6057
		2.546
		3.998
		2.3272
		2.9637
		4.8135
		3.3814
		1.452
		2.7648
		4.2367
		2.188
		2.3471
		1.7305
		3.8985
		3.0234
		3.3615
		2.7449
		1.4719
		2.4266
		2.2476
		2.7847
		1.3724
		2.8245
		1.8498
		5.2909
		3.6002
		2.8841
		3.2024
		3.9781
		3.1427
		2.5261
		3.5803
		2.1482
		4.9328
		3.1626
		3.0432
		2.6852
		4.177
		2.3471
		3.4212
		3.3416
		4.6942
		2.904
		2.7449
		2.4664
		1.7901
		2.3272
		1.5515
		1.9692
		2.3272
		1.6708
		2.8443
		1.9891
		2.6852
		5.271
		3.3615
		2.904
		2.0288
		2.0686
		1.5316
		2.7847
		3.8985
		1.8896
		1.452
		4.5549
		3.1626
		2.0487
		2.904
		2.2078
		2.0487
		2.0089
		2.5858
		3.5803
		4.2765
		4.535
		1.9493
		2.6653
		4.0179
		2.6653
		2.4465
		4.1372
		2.4465
		6.1462
		4.6345
		3.6002
		4.0179
		4.913
		1.3526
		2.8046
		4.5748
		4.4356
		2.9239
		1.9692
		2.367
		4.5549
		3.461
		3.1825
		3.0035
		3.4808
		3.7593
		3.8985
		4.6146
		3.0035
		4.0974
		2.0288
		3.3217
		1.2531
		1.9692
		2.5062
		2.725
		2.4863
		2.5858
		3.083
		3.5604
		2.6454
		1.7106
		1.8896
		1.8498
		4.4555
		3.3416
		3.1427
		2.367
		4.0378
		1.7504
		1.3724
		1.8697
		3.4808
		2.6255
		2.0885
		2.8245
		3.8588
		4.2367
		3.8588
		3.8588
		2.7847
		5.092
		3.0631
		3.5007
		3.5206
		2.8443
		2.8841
		3.5007
		3.3615
		3.0631
		2.2078
		2.546
		2.5659
		4.9328
		2.5659
		4.4754
		4.3958
		3.0035
		4.3759
		3.8787
		2.0686
		2.5062
		3.083
		3.1029
		2.3073
		1.9493
		2.8443
		2.0288
		3.1825
		2.5062
		3.2223
		2.6852
		3.7792
		1.8299
		2.0885
		4.2765
		3.262
		1.8299
		2.0089
		2.7847
		3.8787
		2.6255
		3.64
		2.2675
		2.6255
		6.0069
		4.2168
		4.2168
		2.2874
		3.2223
		3.262
		3.998
		2.2874
		5.8478
		4.0974
		4.3361
		1.3923
		1.1934
		3.3018
		2.6653
		1.9891
		4.0378
		3.7593
		2.9438
		3.2819
		2.8046
		3.1626
		3.6599
		3.1029
		3.819
		4.0974
		3.8985
		3.0631
		2.188
		4.9925
		1.9493
		3.0035
		2.1681
		2.8642
		4.1173
		3.0432
		3.0432
		2.9836
		3.3018
		3.3018
		4.4356
		2.4863
		2.2277
		3.4013
		3.8588
		2.4465
		2.904
		2.4068
		2.6653
		3.3416
		2.2078
		3.2223
		2.904
		1.8697
		2.0089
		3.7394
		2.4068
		2.8443
		3.9781
		1.81
		1.452
		2.0288
		3.6797
		2.0288
		1.6708
		3.8389
		2.4068
		2.6852
		0.7956
		1.5714
		3.8985
		3.3814
		1.8896
		3.998
		2.3272
		2.8841
		1.9294
		3.0234
		3.4808
		1.8498
		4.177
		2.4266
		3.5604
		0.9547
		4.535
		2.9836
		3.9383
		2.7648
		3.6599
		1.6708
		2.9438
		2.367
		2.4068
		2.2476
		2.4465
		1.9095
		2.9637
		3.7593
		4.4555
		3.0631
		3.819
		3.262
		2.7648
		1.7305
		3.1427
		3.64
		2.6255
		1.8697
		2.188
		4.8334
		2.2675
		6.1064
		2.2675
		3.1626
		3.461
		5.1715
		3.5007
		2.6653
		3.1228
		3.4411
		1.6111
		3.7394
		2.6653
		2.5659
		3.2819
		3.8389
		3.3416
		4.6345
		2.8443
		2.9239
		3.1427
		2.5659
		2.4266
		1.81
		2.0288
		4.7538
		1.631
		3.3814
		3.0234
		1.7901
		2.3869
		1.1934
		2.3272
		2.2078
		1.4918
		3.7195
		2.0288
		4.6345
		3.3814
		2.6852
		3.083
		3.6201
		1.3724
		2.725
		5.3704
		4.1173
		2.8443
		6.0069
		2.8642
		1.9692
		4.1969
		4.9527
		3.998
		2.8443
		3.6002
		4.4754
		2.904
		3.3814
		2.2874
		2.9239
		3.6002
		4.356
		3.1228
		4.5151
		1.7703
		4.2964
		5.4898
		7.6181
		5.3704
		2.5062
		4.7936
		2.188
		2.6057
		3.7792
		3.083
		4.8533
		3.3018
		5.7484
		2.4664
		6.9418
		1.9095
		2.5261
		3.9582
		3.4808
		3.0631
		2.8245
		2.7847
		4.9925
		5.8279
		1.631
		5.0124
		5.4301
		4.3759
		2.3272
		3.5604
		2.4068
		3.1427
		3.9383
		3.3217
		2.2476
		2.7449
		2.3869
		3.1427
		3.5604
		3.7394
		2.2078
		4.3958
		1.5316
		2.5858
		5.8279
		4.0776
		1.9294
		3.1626
		2.6454
		4.5151
		2.0885
		3.3416
		2.6255
		3.2819
		3.9184
		4.1571
		3.819
		3.262
		3.998
		4.4754
		3.5405
		4.3958
		4.8135
		3.1825
		4.5947
		2.8642
		2.188
		2.6255
		3.0234
		3.819
		3.64
		2.2874
		3.7195
		2.4664
		3.262
		4.2367
		3.5803
		4.6345
		5.629
		2.1084
		4.2964
		4.2566
		2.0487
		1.8697
		2.546
		3.0631
		2.0487
		3.9383
		5.5693
		2.0686
		6.4445
		4.6544
		3.8389
		2.8046
		3.4212
		4.4356
		4.8732
		1.6111
		3.4013
		3.5604
		2.3073
		6.6235
		3.2422
		2.4465
		6.1661
		4.2168
		4.8135
		3.1626
		2.188
		5.3704
		2.2675
		5.3903
		3.2422
		1.2929
		4.9328
		2.0686
		1.9294
		2.2874
		3.5604
		4.9726
		3.0035
		3.4411
		2.5659
		2.2675
		5.0323
		5.0522
		3.1825
		2.546
		3.819
		4.0776
		4.1969
		4.4157
		2.9239
		3.0035
		1.452
		3.262
		2.7449
		2.6255
		3.0631
		1.81
		3.9582
		3.3018
		3.6002
		4.8732
		3.9184
		5.1516
		2.0686
		2.7449
		3.0432
		2.904
		3.4411
		3.5405
		4.6743
		6.0268
		2.1283
		2.3471
		3.9184
		3.8588
		6.4246
		4.5748
		5.7683
		2.904
		2.5858
		1.5515
		2.5659
		4.6743
		3.1427
		5.7086
		4.5151
		5.6489
		3.461
		5.2113
		4.5748
		3.8985
		1.2133
		2.5858
		4.8533
		2.5062
		3.8985
		4.535
		1.6111
		4.0577
		5.2511
		3.0035
		4.2765
		5.1119
		4.2765
		4.8732
		4.3162
		2.3869
		4.4754
		3.083
		3.64
		4.0776
		5.2113
		3.5206
		4.2964
		2.0686
		2.4863
		4.2367
		1.6708
		3.3615
		2.9239
		5.2909
		4.1969
		2.546
		3.7195
		2.9836
		3.4212
		5.3506
		2.2078
		4.6544
		3.6599
		3.4808
		2.6057
[truncated: 306 more rows]
