# Supplementary material for: The conserved centrosomin motif, γTuNA, forms a dimer that directly activates microtubule nucleation by the γ-tubulin ring complex (γTuRC)
Source: eLife journal article supplement (doi:10.7554/elife.80053), 2022-12-14
Supplement: fig5-figsupp1-data1 [file Figure 5 - Supplement 1 - Source Data 1.xlsx]

## Sheet: Figure 5 - Supp 1D
Slope of curves in Fig. 5C from 30 sec to 150 sec:
Generates the late stage nucleation rate (k) at saturation, which is number of MTs nucleated/sec
equivalent to: number of new gTuRCs nucleating /sec
Late -stage Nucleation Rates (k) in #MTs/sec
Buffer			Wildtype			F75A			L77A
	k (#MTs/sec)			k (#MTs/sec)			k (#MTs/sec)			k (#MTs/sec)
Dataset 1	0.117349		Dataset 1	0.260373		Dataset 1	0.167517		Dataset 1	0.285944
Dataset 2	0.10953		Dataset 2	0.212107		Dataset 2	0.0738369		Dataset 2	0.254646
Dataset 3	0.279731		Dataset 3	0.139517		Dataset 3	0.289663		Dataset 3	0.340043
Dataset 4	0.176773		Dataset 4	0.0991113		Dataset 4	0.123498
Dataset 5	0.261007		Dataset 5	0.171131
Dataset 6	0.299299		Dataset 6	0.106867
			Dataset 7	0.118004
Mean Late-Stage Nucleation Rates (k) in #MTs/sec
	Buffer	Wildtype	F75A	L77A
Mean	0.207281	0.158159	0.163629	0.293544
Error (std)	0.083877	0.0600054	0.0923269	0.0432026
SEM	0.0342426	0.0226799	0.0461635	0.024943
Normalized Mean Late-Stage Nucleation Rates (k) in #MTs/sec
	Buffer	Wildtype	F75A	L77A
Mean	1	0.763013	0.789404	1.41616
Error (std)	0.404652	0.289487	0.445418	0.208425
SEM	0.165199	0.109416	0.222709	0.120334
Student's T-test, two-sample unpaired, unequal variance
	Buffer	Wildtype	F75A	L77A
p-value	1	0.26252	0.475876	0.081899
Less than p = 0.05?
Significant?	FALSE	FALSE	FALSE	FALSE
