# Supplementary material for: The conserved centrosomin motif, γTuNA, forms a dimer that directly activates microtubule nucleation by the γ-tubulin ring complex (γTuRC)
Source: eLife journal article supplement (doi:10.7554/elife.80053), 2022-12-14
Supplement: fig6-data1 [file Figure 6 - Source Data_final.xlsx]

## Sheet: Figure 6B-Extract
Raw EB1 counts (MT number) for each condition
	No gTuNA	No gTuNA	No gTuNA	No gTuNA	+ gTuNA	+ gTuNA	+ gTuNA	+ gTuNA
	Buffer	0.45 µM	1.35µM	2.7µM	Buffer	0.45 µM	1.35µM	2.7µM	Stathmin µM
Dataset 1	3	2	0	0	282	291	76	4
Dataset 2	8	30	4	9	239	334	245	79
Dataset 3	24	11	7	8	372	128	93	25
Dataset 4	29	18	23	7	181	302	159	197
Normalized by buffer control for that extract
	No gTuNA	No gTuNA	No gTuNA	No gTuNA	+ gTuNA	+ gTuNA	+ gTuNA	+ gTuNA
	Buffer	0.45 µM	1.35µM	2.7µM	Buffer	0.45 µM	1.35µM	2.7µM	Stathmin µM
Dataset 1	1	0.666667	0	0	94	97	25.3333	1.33333
Dataset 2	1	3.75	0.5	1.125	29.875	41.75	30.625	9.875
Dataset 3	1	0.458333	0.291667	0.333333	15.5	5.33333	3.875	1.04167
Dataset 4	1	0.62069	0.793103	0.241379	6.24138	10.4138	5.48276	6.7931
Averaged by condition
	No gTuNA	No gTuNA	No gTuNA	No gTuNA	+ gTuNA	+ gTuNA	+ gTuNA	+ gTuNA
	Buffer	0.45 µM	1.35µM	2.7µM	Buffer	0.45 µM	1.35µM	2.7µM	Stathmin µM
Mean	1	1.37392	0.396193	0.424928	36.4041	38.6243	16.329	4.76078
St. err	0	0.793285	0.167384	0.243712	19.8046	21.0587	6.82029	2.15764

## Sheet: Figure 6D-in vitro
Mean Intensity (MT mass) at 250 seconds
	No gTuNA	No gTuNA	No gTuNA	+ gTuNA	+ gTuNA	+ gTuNA
	Buffer	2.5 µM	4 µM	Buffer	2.5 µM	4 µM	Stathmin µM
Dataset 1	8.3773	2.21008	0.82489	29.4859	16.1904	7.37926
Dataset 2	6.80534	2.42506	0.390072	32.5588	10.103	9.57767
Dataset 3	12.1409	6.62247	0.397854	28.3867	16.0601	17.0698
Dataset 4			5.15167			8.38314
Dataset 5						0.120621
Averaged across experiments
	No gTuNA	No gTuNA	No gTuNA	+ gTuNA	+ gTuNA	+ gTuNA
	Buffer	2.5 µM	4 µM	Buffer	2.5 µM	4 µM	Stathmin µM
Mean	9.10784	3.75254	1.69112	30.1438	14.1178	8.5061
St. Dev	2.74175	2.48776	2.31596	2.16247	3.47758	6.0433
Normalized by buffer control
	No gTuNA	No gTuNA	No gTuNA	+ gTuNA	+ gTuNA	+ gTuNA
	Buffer	2.5 µM	4 µM	Buffer	2.5 µM	4 µM	Stathmin µM
Norm. mean	1	0.412012	0.185678	3.30966	1.55007	0.933931
Norm St. Dev	0.301032	0.273144	0.254282	0.237429	0.381822	0.663528

## Sheet: Figure 6E- in vitro_no stathmin
Number of MTs generated over 5 min
(all at 7 µM tubulin)
Raw counts	Buffer	+ gTuNA			Buffer	+ gTuNA		Normalized	Buffer	+ gTuNA
	1	37		Mean	1.5	38.6667		Norm. mean	1	25.7778
	2	55		St. Dev	0.707107	15.5671		St Dev	0.471405	10.378
		24		SEM	0.5	8.98765		SEM	0.333333	5.99176
