# Supplementary material for: The conserved centrosomin motif, γTuNA, forms a dimer that directly activates microtubule nucleation by the γ-tubulin ring complex (γTuRC)
Source: eLife journal article supplement (doi:10.7554/elife.80053), 2022-12-14
Supplement: supp1 [file Primers - Supplemental File.xlsx]

## Sheet: Primers
Name	Identifier (MR+"#")	Sequence (5'-3')	Size (bp)	Tm (˚C)	Purpose
MR_Vec REV v2	232	ggagacggtcacagcttgtctg	22	63	Use to generate ST50 vector fragments. Pair with Forward primer of insert to generate proper fragment.
MR_Vec Fwd v2	233	cagacaagctgtgaccgtctcc	22	63	Use to generate ST50 vector fragments. Pair with Reverse primer of insert to generate proper fragment.
MR_g2Halo Vec F	342	cgctcgagatttccggtCTGGAAGTACTGTTCCAAGGACCT	41	63	Replace GFP with Halo (using GFP-gTuNA plasmids as input)
MR_g2Halo Vec R	343	ccgatttctgcCATAgatcCCTGGAAGTACAGGTTTTCACCACC	44	63	Replace GFP with Halo (using GFP-gTuNA plasmids as input)
MR_g2Halo Ins F	344	GTACTTCCAGGgatcTATGgcagaaatcggtactggctttccat	44	63	Replace GFP with Halo (using GFP-gTuNA plasmids as input)
MR_g2Halo Ins R	345	ACAGTACTTCCAGaccggaaatctcgagcgtcgacagccag	41	63	Replace GFP with Halo (using GFP-gTuNA plasmids as input)
MR_AU1hsgT Vec F1	380	CCTTCGGACACTTACCGATATATAggtTCTCCCACCAGAGCACGGAACATGAA	53	64	Adding AU1 epitope to Halo-human gTuNA construct. (Use with 232, 233 to generate fragments)
MR_SHtHaloAU1 Ins R1	381	agaaccTATATATCGGTAAGTGTCCGAAGGTCCTTGGAACAGTACTTCCAGaccg	55	63	Adding AU1 epitope to Halo-human gTuNA construct. (Use with 232, 233 to generate fragments)
MR_hgTu_MutSt1_F	387	GAAAATCAAGATACTGAAGACAAGAAAGAAAACTTTAACCTAAAGCTCCGCATCTATTTCC	61	63	Mutating Ile67 and Leu70 to Asp. Hypothesis: no dimer formation. Use with 232, 233 to generate fragments.
MR_hgTu_MutSt1_R	388	TAGGTTAAAGTTTTCTTTCTTGTCTTCAGTATCTTGATTTTCAAAGTCCTTCATGTTCCGTGCT	64	63	Mutating Ile67 and Leu70 to Asp. Hypothesis: no dimer formation. Use with 232, 233 to generate fragments.
MR_hgTu_MutSt2_F	389	AATCAAGATACTGAAGACAAGAAAGAAAACTTTAACGATAAGCTCCGCATCTATTTCCTTGAGGAAAGAATG	72	63	One shot mutation of Ile67, Leu70, and Leu77 to Asp. Use with 232, 233.
MR_hgTu_MutSt2_R	390	ATCGTTAAAGTTTTCTTTCTTGTCTTCAGTATCTTGATTTTCAAAGTCCTTCATGTTCCGTGCTCT	66	63	One shot mutation of Ile67, Leu70, and Leu77 to Asp. Use with 232, 233.
MR_XgTu_MutSt1_F	391	GAAACAGGATGCAGAAGACAAAAAAGAGAACTTCAACCTCAAACTCAGAATTTACTTCC	59	63	Mutating Ile67 and Leu70 to Asp. Hypothesis: no dimer formation. Use with 232, 233 to generate fragments.
MR_XgTu_MutSt1_R	392	GTTCTCTTTTTTGTCTTCTGCATCCTGTTTCTCGAAGTCTTTCATAGGTCCTTGGAAC	58	63	Mutating Ile67 and Leu70 to Asp. Hypothesis: no dimer formation. Use with 232, 233 to generate fragments.
MR_HXgT2xD_Mut_F	401	GAAACAGGCTGCAGAAGCAAAAAAAGAGAACTTCAACCTCAAACTCAGAATTTACTTCC	59	63	Mutating Xenopus I67 and L70 to Alanine. Hypothesis: Weaker dimerization. Use with 232, 233 to generate fragments.
MR_HXgT2xD_Mut_R	402	GTTCTCTTTTTTTGCTTCTGCAGCCTGTTTCTCGAAGTCTTTCATAGGTCCTTGGAAC	58	62	Mutating Xenopus I67 and L70 to Alanine. Hypothesis: Weaker dimerization. Use with 232, 233 to generate fragments.
MR_HXgT3xD_Mut_F	403	GCAGAGAAACAGGCTGCAGAAgcaAAAAAAGAGAACTTCAACCTCAAACTCAGAATTTACTTCC	64	61	Mutating Xenopus F63, I67, and L70 to Alanine. Hypothesis: Weaker dimerization. Use with 232, 233 to generate fragments.
MR_HXgT3xD_Mut_R	404	ttttgcTTCTGCagcCTGTTTCTCtgcGTCTTTCATAGGTCCTTGGAACAGTACTTCCAGacc	63	62	Mutating Xenopus F63, I67, and L70 to Alanine. Hypothesis: Weaker dimerization. Use with 232, 233 to generate fragments.
MR_HhgT3xD_Mut_F	405	AATCAAGCTACTGAAGCAAAGAAAGAAAACTTTAACGCTAAGCTCCGCATCTATTTCCTTGAGGAAAGAATG	72	63	Mutating human I67, L70, L77 to Alanine. Hypothesis: Weaker dimerization. Use with 232, 233 to generate fragments.
MR_HhgTu3x_Mut_R	406	AGCGTTAAAGTTTTCTTTCTTTGCTTCAGTAGCTTGATTTTCAAAGTCCTTCATGTTCCGTGCTCT	66	63	Mutating human I67, L70, L77 to Alanine. Hypothesis: Weaker dimerization. Use with 232, 233 to generate fragments.
MR_HhgTu4x_Mut_R	407	AGCGTTAAAGTTTTCTTTCTTTGCTTCAGTAGCTTGATTTTCTGCGTCCTTCATGTTCCGTGCTCTGGTG	70	63	Mutating human F63, I67, L70, L77 to Alanine. Hypothesis: Weaker dimerization. Use with 232, 233, and 405 to generate fragments.
MR_HhgT2xD_Mut_F	408	GAAAATCAAGCTACTGAAGCAAAGAAAGAAAACTTTAACCTAAAGCTCCGCATCTATTTCC	61	63	Mutating human I67 and L70 to Alanine. Hypothesis: Weaker dimerization. Use with 232, 233 to generate fragments.
MR_HhgT2xD_Mut_R	409	TAGGTTAAAGTTTTCTTTCTTTGCTTCAGTAGCTTGATTTTCAAAGTCCTTCATGTTCCGTGCT	64	63	Mutating human I67 and L70 to Alanine. Hypothesis: Weaker dimerization. Use with 232, 233 to generate fragments.
MR_HXgT_F6A_Mut_F	410	ACCTATGAAAGACGCTGAGAAACAGATTGCAGAACTCAAAAAAGAGAACTTCAACC	56	63	Mutating Xenopus F63 to Alanine. Hypothesis: Weaker dimerization. Use with 232, 233 to generate fragments.
MR_HXgT_F6A_Mut_R	411	GCAATCTGTTTCTCAGCGTCTTTCATAGGTCCTTGGAACAGTACTTCCAGac	52	62	Mutating Xenopus F63 to Alanine. Hypothesis: Weaker dimerization. Use with 232, 233 to generate fragments.
MR_HXgT_I6A_Mut_F	412	GACTTCGAGAAACAGGCCGCAGAACTCAAAAAAGAGAACTTCAACCTCAAACTCA	55	62	Mutating Xenopus I67 to Alanine. Hypothesis: Weaker dimerization. Use with 232, 233 to generate fragments.
MR_HXgT_I6A_Mut_R	413	CTTTTTTGAGTTCTGCGGCCTGTTTCTCGAAGTCTTTCATAGGTCCTTGGAAC	53	62	Mutating Xenopus I67 to Alanine. Hypothesis: Weaker dimerization. Use with 232, 233 to generate fragments.
MR_HXgT_L70A_Mut_F	414	AACAGATTGCAGAAGCTAAAAAAGAGAACTTCAACCTCAAACTCAGAATTTACTTCCTG	59	62	Mutating Xenopus L70 to Alanine. Hypothesis: Weaker dimerization. Use with 232, 233 to generate fragments.
MR_HXgT_L70A_Mut_R	415	AGGTTGAAGTTCTCTTTTTTAGCTTCTGCAATCTGTTTCTCGAAGTCTTTCATAGGTCC	59	62	Mutating Xenopus L70 to Alanine. Hypothesis: Weaker dimerization. Use with 232, 233 to generate fragments.
MR_HXgT_L77A_Mut_F	416	AAAGAGAACTTCAACGCAAAACTCAGAATTTACTTCCTGGAGGAGCAGG	49	62	Mutating Xenopus L77 to Alanine. Hypothesis: Weaker dimerization. Use with 232, 233 to generate fragments.
MR_HXgT_L77A_Mut_R	417	GGAAGTAAATTCTGAGTTTTGCGTTGAAGTTCTCTTTTTTGAGTTCTGCAATCTGTTTCTC	61	62	Mutating Xenopus L77 to Alanine. Hypothesis: Weaker dimerization. Use with 232, 233 to generate fragments.
MR_HXgT_F6D_Mut_F	418	ACCTATGAAAGACGATGAGAAACAGATTGCAGAACTCAAAAAAGAGAACTTCAACC	56	63	Mutating Xenopus F63 to Aspartate (D). Hypothesis: Weaker dimerization. Use with 232, 233 to generate fragments.
MR_HXgT_F6D_Mut_R	419	GCAATCTGTTTCTCATCGTCTTTCATAGGTCCTTGGAACAGTACTTCCAGac	52	63	Mutating Xenopus F63 to Aspartate (D). Hypothesis: Weaker dimerization. Use with 232, 233 to generate fragments.
MR_HXgT_I6D_Mut_F	420	GACTTCGAGAAACAGGACGCAGAACTCAAAAAAGAGAACTTCAACCTCAAACTCA	55	63	Mutating Xenopus I67 to Aspartate (D). Hypothesis: Weaker dimerization. Use with 232, 233 to generate fragments.
MR_HXgT_I6D_Mut_R	421	CTTTTTTGAGTTCTGCGTCCTGTTTCTCGAAGTCTTTCATAGGTCCTTGGAAC	53	63	Mutating Xenopus I67 to Aspartate (D). Hypothesis: Weaker dimerization. Use with 232, 233 to generate fragments.
MR_HXgT_L70D_Mut_F	422	AACAGATTGCAGAAGATAAAAAAGAGAACTTCAACCTCAAACTCAGAATTTACTTCCTG	59	63	Mutating Xenopus L70 to Aspartate (D). Hypothesis: Weaker dimerization. Use with 232, 233 to generate fragments.
MR_HXgT_L70D_Mut_R	423	AGGTTGAAGTTCTCTTTTTTATCTTCTGCAATCTGTTTCTCGAAGTCTTTCATAGGTCC	59	63	Mutating Xenopus L70 to Aspartate (D). Hypothesis: Weaker dimerization. Use with 232, 233 to generate fragments.
MR_HXgT_L77D_Mut_F	424	AAAGAGAACTTCAACGACAAACTCAGAATTTACTTCCTGGAGGAGCAGG	49	63	Mutating Xenopus L77 to Aspartate (D). Hypothesis: Weaker dimerization. Use with 232, 233 to generate fragments.
MR_HXgT_L77D_Mut_R	425	GGAAGTAAATTCTGAGTTTGTCGTTGAAGTTCTCTTTTTTGAGTTCTGCAATCTGTTTCTC	61	63	Mutating Xenopus L77 to Aspartate (D). Hypothesis: Weaker dimerization. Use with 232, 233 to generate fragments.
MR_SH3gTuNA Vec F	444	CAGCGGATCTGGTCTGGAAGTACTGTTCCAAGGACCTATGAAA	43	63	Use with 232, 233 on SHT-Halo-Xen-gTuNA to turn it into SHT-Xen_gTuNA (to generate small N-term tags versions of different gTuNA WTs and mutants)
MR_SH3gTuNA Vec R	445	GAACAGTACTTCCAGACCAGATCCGCTGCTGTGATGAT	38	63	Use with 232, 233 on SHT-Halo-Xen-gTuNA to turn it into SHT-Xen_gTuNA (to generate small N-term tags versions of different gTuNA WTs and mutants)

## Sheet: Plasmids Table
Name	Species	N-term tag versions	Fused GCN4 version?	Sequence	Mutation Type
Wildtype	H. sapiens (H.s)	SH-3C; SH-Halo-3C-; SH-Halo-3C-AU1	No	SPTRARNMKDFENQITELKKENFNLKLRIYFLEERMQQEFHGPTEH	None
Wildtype	X. laevis (X.l.)	SH-TEV; SH-3C; SH-TEV-GFP; SH-Halo-3C-	Yes, SH-Halo-3C-(𝛾TuNA)-GCN4	...MKDFEKQIAELKKENFNLKLRIYFLEEQVQQKCDNSSEDLYRMNIE	None
F63A	H.s./X.l.	SH-3C; SH-Halo-3C	No	...MKD{A}EKQIAELKKENFNLKLRI…	Weakened hydrophobic
I67A	H.s./X.l.	SH-3C; SH-Halo-3C	Yes, SH-Halo-3C-(𝛾TuNA)-GCN4	...MKDFEKQ{A}AELKKENFNLKLR...	Weakened hydrophobic
L70A	H.s./X.l.	SH-3C; SH-Halo-3C	Yes, SH-Halo-3C-(𝛾TuNA)-GCN4	...MKDFEKQIAE{A}KKENFNLKLR...	Weakened hydrophobic
F75A	H.s./X.l.	SH-3C; SH-Halo-3C	Yes, SH-Halo-3C-(𝛾TuNA)-GCN4	...MKDFEKQIAELKKEN{A}NLKLR...	Weakened hydrophobic
L77A	H.s./X.l.	SH-3C; SH-Halo-3C	Yes, SH-Halo-3C-(𝛾TuNA)-GCN4	...MKDFEKQIAELKKENFN{A}KLR...	Weakened hydrophobic
I67A/L70A	H.s./X.l.	SH-3C; SH-Halo-3C	No	...MKDFEKQ{A}AE{A}KKENFNLKLR...	Weakened hydrophobic (2x)
F63D	X.l.	SH-Halo-3C	No	...MKD{D}EKQIAELKKENFNLKLR…	Flip to hydrophilic
I67D	X.l.	SH-Halo-3C	No	...MKDFEKQ{D}AELKKENFNLKLR...	Flip to hydrophilic
L70D	X.l.	SH-Halo-3C	No	...MKDFEKQIAE{D}KKENFNLKLR...	Flip to hydrophilic
F75D	X.l.	SH-Halo-3C	No	...MKDFEKQIAELKKEN{D}NLKLR...	Flip to hydrophilic
L77D	X.l.	SH-Halo-3C	No	...MKDFEKQIAELKKENFN{D}KLR...	Flip to hydrophilic
I67D/L70D	H.s./X.l.	SH-Halo-3C	Yes, SH-Halo-3C-(𝛾TuNA)-GCN4	...MKDFEKQ{D}AE{D}KKENFNLKLR...	Flip to hydrophilic (2x)
I67D/L70D/L77D	H.s.	SH-Halo-3C	No	SPTRARNMKDFENQ{D}TE{D}KKENFN{D}KLRIYFLEERMQQEFHGPTEH	Flip to hydrophilic (3x)
